# Supplementary material for: Human dental pulp stem cell-derived exosomes inhibit adipogenesis and obesity by activating Wnt/β-catenin signaling
Source: Research Square preprint supplement (doi:10.21203/rs.3.rs-8023093/v1), 2025-12-14
Supplement: Supplementary file 1 [file 41f9f23d144ea9c1d6b9a30a.xlsx]

## Sheet: DE_mRNA_Diff
List of differentially expressed mRNAs in Diff vs Undiff
Gene_ID	Symbol	Description	log2FC	Pvalue
ENSMUSG00000031722.11	Hp	haptoglobin	9.7617	0
ENSMUSG00000030546.15	Plin1	perilipin 1	9.49601	0
ENSMUSG00000037071.4	Scd1	stearoyl-Coenzyme A desaturase 1	9.49179	0
ENSMUSG00000018796.14	Acsl1	acyl-CoA synthetase long-chain family member 1	8.18497	0
ENSMUSG00000007097.15	Atp1a2	ATPase, Na+/K+ transporting, alpha 2 polypeptide	8.17035	0
ENSMUSG00000016194.15	Hsd11b1	hydroxysteroid 11-beta dehydrogenase 1	7.15848	0
ENSMUSG00000026473.17	Glul	glutamate-ammonia ligase (glutamine synthetase)	7.04691	0
ENSMUSG00000025509.16	Pnpla2	patatin-like phospholipase domain containing 2	6.90801	0
ENSMUSG00000048040.9	Arxes2	adipocyte-related X-chromosome expressed sequence 2	6.17215	0
ENSMUSG00000031980.11	Agt	angiotensinogen (serpin peptidase inhibitor, clade A, member 8)	6.05532	0
ENSMUSG00000003123.16	Lipe	lipase, hormone sensitive	6.0286	0
ENSMUSG00000026107.12	Nabp1	nucleic acid binding protein 1	5.64012	0
ENSMUSG00000030826.20	Bcat2	branched chain aminotransferase 2, mitochondrial	5.49499	0
ENSMUSG00000020593.17	Lpin1	lipin 1	5.13492	0
ENSMUSG00000026922.14	Agpat2	1-acylglycerol-3-phosphate O-acyltransferase 2 (lysophosphatidic acid acyltransferase, beta)	4.7478	0
ENSMUSG00000060675.14	Plaat3	phospholipase A and acyltransferase 3	4.55624	0
ENSMUSG00000025792.10	Slc25a10	solute carrier family 25 (mitochondrial carrier, dicarboxylate transporter), member 10	4.45196	0
ENSMUSG00000027111.17	Itga6	integrin alpha 6	4.54913	2.31719e-305
ENSMUSG00000027533.11	Fabp5	fatty acid binding protein 5, epidermal	5.18426	2.17375e-299
ENSMUSG00000033096.8	Apmap	adipocyte plasma membrane associated protein	4.43112	1.81715e-290
ENSMUSG00000031373.5	Car5b	carbonic anhydrase 5b, mitochondrial	4.35959	7.3254e-279
ENSMUSG00000000686.12	Abhd15	abhydrolase domain containing 15	6.67912	2.25278e-277
ENSMUSG00000020089.9	Ppa1	pyrophosphatase (inorganic) 1	4.9004	4.00804e-276
ENSMUSG00000074771.11	Ankef1	ankyrin repeat and EF-hand domain containing 1	5.52159	4.28524e-275
ENSMUSG00000007655.17	Cav1	caveolin 1, caveolae protein	4.29716	4.56237e-261
ENSMUSG00000026385.17	Dbi	diazepam binding inhibitor	4.11706	1.22655e-260
ENSMUSG00000021238.12	Aldh6a1	aldehyde dehydrogenase family 6, subfamily A1	4.09685	5.29279e-259
ENSMUSG00000048486.7	Fitm2	fat storage-inducing transmembrane protein 2	4.11214	1.4493e-256
ENSMUSG00000039886.9	Tmem120a	transmembrane protein 120A	4.11723	1.31539e-247
ENSMUSG00000056973.7	Ces1d	carboxylesterase 1D	6.42124	2.15715e-241
ENSMUSG00000003948.18	Mmd	monocyte to macrophage differentiation-associated	4.23609	1.31257e-238
ENSMUSG00000025911.15	Adhfe1	alcohol dehydrogenase, iron containing, 1	6.08634	2.73286e-234
ENSMUSG00000002108.11	Nr1h3	nuclear receptor subfamily 1, group H, member 3	5.83064	3.126e-232
ENSMUSG00000022546.6	Gpt	glutamic pyruvic transaminase, soluble	5.51565	1.66125e-231
ENSMUSG00000026773.20	Pfkfb3	6-phosphofructo-2-kinase/fructose-2,6-biphosphatase 3	4.86559	4.63692e-229
ENSMUSG00000059743.13	Fdps	farnesyl diphosphate synthetase	4.0295	7.46898e-228
ENSMUSG00000022555.13	Dgat1	diacylglycerol O-acyltransferase 1	4.17141	1.43706e-224
ENSMUSG00000020190.14	Mknk2	MAP kinase-interacting serine/threonine kinase 2	3.68302	1.92015e-219
ENSMUSG00000002831.15	Plin4	perilipin 4	3.35879	7.50512e-219
ENSMUSG00000058927.7	Gm10053	cytochrome c, somatic pseudogene	4.35842	2.6751e-218
ENSMUSG00000029314.15	Gpat3	glycerol-3-phosphate acyltransferase 3	7.35806	1.81254e-215
ENSMUSG00000045294.12	Insig1	insulin induced gene 1	3.69059	1.09216e-211
ENSMUSG00000020321.17	Mdh1	malate dehydrogenase 1, NAD (soluble)	3.44482	1.05014e-209
ENSMUSG00000000058.7	Cav2	caveolin 2	3.85651	4.05662e-206
ENSMUSG00000031985.10	Gnpat	glyceronephosphate O-acyltransferase	3.66029	3.75041e-205
ENSMUSG00000005057.14	Sh2b2	SH2B adaptor protein 2	5.43042	1.02691e-204
ENSMUSG00000021792.16	Prxl2a	peroxiredoxin like 2A	5.0477	1.93543e-203
ENSMUSG00000021033.12	Gstz1	glutathione transferase zeta 1 (maleylacetoacetate isomerase)	4.04357	5.1639e-197
ENSMUSG00000030695.17	Aldoa	aldolase A, fructose-bisphosphate	3.31164	3.15984e-195
ENSMUSG00000066687.6	Zbtb16	zinc finger and BTB domain containing 16	4.85328	1.8158e-193
ENSMUSG00000015243.5	Abca1	ATP-binding cassette, sub-family A (ABC1), member 1	3.42142	1.8851e-191
ENSMUSG00000044080.10	S100a1	S100 calcium binding protein A1	5.17726	2.53662e-190
ENSMUSG00000032279.12	Idh3a	isocitrate dehydrogenase 3 (NAD+) alpha	3.58391	3.08396e-190
ENSMUSG00000030711.17	Sult1a1	sulfotransferase family 1A, phenol-preferring, member 1	5.62791	1.07654e-189
ENSMUSG00000044986.11	Tst	thiosulfate sulfurtransferase, mitochondrial	6.35883	5.15302e-189
ENSMUSG00000031725.9	Ces1f	carboxylesterase 1F	7.4965	8.76799e-188
ENSMUSG00000018846.9	Pank3	pantothenate kinase 3	3.37953	3.00353e-187
ENSMUSG00000028792.15	Ak2	adenylate kinase 2	3.48524	1.42228e-185
ENSMUSG00000006641.13	Slc5a6	solute carrier family 5 (sodium-dependent vitamin transporter), member 6	4.26661	1.39765e-182
ENSMUSG00000034957.11	Cebpa	CCAAT/enhancer binding protein (C/EBP), alpha	3.91219	1.46918e-182
ENSMUSG00000016319.4	Slc25a5	solute carrier family 25 (mitochondrial carrier, adenine nucleotide translocator), member 5	3.33053	1.137e-181
ENSMUSG00000019326.15	Aoc3	amine oxidase, copper containing 3	3.93588	1.61213e-181
ENSMUSG00000025153.10	Fasn	fatty acid synthase	3.31093	3.93788e-181
ENSMUSG00000021748.10	Pdhb	pyruvate dehydrogenase (lipoamide) beta	3.6609	1.8918e-179
ENSMUSG00000015568.17	Lpl	lipoprotein lipase	3.39791	5.67953e-176
ENSMUSG00000005683.9	Cs	citrate synthase	3.10001	6.6442e-171
ENSMUSG00000026853.16	Crat	carnitine acetyltransferase	3.2283	4.51431e-169
ENSMUSG00000037709.14	Fam13a	family with sequence similarity 13, member A	3.25114	2.06323e-167
ENSMUSG00000058258.15	Idi1	isopentenyl-diphosphate delta isomerase	3.7764	1.53476e-166
ENSMUSG00000019883.12	Echdc1	enoyl Coenzyme A hydratase domain containing 1	4.02751	8.32463e-166
ENSMUSG00000000440.13	Pparg	peroxisome proliferator activated receptor gamma	3.61822	1.50284e-163
ENSMUSG00000028603.16	Scp2	sterol carrier protein 2, liver	3.31975	9.83342e-163
ENSMUSG00000009394.14	Syn2	synapsin II	8.07148	5.03811e-162
ENSMUSG00000028300.15	C9orf72	C9orf72, member of C9orf72-SMCR8 complex	3.82023	2.00869e-161
ENSMUSG00000018574.15	Acadvl	acyl-Coenzyme A dehydrogenase, very long chain	2.97688	4.51726e-158
ENSMUSG00000040111.18	Gramd1b	GRAM domain containing 1B	2.91234	4.35114e-156
ENSMUSG00000032135.16	Mcam	melanoma cell adhesion molecule	8.34231	9.41181e-156
ENSMUSG00000068747.15	Sort1	sortilin 1	3.35233	1.87176e-154
ENSMUSG00000022040.9	Ephx2	epoxide hydrolase 2, cytoplasmic	3.48022	2.4787e-153
ENSMUSG00000060002.15	Chpt1	choline phosphotransferase 1	3.14639	9.14943e-151
ENSMUSG00000041426.13	Hibch	3-hydroxyisobutyryl-Coenzyme A hydrolase	3.54838	1.66123e-150
ENSMUSG00000025203.7	Scd2	stearoyl-Coenzyme A desaturase 2	2.69842	2.43106e-149
ENSMUSG00000034981.10	Parm1	prostate androgen-regulated mucin-like protein 1	3.91117	2.46322e-149
ENSMUSG00000020023.19	Tmcc3	transmembrane and coiled coil domains 3	4.79122	1.35968e-146
ENSMUSG00000056666.14	Retsat	retinol saturase (all trans retinol 13,14 reductase)	3.15547	1.67686e-145
ENSMUSG00000028737.16	Aldh4a1	aldehyde dehydrogenase 4 family, member A1	3.40934	3.07151e-145
ENSMUSG00000027187.11	Cat	catalase	2.90605	5.56053e-145
ENSMUSG00000025503.6	Taldo1	transaldolase 1	3.42132	1.04785e-143
ENSMUSG00000038462.4	Uqcrfs1	ubiquinol-cytochrome c reductase, Rieske iron-sulfur polypeptide 1	3.50893	1.27674e-143
ENSMUSG00000019179.11	Mdh2	malate dehydrogenase 2, NAD (mitochondrial)	2.81544	5.49105e-143
ENSMUSG00000020085.16	Aifm2	apoptosis-inducing factor, mitochondrion-associated 2	3.50208	9.03473e-143
ENSMUSG00000028405.10	Aco1	aconitase 1	2.88289	6.78078e-142
ENSMUSG00000027332.12	Ivd	isovaleryl coenzyme A dehydrogenase	3.19749	1.1229e-141
ENSMUSG00000009633.4	G0s2	G0/G1 switch gene 2	8.17893	2.79885e-139
ENSMUSG00000020741.18	Cluh	clustered mitochondria (cluA/CLU1) homolog	2.88839	4.36336e-139
ENSMUSG00000020101.15	Vsir	V-set immunoregulatory receptor	7.40777	6.30536e-139
ENSMUSG00000034854.9	Mfsd12	major facilitator superfamily domain containing 12	3.5286	4.64471e-138
ENSMUSG00000037936.16	Scarb1	scavenger receptor class B, member 1	4.43219	5.76298e-138
ENSMUSG00000022797.17	Tfrc	transferrin receptor	3.36435	1.28286e-137
ENSMUSG00000020664.11	Dld	dihydrolipoamide dehydrogenase	2.8405	2.35268e-136
ENSMUSG00000032263.15	Bckdhb	branched chain ketoacid dehydrogenase E1, beta polypeptide	3.34579	5.23156e-136
ENSMUSG00000025393.13	Atp5b	ATP synthase, H+ transporting mitochondrial F1 complex, beta subunit	2.84966	4.34189e-135
ENSMUSG00000048490.15	Nrip1	nuclear receptor interacting protein 1	2.85751	4.81251e-135
ENSMUSG00000025006.19	Sorbs1	sorbin and SH3 domain containing 1	3.63683	5.25634e-135
ENSMUSG00000027195.11	Hsd17b12	hydroxysteroid (17-beta) dehydrogenase 12	2.96759	2.86622e-134
ENSMUSG00000022351.15	Sqle	squalene epoxidase	3.21361	3.80125e-134
ENSMUSG00000024030.8	Abcg1	ATP binding cassette subfamily G member 1	6.48128	8.81294e-133
ENSMUSG00000000628.11	Hk2	hexokinase 2	3.48223	1.10155e-132
ENSMUSG00000032786.17	Alas1	aminolevulinic acid synthase 1	3.17002	1.4901e-132
ENSMUSG00000025980.15	Hspd1	heat shock protein 1 (chaperonin)	2.56349	7.23774e-132
ENSMUSG00000022197.17	Pdzd2	PDZ domain containing 2	4.21029	8.19285e-131
ENSMUSG00000022878.6	Adipoq	adiponectin, C1Q and collagen domain containing	10.8868	6.38151e-130
ENSMUSG00000047446.19	Arl4a	ADP-ribosylation factor-like 4A	4.11602	2.86991e-128
ENSMUSG00000025791.19	Pgm1	phosphoglucomutase 1	2.87433	3.00949e-128
ENSMUSG00000029776.12	Hibadh	3-hydroxyisobutyrate dehydrogenase	2.78141	4.09587e-127
ENSMUSG00000036136.10	Fam110c	family with sequence similarity 110, member C	7.70821	1.12616e-124
ENSMUSG00000020777.17	Acox1	acyl-Coenzyme A oxidase 1, palmitoyl	2.63295	8.36969e-124
ENSMUSG00000028780.14	Sema3c	sema domain, immunoglobulin domain (Ig), short basic domain, secreted, (semaphorin) 3C	-2.70443	4.19993e-123
ENSMUSG00000045954.8	Cavin2	caveolae associated 2	3.25848	8.67001e-122
ENSMUSG00000030884.13	Uqcrc2	ubiquinol cytochrome c reductase core protein 2	2.83701	3.97451e-121
ENSMUSG00000023921.10	Mmut	methylmalonyl-Coenzyme A mutase	3.03838	6.981e-121
ENSMUSG00000003528.16	Slc25a1	solute carrier family 25 (mitochondrial carrier, citrate transporter), member 1	2.95654	7.08505e-121
ENSMUSG00000005514.15	Por	cytochrome p450 oxidoreductase	2.87981	2.96445e-120
ENSMUSG00000015474.17	Ppt2	palmitoyl-protein thioesterase 2	2.97321	1.06095e-119
ENSMUSG00000031530.7	Dusp4	dual specificity phosphatase 4	7.07114	2.20764e-119
ENSMUSG00000059447.14	Hadhb	hydroxyacyl-CoA dehydrogenase trifunctional multienzyme complex subunit beta	2.93299	9.38677e-119
ENSMUSG00000025651.15	Uqcrc1	ubiquinol-cytochrome c reductase core protein 1	2.61804	1.14617e-118
ENSMUSG00000028494.13	Plin2	perilipin 2	2.55919	3.44151e-118
ENSMUSG00000054364.6	Rhob	ras homolog family member B	2.74523	2.46064e-117
ENSMUSG00000003500.14	Impdh1	inosine monophosphate dehydrogenase 1	3.20938	6.31905e-117
ENSMUSG00000005360.15	Slc1a3	solute carrier family 1 (glial high affinity glutamate transporter), member 3	2.66041	7.58332e-117
ENSMUSG00000022477.14	Aco2	aconitase 2, mitochondrial	2.60248	1.23053e-116
ENSMUSG00000027809.15	Etfdh	electron transferring flavoprotein, dehydrogenase	2.88809	2.09695e-116
ENSMUSG00000034926.4	Dhcr24	24-dehydrocholesterol reductase	3.11569	2.75462e-116
ENSMUSG00000027406.14	Idh3b	isocitrate dehydrogenase 3 (NAD+) beta	2.69258	8.4382e-116
ENSMUSG00000039640.8	Mrpl12	mitochondrial ribosomal protein L12	3.01524	1.00853e-115
ENSMUSG00000020572.9	Nampt	nicotinamide phosphoribosyltransferase	2.69736	2.74231e-115
ENSMUSG00000059811.14	Atl2	atlastin GTPase 2	2.81318	3.2307e-115
ENSMUSG00000028967.11	Errfi1	ERBB receptor feedback inhibitor 1	3.04029	2.7551e-114
ENSMUSG00000049265.9	Kcnk3	potassium channel, subfamily K, member 3	5.79168	2.8592e-114
ENSMUSG00000063694.6	Cycs	cytochrome c, somatic	3.40249	1.58655e-113
ENSMUSG00000062908.13	Acadm	acyl-Coenzyme A dehydrogenase, medium chain	2.86937	3.89815e-113
ENSMUSG00000046324.13	Ermp1	endoplasmic reticulum metallopeptidase 1	2.73936	9.89387e-113
ENSMUSG00000042688.17	Mapk6	mitogen-activated protein kinase 6	2.71161	1.04974e-112
ENSMUSG00000052337.16	Immt	inner membrane protein, mitochondrial	2.50011	1.39311e-112
ENSMUSG00000008206.17	Cers4	ceramide synthase 4	2.85194	1.47816e-112
ENSMUSG00000046056.16	Sbsn	suprabasin	4.84452	1.84466e-112
ENSMUSG00000030029.15	Lrig1	leucine-rich repeats and immunoglobulin-like domains 1	2.71274	2.57677e-112
ENSMUSG00000024972.17	Lgals12	lectin, galactose binding, soluble 12	8.33622	3.10347e-112
ENSMUSG00000022186.15	Oxct1	3-oxoacid CoA transferase 1	2.63824	4.77842e-112
ENSMUSG00000027322.12	Siglec1	sialic acid binding Ig-like lectin 1, sialoadhesin	4.70028	1.00881e-111
ENSMUSG00000031349.5	Nsdhl	NAD(P) dependent steroid dehydrogenase-like	3.36991	1.32615e-109
ENSMUSG00000001739.15	Cldn15	claudin 15	2.82441	2.76107e-109
ENSMUSG00000009281.7	Rarres2	retinoic acid receptor responder (tazarotene induced) 2	3.55881	4.74909e-109
ENSMUSG00000078566.9	Bnip3	BCL2/adenovirus E1B interacting protein 3	2.9413	2.24492e-108
ENSMUSG00000028607.17	Cpt2	carnitine palmitoyltransferase 2	3.05557	2.48455e-108
ENSMUSG00000014077.14	Chp1	calcineurin-like EF hand protein 1	2.57826	4.93223e-108
ENSMUSG00000032332.18	Col12a1	collagen, type XII, alpha 1	-2.55693	2.12203e-107
ENSMUSG00000030545.10	Pex11a	peroxisomal biogenesis factor 11 alpha	4.04427	6.21235e-107
ENSMUSG00000052974.9	Cyp2f2	cytochrome P450, family 2, subfamily f, polypeptide 2	5.5361	1.49338e-106
ENSMUSG00000000399.11	Ndufa9	NADH:ubiquinone oxidoreductase subunit A9	2.61482	1.9493e-106
ENSMUSG00000021273.12	Fdft1	farnesyl diphosphate farnesyl transferase 1	3.15795	5.43454e-106
ENSMUSG00000025968.17	Ndufs1	NADH:ubiquinone oxidoreductase core subunit S1	2.70484	5.79348e-106
ENSMUSG00000043122.8	A530016L24Rik	RIKEN cDNA A530016L24 gene	9.91288	2.2355e-105
ENSMUSG00000031604.11	Msmo1	methylsterol monoxygenase 1	2.72706	5.07489e-105
ENSMUSG00000008540.12	Mgst1	microsomal glutathione S-transferase 1	2.62921	9.94712e-105
ENSMUSG00000002997.16	Prkar2b	protein kinase, cAMP dependent regulatory, type II beta	2.67216	1.92626e-104
ENSMUSG00000045102.13	Poln	DNA polymerase N	7.26316	7.8357e-104
ENSMUSG00000023832.15	Acat2	acetyl-Coenzyme A acetyltransferase 2	2.69647	7.70921e-103
ENSMUSG00000030671.10	Pde3b	phosphodiesterase 3B, cGMP-inhibited	2.98984	1.85158e-102
ENSMUSG00000029838.12	Ptn	pleiotrophin	-2.47128	2.95734e-102
ENSMUSG00000028121.9	Bcar3	breast cancer anti-estrogen resistance 3	3.76462	4.19928e-102
ENSMUSG00000052738.15	Suclg1	succinate-CoA ligase, GDP-forming, alpha subunit	2.52626	7.63122e-101
ENSMUSG00000054434.15	Tmem120b	transmembrane protein 120B	3.90428	1.29378e-100
ENSMUSG00000022551.9	Cyc1	cytochrome c-1	2.77159	5.40909e-100
ENSMUSG00000029545.14	Acads	acyl-Coenzyme A dehydrogenase, short chain	2.94255	1.25048e-99
ENSMUSG00000022508.6	Bcl6	B cell leukemia/lymphoma 6	3.56328	5.94929e-99
ENSMUSG00000026858.19	Miga2	mitoguardin 2	2.88285	6.63796e-99
ENSMUSG00000026576.13	Atp1b1	ATPase, Na+/K+ transporting, beta 1 polypeptide	-3.55134	6.71045e-99
ENSMUSG00000030246.13	Ldhb	lactate dehydrogenase B	2.61146	7.53567e-99
ENSMUSG00000028551.15	Cdkn2c	cyclin dependent kinase inhibitor 2C	2.96478	2.84457e-98
ENSMUSG00000044894.15	Uqcrq	ubiquinol-cytochrome c reductase, complex III subunit VII	2.73829	3.46459e-98
ENSMUSG00000032702.17	Kank1	KN motif and ankyrin repeat domains 1	3.60166	1.42993e-97
ENSMUSG00000029998.15	Pcyox1	prenylcysteine oxidase 1	2.43099	1.56444e-97
ENSMUSG00000058624.14	Gda	guanine deaminase	3.40312	5.48508e-97
ENSMUSG00000026360.10	Rgs2	regulator of G-protein signaling 2	2.97837	1.443e-96
ENSMUSG00000062991.10	Nrg1	neuregulin 1	-2.60618	1.83387e-96
ENSMUSG00000086784.3	Isoc2a	isochorismatase domain containing 2a	3.59307	5.08227e-96
ENSMUSG00000054676.18	1600014C10Rik	RIKEN cDNA 1600014C10 gene	2.78484	8.11019e-96
ENSMUSG00000028383.18	Hsdl2	hydroxysteroid dehydrogenase like 2	2.862	7.74163e-95
ENSMUSG00000000876.12	Pxmp4	peroxisomal membrane protein 4	2.59741	8.62155e-95
ENSMUSG00000025150.11	Cbr2	carbonyl reductase 2	4.16554	1.1648e-94
ENSMUSG00000021390.7	Ogn	osteoglycin	-2.68517	1.80836e-94
ENSMUSG00000027204.14	Fbn1	fibrillin 1	-2.23437	4.88736e-94
ENSMUSG00000029093.15	Sorcs2	sortilin-related VPS10 domain containing receptor 2	-3.03324	1.01421e-93
ENSMUSG00000041733.11	Coq5	coenzyme Q5 methyltransferase	2.81069	5.38453e-93
ENSMUSG00000023885.10	Thbs2	thrombospondin 2	-2.19512	1.73957e-92
ENSMUSG00000021957.8	Tkt	transketolase	2.3781	2.25727e-92
ENSMUSG00000027709.10	Mccc1	methylcrotonoyl-Coenzyme A carboxylase 1 (alpha)	2.81011	5.22829e-92
ENSMUSG00000026688.6	Mgst3	microsomal glutathione S-transferase 3	2.86042	1.99132e-91
ENSMUSG00000029661.17	Col1a2	collagen, type I, alpha 2	-2.07549	1.35299e-90
ENSMUSG00000058454.16	Dhcr7	7-dehydrocholesterol reductase	3.06797	2.30169e-89
ENSMUSG00000003526.13	Prodh	proline dehydrogenase	8.32611	2.54113e-89
ENSMUSG00000023861.18	Mpc1	mitochondrial pyruvate carrier 1	2.71171	4.00524e-89
ENSMUSG00000046275.3	Trarg1	trafficking regulator of GLUT4 (SLC2A4) 1	3.64305	4.50319e-89
ENSMUSG00000035376.11	Hacd2	3-hydroxyacyl-CoA dehydratase 2	2.8819	9.22392e-89
ENSMUSG00000025465.14	Echs1	enoyl Coenzyme A hydratase, short chain, 1, mitochondrial	2.46114	1.32698e-88
ENSMUSG00000035504.17	Reep6	receptor accessory protein 6	5.55595	2.69004e-88
ENSMUSG00000032540.17	Abhd5	abhydrolase domain containing 5	2.43326	3.28693e-88
ENSMUSG00000030751.19	Psma1	proteasome subunit alpha 1	2.43888	1.09726e-87
ENSMUSG00000020532.19	Acaca	acetyl-Coenzyme A carboxylase alpha	2.34896	5.03598e-87
ENSMUSG00000010914.11	Pdhx	pyruvate dehydrogenase complex, component X	2.69045	5.44764e-87
ENSMUSG00000020456.18	Ogdh	oxoglutarate (alpha-ketoglutarate) dehydrogenase (lipoamide)	2.2763	1.92465e-86
ENSMUSG00000064105.14	Cnnm2	cyclin M2	2.72434	2.45674e-86
ENSMUSG00000032193.10	Ldlr	low density lipoprotein receptor	2.83723	2.51438e-86
ENSMUSG00000037206.16	Islr	immunoglobulin superfamily containing leucine-rich repeat	-2.6114	2.75926e-86
ENSMUSG00000025202.9	Scd3	stearoyl-coenzyme A desaturase 3	6.49411	8.58327e-86
ENSMUSG00000039976.5	Tbc1d16	TBC1 domain family, member 16	2.50746	1.80556e-85
ENSMUSG00000036932.15	Aifm1	apoptosis-inducing factor, mitochondrion-associated 1	2.60657	1.96746e-85
ENSMUSG00000022947.9	Cbr3	carbonyl reductase 3	2.93115	2.37348e-85
ENSMUSG00000028223.9	Decr1	2,4-dienoyl CoA reductase 1, mitochondrial	2.4555	4.04681e-85
ENSMUSG00000002944.16	Cd36	CD36 molecule	11.6724	4.71336e-85
ENSMUSG00000026819.16	Slc25a25	solute carrier family 25 (mitochondrial carrier, phosphate carrier), member 25	3.37715	5.22162e-85
ENSMUSG00000031400.11	G6pdx	glucose-6-phosphate dehydrogenase X-linked	2.45649	5.63709e-85
ENSMUSG00000060376.8	Bckdha	branched chain ketoacid dehydrogenase E1, alpha polypeptide	2.90895	1.41273e-84
ENSMUSG00000037493.7	Cib2	calcium and integrin binding family member 2	3.69291	4.16758e-84
ENSMUSG00000030747.6	Dgat2	diacylglycerol O-acyltransferase 2	8.33048	4.49528e-84
ENSMUSG00000027750.17	Postn	periostin, osteoblast specific factor	-2.12144	5.56511e-84
ENSMUSG00000035828.12	Pim3	proviral integration site 3	2.76107	6.02207e-84
ENSMUSG00000023909.5	Paqr4	progestin and adipoQ receptor family member IV	2.77498	1.55132e-83
ENSMUSG00000025732.7	Mcrip2	MAPK regulated corepressor interacting protein 2	4.36462	1.62044e-83
ENSMUSG00000026675.13	Hsd17b7	hydroxysteroid (17-beta) dehydrogenase 7	2.95457	2.30833e-83
ENSMUSG00000005124.11	Ccn4	cellular communication network factor 4	-2.61395	2.85429e-83
ENSMUSG00000073490.12	Ifi207	interferon activated gene 207	5.27244	1.1188e-82
ENSMUSG00000001300.17	Efnb2	ephrin B2	-3.12277	4.34462e-82
ENSMUSG00000027222.15	Pex16	peroxisomal biogenesis factor 16	2.94668	6.02583e-82
ENSMUSG00000027774.17	Gfm1	G elongation factor, mitochondrial 1	2.50726	4.69422e-81
ENSMUSG00000000340.11	Dbt	dihydrolipoamide branched chain transacylase E2	3.57831	1.9648e-80
ENSMUSG00000063406.12	Tmed5	transmembrane p24 trafficking protein 5	2.46188	3.07488e-80
ENSMUSG00000057137.10	Tmem140	transmembrane protein 140	2.8065	3.30566e-80
ENSMUSG00000040061.18	Plcb2	phospholipase C, beta 2	8.46929	3.78226e-80
ENSMUSG00000037110.21	Ralgapa2	Ral GTPase activating protein, alpha subunit 2 (catalytic)	2.85318	4.37627e-80
ENSMUSG00000024997.8	Prdx3	peroxiredoxin 3	2.33425	6.33384e-80
ENSMUSG00000024427.8	Spry4	sprouty RTK signaling antagonist 4	3.25056	9.64325e-80
ENSMUSG00000046743.7	Fat4	FAT atypical cadherin 4	-2.10064	3.262e-79
ENSMUSG00000090150.11	Acad11	acyl-Coenzyme A dehydrogenase family, member 11	2.63558	3.93826e-79
ENSMUSG00000005268.21	Prlr	prolactin receptor	4.82312	8.12636e-79
ENSMUSG00000037916.15	Ndufv1	NADH:ubiquinone oxidoreductase core subunit V1	2.24726	2.22314e-78
ENSMUSG00000031924.5	Cyb5b	cytochrome b5 type B	2.1171	3.49378e-78
ENSMUSG00000021950.16	Anxa8	annexin A8	3.75206	5.8921e-78
ENSMUSG00000025479.10	Cyp2e1	cytochrome P450, family 2, subfamily e, polypeptide 1	9.3679	9.37802e-78
ENSMUSG00000029669.15	Tspan12	tetraspanin 12	3.47687	1.02882e-77
ENSMUSG00000032058.15	Ppp2r1b	protein phosphatase 2, regulatory subunit A, beta	2.4389	2.9438e-77
ENSMUSG00000026043.19	Col3a1	collagen, type III, alpha 1	-2.43946	3.80988e-77
ENSMUSG00000033107.7	Rnf125	ring finger protein 125	4.57103	6.39429e-77
ENSMUSG00000001467.6	Cyp51	cytochrome P450, family 51	2.4514	7.46273e-77
ENSMUSG00000021474.10	Sfxn1	sideroflexin 1	2.48923	2.49702e-76
ENSMUSG00000002985.17	Apoe	apolipoprotein E	3.22497	3.85907e-76
ENSMUSG00000033149.18	Phldb2	pleckstrin homology like domain, family B, member 2	-2.41961	5.589e-76
ENSMUSG00000000753.16	Serpinf1	serine (or cysteine) peptidase inhibitor, clade F, member 1	-2.09624	1.90533e-75
ENSMUSG00000061273.4	Mmgt1	membrane magnesium transporter 1	2.4668	2.15655e-75
ENSMUSG00000024501.21	Dpysl3	dihydropyrimidinase-like 3	-2.11374	3.96841e-75
ENSMUSG00000029482.5	Aacs	acetoacetyl-CoA synthetase	2.26284	5.89305e-75
ENSMUSG00000027605.19	Acss2	acyl-CoA synthetase short-chain family member 2	2.91191	9.65748e-75
ENSMUSG00000033350.8	Chst2	carbohydrate sulfotransferase 2	-2.63735	1.12342e-74
ENSMUSG00000041028.17	Ghitm	growth hormone inducible transmembrane protein	2.12713	1.865e-74
ENSMUSG00000020163.13	Uqcr11	ubiquinol-cytochrome c reductase, complex III subunit XI	2.85787	2.38273e-74
ENSMUSG00000001918.18	Slc1a5	solute carrier family 1 (neutral amino acid transporter), member 5	2.31528	6.02377e-74
ENSMUSG00000004789.11	Dlst	dihydrolipoamide S-succinyltransferase (E2 component of 2-oxo-glutarate complex)	2.02175	6.89676e-74
ENSMUSG00000024646.15	Cyb5a	cytochrome b5 type A (microsomal)	2.14245	1.45765e-73
ENSMUSG00000026820.6	Ptges2	prostaglandin E synthase 2	2.71242	2.15142e-73
ENSMUSG00000050335.18	Lgals3	lectin, galactose binding, soluble 3	2.58332	2.91181e-73
ENSMUSG00000024222.18	Fkbp5	FK506 binding protein 5	2.84137	5.60425e-73
ENSMUSG00000019817.19	Plagl1	pleiomorphic adenoma gene-like 1	-3.68566	6.00862e-73
ENSMUSG00000027282.18	Mtch2	mitochondrial carrier 2	2.14345	1.56081e-72
ENSMUSG00000032366.16	Tpm1	tropomyosin 1, alpha	-1.98163	6.58284e-72
ENSMUSG00000037573.6	Tob1	transducer of ErbB-2.1	2.54478	7.06415e-72
ENSMUSG00000009863.15	Sdhb	succinate dehydrogenase complex, subunit B, iron sulfur (Ip)	2.45588	8.17548e-72
ENSMUSG00000037242.9	Clic4	chloride intracellular channel 4 (mitochondrial)	2.41005	1.52954e-71
ENSMUSG00000014905.5	Dnajb9	DnaJ heat shock protein family (Hsp40) member B9	2.54757	3.2836e-71
ENSMUSG00000003865.17	Gys1	glycogen synthase 1, muscle	2.18919	4.70375e-71
ENSMUSG00000034714.10	Ttyh2	tweety family member 2	2.37627	1.80558e-70
ENSMUSG00000001506.11	Col1a1	collagen, type I, alpha 1	-2.43702	2.29062e-70
ENSMUSG00000000168.11	Dlat	dihydrolipoamide S-acetyltransferase (E2 component of pyruvate dehydrogenase complex)	2.21521	4.93343e-70
ENSMUSG00000020183.12	Cpm	carboxypeptidase M	4.09647	7.09218e-70
ENSMUSG00000018326.10	Ywhab	tyrosine 3-monooxygenase/tryptophan 5-monooxygenase activation protein, beta polypeptide	2.57386	7.74345e-70
ENSMUSG00000020256.15	Aldh1l2	aldehyde dehydrogenase 1 family, member L2	-2.48956	3.11146e-69
ENSMUSG00000036257.16	Pnpla8	patatin-like phospholipase domain containing 8	2.04475	3.91582e-69
ENSMUSG00000054640.16	Slc8a1	solute carrier family 8 (sodium/calcium exchanger), member 1	-2.20721	2.69326e-68
ENSMUSG00000029406.16	Pitpnm2	phosphatidylinositol transfer protein, membrane-associated 2	2.55592	7.88236e-68
ENSMUSG00000025428.16	Atp5a1	ATP synthase, H+ transporting, mitochondrial F1 complex, alpha subunit 1	1.93787	1.15088e-67
ENSMUSG00000073481.10	Mtarc2	mitochondrial amidoxime reducing component 2	2.63657	1.65933e-67
ENSMUSG00000066026.15	Dhrs3	dehydrogenase/reductase (SDR family) member 3	3.11902	2.16145e-67
ENSMUSG00000026208.10	Des	desmin	4.69059	2.33211e-67
ENSMUSG00000071711.13	Mpst	mercaptopyruvate sulfurtransferase	2.83589	2.69829e-67
ENSMUSG00000017754.14	Pltp	phospholipid transfer protein	-2.28865	4.57225e-67
ENSMUSG00000028427.14	Aqp7	aquaporin 7	3.72993	5.81868e-67
ENSMUSG00000026193.16	Fn1	fibronectin 1	-1.75725	3.33746e-66
ENSMUSG00000005510.10	Ndufs3	NADH:ubiquinone oxidoreductase core subunit S3	2.21038	4.57478e-66
ENSMUSG00000031432.4	Prps1	phosphoribosyl pyrophosphate synthetase 1	3.01118	8.48132e-66
ENSMUSG00000042436.13	Mfap4	microfibrillar-associated protein 4	-3.94037	1.21481e-65
ENSMUSG00000027952.17	Pmvk	phosphomevalonate kinase	3.50548	1.81449e-65
ENSMUSG00000031360.15	Ctps2	cytidine 5'-triphosphate synthase 2	2.12142	3.08505e-65
ENSMUSG00000021559.15	Dapk1	death associated protein kinase 1	2.53345	3.50019e-65
ENSMUSG00000040564.15	Apoc1	apolipoprotein C-I	6.90406	3.69048e-65
ENSMUSG00000033526.17	Ppip5k1	diphosphoinositol pentakisphosphate kinase 1	2.33275	5.12208e-65
ENSMUSG00000036078.17	Sigmar1	sigma non-opioid intracellular receptor 1	2.17022	6.57177e-65
ENSMUSG00000059534.9	Uqcr10	ubiquinol-cytochrome c reductase, complex III subunit X	2.27138	1.49557e-64
ENSMUSG00000013593.13	Ndufs2	NADH:ubiquinone oxidoreductase core subunit S2	2.18286	1.79017e-64
ENSMUSG00000021577.15	Sdha	succinate dehydrogenase complex, subunit A, flavoprotein (Fp)	1.92752	4.50242e-64
ENSMUSG00000061518.12	Cox5b	cytochrome c oxidase subunit 5B	2.27795	6.89699e-64
ENSMUSG00000027637.4	Rab5if	RAB5 interacting factor	2.18069	7.1184e-64
ENSMUSG00000028961.16	Pgd	phosphogluconate dehydrogenase	2.18265	7.21418e-64
ENSMUSG00000002550.17	Uck1	uridine-cytidine kinase 1	2.18406	7.33099e-64
ENSMUSG00000018770.10	Atp5g3	ATP synthase, H+ transporting, mitochondrial F0 complex, subunit C3 (subunit 9)	2.11643	1.13486e-63
ENSMUSG00000031093.15	Dock11	dedicator of cytokinesis 11	2.39144	1.36405e-63
ENSMUSG00000029413.15	Naaa	N-acylethanolamine acid amidase	2.24846	2.50343e-63
ENSMUSG00000030986.14	Dhx32	DEAH (Asp-Glu-Ala-His) box polypeptide 32	2.76112	3.28583e-63
ENSMUSG00000033420.13	Antxr1	anthrax toxin receptor 1	-1.86533	3.44006e-63
ENSMUSG00000020053.19	Igf1	insulin-like growth factor 1	-2.55514	5.43623e-63
ENSMUSG00000027559.6	Car3	carbonic anhydrase 3	7.23479	9.6253e-63
ENSMUSG00000041797.8	Abca9	ATP-binding cassette, sub-family A (ABC1), member 9	-2.78723	1.98896e-62
ENSMUSG00000061436.16	Hipk2	homeodomain interacting protein kinase 2	2.47577	6.30969e-62
ENSMUSG00000037112.17	Sik2	salt inducible kinase 2	2.02257	6.98006e-62
ENSMUSG00000040856.18	Dlk1	delta like non-canonical Notch ligand 1	-1.95555	7.20796e-62
ENSMUSG00000091243.3	Vgll3	vestigial like family member 3	-2.01991	8.75606e-62
ENSMUSG00000005981.12	Trap1	TNF receptor-associated protein 1	1.98718	9.80884e-62
ENSMUSG00000028557.11	Rnf11	ring finger protein 11	1.94386	1.1172e-61
ENSMUSG00000030208.16	Emp1	epithelial membrane protein 1	-2.31328	1.30353e-61
ENSMUSG00000022346.18	Myc	myelocytomatosis oncogene	2.87345	1.55549e-61
ENSMUSG00000044674.7	Fzd1	frizzled class receptor 1	-1.96949	1.88517e-61
ENSMUSG00000070738.11	Dgkd	diacylglycerol kinase, delta	2.09244	2.41703e-61
ENSMUSG00000035686.9	Thrsp	thyroid hormone responsive	13.888	2.56024e-61
ENSMUSG00000034424.6	Gcsh	glycine cleavage system protein H (aminomethyl carrier)	2.26758	2.91756e-61
ENSMUSG00000029772.18	Ahcyl2	S-adenosylhomocysteine hydrolase-like 2	2.117	3.40978e-61
ENSMUSG00000074364.7	Ehd2	EH-domain containing 2	1.75989	3.60187e-61
ENSMUSG00000004270.14	Lpcat3	lysophosphatidylcholine acyltransferase 3	2.21793	1.12317e-60
ENSMUSG00000024845.20	Tmem134	transmembrane protein 134	2.13402	1.34979e-60
ENSMUSG00000022013.5	Dnajc15	DnaJ heat shock protein family (Hsp40) member C15	3.14848	1.41641e-60
ENSMUSG00000041697.9	Cox6a1	cytochrome c oxidase subunit 6A1	2.10645	1.59339e-60
ENSMUSG00000027068.7	Dhrs9	dehydrogenase/reductase (SDR family) member 9	3.34329	1.61219e-60
ENSMUSG00000024140.11	Epas1	endothelial PAS domain protein 1	2.53577	1.80156e-60
ENSMUSG00000035885.6	Cox8a	cytochrome c oxidase subunit 8A	1.95078	2.00808e-60
ENSMUSG00000004610.5	Etfb	electron transferring flavoprotein, beta polypeptide	2.22772	2.01135e-60
ENSMUSG00000041688.17	Amot	angiomotin	-1.98686	3.06158e-60
ENSMUSG00000051391.10	Ywhag	tyrosine 3-monooxygenase/tryptophan 5-monooxygenase activation protein, gamma polypeptide	1.77869	4.69877e-60
ENSMUSG00000045636.17	Mtus1	mitochondrial tumor suppressor 1	2.24849	5.17674e-60
ENSMUSG00000033022.9	Cdo1	cysteine dioxygenase 1, cytosolic	2.46621	5.34916e-60
ENSMUSG00000029198.4	Grpel1	GrpE-like 1, mitochondrial	2.11507	7.6804e-60
ENSMUSG00000073838.11	Tufm	Tu translation elongation factor, mitochondrial	2.20051	1.25416e-59
ENSMUSG00000024529.15	Lox	lysyl oxidase	-1.68991	1.57656e-59
ENSMUSG00000021091.9	Serpina3n	serine (or cysteine) peptidase inhibitor, clade A, member 3N	3.96262	1.79882e-59
ENSMUSG00000007480.6	Mc5r	melanocortin 5 receptor	7.47975	1.98418e-59
ENSMUSG00000038344.15	Txlng	taxilin gamma	2.27135	2.93218e-59
ENSMUSG00000002010.18	Idh3g	isocitrate dehydrogenase 3 (NAD+), gamma	2.25346	7.23407e-59
ENSMUSG00000047866.21	Lonp2	lon peptidase 2, peroxisomal	1.80215	7.9262e-59
ENSMUSG00000006800.15	Sulf2	sulfatase 2	-2.24139	1.0027e-58
ENSMUSG00000042569.14	Dhrs7b	dehydrogenase/reductase (SDR family) member 7B	2.41492	1.17686e-58
ENSMUSG00000029108.15	Pcdh7	protocadherin 7	-2.18857	1.19407e-58
ENSMUSG00000030087.12	Klf15	Kruppel-like factor 15	9.16437	1.50358e-58
ENSMUSG00000020377.16	Ltc4s	leukotriene C4 synthase	4.80431	2.86931e-58
ENSMUSG00000064120.15	Mocs1	molybdenum cofactor synthesis 1	2.04908	3.50439e-58
ENSMUSG00000051483.10	Cbr1	carbonyl reductase 1	2.41861	5.05739e-58
ENSMUSG00000076435.4	Acsf2	acyl-CoA synthetase family member 2	2.14832	1.77619e-57
ENSMUSG00000033576.13	Apol6	apolipoprotein L 6	4.19532	1.93863e-57
ENSMUSG00000069662.6	Marcks	myristoylated alanine rich protein kinase C substrate	-1.78658	4.81593e-57
ENSMUSG00000056938.17	Acbd4	acyl-Coenzyme A binding domain containing 4	2.30636	5.2263e-57
ENSMUSG00000051225.10	Fam83a	family with sequence similarity 83, member A	7.72537	5.72155e-57
ENSMUSG00000075296.6	Aldh3b2	aldehyde dehydrogenase 3 family, member B2	5.10929	5.84461e-57
ENSMUSG00000028430.15	Nol6	nucleolar protein family 6 (RNA-associated)	2.00127	6.18554e-57
ENSMUSG00000031818.13	Cox4i1	cytochrome c oxidase subunit 4I1	2.01057	6.32922e-57
ENSMUSG00000019082.19	Slc25a22	solute carrier family 25 (mitochondrial carrier, glutamate), member 22	2.92184	1.29529e-56
ENSMUSG00000068874.14	Selenbp1	selenium binding protein 1	4.41065	1.42956e-56
ENSMUSG00000033174.18	Mgll	monoglyceride lipase	5.72518	1.56012e-56
ENSMUSG00000093930.3	Hmgcs1	3-hydroxy-3-methylglutaryl-Coenzyme A synthase 1	1.92832	1.92329e-56
ENSMUSG00000026198.16	Abcb6	ATP-binding cassette, sub-family B (MDR/TAP), member 6	2.73622	2.1732e-56
ENSMUSG00000025745.13	Hadha	hydroxyacyl-CoA dehydrogenase trifunctional multienzyme complex subunit alpha	1.84629	2.40081e-56
ENSMUSG00000028982.10	Slc25a33	solute carrier family 25, member 33	3.61762	3.44006e-56
ENSMUSG00000022816.12	Fstl1	follistatin-like 1	-1.76842	4.02992e-56
ENSMUSG00000025545.11	Clybl	citrate lyase beta like	2.71328	4.2738e-56
ENSMUSG00000000171.6	Sdhd	succinate dehydrogenase complex, subunit D, integral membrane protein	2.05611	4.54326e-56
ENSMUSG00000033845.14	Mrpl15	mitochondrial ribosomal protein L15	2.31605	5.56361e-56
ENSMUSG00000030861.16	Acadsb	acyl-Coenzyme A dehydrogenase, short/branched chain	1.82411	5.83478e-56
ENSMUSG00000013483.15	Card14	caspase recruitment domain family, member 14	7.51454	7.09003e-56
ENSMUSG00000030257.17	Srgap3	SLIT-ROBO Rho GTPase activating protein 3	-2.11581	7.6868e-56
ENSMUSG00000044405.5	Adig	adipogenin	9.53166	3.68989e-55
ENSMUSG00000027253.16	Lrp4	low density lipoprotein receptor-related protein 4	-2.78111	4.01217e-55
ENSMUSG00000026827.13	Gpd2	glycerol phosphate dehydrogenase 2, mitochondrial	2.37246	4.80952e-55
ENSMUSG00000026674.10	Ddr2	discoidin domain receptor family, member 2	-1.66704	4.8792e-55
ENSMUSG00000062515.4	Fabp4	fatty acid binding protein 4, adipocyte	11.3262	6.0968e-55
ENSMUSG00000023992.15	Trem2	triggering receptor expressed on myeloid cells 2	7.26512	1.72469e-54
ENSMUSG00000049409.10	Prokr1	prokineticin receptor 1	-3.82607	2.72504e-54
ENSMUSG00000027901.13	Dennd2d	DENN/MADD domain containing 2D	4.459	2.97379e-54
ENSMUSG00000029718.15	Pcolce	procollagen C-endopeptidase enhancer protein	-1.76916	3.38057e-54
ENSMUSG00000027618.18	Nfs1	nitrogen fixation gene 1 (S. cerevisiae)	2.13056	5.72863e-54
ENSMUSG00000024099.16	Ndufv2	NADH:ubiquinone oxidoreductase core subunit V2	2.04221	8.24304e-54
ENSMUSG00000040105.4	Plpp6	phospholipid phosphatase 6	2.4077	9.09295e-54
ENSMUSG00000022110.14	Sucla2	succinate-Coenzyme A ligase, ADP-forming, beta subunit	1.94548	1.18404e-53
ENSMUSG00000027961.8	Lrrc39	leucine rich repeat containing 39	6.35075	1.68176e-53
ENSMUSG00000001755.13	Coasy	Coenzyme A synthase	2.30449	1.83578e-53
ENSMUSG00000042302.15	Ehbp1	EH domain binding protein 1	-1.91018	2.14516e-53
ENSMUSG00000028359.5	Orm3	orosomucoid 3	6.99026	2.33814e-53
ENSMUSG00000000563.18	Atp5pb	ATP synthase peripheral stalk-membrane subunit b	1.85268	2.55824e-53
ENSMUSG00000025204.11	Ndufb8	NADH:ubiquinone oxidoreductase subunit B8	2.16129	3.21866e-53
ENSMUSG00000037455.17	Slc18b1	solute carrier family 18, subfamily B, member 1	2.39891	4.09911e-53
ENSMUSG00000029843.5	Slc13a4	solute carrier family 13 (sodium/sulfate symporters), member 4	6.08071	5.49021e-53
ENSMUSG00000026260.13	Ndufa10	NADH:ubiquinone oxidoreductase subunit A10	2.25547	6.69146e-53
ENSMUSG00000026568.7	Mpc2	mitochondrial pyruvate carrier 2	2.43165	9.14288e-53
ENSMUSG00000032418.16	Me1	malic enzyme 1, NADP(+)-dependent, cytosolic	2.27257	1.19637e-52
ENSMUSG00000035764.6	Fbxo45	F-box protein 45	2.27732	1.59254e-52
ENSMUSG00000010609.16	Psen2	presenilin 2	2.60812	2.28982e-52
ENSMUSG00000003072.16	Atp5d	ATP synthase, H+ transporting, mitochondrial F1 complex, delta subunit	2.09778	2.63316e-52
ENSMUSG00000025784.6	Clec3b	C-type lectin domain family 3, member b	-2.35086	2.67552e-52
ENSMUSG00000015053.15	Gata2	GATA binding protein 2	-4.18193	3.80075e-52
ENSMUSG00000042035.12	Igsf3	immunoglobulin superfamily, member 3	-2.03474	4.52383e-52
ENSMUSG00000022354.5	Ndufb9	NADH:ubiquinone oxidoreductase subunit B9	2.01398	5.82887e-52
ENSMUSG00000020473.14	Aebp1	AE binding protein 1	-1.95952	1.28327e-51
ENSMUSG00000024043.14	Arhgap28	Rho GTPase activating protein 28	-2.02588	1.68916e-51
ENSMUSG00000021868.8	Ppif	peptidylprolyl isomerase F (cyclophilin F)	2.53804	1.81528e-51
ENSMUSG00000020422.15	Tns3	tensin 3	-1.68017	2.22372e-51
ENSMUSG00000064080.13	Fbln2	fibulin 2	-1.69681	2.53246e-51
ENSMUSG00000038845.12	Phb	prohibitin	2.08984	3.6893e-51
ENSMUSG00000033684.15	Qsox1	quiescin Q6 sulfhydryl oxidase 1	1.71035	5.94179e-51
ENSMUSG00000048355.3	Arxes1	adipocyte-related X-chromosome expressed sequence 1	6.7465	6.55353e-51
ENSMUSG00000023019.13	Gpd1	glycerol-3-phosphate dehydrogenase 1 (soluble)	11.1068	8.47035e-51
ENSMUSG00000002984.18	Tomm40	translocase of outer mitochondrial membrane 40	2.08932	1.09549e-50
ENSMUSG00000031673.7	Cdh11	cadherin 11	-1.59747	1.13582e-50
ENSMUSG00000058076.13	Sdhc	succinate dehydrogenase complex, subunit C, integral membrane protein	1.90231	1.23957e-50
ENSMUSG00000050549.9	Fam241a	family with sequence similarity 241, member A	4.78957	1.44281e-50
ENSMUSG00000019528.19	Gyg	glycogenin	2.26779	2.22063e-50
ENSMUSG00000063558.5	Aox1	aldehyde oxidase 1	2.6062	2.3758e-50
ENSMUSG00000022099.18	Dmtn	dematin actin binding protein	3.53753	4.67111e-50
ENSMUSG00000049091.8	Sephs2	selenophosphate synthetase 2	2.47106	4.98553e-50
ENSMUSG00000037892.14	Pcdh18	protocadherin 18	-1.99369	5.55813e-50
ENSMUSG00000056481.8	Cd248	CD248 antigen, endosialin	-1.87952	9.79973e-50
ENSMUSG00000030168.14	Adipor2	adiponectin receptor 2	1.91565	1.28989e-49
ENSMUSG00000024799.17	Tm7sf2	transmembrane 7 superfamily member 2	3.0285	2.3945e-49
ENSMUSG00000065954.12	Tacc1	transforming, acidic coiled-coil containing protein 1	1.78152	3.12365e-49
ENSMUSG00000021196.15	Pfkp	phosphofructokinase, platelet	2.17927	5.08192e-49
ENSMUSG00000035112.18	Wnk4	WNK lysine deficient protein kinase 4	2.44742	7.94613e-49
ENSMUSG00000025366.9	Esyt1	extended synaptotagmin-like protein 1	1.83864	1.16254e-48
ENSMUSG00000029499.12	Pxmp2	peroxisomal membrane protein 2	4.47594	2.02703e-48
ENSMUSG00000075706.12	Gpx4	glutathione peroxidase 4	1.71939	2.05406e-48
ENSMUSG00000001666.9	Ddt	D-dopachrome tautomerase	2.54436	2.95054e-48
ENSMUSG00000025510.15	Cd151	CD151 antigen	1.90891	5.03731e-48
ENSMUSG00000015305.7	Sash1	SAM and SH3 domain containing 1	1.7472	5.0797e-48
ENSMUSG00000031490.7	Eif4ebp1	eukaryotic translation initiation factor 4E binding protein 1	2.01062	6.87706e-48
ENSMUSG00000048371.9	Pdp2	pyruvate dehydrogenase phosphatase catalytic subunit 2	2.25548	1.01152e-47
ENSMUSG00000031231.5	Cox7b	cytochrome c oxidase subunit 7B	1.96632	1.06404e-47
ENSMUSG00000037656.10	Slc20a2	solute carrier family 20, member 2	2.11686	1.11929e-47
ENSMUSG00000020917.18	Acly	ATP citrate lyase	1.68305	1.24553e-47
ENSMUSG00000021701.9	Plk2	polo like kinase 2	-2.18298	2.14857e-47
ENSMUSG00000003464.14	Pex19	peroxisomal biogenesis factor 19	1.86592	2.30848e-47
ENSMUSG00000070576.5	Mn1	meningioma 1	-2.16296	2.73139e-47
ENSMUSG00000036751.8	Cox6b1	cytochrome c oxidase, subunit 6B1	2.28238	4.79257e-47
ENSMUSG00000025934.16	Gsta3	glutathione S-transferase, alpha 3	5.51589	6.62464e-47
ENSMUSG00000037852.9	Cpe	carboxypeptidase E	-1.63377	1.06351e-46
ENSMUSG00000006517.6	Mvd	mevalonate (diphospho) decarboxylase	2.69295	1.27667e-46
ENSMUSG00000023905.16	Tnfrsf12a	tumor necrosis factor receptor superfamily, member 12a	2.64841	1.5087e-46
ENSMUSG00000029309.8	Sparcl1	SPARC-like 1	2.02419	1.58489e-46
ENSMUSG00000030074.10	Gxylt2	glucoside xylosyltransferase 2	-1.93248	1.74421e-46
ENSMUSG00000030120.15	Mlf2	myeloid leukemia factor 2	1.73294	1.78042e-46
ENSMUSG00000031099.17	Smarca1	SWI/SNF related, matrix associated, actin dependent regulator of chromatin, subfamily a, member 1	-2.21073	2.15173e-46
ENSMUSG00000025940.7	Tmem70	transmembrane protein 70	2.35332	2.21481e-46
ENSMUSG00000023456.17	Tpi1	triosephosphate isomerase 1	1.57194	2.67875e-46
ENSMUSG00000032271.14	Nnmt	nicotinamide N-methyltransferase	2.20096	3.4578e-46
ENSMUSG00000053199.14	Arhgap20	Rho GTPase activating protein 20	-1.91943	4.52473e-46
ENSMUSG00000024785.8	Rcl1	RNA terminal phosphate cyclase-like 1	2.30801	5.1207e-46
ENSMUSG00000040717.7	Il17rd	interleukin 17 receptor D	-2.12545	5.98407e-46
ENSMUSG00000026003.6	Acadl	acyl-Coenzyme A dehydrogenase, long-chain	1.98525	6.25646e-46
ENSMUSG00000021388.15	Aspn	asporin	-1.62829	7.33573e-46
ENSMUSG00000021794.17	Glud1	glutamate dehydrogenase 1	1.74587	1.1557e-45
ENSMUSG00000014329.15	Bicc1	BicC family RNA binding protein 1	-1.6868	1.25739e-45
ENSMUSG00000038375.16	Trp53inp2	transformation related protein 53 inducible nuclear protein 2	1.86604	1.77902e-45
ENSMUSG00000062580.10	Timm17a	translocase of inner mitochondrial membrane 17a	1.99396	1.97953e-45
ENSMUSG00000015357.11	Clpx	caseinolytic mitochondrial matrix peptidase chaperone subunit	1.92608	2.626e-45
ENSMUSG00000025950.17	Idh1	isocitrate dehydrogenase 1 (NADP+), soluble	1.63713	2.78668e-45
ENSMUSG00000025271.14	Pfkfb1	6-phosphofructo-2-kinase/fructose-2,6-biphosphatase 1	3.16562	3.22607e-45
ENSMUSG00000070493.4	Chchd2	coiled-coil-helix-coiled-coil-helix domain containing 2	1.7657	5.12332e-45
ENSMUSG00000022437.8	Samm50	SAMM50 sorting and assembly machinery component	2.09302	7.25705e-45
ENSMUSG00000024663.21	Rab3il1	RAB3A interacting protein (rabin3)-like 1	-1.91929	1.48013e-44
ENSMUSG00000032047.6	Acat1	acetyl-Coenzyme A acetyltransferase 1	1.65533	1.49674e-44
ENSMUSG00000034684.13	Sema3f	sema domain, immunoglobulin domain (Ig), short basic domain, secreted, (semaphorin) 3F	-2.11191	1.99651e-44
ENSMUSG00000005299.7	Letm1	leucine zipper-EF-hand containing transmembrane protein 1	2.19528	2.06294e-44
ENSMUSG00000058446.15	Znrf2	zinc and ring finger 2	2.02411	2.51437e-44
ENSMUSG00000029570.6	Lfng	LFNG O-fucosylpeptide 3-beta-N-acetylglucosaminyltransferase	3.65424	2.66483e-44
ENSMUSG00000047045.18	Tmem164	transmembrane protein 164	-1.64281	3.3905e-44
ENSMUSG00000031558.16	Slit2	slit guidance ligand 2	-2.19646	4.83154e-44
ENSMUSG00000038150.8	Ormdl3	ORM1-like 3 (S. cerevisiae)	1.76952	5.17397e-44
ENSMUSG00000031502.12	Col4a1	collagen, type IV, alpha 1	1.42579	5.59174e-44
ENSMUSG00000030869.12	Ndufab1	NADH:ubiquinone oxidoreductase subunit AB1	2.26782	6.87423e-44
ENSMUSG00000029199.12	Lias	lipoic acid synthetase	2.03239	1.4899e-43
ENSMUSG00000024892.18	Pcx	pyruvate carboxylase	5.45423	1.94611e-43
ENSMUSG00000024527.11	Afg3l2	AFG3-like AAA ATPase 2	1.69497	2.73352e-43
ENSMUSG00000017466.10	Timp2	tissue inhibitor of metalloproteinase 2	-1.64384	2.81554e-43
ENSMUSG00000033083.17	Tbc1d4	TBC1 domain family, member 4	1.99911	3.163e-43
ENSMUSG00000089715.13	Cbx6	chromobox 6	-1.51943	3.79393e-43
ENSMUSG00000040548.17	Tex2	testis expressed gene 2	1.97305	4.56458e-43
ENSMUSG00000024747.4	Aldh1a7	aldehyde dehydrogenase family 1, subfamily A7	8.98088	5.13314e-43
ENSMUSG00000027848.13	Olfml3	olfactomedin-like 3	-2.21958	6.39717e-43
ENSMUSG00000025348.10	Itga7	integrin alpha 7	3.34652	7.26579e-43
ENSMUSG00000021102.5	Glrx5	glutaredoxin 5	2.34823	7.30808e-43
ENSMUSG00000041559.8	Fmod	fibromodulin	-3.7804	8.76554e-43
ENSMUSG00000030647.9	Ndufc2	NADH:ubiquinone oxidoreductase subunit C2	2.0492	1.17053e-42
ENSMUSG00000027984.9	Hadh	hydroxyacyl-Coenzyme A dehydrogenase	1.70111	1.18093e-42
ENSMUSG00000024507.7	Hsd17b4	hydroxysteroid (17-beta) dehydrogenase 4	1.74397	1.54468e-42
ENSMUSG00000023800.16	Tiam2	T cell lymphoma invasion and metastasis 2	-1.82293	1.58938e-42
ENSMUSG00000030498.16	Gas2	growth arrest specific 2	-2.21348	1.6185e-42
ENSMUSG00000071856.11	Mcc	mutated in colorectal cancers	-1.82309	2.17079e-42
ENSMUSG00000005882.19	Uqcc1	ubiquinol-cytochrome c reductase complex assembly factor 1	2.0403	2.47514e-42
ENSMUSG00000012705.17	Retn	resistin	13.9863	2.93253e-42
ENSMUSG00000039607.18	Rbms3	RNA binding motif, single stranded interacting protein	-1.56569	3.75385e-42
ENSMUSG00000026825.18	Dnm1	dynamin 1	-1.59876	3.86083e-42
ENSMUSG00000022378.15	Cyrib	CYFIP related Rac1 interactor B	2.35893	5.00596e-42
ENSMUSG00000020300.15	Cpeb4	cytoplasmic polyadenylation element binding protein 4	1.72722	5.92986e-42
ENSMUSG00000031538.7	Plat	plasminogen activator, tissue	-2.31189	7.40204e-42
ENSMUSG00000053768.14	Chchd3	coiled-coil-helix-coiled-coil-helix domain containing 3	1.72824	9.17312e-42
ENSMUSG00000002265.18	Peg3	paternally expressed 3	-1.512	1.15854e-41
ENSMUSG00000025743.15	Sdc3	syndecan 3	-1.90455	1.20528e-41
ENSMUSG00000039048.16	Foxred1	FAD-dependent oxidoreductase domain containing 1	2.29832	1.45197e-41
ENSMUSG00000056870.10	Gulp1	GULP, engulfment adaptor PTB domain containing 1	-1.73017	1.76776e-41
ENSMUSG00000023031.9	Cela1	chymotrypsin-like elastase family, member 1	2.89138	1.86149e-41
ENSMUSG00000033105.13	Lss	lanosterol synthase	2.51737	1.96261e-41
ENSMUSG00000057497.9	Fam136a	family with sequence similarity 136, member A	1.99851	2.1369e-41
ENSMUSG00000028124.16	Gclm	glutamate-cysteine ligase, modifier subunit	1.95279	2.54397e-41
ENSMUSG00000026860.17	Sh3glb2	SH3-domain GRB2-like endophilin B2	1.86235	2.56055e-41
ENSMUSG00000024978.12	Gpam	glycerol-3-phosphate acyltransferase, mitochondrial	1.73403	2.97504e-41
ENSMUSG00000021646.10	Mccc2	methylcrotonoyl-Coenzyme A carboxylase 2 (beta)	2.10252	3.30805e-41
ENSMUSG00000072946.13	Ptgr2	prostaglandin reductase 2	2.04498	3.54857e-41
ENSMUSG00000041736.8	Tspo	translocator protein	1.57425	4.14932e-41
ENSMUSG00000028150.15	Rorc	RAR-related orphan receptor gamma	4.89439	6.85176e-41
ENSMUSG00000023156.5	Rpp14	ribonuclease P 14 subunit	2.15933	7.59201e-41
ENSMUSG00000028369.16	Svep1	sushi, von Willebrand factor type A, EGF and pentraxin domain containing 1	-1.41769	1.12998e-40
ENSMUSG00000029017.14	Pmpcb	peptidase (mitochondrial processing) beta	2.05352	1.16203e-40
ENSMUSG00000046169.11	Adamts6	a disintegrin-like and metallopeptidase (reprolysin type) with thrombospondin type 1 motif, 6	-2.07743	2.67244e-40
ENSMUSG00000009112.5	Bcl2l13	BCL2-like 13 (apoptosis facilitator)	1.85937	2.74878e-40
ENSMUSG00000029020.14	Mfn2	mitofusin 2	1.82687	2.91752e-40
ENSMUSG00000039542.17	Ncam1	neural cell adhesion molecule 1	-1.59304	3.46659e-40
ENSMUSG00000042632.18	Pla2g6	phospholipase A2, group VI	2.13216	5.48302e-40
ENSMUSG00000040213.14	Kyat3	kynurenine aminotransferase 3	2.82794	6.45089e-40
ENSMUSG00000024158.18	Hagh	hydroxyacyl glutathione hydrolase	2.22787	7.28415e-40
ENSMUSG00000014313.16	Cox6c	cytochrome c oxidase subunit 6C	1.8295	7.31542e-40
ENSMUSG00000006057.16	Atp5g1	ATP synthase, H+ transporting, mitochondrial F0 complex, subunit C1 (subunit 9)	1.89888	8.22876e-40
ENSMUSG00000000088.8	Cox5a	cytochrome c oxidase subunit 5A	2.015	1.11325e-39
ENSMUSG00000004264.18	Phb2	prohibitin 2	1.55438	1.40959e-39
ENSMUSG00000022464.15	Slc38a4	solute carrier family 38, member 4	-2.16708	1.45699e-39
ENSMUSG00000027210.21	Meis2	Meis homeobox 2	-1.71704	1.58812e-39
ENSMUSG00000031595.10	Pdgfrl	platelet-derived growth factor receptor-like	-2.07417	2.04396e-39
ENSMUSG00000027999.16	Pla2g12a	phospholipase A2, group XIIA	2.22728	2.4658e-39
ENSMUSG00000030203.18	Dusp16	dual specificity phosphatase 16	2.05177	3.0757e-39
ENSMUSG00000022982.11	Sod1	superoxide dismutase 1, soluble	1.87849	3.60584e-39
ENSMUSG00000028393.11	Alad	aminolevulinate, delta-, dehydratase	2.25189	4.12948e-39
ENSMUSG00000039956.10	Mrap	melanocortin 2 receptor accessory protein	11.0662	4.66283e-39
ENSMUSG00000026618.12	Iars2	isoleucine-tRNA synthetase 2, mitochondrial	1.58079	5.31948e-39
ENSMUSG00000005354.17	Txn2	thioredoxin 2	1.66223	6.04024e-39
ENSMUSG00000036752.5	Tubb4b	tubulin, beta 4B class IVB	1.58574	7.81283e-39
ENSMUSG00000024190.8	Dusp1	dual specificity phosphatase 1	2.40879	1.53874e-38
ENSMUSG00000029575.18	Mmab	methylmalonic aciduria (cobalamin deficiency) cblB type homolog (human)	1.98402	1.59859e-38
ENSMUSG00000035299.17	Mid1	midline 1	-1.89809	2.04801e-38
ENSMUSG00000024842.9	Cabp4	calcium binding protein 4	6.7406	2.07041e-38
ENSMUSG00000032314.15	Etfa	electron transferring flavoprotein, alpha polypeptide	1.70934	2.96873e-38
ENSMUSG00000035476.10	Tab3	TGF-beta activated kinase 1/MAP3K7 binding protein 3	2.35907	4.66027e-38
ENSMUSG00000030335.7	Mrpl51	mitochondrial ribosomal protein L51	1.91788	5.30806e-38
ENSMUSG00000020484.20	Xbp1	X-box binding protein 1	1.56566	5.85745e-38
ENSMUSG00000058056.17	Palld	palladin, cytoskeletal associated protein	-1.77684	6.37362e-38
ENSMUSG00000046546.4	Fam43a	family with sequence similarity 43, member A	-1.55552	7.17422e-38
ENSMUSG00000029405.17	G3bp2	GTPase activating protein (SH3 domain) binding protein 2	1.45773	7.99085e-38
ENSMUSG00000026249.11	Serpine2	serine (or cysteine) peptidase inhibitor, clade E, member 2	-1.65701	8.52836e-38
ENSMUSG00000026574.6	Dpt	dermatopontin	-1.95971	8.54426e-38
ENSMUSG00000028247.3	Coq3	coenzyme Q3 methyltransferase	2.40255	9.54561e-38
ENSMUSG00000006369.15	Fbln1	fibulin 1	-2.35626	1.03191e-37
ENSMUSG00000039405.8	Prss23	protease, serine 23	-1.62893	1.11529e-37
ENSMUSG00000021371.6	Mcur1	mitochondrial calcium uniporter regulator 1	1.93256	1.21512e-37
ENSMUSG00000022150.17	Dab2	disabled 2, mitogen-responsive phosphoprotein	-1.7179	1.27076e-37
ENSMUSG00000026623.17	Lpgat1	lysophosphatidylglycerol acyltransferase 1	1.50391	1.402e-37
ENSMUSG00000028691.13	Prdx1	peroxiredoxin 1	1.40669	1.83207e-37
ENSMUSG00000009376.16	Met	met proto-oncogene	1.61862	1.97263e-37
ENSMUSG00000004558.16	Ndrg2	N-myc downstream regulated gene 2	4.90838	2.50581e-37
ENSMUSG00000027208.15	Fgf7	fibroblast growth factor 7	-2.0089	2.78842e-37
ENSMUSG00000073489.7	Ifi204	interferon activated gene 204	2.20769	4.16515e-37
ENSMUSG00000053398.12	Phgdh	3-phosphoglycerate dehydrogenase	1.57046	4.48504e-37
ENSMUSG00000063229.16	Ldha	lactate dehydrogenase A	1.38937	4.71838e-37
ENSMUSG00000017144.9	Rnd3	Rho family GTPase 3	-1.65341	5.11518e-37
ENSMUSG00000040690.16	Col16a1	collagen, type XVI, alpha 1	-1.62312	5.17974e-37
ENSMUSG00000046841.6	Ckap4	cytoskeleton-associated protein 4	-1.54937	5.22796e-37
ENSMUSG00000025781.15	Atp5c1	ATP synthase, H+ transporting, mitochondrial F1 complex, gamma polypeptide 1	1.60483	5.44606e-37
ENSMUSG00000028671.17	Gale	galactose-4-epimerase, UDP	2.60479	6.04738e-37
ENSMUSG00000030162.15	Olr1	oxidized low density lipoprotein (lectin-like) receptor 1	5.44272	6.26347e-37
ENSMUSG00000035284.11	Vps13c	vacuolar protein sorting 13C	1.73949	6.45526e-37
ENSMUSG00000020547.6	Bzw2	basic leucine zipper and W2 domains 2	1.78345	8.06618e-37
ENSMUSG00000027346.16	Gpcpd1	glycerophosphocholine phosphodiesterase 1	1.62145	8.81704e-37
ENSMUSG00000020744.14	Slc25a19	solute carrier family 25 (mitochondrial thiamine pyrophosphate carrier), member 19	2.39276	9.03958e-37
ENSMUSG00000031299.11	Pdha1	pyruvate dehydrogenase E1 alpha 1	1.44886	9.99828e-37
ENSMUSG00000021235.14	Coq6	coenzyme Q6 monooxygenase	2.16633	1.21163e-36
ENSMUSG00000018830.11	Myh11	myosin, heavy polypeptide 11, smooth muscle	3.78544	1.51461e-36
ENSMUSG00000047344.10	Lancl3	LanC lantibiotic synthetase component C-like 3 (bacterial)	-4.14922	2.00323e-36
ENSMUSG00000058022.15	Adtrp	androgen dependent TFPI regulating protein	7.48706	2.55576e-36
ENSMUSG00000011752.8	Pgam1	phosphoglycerate mutase 1	1.34932	2.87658e-36
ENSMUSG00000079037.10	Prnp	prion protein	1.46162	3.05619e-36
ENSMUSG00000026032.9	Ndufb3	NADH:ubiquinone oxidoreductase subunit B3	2.18463	3.44045e-36
ENSMUSG00000042599.9	Kdm7a	lysine (K)-specific demethylase 7A	1.4222	3.56167e-36
ENSMUSG00000027996.14	Sfrp2	secreted frizzled-related protein 2	-2.42583	4.40032e-36
ENSMUSG00000066361.4	Serpina3c	serine (or cysteine) peptidase inhibitor, clade A, member 3C	3.0164	5.36551e-36
ENSMUSG00000028583.15	Pdpn	podoplanin	-2.22002	5.36733e-36
ENSMUSG00000016427.8	Ndufa1	NADH:ubiquinone oxidoreductase subunit A1	2.24864	8.4018e-36
ENSMUSG00000058571.12	Gpc6	glypican 6	-1.98037	8.44054e-36
ENSMUSG00000006586.16	Runx1t1	RUNX1 translocation partner 1	-1.77404	8.90436e-36
ENSMUSG00000019066.14	Rab3d	RAB3D, member RAS oncogene family	2.30932	8.99359e-36
ENSMUSG00000075419.5	Dolk	dolichol kinase	1.91468	9.44621e-36
ENSMUSG00000024378.10	Stard4	StAR-related lipid transfer (START) domain containing 4	2.24514	9.6752e-36
ENSMUSG00000027327.17	1700037H04Rik	RIKEN cDNA 1700037H04 gene	2.03811	1.18166e-35
ENSMUSG00000000278.11	Scpep1	serine carboxypeptidase 1	-1.50809	1.22346e-35
ENSMUSG00000036606.18	Plxnb2	plexin B2	-1.36622	1.65085e-35
ENSMUSG00000071528.5	Atp5md	ATP synthase membrane subunit DAPIT	1.70978	1.78297e-35
ENSMUSG00000027832.6	Ptx3	pentraxin related gene	-1.50982	1.84919e-35
ENSMUSG00000000838.18	Fmr1	fragile X messenger ribonucleoprotein 1	1.54822	1.894e-35
ENSMUSG00000038668.15	Lpar1	lysophosphatidic acid receptor 1	-1.70866	2.34375e-35
ENSMUSG00000043613.9	Mmp3	matrix metallopeptidase 3	-2.75023	2.70056e-35
ENSMUSG00000020988.10	L2hgdh	L-2-hydroxyglutarate dehydrogenase	2.26794	2.77652e-35
ENSMUSG00000024955.16	Esrra	estrogen related receptor, alpha	1.69586	2.84937e-35
ENSMUSG00000042644.10	Itpr3	inositol 1,4,5-triphosphate receptor 3	-1.7261	3.01836e-35
ENSMUSG00000021024.15	Psma6	proteasome subunit alpha 6	1.54662	3.7765e-35
ENSMUSG00000048612.17	Myof	myoferlin	-1.38811	3.82423e-35
ENSMUSG00000024132.7	Eci1	enoyl-Coenzyme A delta isomerase 1	1.77846	3.89361e-35
ENSMUSG00000029190.20	D5Ertd579e	DNA segment, Chr 5, ERATO Doi 579, expressed	1.39849	4.7894e-35
ENSMUSG00000098188.2	Sowahc	sosondowah ankyrin repeat domain family member C	1.62963	6.44306e-35
ENSMUSG00000053329.8	Gatd3a	glutamine amidotransferase like class 1 domain containing 3A	1.81827	8.69854e-35
ENSMUSG00000022090.11	Pdlim2	PDZ and LIM domain 2	-1.89097	1.15267e-34
ENSMUSG00000079470.9	Utp14b	UTP14B small subunit processome component	2.15953	1.36545e-34
ENSMUSG00000032330.8	Cox7a2	cytochrome c oxidase subunit 7A2	1.90862	1.4716e-34
ENSMUSG00000026278.15	Bok	BCL2-related ovarian killer	2.96583	1.86636e-34
ENSMUSG00000042745.10	Id1	inhibitor of DNA binding 1, HLH protein	2.54734	2.10945e-34
ENSMUSG00000029036.19	Atad3a	ATPase family, AAA domain containing 3A	2.1089	2.19509e-34
ENSMUSG00000029632.8	Ndufa4	Ndufa4, mitochondrial complex associated	1.89184	2.38738e-34
ENSMUSG00000053931.12	Cnn3	calponin 3, acidic	-1.45779	2.94511e-34
ENSMUSG00000029455.15	Aldh2	aldehyde dehydrogenase 2, mitochondrial	1.76533	3.71181e-34
ENSMUSG00000042515.14	Pwwp3b	PWWP domain containing 3B	-2.34173	3.8058e-34
ENSMUSG00000032010.16	Usp2	ubiquitin specific peptidase 2	3.02317	3.84936e-34
ENSMUSG00000063882.13	Uqcrh	ubiquinol-cytochrome c reductase hinge protein	1.693	3.90673e-34
ENSMUSG00000041957.16	Pkp2	plakophilin 2	3.08897	4.293e-34
ENSMUSG00000028047.12	Thbs3	thrombospondin 3	-2.45603	4.83944e-34
ENSMUSG00000001020.9	S100a4	S100 calcium binding protein A4	-1.49764	4.91479e-34
ENSMUSG00000019539.12	Rcn3	reticulocalbin 3, EF-hand calcium binding domain	-1.53304	6.55868e-34
ENSMUSG00000054555.12	Adam12	a disintegrin and metallopeptidase domain 12 (meltrin alpha)	1.40388	7.36351e-34
ENSMUSG00000040957.16	Cables1	CDK5 and Abl enzyme substrate 1	4.60691	1.18703e-33
ENSMUSG00000005413.9	Hmox1	heme oxygenase 1	1.36222	1.32489e-33
ENSMUSG00000051314.12	Ffar2	free fatty acid receptor 2	9.02458	1.38438e-33
ENSMUSG00000024420.10	Zfp521	zinc finger protein 521	-1.51211	1.50541e-33
ENSMUSG00000005973.7	Rcn1	reticulocalbin 1	-1.37081	1.68994e-33
ENSMUSG00000063455.17	D630045J12Rik	RIKEN cDNA D630045J12 gene	-1.78385	2.07286e-33
ENSMUSG00000025137.16	Pcyt2	phosphate cytidylyltransferase 2, ethanolamine	2.00585	2.30809e-33
ENSMUSG00000028789.17	Azin2	antizyme inhibitor 2	1.88831	2.54011e-33
ENSMUSG00000025630.9	Hprt	hypoxanthine guanine phosphoribosyl transferase	1.8056	2.56053e-33
ENSMUSG00000058013.12	Septin11	septin 11	-1.37852	2.61206e-33
ENSMUSG00000020153.15	Ndufs7	NADH:ubiquinone oxidoreductase core subunit S7	1.97818	2.66781e-33
ENSMUSG00000048537.17	Phldb1	pleckstrin homology like domain, family B, member 1	1.44679	2.80561e-33
ENSMUSG00000027244.15	Atg13	autophagy related 13	1.58475	3.45551e-33
ENSMUSG00000000957.12	Mmp14	matrix metallopeptidase 14 (membrane-inserted)	-1.41538	3.59468e-33
ENSMUSG00000032527.14	Pccb	propionyl Coenzyme A carboxylase, beta polypeptide	1.67676	4.21894e-33
ENSMUSG00000051323.17	Pcdh19	protocadherin 19	-1.59516	4.25762e-33
ENSMUSG00000034675.18	Dbn1	drebrin 1	-1.79846	5.27003e-33
ENSMUSG00000022956.12	Atp5o	ATP synthase, H+ transporting, mitochondrial F1 complex, O subunit	1.67171	5.44086e-33
ENSMUSG00000001100.11	Poldip2	polymerase (DNA-directed), delta interacting protein 2	1.46988	5.65783e-33
ENSMUSG00000035357.18	Pdzrn3	PDZ domain containing RING finger 3	-1.56697	5.95308e-33
ENSMUSG00000036356.16	Csgalnact1	chondroitin sulfate N-acetylgalactosaminyltransferase 1	-1.67119	6.8807e-33
ENSMUSG00000067276.6	Capn6	calpain 6	-1.45618	7.22778e-33
ENSMUSG00000036545.10	Adamts2	a disintegrin-like and metallopeptidase (reprolysin type) with thrombospondin type 1 motif, 2	-1.34984	7.7443e-33
ENSMUSG00000040048.15	Ndufb10	NADH:ubiquinone oxidoreductase subunit B10	1.66483	8.04637e-33
ENSMUSG00000008153.13	Clstn3	calsyntenin 3	5.7147	8.42504e-33
ENSMUSG00000059921.16	Unc5c	unc-5 netrin receptor C	-1.95371	9.12752e-33
ENSMUSG00000039196.3	Orm1	orosomucoid 1	12.2876	9.37386e-33
ENSMUSG00000047260.5	Emc6	ER membrane protein complex subunit 6	2.18071	9.41904e-33
ENSMUSG00000008734.10	Gprc5b	G protein-coupled receptor, family C, group 5, member B	1.44881	9.55077e-33
ENSMUSG00000031740.9	Mmp2	matrix metallopeptidase 2	-1.2884	1.22227e-32
ENSMUSG00000022263.11	Trio	triple functional domain (PTPRF interacting)	-1.51326	1.31799e-32
ENSMUSG00000009687.15	Fxyd5	FXYD domain-containing ion transport regulator 5	-2.9682	1.3704e-32
ENSMUSG00000074064.7	Mlycd	malonyl-CoA decarboxylase	2.17871	1.42746e-32
ENSMUSG00000005312.16	Ubqln1	ubiquilin 1	1.50076	1.42931e-32
ENSMUSG00000005469.11	Prkaca	protein kinase, cAMP dependent, catalytic, alpha	1.48133	1.66041e-32
ENSMUSG00000096255.3	Dynlt1b	dynein light chain Tctex-type 1B	1.747	1.87763e-32
ENSMUSG00000061589.15	Dot1l	DOT1-like, histone H3 methyltransferase (S. cerevisiae)	1.64994	2.29834e-32
ENSMUSG00000021665.10	Hexb	hexosaminidase B	-1.75735	2.34098e-32
ENSMUSG00000045763.9	Basp1	brain abundant, membrane attached signal protein 1	-1.63136	2.40603e-32
ENSMUSG00000004665.11	Cnn2	calponin 2	-1.47801	2.69064e-32
ENSMUSG00000020963.16	Tshr	thyroid stimulating hormone receptor	5.72232	2.76447e-32
ENSMUSG00000024601.10	Isoc1	isochorismatase domain containing 1	1.67096	2.80566e-32
ENSMUSG00000013701.14	Timm23	translocase of inner mitochondrial membrane 23	1.56707	3.04104e-32
ENSMUSG00000035914.12	Cd276	CD276 antigen	-1.81342	4.25826e-32
ENSMUSG00000024835.16	Coro1b	coronin, actin binding protein 1B	1.53224	4.28193e-32
ENSMUSG00000020009.14	Ifngr1	interferon gamma receptor 1	1.90058	4.5714e-32
ENSMUSG00000030020.14	Prickle2	prickle planar cell polarity protein 2	-1.92534	4.6831e-32
ENSMUSG00000022018.8	Rgcc	regulator of cell cycle	4.00625	5.97359e-32
ENSMUSG00000034158.10	Lrrc58	leucine rich repeat containing 58	1.24348	6.56086e-32
ENSMUSG00000014813.10	Stc1	stanniocalcin 1	-2.77824	7.17533e-32
ENSMUSG00000018677.10	Slc25a39	solute carrier family 25, member 39	1.39277	7.74864e-32
ENSMUSG00000033068.17	Entpd6	ectonucleoside triphosphate diphosphohydrolase 6	1.87651	8.89695e-32
ENSMUSG00000025260.11	Hsd17b10	hydroxysteroid (17-beta) dehydrogenase 10	1.68714	1.00022e-31
ENSMUSG00000016995.18	Matn4	matrilin 4	-2.02443	1.05279e-31
ENSMUSG00000042709.16	Atpaf2	ATP synthase mitochondrial F1 complex assembly factor 2	2.20152	1.44684e-31
ENSMUSG00000028601.19	Echdc2	enoyl Coenzyme A hydratase domain containing 2	1.81106	1.51056e-31
ENSMUSG00000050288.7	Fzd2	frizzled class receptor 2	-1.66821	1.52168e-31
ENSMUSG00000047003.16	Zfp41	zinc finger protein 41	-1.78579	1.62753e-31
ENSMUSG00000002015.6	Bcap31	B cell receptor associated protein 31	1.58224	1.73883e-31
ENSMUSG00000029195.11	Klb	klotho beta	6.57663	1.75716e-31
ENSMUSG00000021806.5	Nid2	nidogen 2	-1.35327	1.87862e-31
ENSMUSG00000035783.10	Acta2	actin alpha 2, smooth muscle, aorta	-2.05921	2.40875e-31
ENSMUSG00000034247.10	Plekhm1	pleckstrin homology domain containing, family M (with RUN domain) member 1	1.6679	2.56453e-31
ENSMUSG00000060487.8	Samd5	sterile alpha motif domain containing 5	-2.54786	2.65169e-31
ENSMUSG00000023010.16	Tmbim6	transmembrane BAX inhibitor motif containing 6	1.32152	3.21209e-31
ENSMUSG00000001829.18	Clpb	ClpB caseinolytic peptidase B	1.71452	3.26256e-31
ENSMUSG00000020044.14	Timp3	tissue inhibitor of metalloproteinase 3	-2.68309	3.41311e-31
ENSMUSG00000020029.7	Nudt4	nudix (nucleoside diphosphate linked moiety X)-type motif 4	1.32736	3.65604e-31
ENSMUSG00000022707.17	Gbe1	glucan (1,4-alpha-), branching enzyme 1	2.13999	3.747e-31
ENSMUSG00000019124.11	Scrn1	secernin 1	-1.86711	4.16922e-31
ENSMUSG00000089665.3	Fcor	Foxo1 corepressor	5.15507	4.18533e-31
ENSMUSG00000028179.13	Cth	cystathionase (cystathionine gamma-lyase)	2.15497	4.27691e-31
ENSMUSG00000039987.16	Phtf2	putative homeodomain transcription factor 2	2.21017	4.42315e-31
ENSMUSG00000027200.18	Sema6d	sema domain, transmembrane domain (TM), and cytoplasmic domain, (semaphorin) 6D	1.54254	6.43579e-31
ENSMUSG00000039515.12	Ptpa	protein phosphatase 2 protein activator	1.35485	7.63383e-31
ENSMUSG00000067780.4	Pi15	peptidase inhibitor 15	-1.53222	9.31121e-31
ENSMUSG00000028883.20	Sema3a	sema domain, immunoglobulin domain (Ig), short basic domain, secreted, (semaphorin) 3A	-1.57761	9.79819e-31
ENSMUSG00000005958.16	Ephb3	Eph receptor B3	-1.62399	1.0168e-30
ENSMUSG00000043903.5	Zfp469	zinc finger protein 469	-3.07091	1.04547e-30
ENSMUSG00000024359.11	Hspa9	heat shock protein 9	1.24821	1.05075e-30
ENSMUSG00000020160.19	Meis1	Meis homeobox 1	-1.51762	1.15409e-30
ENSMUSG00000026229.18	Psmd1	proteasome (prosome, macropain) 26S subunit, non-ATPase, 1	1.33726	1.17111e-30
ENSMUSG00000033788.16	Dysf	dysferlin	2.54727	1.21241e-30
ENSMUSG00000038412.9	Higd1a	HIG1 domain family, member 1A	1.90879	1.22739e-30
ENSMUSG00000116138.2	C030006K11Rik	RIKEN cDNA C030006K11 gene	1.90829	1.24627e-30
ENSMUSG00000038259.5	Gdf5	growth differentiation factor 5	7.41767	1.39436e-30
ENSMUSG00000004043.15	Stat5a	signal transducer and activator of transcription 5A	1.4838	1.47449e-30
ENSMUSG00000027966.21	Col11a1	collagen, type XI, alpha 1	-1.58253	1.52864e-30
ENSMUSG00000048787.14	Dcun1d3	DCN1, defective in cullin neddylation 1, domain containing 3 (S. cerevisiae)	1.65563	1.74995e-30
ENSMUSG00000036533.10	Cdc42ep3	CDC42 effector protein (Rho GTPase binding) 3	-1.75547	2.18901e-30
ENSMUSG00000032011.6	Thy1	thymus cell antigen 1, theta	-1.65534	2.21863e-30
ENSMUSG00000037523.14	Mavs	mitochondrial antiviral signaling protein	1.65665	2.63935e-30
ENSMUSG00000022048.9	Dpysl2	dihydropyrimidinase-like 2	-1.60308	2.83814e-30
ENSMUSG00000024866.11	Acy3	aspartoacylase (aminoacylase) 3	3.749	3.06941e-30
ENSMUSG00000027230.10	Creb3l1	cAMP responsive element binding protein 3-like 1	-2.01593	3.3818e-30
ENSMUSG00000046318.17	Ccbe1	collagen and calcium binding EGF domains 1	-1.92629	3.53199e-30
ENSMUSG00000017677.12	Wsb1	WD repeat and SOCS box-containing 1	-1.37713	3.77026e-30
ENSMUSG00000028793.16	Rnf19b	ring finger protein 19B	1.91461	4.00605e-30
ENSMUSG00000021360.17	Gcnt2	glucosaminyl (N-acetyl) transferase 2, I-branching enzyme	2.68674	5.51132e-30
ENSMUSG00000031337.17	Mtm1	X-linked myotubular myopathy gene 1	1.94412	6.3575e-30
ENSMUSG00000074480.5	Mex3a	mex3 RNA binding family member A	-1.75746	6.64574e-30
ENSMUSG00000040370.14	Etfrf1	electron transfer flavoprotein regulatory factor 1	1.81146	7.28793e-30
ENSMUSG00000047945.7	Marcksl1	MARCKS-like 1	-1.87639	8.27119e-30
ENSMUSG00000019590.17	Cyb561	cytochrome b-561	5.90737	8.38863e-30
ENSMUSG00000030717.10	Nupr1	nuclear protein transcription regulator 1	1.83992	8.45306e-30
ENSMUSG00000018761.15	Mpdu1	mannose-P-dolichol utilization defect 1	1.93419	9.8411e-30
ENSMUSG00000038717.10	Atp5l	ATP synthase, H+ transporting, mitochondrial F0 complex, subunit G	1.52813	1.01884e-29
ENSMUSG00000028973.19	Abcb8	ATP-binding cassette, sub-family B (MDR/TAP), member 8	1.72027	1.04542e-29
ENSMUSG00000038121.7	Fam210a	family with sequence similarity 210, member A	1.38492	1.05596e-29
ENSMUSG00000017774.20	Myo1c	myosin IC	1.23441	1.07157e-29
ENSMUSG00000058997.9	Vwa8	von Willebrand factor A domain containing 8	1.38666	1.11762e-29
ENSMUSG00000029581.15	Fscn1	fascin actin-bundling protein 1	-1.30719	1.17558e-29
ENSMUSG00000061904.13	Slc25a3	solute carrier family 25 (mitochondrial carrier, phosphate carrier), member 3	1.24351	1.28968e-29
ENSMUSG00000027099.10	Mtx2	metaxin 2	1.46949	1.48264e-29
ENSMUSG00000029066.13	Mrpl20	mitochondrial ribosomal protein L20	1.88295	1.82012e-29
ENSMUSG00000005951.14	Shpk	sedoheptulokinase	2.41975	1.9747e-29
ENSMUSG00000032009.9	Sesn3	sestrin 3	-1.31076	1.98683e-29
ENSMUSG00000067847.14	Romo1	reactive oxygen species modulator 1	1.7301	2.04125e-29
ENSMUSG00000025932.15	Eya1	EYA transcriptional coactivator and phosphatase 1	-1.87264	2.39289e-29
ENSMUSG00000036553.17	Sh3tc1	SH3 domain and tetratricopeptide repeats 1	3.71566	2.57064e-29
ENSMUSG00000031782.16	Coq9	coenzyme Q9	1.66372	3.11209e-29
ENSMUSG00000022505.10	Emp2	epithelial membrane protein 2	-1.78602	3.2464e-29
ENSMUSG00000005873.7	Reep5	receptor accessory protein 5	1.75035	3.57537e-29
ENSMUSG00000003438.18	Timm50	translocase of inner mitochondrial membrane 50	1.98332	3.9162e-29
ENSMUSG00000118667.1	Ahnak2	AHNAK nucleoprotein 2	-1.41808	3.9532e-29
ENSMUSG00000025255.19	Zfhx4	zinc finger homeodomain 4	-1.65174	4.07582e-29
ENSMUSG00000026104.15	Stat1	signal transducer and activator of transcription 1	1.52277	7.47394e-29
ENSMUSG00000048007.5	Timm8a1	translocase of inner mitochondrial membrane 8A1	2.37685	7.56642e-29
ENSMUSG00000051223.15	Bzw1	basic leucine zipper and W2 domains 1	1.23102	7.89726e-29
ENSMUSG00000040112.10	Mrps35	mitochondrial ribosomal protein S35	1.69536	9.15863e-29
ENSMUSG00000046814.4	Gchfr	GTP cyclohydrolase I feedback regulator	2.66878	9.1765e-29
ENSMUSG00000026895.8	Ndufa8	NADH:ubiquinone oxidoreductase subunit A8	1.84119	1.06242e-28
ENSMUSG00000001542.8	Ell2	elongation factor for RNA polymerase II 2	1.62687	1.11571e-28
ENSMUSG00000028111.5	Ctsk	cathepsin K	-1.75797	1.18587e-28
ENSMUSG00000050708.17	Ftl1	ferritin light polypeptide 1	1.22212	1.38114e-28
ENSMUSG00000038112.16	AW551984	expressed sequence AW551984	-2.77413	1.60031e-28
ENSMUSG00000024665.9	Fads2	fatty acid desaturase 2	1.40421	1.74077e-28
ENSMUSG00000014303.14	Glis2	GLIS family zinc finger 2	-1.56887	1.87906e-28
ENSMUSG00000019210.11	Atp6v1e1	ATPase, H+ transporting, lysosomal V1 subunit E1	1.31935	1.9573e-28
ENSMUSG00000025089.16	Gfra1	glial cell line derived neurotrophic factor family receptor alpha 1	-2.60118	2.02779e-28
ENSMUSG00000034488.15	Edil3	EGF-like repeats and discoidin I-like domains 3	-1.89484	2.09148e-28
ENSMUSG00000051375.16	Pcdh1	protocadherin 1	2.36367	2.42609e-28
ENSMUSG00000007039.13	Ddah2	dimethylarginine dimethylaminohydrolase 2	-1.57857	2.45266e-28
ENSMUSG00000028364.16	Tnc	tenascin C	-2.0996	2.89732e-28
ENSMUSG00000031819.14	Emc8	ER membrane protein complex subunit 8	1.62783	2.96847e-28
ENSMUSG00000068699.13	Flnc	filamin C, gamma	-1.23024	2.98267e-28
ENSMUSG00000047205.13	Dusp18	dual specificity phosphatase 18	1.97994	3.43453e-28
ENSMUSG00000039485.9	Tspyl4	TSPY-like 4	-2.28445	3.64093e-28
ENSMUSG00000035934.17	Pknox2	Pbx/knotted 1 homeobox 2	-1.94379	3.93678e-28
ENSMUSG00000034566.11	Atp5h	ATP synthase, H+ transporting, mitochondrial F0 complex, subunit D	1.4869	4.48983e-28
ENSMUSG00000027374.13	Mrps5	mitochondrial ribosomal protein S5	1.64868	4.5726e-28
ENSMUSG00000033624.11	Pdpr	pyruvate dehydrogenase phosphatase regulatory subunit	1.50054	4.63731e-28
ENSMUSG00000071014.11	Ndufb6	NADH:ubiquinone oxidoreductase subunit B6	2.181	5.14822e-28
ENSMUSG00000062646.13	Ganc	glucosidase, alpha; neutral C	1.65598	5.2183e-28
ENSMUSG00000028381.9	Ugcg	UDP-glucose ceramide glucosyltransferase	-1.48028	5.41278e-28
ENSMUSG00000026667.15	Uhmk1	U2AF homology motif (UHM) kinase 1	1.31156	6.07376e-28
ENSMUSG00000051177.17	Plcb1	phospholipase C, beta 1	1.43656	6.16673e-28
ENSMUSG00000029722.16	Agfg2	ArfGAP with FG repeats 2	2.22624	6.42519e-28
ENSMUSG00000042156.17	Dzip1	DAZ interacting protein 1	-1.65735	6.6561e-28
ENSMUSG00000023307.15	Marchf5	membrane associated ring-CH-type finger 5	1.3266	7.02226e-28
ENSMUSG00000020538.16	Srebf1	sterol regulatory element binding transcription factor 1	1.47156	1.08403e-27
ENSMUSG00000031059.10	Ndufb11	NADH:ubiquinone oxidoreductase subunit B11	1.61052	1.10993e-27
ENSMUSG00000022548.15	Apod	apolipoprotein D	-1.34818	1.16148e-27
ENSMUSG00000025555.15	Farp1	FERM, RhoGEF (Arhgef) and pleckstrin domain protein 1 (chondrocyte-derived)	-1.61797	1.23938e-27
ENSMUSG00000032883.16	Acsl3	acyl-CoA synthetase long-chain family member 3	1.80204	1.28236e-27
ENSMUSG00000035105.6	Egln3	egl-9 family hypoxia-inducible factor 3	2.23981	1.35425e-27
ENSMUSG00000022330.6	Osr2	odd-skipped related 2	-2.17385	1.35925e-27
ENSMUSG00000060032.7	H2aj	H2J.A histone	1.9293	1.35986e-27
ENSMUSG00000040035.15	Disp2	dispatched RND tramsporter family member 2	3.71995	1.37656e-27
ENSMUSG00000031402.13	Mpp1	membrane protein, palmitoylated	1.3438	1.53227e-27
ENSMUSG00000028416.14	Bag1	BCL2-associated athanogene 1	1.55501	1.56934e-27
ENSMUSG00000032334.11	Loxl1	lysyl oxidase-like 1	-1.21473	1.59837e-27
ENSMUSG00000001911.17	Nfix	nuclear factor I/X	-1.2247	1.62209e-27
ENSMUSG00000038119.16	Cdon	cell adhesion molecule-related/down-regulated by oncogenes	-1.28856	1.63677e-27
ENSMUSG00000046079.17	Lrrc8d	leucine rich repeat containing 8D	1.9061	1.67239e-27
ENSMUSG00000031453.17	Rasa3	RAS p21 protein activator 3	1.28572	1.70878e-27
ENSMUSG00000002981.11	Clptm1	cleft lip and palate associated transmembrane protein 1	1.47573	1.7218e-27
ENSMUSG00000023915.6	Tnfrsf21	tumor necrosis factor receptor superfamily, member 21	-2.6529	1.85318e-27
ENSMUSG00000029775.15	Klhdc10	kelch domain containing 10	-1.22638	2.05714e-27
ENSMUSG00000074063.11	Osgin1	oxidative stress induced growth inhibitor 1	2.58713	2.37101e-27
ENSMUSG00000038279.11	Nop2	NOP2 nucleolar protein	1.43703	2.37826e-27
ENSMUSG00000012017.5	Scarf2	scavenger receptor class F, member 2	-1.53137	2.6739e-27
ENSMUSG00000015501.11	Hivep2	human immunodeficiency virus type I enhancer binding protein 2	-1.34446	2.88394e-27
ENSMUSG00000028975.17	Pex14	peroxisomal biogenesis factor 14	1.58489	3.07322e-27
ENSMUSG00000015133.18	Lrrk1	leucine-rich repeat kinase 1	-1.47927	3.94542e-27
ENSMUSG00000030314.17	Atg7	autophagy related 7	1.5693	4.41954e-27
ENSMUSG00000027386.10	Fbln7	fibulin 7	-3.73117	4.50004e-27
ENSMUSG00000096054.4	Syne1	spectrin repeat containing, nuclear envelope 1	-1.38178	4.65701e-27
ENSMUSG00000033453.9	Adamts15	a disintegrin-like and metallopeptidase (reprolysin type) with thrombospondin type 1 motif, 15	2.32348	4.79472e-27
ENSMUSG00000064215.14	Ifi27	interferon, alpha-inducible protein 27	1.26963	5.61845e-27
ENSMUSG00000019929.17	Dcn	decorin	-1.27332	5.63645e-27
ENSMUSG00000018659.13	Pnpo	pyridoxine 5'-phosphate oxidase	2.54138	6.284e-27
ENSMUSG00000040532.15	Abhd11	abhydrolase domain containing 11	2.20634	7.18561e-27
ENSMUSG00000050860.7	Phospho1	phosphatase, orphan 1	9.2078	7.18906e-27
ENSMUSG00000022629.18	Kif21a	kinesin family member 21A	2.21235	8.42568e-27
ENSMUSG00000028910.13	Mecr	mitochondrial trans-2-enoyl-CoA reductase	2.14988	8.84378e-27
ENSMUSG00000031503.14	Col4a2	collagen, type IV, alpha 2	1.18998	9.20196e-27
ENSMUSG00000034203.9	Chchd4	coiled-coil-helix-coiled-coil-helix domain containing 4	2.03587	9.41787e-27
ENSMUSG00000040511.15	Pvr	poliovirus receptor	2.42349	9.59807e-27
ENSMUSG00000038967.14	Pdk2	pyruvate dehydrogenase kinase, isoenzyme 2	1.95767	1.01564e-26
ENSMUSG00000041939.15	Mvk	mevalonate kinase	1.89826	1.04308e-26
ENSMUSG00000044807.14	Zfp354c	zinc finger protein 354C	-1.81623	1.06313e-26
ENSMUSG00000041324.15	Inhba	inhibin beta-A	-2.31986	1.21457e-26
ENSMUSG00000016262.15	Sertad4	SERTA domain containing 4	-1.74143	1.22042e-26
ENSMUSG00000021287.13	Xrcc3	X-ray repair complementing defective repair in Chinese hamster cells 3	2.61689	1.323e-26
ENSMUSG00000050379.16	Septin6	septin 6	1.49465	1.33454e-26
ENSMUSG00000022217.15	Emc9	ER membrane protein complex subunit 9	2.58413	1.33817e-26
ENSMUSG00000019437.18	Tlcd1	TLC domain containing 1	2.10995	1.38828e-26
ENSMUSG00000027513.12	Pck1	phosphoenolpyruvate carboxykinase 1, cytosolic	9.17108	1.39214e-26
ENSMUSG00000032348.7	Gsta4	glutathione S-transferase, alpha 4	1.62521	1.39487e-26
ENSMUSG00000026014.16	Raph1	Ras association (RalGDS/AF-6) and pleckstrin homology domains 1	1.60579	1.49226e-26
ENSMUSG00000002504.16	Slc9a3r2	solute carrier family 9 (sodium/hydrogen exchanger), member 3 regulator 2	-1.59965	1.51527e-26
ENSMUSG00000028743.8	Akr7a5	aldo-keto reductase family 7, member A5 (aflatoxin aldehyde reductase)	1.82721	1.57375e-26
ENSMUSG00000037316.10	Bag4	BCL2-associated athanogene 4	1.76207	1.77444e-26
ENSMUSG00000029659.17	Medag	mesenteric estrogen dependent adipogenesis	-1.50935	1.86131e-26
ENSMUSG00000027075.17	Slc43a1	solute carrier family 43, member 1	2.64408	1.87914e-26
ENSMUSG00000004044.10	Cavin1	caveolae associated 1	1.30411	1.90492e-26
ENSMUSG00000020775.14	Mrpl38	mitochondrial ribosomal protein L38	1.72816	2.04856e-26
ENSMUSG00000015980.15	Lrrc27	leucine rich repeat containing 27	3.08116	2.14107e-26
ENSMUSG00000025375.16	Aatk	apoptosis-associated tyrosine kinase	5.58469	2.14819e-26
ENSMUSG00000046756.11	Mrps7	mitchondrial ribosomal protein S7	1.61775	2.15531e-26
ENSMUSG00000032802.9	Srxn1	sulfiredoxin 1 homolog (S. cerevisiae)	1.46253	2.15875e-26
ENSMUSG00000037278.10	Tmem97	transmembrane protein 97	1.99413	2.29325e-26
ENSMUSG00000038301.16	Snx10	sorting nexin 10	1.50618	2.58631e-26
ENSMUSG00000036334.13	Igsf10	immunoglobulin superfamily, member 10	-2.07104	2.60601e-26
ENSMUSG00000028042.16	Zbtb7b	zinc finger and BTB domain containing 7B	1.65798	2.72065e-26
ENSMUSG00000005803.15	Sqor	sulfide quinone oxidoreductase	1.5186	2.79197e-26
ENSMUSG00000022577.18	Ly6h	lymphocyte antigen 6 complex, locus H	4.98983	3.05952e-26
ENSMUSG00000022246.15	Rai14	retinoic acid induced 14	-1.3726	3.09275e-26
ENSMUSG00000028945.10	Rheb	Ras homolog enriched in brain	1.51748	3.22307e-26
ENSMUSG00000028648.14	Ndufs5	NADH:ubiquinone oxidoreductase core subunit S5	1.70392	3.43978e-26
ENSMUSG00000021460.18	Auh	AU RNA binding protein/enoyl-coenzyme A hydratase	1.75795	3.44776e-26
ENSMUSG00000033863.3	Klf9	Kruppel-like factor 9	1.39071	3.7444e-26
ENSMUSG00000041112.18	Elmo1	engulfment and cell motility 1	-3.13937	3.9174e-26
ENSMUSG00000025212.18	Sfxn3	sideroflexin 3	-1.46856	4.40809e-26
ENSMUSG00000036138.17	Acaa1a	acetyl-Coenzyme A acyltransferase 1A	1.34284	4.45443e-26
ENSMUSG00000024480.10	Ap3s1	adaptor-related protein complex 3, sigma 1 subunit	1.48946	4.59983e-26
ENSMUSG00000038235.5	F11r	F11 receptor	3.83469	4.85372e-26
ENSMUSG00000079197.11	Psme2	proteasome (prosome, macropain) activator subunit 2 (PA28 beta)	1.46485	4.86182e-26
ENSMUSG00000031785.17	Adgrg1	adhesion G protein-coupled receptor G1	3.72048	5.08217e-26
ENSMUSG00000031875.8	Cmtm3	CKLF-like MARVEL transmembrane domain containing 3	-1.45553	6.08002e-26
ENSMUSG00000015222.19	Map2	microtubule-associated protein 2	-1.67171	6.58526e-26
ENSMUSG00000030042.16	Pole4	polymerase (DNA-directed), epsilon 4 (p12 subunit)	1.63379	6.84252e-26
ENSMUSG00000026494.13	Kif26b	kinesin family member 26B	-1.51222	7.09023e-26
ENSMUSG00000032440.14	Tgfbr2	transforming growth factor, beta receptor II	-1.35269	7.28781e-26
ENSMUSG00000020283.6	Pex13	peroxisomal biogenesis factor 13	1.80296	7.31985e-26
ENSMUSG00000054733.10	Msra	methionine sulfoxide reductase A	2.30914	9.20619e-26
ENSMUSG00000038400.16	Pmepa1	prostate transmembrane protein, androgen induced 1	-1.99425	1.11944e-25
ENSMUSG00000027171.11	Prrg4	proline rich Gla (G-carboxyglutamic acid) 4 (transmembrane)	3.15482	1.2554e-25
ENSMUSG00000030630.17	Fah	fumarylacetoacetate hydrolase	1.68226	1.4145e-25
ENSMUSG00000027367.17	Stard7	START domain containing 7	1.49975	1.67609e-25
ENSMUSG00000017778.15	Cox7c	cytochrome c oxidase subunit 7C	1.50059	1.77216e-25
ENSMUSG00000043895.7	S1pr2	sphingosine-1-phosphate receptor 2	-1.48183	2.04921e-25
ENSMUSG00000033610.17	Pank1	pantothenate kinase 1	2.15529	2.23627e-25
ENSMUSG00000063564.14	Col23a1	collagen, type XXIII, alpha 1	-1.9476	2.30518e-25
ENSMUSG00000015217.12	Hmgb3	high mobility group box 3	2.8156	2.4071e-25
ENSMUSG00000039883.6	Lrrc17	leucine rich repeat containing 17	-1.50017	2.50069e-25
ENSMUSG00000049680.18	Urgcp	upregulator of cell proliferation	1.3876	2.63458e-25
ENSMUSG00000021236.17	Entpd5	ectonucleoside triphosphate diphosphohydrolase 5	1.6704	3.00686e-25
ENSMUSG00000026042.17	Col5a2	collagen, type V, alpha 2	-1.17352	3.24926e-25
ENSMUSG00000060681.16	Slc9a6	solute carrier family 9 (sodium/hydrogen exchanger), member 6	1.56996	3.34223e-25
ENSMUSG00000035799.7	Twist1	twist basic helix-loop-helix transcription factor 1	-1.72013	3.35984e-25
ENSMUSG00000020087.6	Tysnd1	trypsin domain containing 1	1.65525	3.83693e-25
ENSMUSG00000050856.17	Atp5k	ATP synthase, H+ transporting, mitochondrial F1F0 complex, subunit E	1.9468	3.87676e-25
ENSMUSG00000029310.14	Nudt9	nudix (nucleoside diphosphate linked moiety X)-type motif 9	1.60264	4.28219e-25
ENSMUSG00000116165.2	Pdxp	pyridoxal (pyridoxine, vitamin B6) phosphatase	2.5703	4.31121e-25
ENSMUSG00000074151.14	Nlrc5	NLR family, CARD domain containing 5	2.90555	4.66718e-25
ENSMUSG00000019960.9	Dusp6	dual specificity phosphatase 6	2.40891	4.75709e-25
ENSMUSG00000031068.9	Glrx3	glutaredoxin 3	1.29973	4.81084e-25
ENSMUSG00000036427.6	Gpi1	glucose-6-phosphate isomerase 1	1.27518	5.03015e-25
ENSMUSG00000037204.8	Atg101	autophagy related 101	1.68293	5.0719e-25
ENSMUSG00000008575.18	Nfib	nuclear factor I/B	-1.10617	5.38098e-25
ENSMUSG00000031489.16	Adrb3	adrenergic receptor, beta 3	10.6707	5.94464e-25
ENSMUSG00000041548.5	Hspb8	heat shock protein 8	1.88107	6.52393e-25
ENSMUSG00000036707.17	Cab39	calcium binding protein 39	1.22992	6.77486e-25
ENSMUSG00000024683.7	Mrpl16	mitochondrial ribosomal protein L16	1.801	7.22965e-25
ENSMUSG00000022665.16	Ccdc80	coiled-coil domain containing 80	1.64074	7.30337e-25
ENSMUSG00000017146.13	Brca1	breast cancer 1, early onset	2.49191	7.3537e-25
ENSMUSG00000026235.15	Epha4	Eph receptor A4	-2.23488	7.53666e-25
ENSMUSG00000028622.12	Mrpl37	mitochondrial ribosomal protein L37	1.59992	8.04589e-25
ENSMUSG00000020656.17	Grhl1	grainyhead like transcription factor 1	4.17544	8.17334e-25
ENSMUSG00000023951.19	Vegfa	vascular endothelial growth factor A	1.22037	8.24732e-25
ENSMUSG00000001056.4	Nhp2	NHP2 ribonucleoprotein	1.81734	8.52864e-25
ENSMUSG00000031938.16	4931406C07Rik	RIKEN cDNA 4931406C07 gene	1.41784	8.96966e-25
ENSMUSG00000079523.9	Tmsb10	thymosin, beta 10	-1.59316	9.15439e-25
ENSMUSG00000026750.7	Psmb7	proteasome (prosome, macropain) subunit, beta type 7	1.31753	9.6086e-25
ENSMUSG00000064202.16	Spata6l	spermatogenesis associated 6 like	4.04512	9.65086e-25
ENSMUSG00000026709.11	Dars2	aspartyl-tRNA synthetase 2 (mitochondrial)	1.83963	1.04841e-24
ENSMUSG00000068122.11	Agtr2	angiotensin II receptor, type 2	-2.45619	1.12682e-24
ENSMUSG00000021318.16	Gli3	GLI-Kruppel family member GLI3	-1.61561	1.23723e-24
ENSMUSG00000022235.16	Cmbl	carboxymethylenebutenolidase-like (Pseudomonas)	5.34284	1.30847e-24
ENSMUSG00000038068.16	Rnf144b	ring finger protein 144B	8.84935	1.40587e-24
ENSMUSG00000029761.17	Cald1	caldesmon 1	-1.09096	1.5258e-24
ENSMUSG00000025355.8	Mmp19	matrix metallopeptidase 19	1.35864	1.53406e-24
ENSMUSG00000024247.15	Pkdcc	protein kinase domain containing, cytoplasmic	1.58158	1.56585e-24
ENSMUSG00000062980.16	Cped1	cadherin-like and PC-esterase domain containing 1	-1.14329	1.80827e-24
ENSMUSG00000025007.14	Aldh18a1	aldehyde dehydrogenase 18 family, member A1	-1.28092	1.9195e-24
ENSMUSG00000050144.14	Slc25a44	solute carrier family 25, member 44	1.50237	2.07119e-24
ENSMUSG00000021703.10	Serinc5	serine incorporator 5	-1.62107	2.19645e-24
ENSMUSG00000059493.14	Nhs	NHS actin remodeling regulator	-1.58532	2.24261e-24
ENSMUSG00000031532.8	Saraf	store-operated calcium entry-associated regulatory factor	1.29599	2.51616e-24
ENSMUSG00000043099.5	Hic1	hypermethylated in cancer 1	-2.05805	2.54026e-24
ENSMUSG00000001983.8	Taco1	translational activator of mitochondrially encoded cytochrome c oxidase I	2.32319	2.66141e-24
ENSMUSG00000025825.13	Iscu	iron-sulfur cluster assembly enzyme	1.44779	2.92631e-24
ENSMUSG00000031838.11	Ifi30	interferon gamma inducible protein 30	-1.82175	3.03605e-24
ENSMUSG00000027339.16	Rassf2	Ras association (RalGDS/AF-6) domain family member 2	-1.36892	3.07127e-24
ENSMUSG00000015766.15	Eps8	epidermal growth factor receptor pathway substrate 8	-1.61392	3.70982e-24
ENSMUSG00000029434.13	Vps33a	VPS33A CORVET/HOPS core subunit	1.3169	4.21652e-24
ENSMUSG00000003644.18	Rps6ka1	ribosomal protein S6 kinase polypeptide 1	2.46016	4.41915e-24
ENSMUSG00000058070.15	Eml1	echinoderm microtubule associated protein like 1	-1.36667	4.47588e-24
ENSMUSG00000049800.14	Sertad2	SERTA domain containing 2	-1.50732	4.61967e-24
ENSMUSG00000026880.12	Stom	stomatin	1.51808	4.71468e-24
ENSMUSG00000055900.15	Tmem69	transmembrane protein 69	2.11608	4.93151e-24
ENSMUSG00000024758.16	Rtn3	reticulon 3	1.10111	7.21782e-24
ENSMUSG00000020251.14	Glt8d2	glycosyltransferase 8 domain containing 2	-1.88222	7.29111e-24
ENSMUSG00000070780.12	Rbm47	RNA binding motif protein 47	7.78034	8.11814e-24
ENSMUSG00000021751.14	Acox2	acyl-Coenzyme A oxidase 2, branched chain	6.71404	8.44727e-24
ENSMUSG00000037568.13	Vash2	vasohibin 2	-2.11182	8.6235e-24
ENSMUSG00000038690.16	Atp5j2	ATP synthase, H+ transporting, mitochondrial F0 complex, subunit F2	1.68961	8.79255e-24
ENSMUSG00000026096.15	Osgepl1	O-sialoglycoprotein endopeptidase-like 1	2.15586	9.12552e-24
ENSMUSG00000019975.13	Ikbip	IKBKB interacting protein	-1.30053	9.33015e-24
ENSMUSG00000024851.15	Pitpnm1	phosphatidylinositol transfer protein, membrane-associated 1	1.48375	9.53095e-24
ENSMUSG00000043687.17	1190005I06Rik	RIKEN cDNA 1190005I06 gene	3.16663	9.57622e-24
ENSMUSG00000024897.10	Apba1	amyloid beta (A4) precursor protein binding, family A, member 1	-1.67452	1.02818e-23
ENSMUSG00000035493.11	Tgfbi	transforming growth factor, beta induced	-2.31239	1.04607e-23
ENSMUSG00000026586.17	Prrx1	paired related homeobox 1	-1.0947	1.21104e-23
ENSMUSG00000027900.16	Dram2	DNA-damage regulated autophagy modulator 2	1.65199	1.24217e-23
ENSMUSG00000041540.17	Sox5	SRY (sex determining region Y)-box 5	2.65255	1.32188e-23
ENSMUSG00000029650.11	Slc46a3	solute carrier family 46, member 3	3.0711	1.37686e-23
ENSMUSG00000034463.5	Scara3	scavenger receptor class A, member 3	-1.37999	1.38478e-23
ENSMUSG00000051748.3	Wfdc21	WAP four-disulfide core domain 21	10.3622	1.5384e-23
ENSMUSG00000055435.7	Maf	avian musculoaponeurotic fibrosarcoma oncogene homolog	-1.13925	1.58775e-23
ENSMUSG00000042804.14	Gpr153	G protein-coupled receptor 153	-1.27308	1.75032e-23
ENSMUSG00000043079.18	Synpo	synaptopodin	-1.55633	1.84165e-23
ENSMUSG00000021361.8	Tmem14c	transmembrane protein 14C	1.54265	1.96248e-23
ENSMUSG00000054871.6	Tmem158	transmembrane protein 158	-2.86954	2.27215e-23
ENSMUSG00000071176.11	Arhgef10	Rho guanine nucleotide exchange factor (GEF) 10	-1.2366	2.31348e-23
ENSMUSG00000044968.17	Napepld	N-acyl phosphatidylethanolamine phospholipase D	1.98996	2.46537e-23
ENSMUSG00000050052.13	Tdrp	testis development related protein	2.83365	2.70827e-23
ENSMUSG00000035877.18	Zhx3	zinc fingers and homeoboxes 3	1.22276	2.76296e-23
ENSMUSG00000044365.16	Cxxc4	CXXC finger 4	-2.30849	3.03885e-23
ENSMUSG00000029207.17	Apbb2	amyloid beta (A4) precursor protein-binding, family B, member 2	-1.17338	3.05448e-23
ENSMUSG00000049940.8	Pgrmc2	progesterone receptor membrane component 2	1.26135	3.06496e-23
ENSMUSG00000037306.14	Man1c1	mannosidase, alpha, class 1C, member 1	-1.4714	3.17046e-23
ENSMUSG00000032388.8	Spg21	SPG21, maspardin	1.49194	3.36487e-23
ENSMUSG00000033917.16	Gde1	glycerophosphodiester phosphodiesterase 1	1.64285	3.43506e-23
ENSMUSG00000030591.18	Psmd8	proteasome (prosome, macropain) 26S subunit, non-ATPase, 8	1.28509	3.45237e-23
ENSMUSG00000022419.17	Deptor	DEP domain containing MTOR-interacting protein	1.19141	3.46985e-23
ENSMUSG00000003809.15	Gcdh	glutaryl-Coenzyme A dehydrogenase	1.70327	3.63295e-23
ENSMUSG00000027074.15	Slc43a3	solute carrier family 43, member 3	2.00122	3.68886e-23
ENSMUSG00000073676.5	Hspe1	heat shock protein 1 (chaperonin 10)	1.45969	3.68907e-23
ENSMUSG00000022098.11	Bmp1	bone morphogenetic protein 1	-1.18439	4.04101e-23
ENSMUSG00000020402.12	Vdac1	voltage-dependent anion channel 1	1.14725	4.07781e-23
ENSMUSG00000035186.7	Ubd	ubiquitin D	6.09009	4.34799e-23
ENSMUSG00000052214.10	Opa3	optic atrophy 3	1.60568	4.56379e-23
ENSMUSG00000003531.16	Dgcr6	DiGeorge syndrome critical region gene 6	1.57081	4.79035e-23
ENSMUSG00000002416.14	Ndufb2	NADH:ubiquinone oxidoreductase subunit B2	1.64506	5.07379e-23
ENSMUSG00000023092.17	Fhl1	four and a half LIM domains 1	1.74577	5.16328e-23
ENSMUSG00000048388.4	Fam171b	family with sequence similarity 171, member B	-2.30483	5.48028e-23
ENSMUSG00000001642.19	Akr1b3	aldo-keto reductase family 1, member B3 (aldose reductase)	1.35729	5.66166e-23
ENSMUSG00000027439.10	Gzf1	GDNF-inducible zinc finger protein 1	1.33097	5.72899e-23
ENSMUSG00000021241.8	Isca2	iron-sulfur cluster assembly 2	2.05213	6.27933e-23
ENSMUSG00000001123.16	Lgals9	lectin, galactose binding, soluble 9	-1.36577	6.53988e-23
ENSMUSG00000053907.11	Mat2a	methionine adenosyltransferase II, alpha	1.05459	6.7013e-23
ENSMUSG00000032220.11	Myo1e	myosin IE	-1.91952	6.7341e-23
ENSMUSG00000019843.15	Fyn	Fyn proto-oncogene	-1.5336	6.77461e-23
ENSMUSG00000038463.9	Olfml2b	olfactomedin-like 2B	-1.22564	7.37146e-23
ENSMUSG00000024228.13	Nudt12	nudix (nucleoside diphosphate linked moiety X)-type motif 12	1.73634	7.40234e-23
ENSMUSG00000018102.6	H2bc4	H2B clustered histone 4	1.35576	7.80099e-23
ENSMUSG00000056234.16	Ncoa4	nuclear receptor coactivator 4	1.23285	8.21309e-23
ENSMUSG00000001891.17	Ugp2	UDP-glucose pyrophosphorylase 2	1.19266	8.66469e-23
ENSMUSG00000024644.18	Cndp2	CNDP dipeptidase 2 (metallopeptidase M20 family)	1.26962	8.76685e-23
ENSMUSG00000079017.4	Ifi27l2a	interferon, alpha-inducible protein 27 like 2A	2.83101	8.84448e-23
ENSMUSG00000036591.17	Arhgap21	Rho GTPase activating protein 21	-1.51378	1.08254e-22
ENSMUSG00000068921.15	Dap3	death associated protein 3	1.4616	1.15456e-22
ENSMUSG00000031119.5	Gpc4	glypican 4	-1.14639	1.19536e-22
ENSMUSG00000044221.15	Grsf1	G-rich RNA sequence binding factor 1	1.29532	1.23431e-22
ENSMUSG00000049969.4	Plekhf2	pleckstrin homology domain containing, family F (with FYVE domain) member 2	1.88669	1.25091e-22
ENSMUSG00000072235.7	Tuba1a	tubulin, alpha 1A	-1.24581	1.36484e-22
ENSMUSG00000039384.9	Dusp10	dual specificity phosphatase 10	1.81733	1.40672e-22
ENSMUSG00000022817.16	Itgb5	integrin beta 5	-1.3971	1.49637e-22
ENSMUSG00000081534.4	Slc48a1	solute carrier family 48 (heme transporter), member 1	1.13699	1.52899e-22
ENSMUSG00000018927.4	Ccl6	chemokine (C-C motif) ligand 6	3.85702	1.60246e-22
ENSMUSG00000018446.9	C1qbp	complement component 1, q subcomponent binding protein	1.44909	1.77931e-22
ENSMUSG00000036596.7	Cpz	carboxypeptidase Z	-3.79005	1.90923e-22
ENSMUSG00000039116.8	Adgrg6	adhesion G protein-coupled receptor G6	-2.45309	1.93183e-22
ENSMUSG00000020695.15	Mrc2	mannose receptor, C type 2	-1.14207	2.20758e-22
ENSMUSG00000068794.8	Col28a1	collagen, type XXVIII, alpha 1	-2.35408	2.34268e-22
ENSMUSG00000025347.5	Mettl7b	methyltransferase like 7B	7.56541	2.44437e-22
ENSMUSG00000056162.15	Cndp1	carnosine dipeptidase 1 (metallopeptidase M20 family)	4.19092	2.65919e-22
ENSMUSG00000021359.17	Tfap2a	transcription factor AP-2, alpha	-2.02362	2.73493e-22
ENSMUSG00000026547.16	Tagln2	transgelin 2	-1.42908	2.8821e-22
ENSMUSG00000037062.14	Sh3glb1	SH3-domain GRB2-like B1 (endophilin)	1.09934	3.19827e-22
ENSMUSG00000034271.17	Jdp2	Jun dimerization protein 2	-1.52024	3.64744e-22
ENSMUSG00000050043.17	Tmx2	thioredoxin-related transmembrane protein 2	1.37412	3.74694e-22
ENSMUSG00000042719.18	Naa25	N(alpha)-acetyltransferase 25, NatB auxiliary subunit	1.33534	4.10868e-22
ENSMUSG00000074918.5	Inafm2	InaF motif containing 2	1.51449	4.77111e-22
ENSMUSG00000034903.19	Cobll1	Cobl-like 1	1.57227	4.89576e-22
ENSMUSG00000025817.13	Nudt5	nudix (nucleoside diphosphate linked moiety X)-type motif 5	1.63273	4.99841e-22
ENSMUSG00000061353.12	Cxcl12	chemokine (C-X-C motif) ligand 12	-0.982165	5.14095e-22
ENSMUSG00000006273.15	Atp6v1b2	ATPase, H+ transporting, lysosomal V1 subunit B2	1.15704	5.27186e-22
ENSMUSG00000022676.8	Snai2	snail family zinc finger 2	-1.52242	5.45938e-22
ENSMUSG00000030187.16	Klra2	killer cell lectin-like receptor, subfamily A, member 2	3.97354	6.01786e-22
ENSMUSG00000024456.17	Diaph1	diaphanous related formin 1	1.24441	6.84363e-22
ENSMUSG00000039087.18	Rreb1	ras responsive element binding protein 1	1.17374	8.35823e-22
ENSMUSG00000028862.7	Map3k6	mitogen-activated protein kinase kinase kinase 6	1.86318	9.25305e-22
ENSMUSG00000076431.5	Sox4	SRY (sex determining region Y)-box 4	-1.10149	9.98909e-22
ENSMUSG00000047250.14	Ptgs1	prostaglandin-endoperoxide synthase 1	-1.40689	1.04018e-21
ENSMUSG00000028636.15	Ppcs	phosphopantothenoylcysteine synthetase	2.00392	1.06214e-21
ENSMUSG00000070730.12	Rmdn3	regulator of microtubule dynamics 3	1.42665	1.06267e-21
ENSMUSG00000056025.13	Clca3a1	chloride channel accessory 3A1	1.30669	1.09061e-21
ENSMUSG00000041734.16	Kirrel	kirre like nephrin family adhesion molecule 1	-1.12072	1.10229e-21
ENSMUSG00000020902.13	Ntn1	netrin 1	-1.3075	1.10657e-21
ENSMUSG00000078652.10	Psme3	proteaseome (prosome, macropain) activator subunit 3 (PA28 gamma, Ki)	1.22381	1.14736e-21
ENSMUSG00000020027.19	Socs2	suppressor of cytokine signaling 2	-1.5102	1.17227e-21
ENSMUSG00000042428.7	Mgat3	mannoside acetylglucosaminyltransferase 3	-1.54242	1.18599e-21
ENSMUSG00000113902.2	Ndufb1	NADH:ubiquinone oxidoreductase subunit B1	1.72157	1.18982e-21
ENSMUSG00000042289.12	Hsd3b7	hydroxy-delta-5-steroid dehydrogenase, 3 beta- and steroid delta-isomerase 7	1.7269	1.19787e-21
ENSMUSG00000037710.9	Cisd1	CDGSH iron sulfur domain 1	2.01845	1.35166e-21
ENSMUSG00000038028.10	Tigar	Trp53 induced glycolysis regulatory phosphatase	2.16908	1.38404e-21
ENSMUSG00000022032.15	Scara5	scavenger receptor class A, member 5	-1.06581	1.53097e-21
ENSMUSG00000020105.10	Lrig3	leucine-rich repeats and immunoglobulin-like domains 3	-1.26875	1.55924e-21
ENSMUSG00000040550.18	Otud6b	OTU domain containing 6B	1.46072	1.56144e-21
ENSMUSG00000016257.16	Prelid3b	PRELI domain containing 3B	1.41591	1.59985e-21
ENSMUSG00000003847.17	Nfat5	nuclear factor of activated T cells 5	-1.0478	1.629e-21
ENSMUSG00000033033.11	Calhm2	calcium homeostasis modulator family member 2	-1.88978	1.70199e-21
ENSMUSG00000001445.11	Mrpl10	mitochondrial ribosomal protein L10	1.28343	1.70834e-21
ENSMUSG00000021771.15	Vdac2	voltage-dependent anion channel 2	1.11378	1.73835e-21
ENSMUSG00000024759.15	Atl3	atlastin GTPase 3	1.01719	1.79825e-21
ENSMUSG00000030116.15	Mfap5	microfibrillar associated protein 5	-3.11151	1.84814e-21
ENSMUSG00000026103.15	Gls	glutaminase	-1.13726	1.89423e-21
ENSMUSG00000034659.15	Tmem109	transmembrane protein 109	1.21203	1.8979e-21
ENSMUSG00000045092.9	S1pr1	sphingosine-1-phosphate receptor 1	-2.39055	1.98493e-21
ENSMUSG00000037049.10	Smpd1	sphingomyelin phosphodiesterase 1, acid lysosomal	1.30079	1.99648e-21
ENSMUSG00000041653.6	Pnpla3	patatin-like phospholipase domain containing 3	13.7766	2.13045e-21
ENSMUSG00000020142.13	Slc1a4	solute carrier family 1 (glutamate/neutral amino acid transporter), member 4	-1.52449	2.19384e-21
ENSMUSG00000026005.16	Rpe	ribulose-5-phosphate-3-epimerase	1.4167	2.22212e-21
ENSMUSG00000041132.12	N4bp2l1	NEDD4 binding protein 2-like 1	2.50467	2.48015e-21
ENSMUSG00000030654.10	Arl6ip1	ADP-ribosylation factor-like 6 interacting protein 1	1.45446	2.50964e-21
ENSMUSG00000025268.16	Maged2	MAGE family member D2	-1.15109	2.55356e-21
ENSMUSG00000047434.15	Xxylt1	xyloside xylosyltransferase 1	-1.2482	2.55537e-21
ENSMUSG00000028013.17	Ppa2	pyrophosphatase (inorganic) 2	1.57502	2.72705e-21
ENSMUSG00000023087.16	Noct	nocturnin	1.09192	2.83498e-21
ENSMUSG00000033059.8	Pygb	brain glycogen phosphorylase	1.26489	2.96618e-21
ENSMUSG00000035279.9	Ssc5d	scavenger receptor cysteine rich family, 5 domains	-1.63422	2.9738e-21
ENSMUSG00000051256.11	Jagn1	jagunal homolog 1	1.62055	3.28227e-21
ENSMUSG00000020432.13	Tcn2	transcobalamin 2	2.11658	3.36722e-21
ENSMUSG00000057388.10	Mrpl18	mitochondrial ribosomal protein L18	1.46735	3.61115e-21
ENSMUSG00000020620.15	Abca8b	ATP-binding cassette, sub-family A (ABC1), member 8b	-1.75737	3.71054e-21
ENSMUSG00000011256.17	Adam19	a disintegrin and metallopeptidase domain 19 (meltrin beta)	-1.36628	3.76608e-21
ENSMUSG00000075592.11	Nynrin	NYN domain and retroviral integrase containing	-1.17905	3.80588e-21
ENSMUSG00000039982.9	Dtx4	deltex 4, E3 ubiquitin ligase	1.24406	4.35743e-21
ENSMUSG00000031375.18	Bgn	biglycan	-1.03484	5.15461e-21
ENSMUSG00000042642.14	Flad1	flavin adenine dinucleotide synthetase 1	1.65896	5.99141e-21
ENSMUSG00000031245.9	Hmgn5	high-mobility group nucleosome binding domain 5	2.56776	6.24186e-21
ENSMUSG00000049327.18	Kmt5a	lysine methyltransferase 5A	1.19966	6.39009e-21
ENSMUSG00000026384.14	Ptpn4	protein tyrosine phosphatase, non-receptor type 4	1.34763	7.57393e-21
ENSMUSG00000033436.14	Armcx2	armadillo repeat containing, X-linked 2	-1.22584	7.81486e-21
ENSMUSG00000026566.16	Mpzl1	myelin protein zero-like 1	-1.47064	8.45128e-21
ENSMUSG00000015806.13	Qdpr	quinoid dihydropteridine reductase	1.40642	8.75673e-21
ENSMUSG00000041798.16	Gck	glucokinase	13.5723	8.8077e-21
ENSMUSG00000026926.15	Pmpca	peptidase (mitochondrial processing) alpha	1.25273	8.89891e-21
ENSMUSG00000003352.15	Cacnb3	calcium channel, voltage-dependent, beta 3 subunit	-1.46936	9.06514e-21
ENSMUSG00000014294.5	Ndufa2	NADH:ubiquinone oxidoreductase subunit A2	1.48514	9.9873e-21
ENSMUSG00000065979.13	Cpped1	calcineurin-like phosphoesterase domain containing 1	1.19079	1.051e-20
ENSMUSG00000041632.8	Mrps27	mitochondrial ribosomal protein S27	1.70216	1.12547e-20
ENSMUSG00000002781.20	Tmem143	transmembrane protein 143	1.77763	1.14292e-20
ENSMUSG00000042834.16	Nrep	neuronal regeneration related protein	-1.24751	1.23656e-20
ENSMUSG00000060703.13	Cd302	CD302 antigen	1.27582	1.25077e-20
ENSMUSG00000034449.8	Dhrs11	dehydrogenase/reductase (SDR family) member 11	1.927	1.30592e-20
ENSMUSG00000048915.13	Efna5	ephrin A5	-1.59995	1.30596e-20
ENSMUSG00000034573.15	Ptpn13	protein tyrosine phosphatase, non-receptor type 13	-1.4277	1.33905e-20
ENSMUSG00000036880.11	Acaa2	acetyl-Coenzyme A acyltransferase 2 (mitochondrial 3-oxoacyl-Coenzyme A thiolase)	1.33324	1.46295e-20
ENSMUSG00000001627.13	Ifrd1	interferon-related developmental regulator 1	1.25113	1.53268e-20
ENSMUSG00000028076.13	Cd1d1	CD1d1 antigen	2.12078	1.69354e-20
ENSMUSG00000026127.14	Imp4	IMP4, U3 small nucleolar ribonucleoprotein	1.42299	1.70671e-20
ENSMUSG00000029507.17	Pus1	pseudouridine synthase 1	1.63134	1.84554e-20
ENSMUSG00000048546.9	Tob2	transducer of ERBB2, 2	1.33545	1.86023e-20
ENSMUSG00000022912.9	Pros1	protein S (alpha)	-1.33239	1.95326e-20
ENSMUSG00000029338.14	Antxr2	anthrax toxin receptor 2	-1.33584	1.99965e-20
ENSMUSG00000037788.15	Vopp1	vesicular, overexpressed in cancer, prosurvival protein 1	-1.46971	2.02969e-20
ENSMUSG00000055172.11	C1ra	complement component 1, r subcomponent A	-1.12758	2.13702e-20
ENSMUSG00000045838.9	Ccdc9b	coiled-coil domain containing 9B	1.4213	2.27283e-20
ENSMUSG00000028645.12	Slc2a1	solute carrier family 2 (facilitated glucose transporter), member 1	-1.29566	2.76792e-20
ENSMUSG00000024038.18	Ndufv3	NADH:ubiquinone oxidoreductase core subunit V3	1.44617	2.83739e-20
ENSMUSG00000020219.8	Timm13	translocase of inner mitochondrial membrane 13	1.62464	2.87163e-20
ENSMUSG00000027076.11	Timm10	translocase of inner mitochondrial membrane 10	2.20396	2.98678e-20
ENSMUSG00000051331.17	Cacna1c	calcium channel, voltage-dependent, L type, alpha 1C subunit	-1.99369	3.26586e-20
ENSMUSG00000001211.16	Agpat3	1-acylglycerol-3-phosphate O-acyltransferase 3	1.20648	3.3111e-20
ENSMUSG00000031283.17	Chrdl1	chordin-like 1	-1.47306	3.34024e-20
ENSMUSG00000045569.8	Mc2r	melanocortin 2 receptor	8.09581	3.3606e-20
ENSMUSG00000038894.8	Irs2	insulin receptor substrate 2	1.30817	3.55165e-20
ENSMUSG00000015176.12	Nolc1	nucleolar and coiled-body phosphoprotein 1	1.27522	3.68519e-20
ENSMUSG00000070348.6	Ccnd1	cyclin D1	-1.11139	3.73879e-20
ENSMUSG00000022565.16	Plec	plectin	-1.35039	3.82552e-20
ENSMUSG00000031925.18	Maml2	mastermind like transcriptional coactivator 2	-1.26132	4.08717e-20
ENSMUSG00000022425.17	Enpp2	ectonucleotide pyrophosphatase/phosphodiesterase 2	1.68912	4.16758e-20
ENSMUSG00000038422.3	Hdhd3	haloacid dehalogenase-like hydrolase domain containing 3	2.26524	4.33754e-20
ENSMUSG00000048285.10	Frmd6	FERM domain containing 6	-1.0407	4.37756e-20
ENSMUSG00000066607.6	Insyn1	inhibitory synaptic factor 1	-1.81984	4.50337e-20
ENSMUSG00000018566.15	Slc2a4	solute carrier family 2 (facilitated glucose transporter), member 4	8.75111	4.52612e-20
ENSMUSG00000019864.15	Rtn4ip1	reticulon 4 interacting protein 1	1.96406	4.64335e-20
ENSMUSG00000022401.13	Xpnpep3	X-prolyl aminopeptidase 3, mitochondrial	1.41315	4.6584e-20
ENSMUSG00000035021.14	Baz1a	bromodomain adjacent to zinc finger domain 1A	1.87257	5.1689e-20
ENSMUSG00000038084.17	Opa1	OPA1, mitochondrial dynamin like GTPase	1.20959	5.59304e-20
ENSMUSG00000069920.11	B3gnt9	UDP-GlcNAc:betaGal beta-1,3-N-acetylglucosaminyltransferase 9	-1.1849	5.78617e-20
ENSMUSG00000035637.15	Grhpr	glyoxylate reductase/hydroxypyruvate reductase	1.8751	5.90036e-20
ENSMUSG00000020086.7	Macroh2a2	macroH2A.2 histone	-2.12985	6.31911e-20
ENSMUSG00000042712.11	Tceal9	transcription elongation factor A like 9	-1.22514	6.34105e-20
ENSMUSG00000021725.10	Parp8	poly (ADP-ribose) polymerase family, member 8	-1.65979	6.40088e-20
ENSMUSG00000033416.16	Gucd1	guanylyl cyclase domain containing 1	1.33554	7.01781e-20
ENSMUSG00000029050.16	Ski	ski sarcoma viral oncogene homolog (avian)	-1.11125	7.11332e-20
ENSMUSG00000030341.18	Tnfrsf1a	tumor necrosis factor receptor superfamily, member 1a	1.11254	8.16589e-20
ENSMUSG00000019278.6	Dpep1	dipeptidase 1	1.48677	8.24333e-20
ENSMUSG00000024620.12	Pdgfrb	platelet derived growth factor receptor, beta polypeptide	-1.0047	9.08545e-20
ENSMUSG00000021876.16	Rnase4	ribonuclease, RNase A family 4	-1.19703	9.37825e-20
ENSMUSG00000001555.11	Fkbp10	FK506 binding protein 10	-1.10202	1.02432e-19
ENSMUSG00000059796.17	Eif4a1	eukaryotic translation initiation factor 4A1	1.0338	1.06238e-19
ENSMUSG00000032086.13	Bace1	beta-site APP cleaving enzyme 1	-1.06291	1.1379e-19
ENSMUSG00000043162.8	Pyurf	Pigy upstream reading frame	1.37354	1.14574e-19
ENSMUSG00000024640.10	Psat1	phosphoserine aminotransferase 1	1.07226	1.17711e-19
ENSMUSG00000040883.19	Tmem205	transmembrane protein 205	1.97407	1.18969e-19
ENSMUSG00000022754.7	Tmem45a	transmembrane protein 45a	-1.54218	1.40411e-19
ENSMUSG00000024909.16	Efemp2	epidermal growth factor-containing fibulin-like extracellular matrix protein 2	-1.18834	1.56835e-19
ENSMUSG00000022687.13	Boc	biregional cell adhesion molecule-related/down-regulated by oncogenes (Cdon) binding protein	-1.08392	1.73377e-19
ENSMUSG00000068749.10	Psma5	proteasome subunit alpha 5	1.29509	1.7637e-19
ENSMUSG00000022636.14	Alcam	activated leukocyte cell adhesion molecule	-1.29662	1.79821e-19
ENSMUSG00000020936.9	Nmt1	N-myristoyltransferase 1	1.12125	1.91278e-19
ENSMUSG00000003382.19	Etv3	ets variant 3	1.30446	2.10912e-19
ENSMUSG00000031708.18	Tecr	trans-2,3-enoyl-CoA reductase	1.18133	2.19378e-19
ENSMUSG00000048142.10	Nat8l	N-acetyltransferase 8-like	10.1161	2.3796e-19
ENSMUSG00000028152.11	Tspan5	tetraspanin 5	-1.52685	2.47313e-19
ENSMUSG00000052957.9	Gas1	growth arrest specific 1	-1.11801	2.52658e-19
ENSMUSG00000019564.13	Arid3a	AT rich interactive domain 3A (BRIGHT-like)	1.91141	2.5386e-19
ENSMUSG00000028140.14	Mrpl9	mitochondrial ribosomal protein L9	1.40625	2.69439e-19
ENSMUSG00000069833.14	Ahnak	AHNAK nucleoprotein (desmoyokin)	-0.933397	2.78001e-19
ENSMUSG00000019467.16	Arhgef25	Rho guanine nucleotide exchange factor (GEF) 25	-1.20617	2.89244e-19
ENSMUSG00000001156.10	Mxd1	MAX dimerization protein 1	1.42866	2.97059e-19
ENSMUSG00000032724.6	Abtb2	ankyrin repeat and BTB (POZ) domain containing 2	-1.52625	3.05536e-19
ENSMUSG00000033705.18	Stard9	START domain containing 9	-1.3599	3.42911e-19
ENSMUSG00000039041.16	Adrm1	adhesion regulating molecule 1 26S proteasome ubiquitin receptor	1.25626	3.79462e-19
ENSMUSG00000028261.14	Ndufaf4	NADH:ubiquinone oxidoreductase complex assembly factor 4	2.0884	3.79971e-19
ENSMUSG00000035936.7	Aldh5a1	aldhehyde dehydrogenase family 5, subfamily A1	2.39608	4.26569e-19
ENSMUSG00000028073.16	Pear1	platelet endothelial aggregation receptor 1	-1.26769	4.42058e-19
ENSMUSG00000051790.16	Nlgn2	neuroligin 2	-1.50038	4.8739e-19
ENSMUSG00000035772.12	Mrps2	mitochondrial ribosomal protein S2	1.60036	5.1918e-19
ENSMUSG00000022892.12	App	amyloid beta (A4) precursor protein	-0.966302	5.71866e-19
ENSMUSG00000047181.13	Samd14	sterile alpha motif domain containing 14	-1.5529	5.85371e-19
ENSMUSG00000039842.16	Mcph1	microcephaly, primary autosomal recessive 1	1.64687	6.02819e-19
ENSMUSG00000022807.10	Osbpl11	oxysterol binding protein-like 11	1.18479	6.27208e-19
ENSMUSG00000038521.18	C1s1	complement component 1, s subcomponent 1	-1.09046	6.29077e-19
ENSMUSG00000075702.11	Selenom	selenoprotein M	-1.60685	6.35319e-19
ENSMUSG00000032667.18	Pon2	paraoxonase 2	1.68726	6.57997e-19
ENSMUSG00000021884.19	Hacl1	2-hydroxyacyl-CoA lyase 1	1.71967	6.64764e-19
ENSMUSG00000036103.10	Colec12	collectin sub-family member 12	-0.979386	6.72614e-19
ENSMUSG00000021186.10	Fbln5	fibulin 5	-1.245	7.02649e-19
ENSMUSG00000020277.11	Pfkl	phosphofructokinase, liver, B-type	1.19705	7.10145e-19
ENSMUSG00000040688.17	Tbl3	transducin (beta)-like 3	1.5032	7.45101e-19
ENSMUSG00000029432.13	Nipsnap2	nipsnap homolog 2	1.21408	7.47677e-19
ENSMUSG00000039176.18	Polg	polymerase (DNA directed), gamma	1.25965	7.66206e-19
ENSMUSG00000015846.16	Rxra	retinoid X receptor alpha	1.01928	8.07405e-19
ENSMUSG00000025085.17	Ablim1	actin-binding LIM protein 1	-1.38651	8.16764e-19
ENSMUSG00000002068.17	Ccne1	cyclin E1	2.05475	8.34231e-19
ENSMUSG00000045211.6	Nudt18	nudix (nucleoside diphosphate linked moiety X)-type motif 18	1.88708	8.63942e-19
ENSMUSG00000029401.9	Rilpl2	Rab interacting lysosomal protein-like 2	1.51576	9.05087e-19
ENSMUSG00000070436.13	Serpinh1	serine (or cysteine) peptidase inhibitor, clade H, member 1	-1.10138	9.15378e-19
ENSMUSG00000049241.6	Hcar1	hydrocarboxylic acid receptor 1	9.27265	1.00621e-18
ENSMUSG00000059409.10	Ppp2r5d	protein phosphatase 2, regulatory subunit B', delta	1.19136	1.05484e-18
ENSMUSG00000028128.14	F3	coagulation factor III	-1.04672	1.07695e-18
ENSMUSG00000025903.15	Lypla1	lysophospholipase 1	1.26659	1.08202e-18
ENSMUSG00000057335.12	Cep170	centrosomal protein 170	-0.975446	1.08794e-18
ENSMUSG00000041153.10	Osgin2	oxidative stress induced growth inhibitor family member 2	1.6848	1.10612e-18
ENSMUSG00000026492.12	Tfb2m	transcription factor B2, mitochondrial	1.64135	1.11021e-18
ENSMUSG00000025104.14	Hdgfl3	HDGF like 3	-1.31481	1.13122e-18
ENSMUSG00000021756.13	Il6st	interleukin 6 signal transducer	-0.937913	1.15976e-18
ENSMUSG00000044768.17	Macir	macrophage immunometabolism regulator	1.85199	1.19916e-18
ENSMUSG00000022214.16	Dcaf11	DDB1 and CUL4 associated factor 11	1.42429	1.29731e-18
ENSMUSG00000039202.13	Abhd2	abhydrolase domain containing 2	-0.99392	1.31634e-18
ENSMUSG00000027993.17	Trim2	tripartite motif-containing 2	-1.29269	1.32006e-18
ENSMUSG00000040006.14	Ginm1	glycoprotein integral membrane 1	1.23314	1.35205e-18
ENSMUSG00000055301.9	Adh7	alcohol dehydrogenase 7 (class IV), mu or sigma polypeptide	-1.34415	1.40905e-18
ENSMUSG00000031545.7	Gpat4	glycerol-3-phosphate acyltransferase 4	1.10666	1.50561e-18
ENSMUSG00000069516.9	Lyz2	lysozyme 2	-2.8995	1.62534e-18
ENSMUSG00000020307.16	Cdc34	cell division cycle 34	1.44316	1.76157e-18
ENSMUSG00000000184.13	Ccnd2	cyclin D2	0.903421	1.87837e-18
ENSMUSG00000027465.14	Tbc1d20	TBC1 domain family, member 20	1.01543	1.97991e-18
ENSMUSG00000061838.8	Suclg2	succinate-Coenzyme A ligase, GDP-forming, beta subunit	1.05041	2.00847e-18
ENSMUSG00000072596.5	Ear2	eosinophil-associated, ribonuclease A family, member 2	5.2626	2.0473e-18
ENSMUSG00000008136.15	Fhl2	four and a half LIM domains 2	-1.55455	2.3035e-18
ENSMUSG00000075284.11	Wipf1	WAS/WASL interacting protein family, member 1	-1.59058	2.4459e-18
ENSMUSG00000026313.17	Hdac4	histone deacetylase 4	-1.21862	2.47914e-18
ENSMUSG00000031290.15	Lrch2	leucine-rich repeats and calponin homology (CH) domain containing 2	-1.74663	2.49074e-18
ENSMUSG00000050608.12	Micos10	mitochondrial contact site and cristae organizing system subunit 10	1.33742	2.77201e-18
ENSMUSG00000042766.18	Trim46	tripartite motif-containing 46	-2.27053	2.80825e-18
ENSMUSG00000053799.9	Exoc6	exocyst complex component 6	1.79541	2.81656e-18
ENSMUSG00000025931.16	Paqr8	progestin and adipoQ receptor family member VIII	-2.65514	2.89816e-18
ENSMUSG00000031584.17	Gsr	glutathione reductase	1.37791	2.93405e-18
ENSMUSG00000028766.11	Alpl	alkaline phosphatase, liver/bone/kidney	5.54725	3.14413e-18
ENSMUSG00000069255.14	Dusp22	dual specificity phosphatase 22	1.47684	3.51548e-18
ENSMUSG00000030533.17	Unc45a	unc-45 myosin chaperone A	1.27682	3.77735e-18
ENSMUSG00000024953.18	Prdx5	peroxiredoxin 5	1.22669	3.79486e-18
ENSMUSG00000053198.15	Prx	periaxin	-1.9872	3.79853e-18
ENSMUSG00000063450.15	Syne2	spectrin repeat containing, nuclear envelope 2	1.31381	3.80191e-18
ENSMUSG00000061013.7	Mkx	mohawk homeobox	-1.36917	3.91405e-18
ENSMUSG00000027673.13	Ndufb5	NADH:ubiquinone oxidoreductase subunit B5	1.51389	4.01942e-18
ENSMUSG00000032126.17	Hmbs	hydroxymethylbilane synthase	1.52405	4.06792e-18
ENSMUSG00000024044.20	Epb41l3	erythrocyte membrane protein band 4.1 like 3	-0.984287	4.18729e-18
ENSMUSG00000050965.15	Prkca	protein kinase C, alpha	-1.30378	4.22731e-18
ENSMUSG00000029101.17	Rgs12	regulator of G-protein signaling 12	-1.65378	4.42376e-18
ENSMUSG00000024921.18	Smarca2	SWI/SNF related, matrix associated, actin dependent regulator of chromatin, subfamily a, member 2	-0.979099	4.48952e-18
ENSMUSG00000020091.16	Eif4ebp2	eukaryotic translation initiation factor 4E binding protein 2	0.980989	4.58732e-18
ENSMUSG00000024900.6	Cpt1a	carnitine palmitoyltransferase 1a, liver	-1.15342	4.79152e-18
ENSMUSG00000046671.19	Mtfr1l	mitochondrial fission regulator 1-like	1.20543	4.83032e-18
ENSMUSG00000018931.4	Natd1	N-acetyltransferase domain containing 1	1.20962	4.95083e-18
ENSMUSG00000030605.16	Mfge8	milk fat globule EGF and factor V/VIII domain containing	-1.12702	4.95521e-18
ENSMUSG00000007888.16	Crlf1	cytokine receptor-like factor 1	-1.22564	5.01169e-18
ENSMUSG00000000301.17	Pemt	phosphatidylethanolamine N-methyltransferase	3.08804	5.09545e-18
ENSMUSG00000031004.9	Mki67	antigen identified by monoclonal antibody Ki 67	-1.5612	6.07387e-18
ENSMUSG00000046516.11	Cox17	cytochrome c oxidase assembly protein 17, copper chaperone	1.54908	6.23853e-18
ENSMUSG00000066878.6	Gm10184	karyopherin (importin) alpha 2 pseudogene	1.31036	6.42511e-18
ENSMUSG00000047749.3	Zc3hav1l	zinc finger CCCH-type, antiviral 1-like	-1.40149	6.89714e-18
ENSMUSG00000072872.4	Rybp	RING1 and YY1 binding protein	-1.15353	6.90984e-18
ENSMUSG00000062661.7	Ncs1	neuronal calcium sensor 1	-1.36352	7.11325e-18
ENSMUSG00000028541.15	B4galt2	UDP-Gal:betaGlcNAc beta 1,4- galactosyltransferase, polypeptide 2	-1.52065	7.14748e-18
ENSMUSG00000053898.13	Ech1	enoyl coenzyme A hydratase 1, peroxisomal	1.0734	7.3617e-18
ENSMUSG00000048387.9	Osr1	odd-skipped related transcription factor 1	-1.22927	7.56637e-18
ENSMUSG00000030895.10	Hpx	hemopexin	4.50212	7.76683e-18
ENSMUSG00000078812.11	Eif5a	eukaryotic translation initiation factor 5A	0.935021	7.88886e-18
ENSMUSG00000040010.11	Slc7a5	solute carrier family 7 (cationic amino acid transporter, y+ system), member 5	-1.15298	7.90229e-18
ENSMUSG00000040998.19	Npnt	nephronectin	2.40223	7.92015e-18
ENSMUSG00000023191.10	P3h3	prolyl 3-hydroxylase 3	-1.37795	8.44038e-18
ENSMUSG00000030612.7	Mrpl46	mitochondrial ribosomal protein L46	2.01494	8.498e-18
ENSMUSG00000064043.16	Trerf1	transcriptional regulating factor 1	-1.26512	8.55272e-18
ENSMUSG00000020549.15	Elac2	elaC ribonuclease Z 2	1.42722	8.9652e-18
ENSMUSG00000025068.9	Gsto1	glutathione S-transferase omega 1	1.16789	9.10567e-18
ENSMUSG00000045973.19	Slc25a51	solute carrier family 25, member 51	1.04658	9.70732e-18
ENSMUSG00000020843.16	Timm22	translocase of inner mitochondrial membrane 22	1.42351	1.0229e-17
ENSMUSG00000027357.17	Crls1	cardiolipin synthase 1	1.27814	1.04755e-17
ENSMUSG00000045312.13	Lhfpl2	lipoma HMGIC fusion partner-like 2	-0.978845	1.05124e-17
ENSMUSG00000037820.16	Tgm2	transglutaminase 2, C polypeptide	3.46827	1.15016e-17
ENSMUSG00000042700.17	Sipa1l1	signal-induced proliferation-associated 1 like 1	1.07762	1.175e-17
ENSMUSG00000024754.14	Cemip2	cell migration inducing hyaluronidase 2	-1.16143	1.2032e-17
ENSMUSG00000030351.6	Tspan11	tetraspanin 11	-1.58662	1.21282e-17
ENSMUSG00000022361.15	Zhx1	zinc fingers and homeoboxes 1	1.02201	1.26516e-17
ENSMUSG00000069744.8	Psmb3	proteasome (prosome, macropain) subunit, beta type 3	1.33823	1.27011e-17
ENSMUSG00000022210.8	Dhrs4	dehydrogenase/reductase (SDR family) member 4	1.54408	1.28211e-17
ENSMUSG00000026027.14	Stradb	STE20-related kinase adaptor beta	1.65248	1.35805e-17
ENSMUSG00000064289.16	Tank	TRAF family member-associated Nf-kappa B activator	1.33213	1.43995e-17
ENSMUSG00000090290.3	Tarbp1	TAR RNA binding protein 1	1.77488	1.549e-17
ENSMUSG00000021253.8	Tgfb3	transforming growth factor, beta 3	-1.47995	1.65172e-17
ENSMUSG00000024548.12	Setbp1	SET binding protein 1	-1.11798	1.72423e-17
ENSMUSG00000026626.12	Ppp2r5a	protein phosphatase 2, regulatory subunit B', alpha	1.04472	1.78834e-17
ENSMUSG00000035274.14	Tpbg	trophoblast glycoprotein	-1.69642	1.78924e-17
ENSMUSG00000029185.15	Fam114a1	family with sequence similarity 114, member A1	-0.993011	1.79462e-17
ENSMUSG00000039155.16	Cdh26	cadherin-like 26	-2.0862	1.86892e-17
ENSMUSG00000042978.12	Sbk1	SH3-binding kinase 1	1.57023	1.98308e-17
ENSMUSG00000042506.16	Usp22	ubiquitin specific peptidase 22	-0.977759	2.09581e-17
ENSMUSG00000021666.17	Gfm2	G elongation factor, mitochondrial 2	1.44212	2.21317e-17
ENSMUSG00000046722.15	Cdc42se1	CDC42 small effector 1	1.14321	2.39704e-17
ENSMUSG00000057193.9	Slc44a2	solute carrier family 44, member 2	-1.14012	2.42096e-17
ENSMUSG00000028107.15	Tars2	threonyl-tRNA synthetase 2, mitochondrial (putative)	1.52462	2.64957e-17
ENSMUSG00000038233.11	Gask1a	golgi associated kinase 1A	-2.39304	2.67845e-17
ENSMUSG00000043445.8	Pgp	phosphoglycolate phosphatase	1.46809	2.74691e-17
ENSMUSG00000040322.11	Slc25a24	solute carrier family 25 (mitochondrial carrier, phosphate carrier), member 24	-1.18672	2.76362e-17
ENSMUSG00000025867.9	Cplx2	complexin 2	-1.38542	2.78344e-17
ENSMUSG00000051169.15	Rpusd3	RNA pseudouridylate synthase domain containing 3	2.07132	3.04407e-17
ENSMUSG00000008393.10	Carhsp1	calcium regulated heat stable protein 1	1.0942	3.06943e-17
ENSMUSG00000039428.12	Tmem135	transmembrane protein 135	1.20305	3.10082e-17
ENSMUSG00000060073.10	Psma3	proteasome subunit alpha 3	1.06089	3.13417e-17
ENSMUSG00000029710.16	Ephb4	Eph receptor B4	-1.04502	3.1462e-17
ENSMUSG00000027087.12	Itgav	integrin alpha V	-1.3174	3.24251e-17
ENSMUSG00000040260.9	Daam2	dishevelled associated activator of morphogenesis 2	-1.68394	3.26196e-17
ENSMUSG00000006403.14	Adamts4	a disintegrin-like and metallopeptidase (reprolysin type) with thrombospondin type 1 motif, 4	-1.33036	3.29527e-17
ENSMUSG00000045975.9	C2cd2	C2 calcium-dependent domain containing 2	1.52492	3.3722e-17
ENSMUSG00000085793.3	Lin52	lin-52 DREAM MuvB core complex component	1.7799	3.38693e-17
ENSMUSG00000061540.4	Orm2	orosomucoid 2	12.0882	3.74106e-17
ENSMUSG00000025352.7	Gdf11	growth differentiation factor 11	-1.74855	3.98003e-17
ENSMUSG00000033429.11	Mcee	methylmalonyl CoA epimerase	2.02175	4.07415e-17
ENSMUSG00000021710.12	Nln	neurolysin (metallopeptidase M3 family)	1.10719	4.30187e-17
ENSMUSG00000030088.16	Aldh1l1	aldehyde dehydrogenase 1 family, member L1	7.57178	4.34723e-17
ENSMUSG00000044864.17	Ankrd50	ankyrin repeat domain 50	-1.14836	4.35403e-17
ENSMUSG00000025815.14	Dhtkd1	dehydrogenase E1 and transketolase domain containing 1	1.73776	4.37178e-17
ENSMUSG00000033938.6	Ndufb7	NADH:ubiquinone oxidoreductase subunit B7	1.32466	4.50553e-17
ENSMUSG00000071657.13	Bscl2	Berardinelli-Seip congenital lipodystrophy 2 (seipin)	2.06343	4.57195e-17
ENSMUSG00000045896.15	Paip2b	poly(A) binding protein interacting protein 2B	1.17067	4.69474e-17
ENSMUSG00000033739.9	Fkbpl	FK506 binding protein-like	2.07911	4.72419e-17
ENSMUSG00000039735.17	Fnbp1l	formin binding protein 1-like	-1.23238	4.72869e-17
ENSMUSG00000022831.15	Hcls1	hematopoietic cell specific Lyn substrate 1	6.83766	4.83661e-17
ENSMUSG00000051920.8	Rspo2	R-spondin 2	-2.58635	5.05833e-17
ENSMUSG00000038290.16	Smg6	SMG6 nonsense mediated mRNA decay factor	-1.26173	5.22953e-17
ENSMUSG00000054203.8	Ifi205	interferon activated gene 205	3.39843	5.23082e-17
ENSMUSG00000030037.10	Mrpl53	mitochondrial ribosomal protein L53	1.48778	5.4334e-17
ENSMUSG00000020527.15	Myo19	myosin XIX	1.5873	5.58107e-17
ENSMUSG00000039234.12	Sec24d	Sec24 related gene family, member D (S. cerevisiae)	-1.10752	5.83025e-17
ENSMUSG00000025420.14	Katnal2	katanin p60 subunit A-like 2	3.08275	5.96171e-17
ENSMUSG00000050896.13	Rtn4rl2	reticulon 4 receptor-like 2	3.303	6.1572e-17
ENSMUSG00000032601.14	Prkar2a	protein kinase, cAMP dependent regulatory, type II alpha	1.23341	6.64885e-17
ENSMUSG00000026074.16	Map4k4	mitogen-activated protein kinase kinase kinase kinase 4	0.906624	6.72462e-17
ENSMUSG00000032905.6	Atg12	autophagy related 12	1.1192	7.25488e-17
ENSMUSG00000033960.7	Jcad	junctional cadherin 5 associated	-1.06522	7.28323e-17
ENSMUSG00000047454.13	Gphn	gephyrin	1.61062	8.28521e-17
ENSMUSG00000001525.11	Tubb5	tubulin, beta 5 class I	-0.91658	8.28994e-17
ENSMUSG00000036565.8	Ttyh3	tweety family member 3	-0.976564	8.52408e-17
ENSMUSG00000071253.9	Slc25a16	solute carrier family 25 (mitochondrial carrier, Graves disease autoantigen), member 16	1.34002	8.5919e-17
ENSMUSG00000044763.9	Trmt10c	tRNA methyltransferase 10C, mitochondrial RNase P subunit	1.41196	8.78942e-17
ENSMUSG00000020864.14	Ankrd40	ankyrin repeat domain 40	1.17318	9.35042e-17
ENSMUSG00000028517.9	Plpp3	phospholipid phosphatase 3	-1.06911	9.4406e-17
ENSMUSG00000028698.14	Pik3r3	phosphoinositide-3-kinase regulatory subunit 3	1.3256	9.52641e-17
ENSMUSG00000026087.12	Mrpl30	mitochondrial ribosomal protein L30	1.23637	9.8427e-17
ENSMUSG00000028719.9	Cmpk1	cytidine monophosphate (UMP-CMP) kinase 1	1.09274	1.01303e-16
ENSMUSG00000041891.17	Lman1	lectin, mannose-binding, 1	-0.926865	1.02578e-16
ENSMUSG00000041180.14	Hectd2	HECT domain E3 ubiquitin protein ligase 2	-1.49109	1.03748e-16
ENSMUSG00000031626.19	Sorbs2	sorbin and SH3 domain containing 2	-3.27814	1.05557e-16
ENSMUSG00000036523.17	Greb1	gene regulated by estrogen in breast cancer protein	7.54665	1.0633e-16
ENSMUSG00000031605.9	Klhl2	kelch-like 2, Mayven	1.46911	1.13377e-16
ENSMUSG00000031253.16	Srpx2	sushi-repeat-containing protein, X-linked 2	-1.08937	1.18828e-16
ENSMUSG00000015837.16	Sqstm1	sequestosome 1	0.932174	1.19345e-16
ENSMUSG00000071708.12	Sms	spermine synthase	-1.25234	1.20583e-16
ENSMUSG00000026383.15	Epb41l5	erythrocyte membrane protein band 4.1 like 5	2.07639	1.25976e-16
ENSMUSG00000056313.6	Tcim	transcriptional and immune response regulator	3.77651	1.3657e-16
ENSMUSG00000016308.13	Ube2a	ubiquitin-conjugating enzyme E2A	1.40844	1.37619e-16
ENSMUSG00000026536.10	Ifi211	interferon activated gene 211	1.87434	1.37796e-16
ENSMUSG00000022365.7	Derl1	Der1-like domain family, member 1	0.987577	1.39227e-16
ENSMUSG00000039450.12	Dcxr	dicarbonyl L-xylulose reductase	1.67385	1.39895e-16
ENSMUSG00000015016.9	Acsf3	acyl-CoA synthetase family member 3	1.61489	1.4661e-16
ENSMUSG00000030539.14	Sema4b	sema domain, immunoglobulin domain (Ig), transmembrane domain (TM) and short cytoplasmic domain, (semaphorin) 4B	1.37933	1.47568e-16
ENSMUSG00000039501.15	Znfx1	zinc finger, NFX1-type containing 1	1.27661	1.58267e-16
ENSMUSG00000003363.16	Pld3	phospholipase D family, member 3	-1.12676	1.58843e-16
ENSMUSG00000051048.18	P4ha3	procollagen-proline, 2-oxoglutarate 4-dioxygenase (proline 4-hydroxylase), alpha polypeptide III	-2.31644	1.60628e-16
ENSMUSG00000071064.16	Zfp827	zinc finger protein 827	-1.28032	1.6078e-16
ENSMUSG00000045435.10	Tmem60	transmembrane protein 60	1.76315	1.61327e-16
ENSMUSG00000039246.9	Lyplal1	lysophospholipase-like 1	1.65245	1.62259e-16
ENSMUSG00000018882.13	Mrpl45	mitochondrial ribosomal protein L45	1.41366	1.62373e-16
ENSMUSG00000033282.15	Rpgrip1l	Rpgrip1-like	-1.65219	1.63768e-16
ENSMUSG00000002308.17	Cd320	CD320 antigen	1.56707	1.64145e-16
ENSMUSG00000034908.17	Sidt2	SID1 transmembrane family, member 2	1.07241	1.67053e-16
ENSMUSG00000073155.13	1810058I24Rik	RIKEN cDNA 1810058I24 gene	1.17995	1.86638e-16
ENSMUSG00000046807.11	Lrrc75b	leucine rich repeat containing 75B	-1.89886	1.88284e-16
ENSMUSG00000032370.9	Lactb	lactamase, beta	1.62555	1.96348e-16
ENSMUSG00000032231.15	Anxa2	annexin A2	-0.978903	1.98535e-16
ENSMUSG00000032479.16	Map4	microtubule-associated protein 4	-0.917703	2.00579e-16
ENSMUSG00000022193.8	Psmb5	proteasome (prosome, macropain) subunit, beta type 5	1.52053	2.20903e-16
ENSMUSG00000002767.14	Mrpl2	mitochondrial ribosomal protein L2	1.40968	2.34296e-16
ENSMUSG00000025289.16	Prdx4	peroxiredoxin 4	-1.21264	2.37347e-16
ENSMUSG00000019256.18	Ahr	aryl-hydrocarbon receptor	-2.10916	2.49725e-16
ENSMUSG00000044018.4	Mrpl50	mitochondrial ribosomal protein L50	1.37463	2.55954e-16
ENSMUSG00000020241.14	Col6a2	collagen, type VI, alpha 2	0.954625	2.74512e-16
ENSMUSG00000038387.10	Rras	related RAS viral (r-ras) oncogene	1.30604	3.00161e-16
ENSMUSG00000048911.16	Rnf24	ring finger protein 24	1.13077	3.02636e-16
ENSMUSG00000041650.16	Pcca	propionyl-Coenzyme A carboxylase, alpha polypeptide	1.335	3.15743e-16
ENSMUSG00000066735.9	Vkorc1l1	vitamin K epoxide reductase complex, subunit 1-like 1	1.0994	3.17921e-16
ENSMUSG00000020349.5	Ppp2ca	protein phosphatase 2 (formerly 2A), catalytic subunit, alpha isoform	0.958653	3.23643e-16
ENSMUSG00000029484.13	Anxa3	annexin A3	-1.72097	3.24385e-16
ENSMUSG00000042350.14	Arel1	apoptosis resistant E3 ubiquitin protein ligase 1	1.23796	3.27929e-16
ENSMUSG00000049090.4	Zadh2	zinc binding alcohol dehydrogenase, domain containing 2	1.2036	3.31912e-16
ENSMUSG00000063884.7	Ptcd3	pentatricopeptide repeat domain 3	1.10226	3.39496e-16
ENSMUSG00000002006.13	Pdzd4	PDZ domain containing 4	-1.46301	3.45532e-16
ENSMUSG00000032849.15	Abcc4	ATP-binding cassette, sub-family C (CFTR/MRP), member 4	1.29543	3.48561e-16
ENSMUSG00000038244.15	Mical2	microtubule associated monooxygenase, calponin and LIM domain containing 2	1.28993	3.51739e-16
ENSMUSG00000031557.17	Plekha2	pleckstrin homology domain-containing, family A (phosphoinositide binding specific) member 2	-1.41631	3.73461e-16
ENSMUSG00000024593.16	Megf10	multiple EGF-like-domains 10	-2.0381	3.93632e-16
ENSMUSG00000020689.5	Itgb3	integrin beta 3	-1.26824	4.16995e-16
ENSMUSG00000080316.12	Spaca6	sperm acrosome associated 6	-1.28844	4.17788e-16
ENSMUSG00000026617.17	Bpnt1	3'(2'), 5'-bisphosphate nucleotidase 1	1.35827	4.28492e-16
ENSMUSG00000068270.16	Shroom4	shroom family member 4	-1.40433	4.31891e-16
ENSMUSG00000010830.9	Kdelr3	KDEL (Lys-Asp-Glu-Leu) endoplasmic reticulum protein retention receptor 3	-1.31353	4.34061e-16
ENSMUSG00000022440.10	C1qtnf6	C1q and tumor necrosis factor related protein 6	-1.08983	4.37771e-16
ENSMUSG00000031974.9	Abcb10	ATP-binding cassette, sub-family B (MDR/TAP), member 10	1.3188	4.47319e-16
ENSMUSG00000023025.17	Larp4	La ribonucleoprotein 4	0.933379	4.77615e-16
ENSMUSG00000002250.17	Ppard	peroxisome proliferator activator receptor delta	1.13259	4.78234e-16
ENSMUSG00000031357.4	Syap1	synapse associated protein 1	1.0117	4.90887e-16
ENSMUSG00000030281.17	Il17rc	interleukin 17 receptor C	1.18442	5.2e-16
ENSMUSG00000019302.17	Atp6v0a1	ATPase, H+ transporting, lysosomal V0 subunit A1	1.08718	5.31263e-16
ENSMUSG00000089774.3	Slc5a3	solute carrier family 5 (inositol transporters), member 3	-0.849335	5.36215e-16
ENSMUSG00000021520.5	Uqcrb	ubiquinol-cytochrome c reductase binding protein	1.34519	5.45472e-16
ENSMUSG00000039497.9	Dse	dermatan sulfate epimerase	-0.967701	5.57569e-16
ENSMUSG00000034863.10	Ano8	anoctamin 8	1.13908	5.73701e-16
ENSMUSG00000044149.8	Nkrf	NF-kappaB repressing factor	1.69465	5.93829e-16
ENSMUSG00000038633.6	Degs1	delta(4)-desaturase, sphingolipid 1	1.03848	5.94064e-16
ENSMUSG00000006998.17	Psmd2	proteasome (prosome, macropain) 26S subunit, non-ATPase, 2	0.948881	6.16767e-16
ENSMUSG00000034118.16	Tpst1	protein-tyrosine sulfotransferase 1	-1.21295	6.65904e-16
ENSMUSG00000026112.8	Coa5	cytochrome C oxidase assembly factor 5	0.998463	6.88701e-16
ENSMUSG00000030161.9	Gabarapl1	gamma-aminobutyric acid (GABA) A receptor-associated protein-like 1	1.04374	7.04556e-16
ENSMUSG00000029833.18	Trim24	tripartite motif-containing 24	0.984469	7.20807e-16
ENSMUSG00000052911.10	Lamb2	laminin, beta 2	-1.0187	7.25918e-16
ENSMUSG00000022799.5	Arhgap31	Rho GTPase activating protein 31	-1.07847	7.47833e-16
ENSMUSG00000032246.15	Calml4	calmodulin-like 4	-2.25023	7.62253e-16
ENSMUSG00000024011.18	Pi16	peptidase inhibitor 16	-2.17886	7.84438e-16
ENSMUSG00000075705.14	Msrb1	methionine sulfoxide reductase B1	1.28856	8.64098e-16
ENSMUSG00000030222.14	Rerg	RAS-like, estrogen-regulated, growth-inhibitor	-4.00791	8.72441e-16
ENSMUSG00000004937.7	Sgta	small glutamine-rich tetratricopeptide repeat (TPR)-containing, alpha	1.1203	8.90639e-16
ENSMUSG00000038357.11	Camp	cathelicidin antimicrobial peptide	6.13386	8.98568e-16
ENSMUSG00000026854.17	Usp20	ubiquitin specific peptidase 20	1.29321	9.11539e-16
ENSMUSG00000043943.15	Naalad2	N-acetylated alpha-linked acidic dipeptidase 2	-1.26354	9.39945e-16
ENSMUSG00000027562.13	Car2	carbonic anhydrase 2	6.63314	9.78254e-16
ENSMUSG00000032812.19	Arap1	ArfGAP with RhoGAP domain, ankyrin repeat and PH domain 1	-1.14624	9.96289e-16
ENSMUSG00000027833.17	Shox2	short stature homeobox 2	-1.47082	1.00828e-15
ENSMUSG00000028447.12	Dctn3	dynactin 3	1.27151	1.03698e-15
ENSMUSG00000041308.7	Sntb2	syntrophin, basic 2	-0.863174	1.04899e-15
ENSMUSG00000032243.9	Itga11	integrin alpha 11	-3.15185	1.06147e-15
ENSMUSG00000042010.17	Acacb	acetyl-Coenzyme A carboxylase beta	1.46336	1.0931e-15
ENSMUSG00000061286.8	Exosc5	exosome component 5	1.72331	1.10254e-15
ENSMUSG00000031641.15	Cbr4	carbonyl reductase 4	1.41916	1.10264e-15
ENSMUSG00000031904.6	Slc7a6	solute carrier family 7 (cationic amino acid transporter, y+ system), member 6	1.0564	1.1134e-15
ENSMUSG00000034487.5	Poglut3	protein O-glucosyltransferase 3	-1.05615	1.15232e-15
ENSMUSG00000030796.18	Tead2	TEA domain family member 2	-1.20953	1.20564e-15
ENSMUSG00000036564.18	Ndrg4	N-myc downstream regulated gene 4	-1.69527	1.21331e-15
ENSMUSG00000028926.16	Cdk14	cyclin-dependent kinase 14	-0.925079	1.21863e-15
ENSMUSG00000039016.6	Timm8b	translocase of inner mitochondrial membrane 8B	1.45445	1.24285e-15
ENSMUSG00000033849.4	B3galt2	UDP-Gal:betaGlcNAc beta 1,3-galactosyltransferase, polypeptide 2	6.6106	1.24965e-15
ENSMUSG00000030264.15	Thumpd3	THUMP domain containing 3	1.36468	1.26192e-15
ENSMUSG00000032013.7	Trim29	tripartite motif-containing 29	7.25445	1.34882e-15
ENSMUSG00000027797.16	Dclk1	doublecortin-like kinase 1	-1.25108	1.38751e-15
ENSMUSG00000025178.10	Pi4k2a	phosphatidylinositol 4-kinase type 2 alpha	1.03532	1.38981e-15
ENSMUSG00000004071.14	Cdip1	cell death inducing Trp53 target 1	1.10708	1.40076e-15
ENSMUSG00000030083.12	Abtb1	ankyrin repeat and BTB (POZ) domain containing 1	1.40894	1.45077e-15
ENSMUSG00000029163.10	Emilin1	elastin microfibril interfacer 1	-1.02641	1.54564e-15
ENSMUSG00000043531.17	Sorcs1	sortilin-related VPS10 domain containing receptor 1	-2.29582	1.56284e-15
ENSMUSG00000072623.7	Zfp9	zinc finger protein 9	-1.14116	1.56818e-15
ENSMUSG00000024063.14	Lbh	limb-bud and heart	-0.959763	1.67136e-15
ENSMUSG00000024937.16	Ehbp1l1	EH domain binding protein 1-like 1	0.997277	1.6798e-15
ENSMUSG00000031398.14	Plxna3	plexin A3	-1.22514	1.68976e-15
ENSMUSG00000058325.7	Dock1	dedicator of cytokinesis 1	-0.966408	1.74825e-15
ENSMUSG00000034220.8	Gpc1	glypican 1	-1.14878	1.77137e-15
ENSMUSG00000032459.10	Mrps22	mitochondrial ribosomal protein S22	1.54961	1.81532e-15
ENSMUSG00000012428.10	Steap4	STEAP family member 4	5.77929	1.8577e-15
ENSMUSG00000050705.16	2310061I04Rik	RIKEN cDNA 2310061I04 gene	2.21533	1.94247e-15
ENSMUSG00000052962.4	Mrpl35	mitochondrial ribosomal protein L35	1.40186	1.98014e-15
ENSMUSG00000038683.17	Pak1ip1	PAK1 interacting protein 1	1.22906	2.00719e-15
ENSMUSG00000026489.14	Coq8a	coenzyme Q8A	3.84325	2.01636e-15
ENSMUSG00000023206.17	Il15ra	interleukin 15 receptor, alpha chain	2.38138	2.13472e-15
ENSMUSG00000036298.11	Slc2a13	solute carrier family 2 (facilitated glucose transporter), member 13	-1.89345	2.13511e-15
ENSMUSG00000023942.16	Slc29a1	solute carrier family 29 (nucleoside transporters), member 1	-0.901441	2.16388e-15
ENSMUSG00000005609.17	Ctr9	CTR9 homolog, Paf1/RNA polymerase II complex component	1.02045	2.17881e-15
ENSMUSG00000028672.14	Hmgcl	3-hydroxy-3-methylglutaryl-Coenzyme A lyase	1.34467	2.22107e-15
ENSMUSG00000041390.19	Mdfic	MyoD family inhibitor domain containing	-1.11185	2.23511e-15
ENSMUSG00000017386.11	Traf4	TNF receptor associated factor 4	0.961753	2.27142e-15
ENSMUSG00000105096.2	Gbp10	guanylate-binding protein 10	6.59947	2.37385e-15
ENSMUSG00000041923.16	Nol4	nucleolar protein 4	-2.02817	2.48851e-15
ENSMUSG00000041633.15	Kctd12b	potassium channel tetramerisation domain containing 12b	1.66567	2.49517e-15
ENSMUSG00000050737.14	Ptges	prostaglandin E synthase	0.991211	2.73528e-15
ENSMUSG00000027305.10	Ndufaf1	NADH:ubiquinone oxidoreductase complex assembly factor 1	1.59261	2.78509e-15
ENSMUSG00000020439.18	Smtn	smoothelin	-1.23273	2.79051e-15
ENSMUSG00000037740.9	Mrps26	mitochondrial ribosomal protein S26	1.19186	2.90941e-15
ENSMUSG00000060572.18	Mfap2	microfibrillar-associated protein 2	-3.73284	3.07147e-15
ENSMUSG00000026628.14	Atf3	activating transcription factor 3	3.01367	3.18828e-15
ENSMUSG00000008348.10	Ubc	ubiquitin C	0.90552	3.44096e-15
ENSMUSG00000026223.16	Itm2c	integral membrane protein 2C	-0.969419	3.65729e-15
ENSMUSG00000051586.18	Mical3	microtubule associated monooxygenase, calponin and LIM domain containing 3	1.03457	3.68092e-15
ENSMUSG00000042613.10	Pbxip1	pre B cell leukemia transcription factor interacting protein 1	-1.08458	3.68743e-15
ENSMUSG00000032018.15	Sc5d	sterol-C5-desaturase	1.22464	3.77145e-15
ENSMUSG00000040848.12	Sft2d2	SFT2 domain containing 2	1.36273	3.91753e-15
ENSMUSG00000003032.9	Klf4	Kruppel-like factor 4 (gut)	-1.60672	3.95688e-15
ENSMUSG00000059316.3	Slc27a4	solute carrier family 27 (fatty acid transporter), member 4	1.24947	3.97088e-15
ENSMUSG00000041313.15	Slc7a1	solute carrier family 7 (cationic amino acid transporter, y+ system), member 1	-1.06397	4.05629e-15
ENSMUSG00000027223.16	Mapk8ip1	mitogen-activated protein kinase 8 interacting protein 1	-1.3326	4.09465e-15
ENSMUSG00000040640.12	Erc2	ELKS/RAB6-interacting/CAST family member 2	-2.06102	4.16976e-15
ENSMUSG00000078515.5	Ddi2	DNA-damage inducible protein 2	0.962628	4.18114e-15
ENSMUSG00000018841.18	Rad51d	RAD51 paralog D	1.31418	4.3267e-15
ENSMUSG00000048027.10	Rgmb	repulsive guidance molecule family member B	-1.06278	4.41271e-15
ENSMUSG00000049553.12	Polr1a	polymerase (RNA) I polypeptide A	1.00981	4.43129e-15
ENSMUSG00000021096.12	Ppm1a	protein phosphatase 1A, magnesium dependent, alpha isoform	0.939524	4.4984e-15
ENSMUSG00000043441.6	Gpr149	G protein-coupled receptor 149	-2.04012	4.74152e-15
ENSMUSG00000027698.15	Nceh1	neutral cholesterol ester hydrolase 1	-2.0753	4.88739e-15
ENSMUSG00000036299.6	BC031181	cDNA sequence BC031181	1.19668	5.06721e-15
ENSMUSG00000008398.17	Elk3	ELK3, member of ETS oncogene family	-1.42989	5.10279e-15
ENSMUSG00000064373.14	Selenop	selenoprotein P	0.856079	5.34389e-15
ENSMUSG00000018428.16	Akap1	A kinase (PRKA) anchor protein 1	1.11699	5.37659e-15
ENSMUSG00000024395.10	Lims2	LIM and senescent cell antigen like domains 2	3.34946	5.38898e-15
ENSMUSG00000032412.9	Atp1b3	ATPase, Na+/K+ transporting, beta 3 polypeptide	1.24679	5.75218e-15
ENSMUSG00000046062.6	Ppp1r15b	protein phosphatase 1, regulatory subunit 15B	0.920538	6.07093e-15
ENSMUSG00000029063.17	Nadk	NAD kinase	1.07364	6.1799e-15
ENSMUSG00000037005.17	Xpnpep2	X-prolyl aminopeptidase (aminopeptidase P) 2, membrane-bound	-1.56046	6.55142e-15
ENSMUSG00000022261.7	Sdc2	syndecan 2	-1.15323	6.71613e-15
ENSMUSG00000044345.10	Marveld1	MARVEL (membrane-associating) domain containing 1	0.951713	6.78308e-15
ENSMUSG00000032826.20	Ank2	ankyrin 2, brain	-1.18032	6.8221e-15
ENSMUSG00000050989.11	Selenon	selenoprotein N	-1.06583	6.96913e-15
ENSMUSG00000000384.16	Tbrg4	transforming growth factor beta regulated gene 4	1.17548	7.38472e-15
ENSMUSG00000022306.10	Zfpm2	zinc finger protein, multitype 2	-1.31601	7.5719e-15
ENSMUSG00000041482.18	Piezo2	piezo-type mechanosensitive ion channel component 2	-4.41682	7.6393e-15
ENSMUSG00000019779.16	Frk	fyn-related kinase	-1.46494	7.90552e-15
ENSMUSG00000029334.15	Prkg2	protein kinase, cGMP-dependent, type II	-1.58106	8.37032e-15
ENSMUSG00000020922.12	Lsm12	LSM12 homolog	1.00589	8.63614e-15
ENSMUSG00000021804.7	Rgr	retinal G protein coupled receptor	11.3761	8.63862e-15
ENSMUSG00000021185.17	Dglucy	D-glutamate cyclase	1.25235	8.6829e-15
ENSMUSG00000051427.15	Ccdc157	coiled-coil domain containing 157	-1.37939	8.90881e-15
ENSMUSG00000047963.8	Stbd1	starch binding domain 1	3.5955	8.92914e-15
ENSMUSG00000030319.9	Cand2	cullin-associated and neddylation-dissociated 2 (putative)	-1.30844	9.04014e-15
ENSMUSG00000052534.16	Pbx1	pre B cell leukemia homeobox 1	-1.03299	9.49569e-15
ENSMUSG00000026456.19	Cyb5r1	cytochrome b5 reductase 1	-1.04202	1.03146e-14
ENSMUSG00000057666.19	Gapdh	glyceraldehyde-3-phosphate dehydrogenase	0.954252	1.03302e-14
ENSMUSG00000079588.4	Tmem182	transmembrane protein 182	11.1268	1.0654e-14
ENSMUSG00000041417.16	Pik3r1	phosphoinositide-3-kinase regulatory subunit 1	0.982145	1.08133e-14
ENSMUSG00000043336.15	Filip1l	filamin A interacting protein 1-like	-1.60744	1.08588e-14
ENSMUSG00000059734.8	Ndufs8	NADH:ubiquinone oxidoreductase core subunit S8	1.23902	1.11579e-14
ENSMUSG00000037826.6	Ppm1k	protein phosphatase 1K (PP2C domain containing)	1.35142	1.16228e-14
ENSMUSG00000020571.14	Pdia6	protein disulfide isomerase associated 6	0.883011	1.18978e-14
ENSMUSG00000034880.8	Mrpl34	mitochondrial ribosomal protein L34	1.39987	1.21639e-14
ENSMUSG00000022564.8	Grina	glutamate receptor, ionotropic, N-methyl D-aspartate-associated protein 1 (glutamate binding)	0.906948	1.2387e-14
ENSMUSG00000005534.11	Insr	insulin receptor	1.1048	1.24361e-14
ENSMUSG00000030879.11	Mrpl17	mitochondrial ribosomal protein L17	1.19924	1.30097e-14
ENSMUSG00000053477.19	Tcf4	transcription factor 4	-1.02295	1.31891e-14
ENSMUSG00000057315.15	Arhgap24	Rho GTPase activating protein 24	1.57051	1.33688e-14
ENSMUSG00000045160.15	Bola3	bolA-like 3 (E. coli)	1.5075	1.39459e-14
ENSMUSG00000038648.6	Creb3l2	cAMP responsive element binding protein 3-like 2	-0.931361	1.47546e-14
ENSMUSG00000038011.16	Dnah10	dynein, axonemal, heavy chain 10	3.7383	1.47653e-14
ENSMUSG00000031380.11	Vegfd	vascular endothelial growth factor D	-1.1103	1.49376e-14
ENSMUSG00000021906.15	Oxnad1	oxidoreductase NAD-binding domain containing 1	1.56111	1.57915e-14
ENSMUSG00000028339.18	Col15a1	collagen, type XV, alpha 1	1.035	1.58165e-14
ENSMUSG00000074934.4	Grem1	gremlin 1, DAN family BMP antagonist	-1.82639	1.65571e-14
ENSMUSG00000052688.13	Rab7b	RAB7B, member RAS oncogene family	-1.8256	1.65579e-14
ENSMUSG00000002845.15	Tmem39a	transmembrane protein 39a	-1.09218	1.67261e-14
ENSMUSG00000041220.11	Elovl6	ELOVL family member 6, elongation of long chain fatty acids (yeast)	-1.37391	1.76344e-14
ENSMUSG00000021750.17	Fam107a	family with sequence similarity 107, member A	11.2525	1.79589e-14
ENSMUSG00000022450.7	Ndufa6	NADH:ubiquinone oxidoreductase subunit A6	1.2068	1.87112e-14
ENSMUSG00000071713.7	Csf2rb	colony stimulating factor 2 receptor, beta, low-affinity (granulocyte-macrophage)	4.2461	1.97211e-14
ENSMUSG00000102222.2	Pcdhga10	protocadherin gamma subfamily A, 10	-1.02303	1.98627e-14
ENSMUSG00000110949.2	Nudt8	nudix (nucleoside diphosphate linked moiety X)-type motif 8	1.8729	2.01589e-14
ENSMUSG00000020423.7	Btg2	BTG anti-proliferation factor 2	1.36464	2.05817e-14
ENSMUSG00000056076.14	Eif3b	eukaryotic translation initiation factor 3, subunit B	0.888117	2.08071e-14
ENSMUSG00000075232.7	Amd1	S-adenosylmethionine decarboxylase 1	1.04658	2.09187e-14
ENSMUSG00000033793.13	Atp6v1h	ATPase, H+ transporting, lysosomal V1 subunit H	0.977636	2.12482e-14
ENSMUSG00000062232.15	Rapgef2	Rap guanine nucleotide exchange factor (GEF) 2	-1.06997	2.15386e-14
ENSMUSG00000045658.17	Pid1	phosphotyrosine interaction domain containing 1	-1.31203	2.15567e-14
ENSMUSG00000021156.18	Zmynd11	zinc finger, MYND domain containing 11	-0.97052	2.20568e-14
ENSMUSG00000000693.11	Loxl3	lysyl oxidase-like 3	-1.26198	2.22352e-14
ENSMUSG00000071001.5	Hrct1	histidine rich carboxyl terminus 1	3.51602	2.23261e-14
ENSMUSG00000079557.12	Marchf2	membrane associated ring-CH-type finger 2	1.1766	2.25011e-14
ENSMUSG00000025981.14	Coq10b	coenzyme Q10B	1.60027	2.29055e-14
ENSMUSG00000051242.2	Pcdhb9	protocadherin beta 9	-1.85815	2.30675e-14
ENSMUSG00000051232.14	Tmem199	transmembrane protein 199	1.69285	2.30799e-14
ENSMUSG00000026605.15	Cenpf	centromere protein F	-2.11714	2.32659e-14
ENSMUSG00000041889.8	Shisa4	shisa family member 4	-1.64386	2.43074e-14
ENSMUSG00000016252.8	Atp5e	ATP synthase, H+ transporting, mitochondrial F1 complex, epsilon subunit	0.968341	2.46276e-14
ENSMUSG00000055737.13	Ghr	growth hormone receptor	0.835249	2.5005e-14
ENSMUSG00000001131.12	Timp1	tissue inhibitor of metalloproteinase 1	-1.45299	2.56171e-14
ENSMUSG00000005947.12	Itgae	integrin alpha E, epithelial-associated	4.83198	2.6596e-14
ENSMUSG00000044734.17	Serpinb1a	serine (or cysteine) peptidase inhibitor, clade B, member 1a	-1.69403	2.86096e-14
ENSMUSG00000021069.18	Pygl	liver glycogen phosphorylase	11.1611	3.06729e-14
ENSMUSG00000015478.14	Rnf5	ring finger protein 5	1.33875	3.16399e-14
ENSMUSG00000062070.13	Pgk1	phosphoglycerate kinase 1	0.855642	3.16498e-14
ENSMUSG00000074622.5	Mafb	v-maf musculoaponeurotic fibrosarcoma oncogene family, protein B (avian)	-3.3736	3.19859e-14
ENSMUSG00000048807.3	Slc35e4	solute carrier family 35, member E4	1.4919	3.22698e-14
ENSMUSG00000023022.15	Lima1	LIM domain and actin binding 1	-0.880659	3.39317e-14
ENSMUSG00000068196.6	Col8a1	collagen, type VIII, alpha 1	-2.23278	3.40816e-14
ENSMUSG00000001288.16	Rarg	retinoic acid receptor, gamma	-1.04841	3.44774e-14
ENSMUSG00000010476.15	Ebf3	early B cell factor 3	-1.17579	3.46084e-14
ENSMUSG00000029769.17	Ccdc136	coiled-coil domain containing 136	-1.79012	3.73217e-14
ENSMUSG00000029456.13	Acad10	acyl-Coenzyme A dehydrogenase family, member 10	1.35959	3.81886e-14
ENSMUSG00000030353.16	Tead4	TEA domain family member 4	2.03233	3.81984e-14
ENSMUSG00000039270.10	Megf9	multiple EGF-like-domains 9	1.0651	3.95645e-14
ENSMUSG00000023908.9	Pkmyt1	protein kinase, membrane associated tyrosine/threonine 1	2.18889	3.95769e-14
ENSMUSG00000049288.5	Lix1l	Lix1-like	-0.958265	4.01635e-14
ENSMUSG00000044792.8	Isca1	iron-sulfur cluster assembly 1	0.969653	4.03978e-14
ENSMUSG00000029861.18	Fam131b	family with sequence similarity 131, member B	-1.79633	4.08533e-14
ENSMUSG00000029119.10	Man2b2	mannosidase 2, alpha B2	-1.003	4.15651e-14
ENSMUSG00000013367.6	Iglon5	IgLON family member 5	-1.97132	4.21713e-14
ENSMUSG00000022752.10	Tomm70a	translocase of outer mitochondrial membrane 70A	0.878244	4.33284e-14
ENSMUSG00000039629.15	Strip2	striatin interacting protein 2	1.36489	4.3734e-14
ENSMUSG00000030806.7	Stx1b	syntaxin 1B	3.30789	4.39666e-14
ENSMUSG00000074604.10	Mgst2	microsomal glutathione S-transferase 2	3.67305	4.42544e-14
ENSMUSG00000056999.17	Ide	insulin degrading enzyme	0.936824	4.51543e-14
ENSMUSG00000019916.15	P4ha1	procollagen-proline, 2-oxoglutarate 4-dioxygenase (proline 4-hydroxylase), alpha 1 polypeptide	-0.932065	4.56161e-14
ENSMUSG00000031295.14	Phka2	phosphorylase kinase alpha 2	1.08846	4.62471e-14
ENSMUSG00000052155.6	Acvr2a	activin receptor IIA	-0.885819	4.64095e-14
ENSMUSG00000024120.13	Lrpprc	leucine-rich PPR-motif containing	0.985636	5.11764e-14
ENSMUSG00000040836.16	Gpr161	G protein-coupled receptor 161	-1.47729	5.17066e-14
ENSMUSG00000001416.14	Cct3	chaperonin containing Tcp1, subunit 3 (gamma)	0.932716	5.2086e-14
ENSMUSG00000027859.11	Ngf	nerve growth factor	-3.0746	5.26044e-14
ENSMUSG00000030352.16	Tspan9	tetraspanin 9	-1.04421	5.30584e-14
ENSMUSG00000039768.17	Dnajc11	DnaJ heat shock protein family (Hsp40) member C11	1.1204	5.4062e-14
ENSMUSG00000044551.14	9930012K11Rik	RIKEN cDNA 9930012K11 gene	-1.88345	5.51569e-14
ENSMUSG00000002846.10	Timmdc1	translocase of inner mitochondrial membrane domain containing 1	1.2255	5.64959e-14
ENSMUSG00000063605.6	Ccdc102a	coiled-coil domain containing 102A	-1.11496	5.80339e-14
ENSMUSG00000051166.11	Eml5	echinoderm microtubule associated protein like 5	1.47781	6.09736e-14
ENSMUSG00000028614.15	Ndc1	NDC1 transmembrane nucleoporin	1.31531	6.20772e-14
ENSMUSG00000041936.19	Agrn	agrin	-0.918633	6.27649e-14
ENSMUSG00000038296.15	Galnt18	polypeptide N-acetylgalactosaminyltransferase 18	-1.28368	6.49455e-14
ENSMUSG00000074264.13	Amy1	amylase 1, salivary	3.61452	6.52033e-14
ENSMUSG00000037300.20	Ttc13	tetratricopeptide repeat domain 13	1.10252	6.66967e-14
ENSMUSG00000021731.11	Mrps30	mitochondrial ribosomal protein S30	1.18221	6.68657e-14
ENSMUSG00000035873.9	Pawr	PRKC, apoptosis, WT1, regulator	-1.7229	6.87819e-14
ENSMUSG00000024066.10	Xdh	xanthine dehydrogenase	0.912503	6.92289e-14
ENSMUSG00000028978.13	Nos3	nitric oxide synthase 3, endothelial cell	6.92392	6.99944e-14
ENSMUSG00000025993.11	Slc40a1	solute carrier family 40 (iron-regulated transporter), member 1	-1.72609	7.25807e-14
ENSMUSG00000025959.14	Klf7	Kruppel-like factor 7 (ubiquitous)	-1.14194	7.44411e-14
ENSMUSG00000039477.17	Tnrc18	trinucleotide repeat containing 18	-0.970917	7.54306e-14
ENSMUSG00000021175.16	Cdca7l	cell division cycle associated 7 like	1.76572	7.58333e-14
ENSMUSG00000020262.16	Adarb1	adenosine deaminase, RNA-specific, B1	1.21369	7.6393e-14
ENSMUSG00000029826.15	Zc3hav1	zinc finger CCCH type, antiviral 1	-0.924568	7.80497e-14
ENSMUSG00000020774.10	Aspa	aspartoacylase	3.62476	8.14462e-14
ENSMUSG00000029012.12	Orc5	origin recognition complex, subunit 5	1.28045	8.24715e-14
ENSMUSG00000030788.17	Rnf141	ring finger protein 141	1.36131	8.44665e-14
ENSMUSG00000097328.8	Tnfsf12	tumor necrosis factor (ligand) superfamily, member 12	-1.63528	8.55707e-14
ENSMUSG00000027883.16	Gpsm2	G-protein signalling modulator 2 (AGS3-like, C. elegans)	-1.32996	8.6284e-14
ENSMUSG00000030218.3	Mgp	matrix Gla protein	-1.74191	8.71851e-14
ENSMUSG00000038582.16	Pptc7	PTC7 protein phosphatase homolog	1.18134	8.78708e-14
ENSMUSG00000024181.10	Mrpl28	mitochondrial ribosomal protein L28	1.18927	9.04159e-14
ENSMUSG00000033209.18	Ttc28	tetratricopeptide repeat domain 28	-1.28006	9.10438e-14
ENSMUSG00000015575.16	Atp6v0e	ATPase, H+ transporting, lysosomal V0 subunit E	0.96475	9.2988e-14
ENSMUSG00000047910.7	Pcdhb16	protocadherin beta 16	-0.944817	9.48286e-14
ENSMUSG00000042312.11	S100a13	S100 calcium binding protein A13	1.49746	9.52522e-14
ENSMUSG00000065990.13	Aurkaip1	aurora kinase A interacting protein 1	1.20022	9.57502e-14
ENSMUSG00000024588.11	Fech	ferrochelatase	0.899557	9.75828e-14
ENSMUSG00000032717.15	Mdfi	MyoD family inhibitor	-2.15679	9.79743e-14
ENSMUSG00000006457.5	Actn3	actinin alpha 3	-2.30137	1.05202e-13
ENSMUSG00000034685.5	Fam171a2	family with sequence similarity 171, member A2	-1.52604	1.05424e-13
ENSMUSG00000028953.11	Abcf2	ATP-binding cassette, sub-family F (GCN20), member 2	0.976673	1.07076e-13
ENSMUSG00000117310.3	Ptp4a1	protein tyrosine phosphatase 4a1	0.854001	1.08289e-13
ENSMUSG00000040888.11	Gfer	growth factor, augmenter of liver regeneration	1.40632	1.09073e-13
ENSMUSG00000098470.2	C1rb	complement component 1, r subcomponent B	-0.950842	1.13992e-13
ENSMUSG00000002365.11	Snx9	sorting nexin 9	-0.873442	1.20847e-13
ENSMUSG00000059890.17	Ube4a	ubiquitination factor E4A	0.951404	1.27452e-13
ENSMUSG00000020546.15	Stxbp4	syntaxin binding protein 4	-1.20498	1.29473e-13
ENSMUSG00000037152.12	Ndufc1	NADH:ubiquinone oxidoreductase subunit C1	1.65477	1.3233e-13
ENSMUSG00000013921.16	Clip3	CAP-GLY domain containing linker protein 3	-1.1079	1.35813e-13
ENSMUSG00000048332.14	Lhfp	lipoma HMGIC fusion partner	-0.934346	1.36376e-13
ENSMUSG00000021786.14	Oxsm	3-oxoacyl-ACP synthase, mitochondrial	1.42231	1.39965e-13
ENSMUSG00000003731.14	Kpna6	karyopherin (importin) alpha 6	0.975237	1.43493e-13
ENSMUSG00000021290.7	Atp5mpl	ATP synthase membrane subunit 6.8PL	1.56205	1.43991e-13
ENSMUSG00000015536.15	Mocs2	molybdenum cofactor synthesis 2	1.10811	1.44982e-13
ENSMUSG00000067629.14	Syngap1	synaptic Ras GTPase activating protein 1 homolog (rat)	-1.06529	1.45176e-13
ENSMUSG00000058704.10	Memo1	mediator of cell motility 1	1.18867	1.47786e-13
ENSMUSG00000031070.16	Mrgprf	MAS-related GPR, member F	-1.14437	1.48143e-13
ENSMUSG00000029860.17	Zyx	zyxin	-0.872787	1.53617e-13
ENSMUSG00000041779.6	Tram2	translocating chain-associating membrane protein 2	-1.08841	1.5493e-13
ENSMUSG00000020893.18	Per1	period circadian clock 1	1.17913	1.5632e-13
ENSMUSG00000004952.14	Rasa4	RAS p21 protein activator 4	-1.22622	1.64534e-13
ENSMUSG00000079043.4	Fastkd5	FAST kinase domains 5	1.54494	1.65082e-13
ENSMUSG00000000567.6	Sox9	SRY (sex determining region Y)-box 9	-1.00882	1.78261e-13
ENSMUSG00000024410.16	Rmc1	regulator of MON1-CCZ1	1.21665	1.80605e-13
ENSMUSG00000021116.11	Eif2s1	eukaryotic translation initiation factor 2, subunit 1 alpha	0.972178	1.85907e-13
ENSMUSG00000021484.9	Lman2	lectin, mannose-binding 2	0.842453	1.86642e-13
ENSMUSG00000022184.9	Fbxo4	F-box protein 4	1.17063	1.87383e-13
ENSMUSG00000037720.17	Tmem33	transmembrane protein 33	0.972098	1.94043e-13
ENSMUSG00000032839.14	Trpc1	transient receptor potential cation channel, subfamily C, member 1	1.74257	2.02227e-13
ENSMUSG00000030652.12	Coq7	demethyl-Q 7	2.0854	2.07169e-13
ENSMUSG00000046312.5	Myorg	myogenesis regulating glycosidase (putative)	0.963726	2.19099e-13
ENSMUSG00000024772.10	Ehd1	EH-domain containing 1	0.863615	2.28216e-13
ENSMUSG00000073889.11	Il11ra1	interleukin 11 receptor, alpha chain 1	-0.980515	2.40039e-13
ENSMUSG00000032501.10	Trib1	tribbles pseudokinase 1	1.38562	2.42284e-13
ENSMUSG00000025402.13	Nab2	Ngfi-A binding protein 2	-1.08809	2.46973e-13
ENSMUSG00000028991.16	Mtor	mechanistic target of rapamycin kinase	0.967327	2.52818e-13
ENSMUSG00000020181.19	Nav3	neuron navigator 3	4.19003	2.53598e-13
ENSMUSG00000021243.15	Fcf1	FCF1 rRNA processing protein	1.30561	2.55649e-13
ENSMUSG00000025037.7	Maoa	monoamine oxidase A	1.04149	2.62083e-13
ENSMUSG00000051615.15	Rap2a	RAS related protein 2a	-1.20975	2.65287e-13
ENSMUSG00000039191.13	Rbpj	recombination signal binding protein for immunoglobulin kappa J region	-1.07232	2.70997e-13
ENSMUSG00000048878.7	Hexim1	hexamethylene bis-acetamide inducible 1	0.986192	2.72131e-13
ENSMUSG00000030157.6	Clec2d	C-type lectin domain family 2, member d	0.932843	2.814e-13
ENSMUSG00000020326.8	Ccng1	cyclin G1	0.818935	2.84221e-13
ENSMUSG00000039953.14	Clstn1	calsyntenin 1	-0.833581	2.89743e-13
ENSMUSG00000024187.16	Fam234a	family with sequence similarity 234, member A	0.958033	2.93318e-13
ENSMUSG00000028470.11	Hint2	histidine triad nucleotide binding protein 2	2.0319	3.01852e-13
ENSMUSG00000066800.12	Rnasel	ribonuclease L (2', 5'-oligoisoadenylate synthetase-dependent)	-2.24404	3.03314e-13
ENSMUSG00000001025.9	S100a6	S100 calcium binding protein A6 (calcyclin)	-1.03416	3.06941e-13
ENSMUSG00000028078.15	Dclk2	doublecortin-like kinase 2	-1.39454	3.08967e-13
ENSMUSG00000041552.8	Ptchd1	patched domain containing 1	-2.2793	3.10981e-13
ENSMUSG00000028437.15	Ubap1	ubiquitin-associated protein 1	1.12684	3.13268e-13
ENSMUSG00000027778.16	Ift80	intraflagellar transport 80	-1.12107	3.17398e-13
ENSMUSG00000036863.13	Syde2	synapse defective 1, Rho GTPase, homolog 2 (C. elegans)	1.70847	3.36314e-13
ENSMUSG00000032300.8	1700017B05Rik	RIKEN cDNA 1700017B05 gene	0.937394	3.43e-13
ENSMUSG00000042675.16	Ypel3	yippee like 3	1.28615	3.48494e-13
ENSMUSG00000021709.15	Erbin	Erbb2 interacting protein	-0.819976	3.62229e-13
ENSMUSG00000034254.18	Agpat1	1-acylglycerol-3-phosphate O-acyltransferase 1 (lysophosphatidic acid acyltransferase, alpha)	1.01505	3.70825e-13
ENSMUSG00000024442.7	Dele1	DAP3 binding cell death enhancer 1	1.09208	3.74886e-13
ENSMUSG00000023967.10	Mrps18a	mitochondrial ribosomal protein S18A	1.18307	3.92284e-13
ENSMUSG00000040521.12	Tsfm	Ts translation elongation factor, mitochondrial	1.38262	4.13676e-13
ENSMUSG00000040415.16	Dtx3	deltex 3, E3 ubiquitin ligase	-1.10016	4.21204e-13
ENSMUSG00000022329.16	Stk3	serine/threonine kinase 3	-1.03113	4.40904e-13
ENSMUSG00000020869.9	Lrrc59	leucine rich repeat containing 59	0.908278	4.45033e-13
ENSMUSG00000010154.8	Spire2	spire type actin nucleation factor 2	-2.66233	4.56313e-13
ENSMUSG00000022682.9	Rrn3	RRN3 RNA polymerase I transcription factor homolog (yeast)	1.01687	4.67946e-13
ENSMUSG00000027799.13	Nbea	neurobeachin	-1.02014	4.74914e-13
ENSMUSG00000017428.17	Psmd11	proteasome (prosome, macropain) 26S subunit, non-ATPase, 11	0.88547	4.87941e-13
ENSMUSG00000005625.16	Psmd4	proteasome (prosome, macropain) 26S subunit, non-ATPase, 4	0.988563	4.9142e-13
ENSMUSG00000058966.14	Tlcd3b	TLC domain containing 3B	4.28814	4.91778e-13
ENSMUSG00000060152.15	Pop5	processing of precursor 5, ribonuclease P/MRP family (S. cerevisiae)	2.20066	4.94442e-13
ENSMUSG00000030643.15	Rab30	RAB30, member RAS oncogene family	-1.16129	4.9978e-13
ENSMUSG00000021773.12	Comtd1	catechol-O-methyltransferase domain containing 1	1.79687	5.0305e-13
ENSMUSG00000026102.10	Inpp1	inositol polyphosphate-1-phosphatase	-1.18711	5.13999e-13
ENSMUSG00000010663.6	Fads1	fatty acid desaturase 1	0.910795	5.15449e-13
ENSMUSG00000030286.7	Emc3	ER membrane protein complex subunit 3	1.00605	5.16407e-13
ENSMUSG00000032192.10	Gnb5	guanine nucleotide binding protein (G protein), beta 5	1.35268	5.5712e-13
ENSMUSG00000032363.16	Adamts7	a disintegrin-like and metallopeptidase (reprolysin type) with thrombospondin type 1 motif, 7	-1.49496	5.74813e-13
ENSMUSG00000001366.15	Fbxo9	f-box protein 9	1.22367	5.75263e-13
ENSMUSG00000002660.9	Clpp	caseinolytic mitochondrial matrix peptidase proteolytic subunit	1.15723	5.75868e-13
ENSMUSG00000019726.13	Lyst	lysosomal trafficking regulator	1.18683	5.9273e-13
ENSMUSG00000007812.17	Zfp655	zinc finger protein 655	0.896969	5.95106e-13
ENSMUSG00000030824.18	Nucb1	nucleobindin 1	-0.881435	5.9636e-13
ENSMUSG00000025579.15	Gaa	glucosidase, alpha, acid	-0.830273	5.98583e-13
ENSMUSG00000041731.14	Pgm5	phosphoglucomutase 5	-2.3625	6.11219e-13
ENSMUSG00000052459.14	Atp6v1a	ATPase, H+ transporting, lysosomal V1 subunit A	0.858158	6.30172e-13
ENSMUSG00000038776.14	Ephx1	epoxide hydrolase 1, microsomal	0.884499	6.3307e-13
ENSMUSG00000004070.16	Hmox2	heme oxygenase 2	1.18907	6.41904e-13
ENSMUSG00000054920.13	Klhl5	kelch-like 5	0.973005	6.42824e-13
ENSMUSG00000025511.16	Tspan4	tetraspanin 4	-0.974407	6.53556e-13
ENSMUSG00000046572.11	Zfp518b	zinc finger protein 518B	-1.34426	6.54433e-13
ENSMUSG00000005370.5	Msh6	mutS homolog 6	0.963704	6.75098e-13
ENSMUSG00000001436.16	Slc19a1	solute carrier family 19 (folate transporter), member 1	1.35843	6.80286e-13
ENSMUSG00000033060.17	Lmo7	LIM domain only 7	-1.34396	6.93358e-13
ENSMUSG00000003573.16	Homer3	homer scaffolding protein 3	-1.03696	7.41838e-13
ENSMUSG00000046994.10	Mars2	methionine-tRNA synthetase 2 (mitochondrial)	1.38667	7.42967e-13
ENSMUSG00000039414.11	Heatr5b	HEAT repeat containing 5B	0.913185	7.46377e-13
ENSMUSG00000062184.12	Hs6st2	heparan sulfate 6-O-sulfotransferase 2	-1.62467	7.76394e-13
ENSMUSG00000046761.14	Fam83h	family with sequence similarity 83, member H	1.35044	8.03516e-13
ENSMUSG00000030956.16	Fam53b	family with sequence similarity 53, member B	1.04833	8.20484e-13
ENSMUSG00000072620.4	Slfn2	schlafen 2	3.52384	8.21532e-13
ENSMUSG00000062300.15	Nectin2	nectin cell adhesion molecule 2	1.15248	8.40178e-13
ENSMUSG00000021149.9	Gtpbp4	GTP binding protein 4	1.02085	8.40747e-13
ENSMUSG00000018800.15	Abca5	ATP-binding cassette, sub-family A (ABC1), member 5	-1.00974	8.58517e-13
ENSMUSG00000047414.7	Flrt2	fibronectin leucine rich transmembrane protein 2	-1.24545	8.74978e-13
ENSMUSG00000029095.18	Ablim2	actin-binding LIM protein 2	3.39041	8.78255e-13
ENSMUSG00000038046.5	Mrm3	mitochondrial rRNA methyltransferase 3	1.89226	9.16443e-13
ENSMUSG00000019923.15	Zwint	ZW10 interactor	0.917927	9.33834e-13
ENSMUSG00000033272.13	Slc35a4	solute carrier family 35, member A4	1.37956	9.35377e-13
ENSMUSG00000050910.6	Cdr2l	cerebellar degeneration-related protein 2-like	-1.17026	9.39629e-13
ENSMUSG00000040212.13	Emp3	epithelial membrane protein 3	-1.41567	9.641e-13
ENSMUSG00000035642.17	Aamdc	adipogenesis associated Mth938 domain containing	1.51293	9.8622e-13
ENSMUSG00000019689.5	Fmc1	formation of mitochondrial complex V assembly factor 1	1.86795	9.91732e-13
ENSMUSG00000028184.13	Adgrl2	adhesion G protein-coupled receptor L2	-1.47126	1.01073e-12
ENSMUSG00000018425.19	Dhx40	DEAH (Asp-Glu-Ala-His) box polypeptide 40	0.946002	1.01934e-12
ENSMUSG00000020536.13	Llgl1	LLGL1 scribble cell polarity complex component	-1.06763	1.06401e-12
ENSMUSG00000038702.7	Dsel	dermatan sulfate epimerase-like	-1.05707	1.10377e-12
ENSMUSG00000024070.16	Prkd3	protein kinase D3	-0.87125	1.1428e-12
ENSMUSG00000022231.11	Sema5a	sema domain, seven thrombospondin repeats (type 1 and type 1-like), transmembrane domain (TM) and short cytoplasmic domain, (semaphorin) 5A	-1.13637	1.15075e-12
ENSMUSG00000017376.16	Nlk	nemo like kinase	1.19052	1.1508e-12
ENSMUSG00000050627.14	Gpd1l	glycerol-3-phosphate dehydrogenase 1-like	1.07452	1.16757e-12
ENSMUSG00000010461.17	Eya4	EYA transcriptional coactivator and phosphatase 4	-2.01348	1.18521e-12
ENSMUSG00000046561.10	Arsj	arylsulfatase J	-1.1304	1.24347e-12
ENSMUSG00000046694.7	Tent5b	terminal nucleotidyltransferase 5B	2.77647	1.24734e-12
ENSMUSG00000067586.5	S1pr3	sphingosine-1-phosphate receptor 3	-1.11717	1.24997e-12
ENSMUSG00000063015.13	Ccni	cyclin I	0.821343	1.27453e-12
ENSMUSG00000020634.13	Ubxn2a	UBX domain protein 2A	1.26096	1.30775e-12
ENSMUSG00000028487.19	Bnc2	basonuclin 2	-1.05179	1.31005e-12
ENSMUSG00000023972.11	Ptk7	PTK7 protein tyrosine kinase 7	-0.856729	1.35189e-12
ENSMUSG00000056216.10	Cebpg	CCAAT/enhancer binding protein (C/EBP), gamma	0.848499	1.36033e-12
ENSMUSG00000051486.6	Pcdhb11	protocadherin beta 11	-1.55525	1.36752e-12
ENSMUSG00000079111.4	Kdelr2	KDEL (Lys-Asp-Glu-Leu) endoplasmic reticulum protein retention receptor 2	-0.872179	1.37064e-12
ENSMUSG00000042041.8	2010003K11Rik	RIKEN cDNA 2010003K11 gene	10.5093	1.39952e-12
ENSMUSG00000002949.16	Timm44	translocase of inner mitochondrial membrane 44	0.989627	1.44906e-12
ENSMUSG00000019797.12	Mtres1	mitochondrial transcription rescue factor 1	1.51501	1.47084e-12
ENSMUSG00000021760.6	Gpx8	glutathione peroxidase 8 (putative)	1.00972	1.52682e-12
ENSMUSG00000013033.17	Adgrl1	adhesion G protein-coupled receptor L1	-0.953961	1.53733e-12
ENSMUSG00000024664.6	Fads3	fatty acid desaturase 3	0.839857	1.53924e-12
ENSMUSG00000032401.16	Lctl	lactase-like	10.2145	1.57763e-12
ENSMUSG00000022010.20	Tsc22d1	TSC22 domain family, member 1	0.82215	1.63013e-12
ENSMUSG00000031095.16	Cul4b	cullin 4B	0.878209	1.68937e-12
ENSMUSG00000024594.10	Prrc1	proline-rich coiled-coil 1	-0.978133	1.70093e-12
ENSMUSG00000070047.15	Fat1	FAT atypical cadherin 1	-0.849292	1.72216e-12
ENSMUSG00000004317.15	Clcn5	chloride channel, voltage-sensitive 5	-0.882578	1.78788e-12
ENSMUSG00000026496.12	Parp1	poly (ADP-ribose) polymerase family, member 1	0.890297	1.94785e-12
ENSMUSG00000032402.13	Smad3	SMAD family member 3	-1.03066	1.99463e-12
ENSMUSG00000038936.14	Sccpdh	saccharopine dehydrogenase (putative)	1.15336	2.03579e-12
ENSMUSG00000004328.16	Hif3a	hypoxia inducible factor 3, alpha subunit	6.63807	2.04815e-12
ENSMUSG00000025525.13	Apool	apolipoprotein O-like	1.36018	2.05478e-12
ENSMUSG00000033918.17	Parl	presenilin associated, rhomboid-like	1.13683	2.0598e-12
ENSMUSG00000021650.8	Ptcd2	pentatricopeptide repeat domain 2	1.3817	2.06008e-12
ENSMUSG00000022391.17	Rangap1	RAN GTPase activating protein 1	1.03677	2.08139e-12
ENSMUSG00000020386.6	Sar1b	secretion associated Ras related GTPase 1B	1.15443	2.2024e-12
ENSMUSG00000042524.15	Sun2	Sad1 and UNC84 domain containing 2	0.963009	2.41863e-12
ENSMUSG00000023034.8	Nr4a1	nuclear receptor subfamily 4, group A, member 1	1.68102	2.47262e-12
ENSMUSG00000044167.7	Foxo1	forkhead box O1	1.02866	2.4744e-12
ENSMUSG00000028036.7	Ptgfr	prostaglandin F receptor	-1.00159	2.49637e-12
ENSMUSG00000044786.7	Zfp36	zinc finger protein 36	1.36951	2.59459e-12
ENSMUSG00000031015.9	Swap70	SWA-70 protein	-1.10388	2.64479e-12
ENSMUSG00000027555.9	Car13	carbonic anhydrase 13	1.37103	2.65442e-12
ENSMUSG00000032350.10	Gclc	glutamate-cysteine ligase, catalytic subunit	1.35887	2.70992e-12
ENSMUSG00000026037.15	Orc2	origin recognition complex, subunit 2	1.22181	2.73482e-12
ENSMUSG00000027088.11	Phospho2	phosphatase, orphan 2	1.15457	2.74049e-12
ENSMUSG00000037451.9	Slc22a20	solute carrier family 22 (organic anion transporter), member 20	7.64344	2.74431e-12
ENSMUSG00000018995.13	Nars2	asparaginyl-tRNA synthetase 2 (mitochondrial)(putative)	1.57012	2.76955e-12
ENSMUSG00000006299.14	Aamp	angio-associated migratory protein	0.857456	2.80703e-12
ENSMUSG00000024870.7	Rab1b	RAB1B, member RAS oncogene family	0.889494	2.89661e-12
ENSMUSG00000032925.17	Itgbl1	integrin, beta-like 1	-1.23006	2.92309e-12
ENSMUSG00000036580.16	Spg20	spastic paraplegia 20, spartin (Troyer syndrome) homolog (human)	-1.02985	2.96092e-12
ENSMUSG00000021123.13	Rdh12	retinol dehydrogenase 12	2.55191	2.98429e-12
ENSMUSG00000066441.15	Rdh11	retinol dehydrogenase 11	1.15368	3.05004e-12
ENSMUSG00000040018.10	Cox15	cytochrome c oxidase assembly protein 15	1.14394	3.1355e-12
ENSMUSG00000044043.5	Pcdhb14	protocadherin beta 14	-1.24212	3.13589e-12
ENSMUSG00000012519.15	Mlkl	mixed lineage kinase domain-like	1.4884	3.1606e-12
ENSMUSG00000043313.7	Pcdhb19	protocadherin beta 19	-1.16198	3.19363e-12
ENSMUSG00000041020.15	Map7d2	MAP7 domain containing 2	10.0732	3.38314e-12
ENSMUSG00000043991.6	Pura	purine rich element binding protein A	-0.945857	3.51963e-12
ENSMUSG00000041801.6	Phlda3	pleckstrin homology like domain, family A, member 3	0.868443	3.56901e-12
ENSMUSG00000033964.13	Zbtb41	zinc finger and BTB domain containing 41	0.951186	3.58107e-12
ENSMUSG00000029674.14	Limk1	LIM-domain containing, protein kinase	1.07694	3.59498e-12
ENSMUSG00000031168.15	Ebp	phenylalkylamine Ca2+ antagonist (emopamil) binding protein	1.2365	3.67902e-12
ENSMUSG00000027221.6	Chst1	carbohydrate sulfotransferase 1	1.85876	3.83947e-12
ENSMUSG00000036273.16	Lrrk2	leucine-rich repeat kinase 2	-1.1387	3.94841e-12
ENSMUSG00000039512.13	Uhrf1bp1	UHRF1 (ICBP90) binding protein 1	0.947312	4.01149e-12
ENSMUSG00000074794.11	Arrdc3	arrestin domain containing 3	-0.981127	4.06842e-12
ENSMUSG00000063687.4	Pcdhb5	protocadherin beta 5	-1.85219	4.12095e-12
ENSMUSG00000043683.5	Fem1a	fem 1 homolog a	0.967892	4.23323e-12
ENSMUSG00000000532.12	Acvr1b	activin A receptor, type 1B	1.15281	4.33553e-12
ENSMUSG00000022367.8	Has2	hyaluronan synthase 2	-0.873326	4.46503e-12
ENSMUSG00000029385.15	Ccng2	cyclin G2	0.911435	4.47986e-12
ENSMUSG00000031533.5	Mrps31	mitochondrial ribosomal protein S31	1.29189	4.76125e-12
ENSMUSG00000057706.8	Mex3b	mex3 RNA binding family member B	-1.82087	4.76236e-12
ENSMUSG00000020079.16	Supv3l1	suppressor of var1, 3-like 1 (S. cerevisiae)	1.30717	4.81015e-12
ENSMUSG00000044197.9	Gpr146	G protein-coupled receptor 146	1.31084	4.85213e-12
ENSMUSG00000045795.11	Whamm	WAS protein homolog associated with actin, golgi membranes and microtubules	1.61216	4.93045e-12
ENSMUSG00000026421.15	Csrp1	cysteine and glycine-rich protein 1	0.981869	5.04118e-12
ENSMUSG00000024782.8	Ak3	adenylate kinase 3	0.833114	5.13062e-12
ENSMUSG00000019979.13	Apaf1	apoptotic peptidase activating factor 1	-1.0588	5.14339e-12
ENSMUSG00000020900.16	Myh10	myosin, heavy polypeptide 10, non-muscle	0.805307	5.19442e-12
ENSMUSG00000024556.5	Me2	malic enzyme 2, NAD(+)-dependent, mitochondrial	1.07196	5.28788e-12
ENSMUSG00000021037.8	Ahsa1	AHA1, activator of heat shock protein ATPase 1	0.967699	5.35612e-12
ENSMUSG00000036975.6	Tmem177	transmembrane protein 177	1.72104	5.58096e-12
ENSMUSG00000025269.17	Apex2	apurinic/apyrimidinic endonuclease 2	1.24616	5.58946e-12
ENSMUSG00000030972.7	Acsm5	acyl-CoA synthetase medium-chain family member 5	10.2584	5.66128e-12
ENSMUSG00000035860.10	Cdhr3	cadherin-related family member 3	10.2531	5.78929e-12
ENSMUSG00000033623.14	Pcgf3	polycomb group ring finger 3	-0.900096	5.86885e-12
ENSMUSG00000023259.18	Slc26a6	solute carrier family 26, member 6	1.5926	5.88955e-12
ENSMUSG00000051149.16	Adnp	activity-dependent neuroprotective protein	-1.09176	6.01034e-12
ENSMUSG00000027381.17	Bcl2l11	BCL2-like 11 (apoptosis facilitator)	-0.895784	6.03197e-12
ENSMUSG00000078713.9	Tomm5	translocase of outer mitochondrial membrane 5	1.15169	6.05134e-12
ENSMUSG00000045776.4	Lrtm1	leucine-rich repeats and transmembrane domains 1	10.2855	6.07694e-12
ENSMUSG00000031129.10	Slc9a9	solute carrier family 9 (sodium/hydrogen exchanger), member 9	-2.29962	6.15628e-12
ENSMUSG00000018593.14	Sparc	secreted acidic cysteine rich glycoprotein	-0.809554	6.45391e-12
ENSMUSG00000027108.16	Ola1	Obg-like ATPase 1	0.90482	6.49e-12
ENSMUSG00000038058.15	Nod1	nucleotide-binding oligomerization domain containing 1	1.24448	6.53364e-12
ENSMUSG00000049119.15	Fam110b	family with sequence similarity 110, member B	-1.36295	7.01324e-12
ENSMUSG00000036309.15	Skp1	S-phase kinase-associated protein 1	0.803236	7.06531e-12
ENSMUSG00000038349.11	Plcl1	phospholipase C-like 1	-1.75892	7.07383e-12
ENSMUSG00000047409.14	Ctdspl	CTD (carboxy-terminal domain, RNA polymerase II, polypeptide A) small phosphatase-like	1.0231	7.17727e-12
ENSMUSG00000007041.10	Clic1	chloride intracellular channel 1	-0.873084	7.31771e-12
ENSMUSG00000030683.12	Sez6l2	seizure related 6 homolog like 2	3.57673	7.36224e-12
ENSMUSG00000025488.10	Cox8b	cytochrome c oxidase subunit 8B	9.92582	7.44854e-12
ENSMUSG00000021497.11	Txndc15	thioredoxin domain containing 15	1.02135	7.48133e-12
ENSMUSG00000061751.17	Kalrn	kalirin, RhoGEF kinase	-1.34725	7.55055e-12
ENSMUSG00000002280.12	Ciao3	cytosolic iron-sulfur assembly component 3	1.13304	8.04609e-12
ENSMUSG00000031805.18	Jak3	Janus kinase 3	1.32356	8.10045e-12
ENSMUSG00000026377.13	Nifk	nucleolar protein interacting with the FHA domain of MKI67	1.07823	8.16884e-12
ENSMUSG00000043496.8	Tril	TLR4 interactor with leucine-rich repeats	-1.51795	8.21256e-12
ENSMUSG00000067722.5	BC003965	cDNA sequence BC003965	1.1626	8.31815e-12
ENSMUSG00000018909.16	Arrb1	arrestin, beta 1	0.941208	8.34933e-12
ENSMUSG00000036036.16	Zfp57	zinc finger protein 57	-1.63044	8.60415e-12
ENSMUSG00000085795.9	Zfp703	zinc finger protein 703	1.14316	8.73915e-12
ENSMUSG00000038663.8	Fsd2	fibronectin type III and SPRY domain containing 2	5.9817	8.90612e-12
ENSMUSG00000023186.15	Vwa5a	von Willebrand factor A domain containing 5A	-0.907317	9.66398e-12
ENSMUSG00000032387.16	Rbpms2	RNA binding protein with multiple splicing 2	2.20068	9.70032e-12
ENSMUSG00000027274.17	Mkks	McKusick-Kaufman syndrome	1.11244	9.73903e-12
ENSMUSG00000020483.15	Dynll2	dynein light chain LC8-type 2	0.954388	9.96667e-12
ENSMUSG00000039254.17	Pomt1	protein-O-mannosyltransferase 1	1.17163	1.00086e-11
ENSMUSG00000023110.13	Prmt5	protein arginine N-methyltransferase 5	1.04392	1.04411e-11
ENSMUSG00000032228.17	Tcf12	transcription factor 12	-0.859763	1.08382e-11
ENSMUSG00000027122.16	Arl14ep	ADP-ribosylation factor-like 14 effector protein	-0.942393	1.13137e-11
ENSMUSG00000020520.15	Galnt10	polypeptide N-acetylgalactosaminyltransferase 10	-0.968346	1.13909e-11
ENSMUSG00000001034.18	Mapk7	mitogen-activated protein kinase 7	-1.12642	1.15238e-11
ENSMUSG00000028664.15	Ephb2	Eph receptor B2	-1.0345	1.18815e-11
ENSMUSG00000058135.13	Gstm1	glutathione S-transferase, mu 1	0.98265	1.20456e-11
ENSMUSG00000004947.16	Dtx2	deltex 2, E3 ubiquitin ligase	1.08205	1.21905e-11
ENSMUSG00000039989.8	Cbx4	chromobox 4	1.08553	1.22416e-11
ENSMUSG00000025154.16	Arhgap19	Rho GTPase activating protein 19	1.84939	1.23382e-11
ENSMUSG00000026519.17	Tmem63a	transmembrane protein 63a	-1.06635	1.24253e-11
ENSMUSG00000030317.9	Timp4	tissue inhibitor of metalloproteinase 4	2.91645	1.27094e-11
ENSMUSG00000040254.12	Sema3d	sema domain, immunoglobulin domain (Ig), short basic domain, secreted, (semaphorin) 3D	-3.12734	1.33943e-11
ENSMUSG00000031834.16	Pik3r2	phosphoinositide-3-kinase regulatory subunit 2	-0.950316	1.34034e-11
ENSMUSG00000031431.14	Tsc22d3	TSC22 domain family, member 3	0.968664	1.36572e-11
ENSMUSG00000032306.15	Mpi	mannose phosphate isomerase	1.32524	1.37593e-11
ENSMUSG00000037410.14	Tbc1d2b	TBC1 domain family, member 2B	-0.838252	1.3862e-11
ENSMUSG00000020623.12	Map2k6	mitogen-activated protein kinase kinase 6	-1.72557	1.3874e-11
ENSMUSG00000048578.12	Mlec	malectin	0.815748	1.39081e-11
ENSMUSG00000002325.16	Irf9	interferon regulatory factor 9	-1.49762	1.39868e-11
ENSMUSG00000021606.9	Ndufs6	NADH:ubiquinone oxidoreductase core subunit S6	1.25328	1.54222e-11
ENSMUSG00000006315.10	Tmem147	transmembrane protein 147	1.1793	1.56279e-11
ENSMUSG00000056899.11	Immp2l	IMP2 inner mitochondrial membrane peptidase-like (S. cerevisiae)	2.28369	1.58028e-11
ENSMUSG00000052428.11	Tmco1	transmembrane and coiled-coil domains 1	0.940042	1.58086e-11
ENSMUSG00000039063.6	Echdc3	enoyl Coenzyme A hydratase domain containing 3	1.49852	1.59614e-11
ENSMUSG00000042797.10	Aqp11	aquaporin 11	2.40153	1.59906e-11
ENSMUSG00000034645.15	Zyg11a	zyg-11 family member A, cell cycle regulator	5.59984	1.62162e-11
ENSMUSG00000055723.7	Rras2	related RAS viral (r-ras) oncogene 2	1.36325	1.71338e-11
ENSMUSG00000021994.16	Wnt5a	wingless-type MMTV integration site family, member 5A	-0.98434	1.74777e-11
ENSMUSG00000001473.8	Tubb6	tubulin, beta 6 class V	-1.17048	1.76842e-11
ENSMUSG00000037216.6	Lipt1	lipoyltransferase 1	2.21426	1.80031e-11
ENSMUSG00000021178.10	Psmc1	protease (prosome, macropain) 26S subunit, ATPase 1	0.914362	1.81827e-11
ENSMUSG00000037148.9	Arhgap10	Rho GTPase activating protein 10	-0.942317	1.833e-11
ENSMUSG00000052727.7	Map1b	microtubule-associated protein 1B	-1.27286	1.86487e-11
ENSMUSG00000045932.13	Ifit2	interferon-induced protein with tetratricopeptide repeats 2	-1.69094	1.87151e-11
ENSMUSG00000048583.17	Igf2	insulin-like growth factor 2	-0.987727	1.87154e-11
ENSMUSG00000026837.17	Col5a1	collagen, type V, alpha 1	-0.831511	1.88453e-11
ENSMUSG00000035181.7	Heatr5a	HEAT repeat containing 5A	-0.825235	1.94439e-11
ENSMUSG00000033685.14	Ucp2	uncoupling protein 2 (mitochondrial, proton carrier)	1.03839	1.96956e-11
ENSMUSG00000032014.7	Oaf	out at first homolog	-0.980469	1.99273e-11
ENSMUSG00000029536.9	Gatc	glutamyl-tRNA(Gln) amidotransferase, subunit C	1.34391	2.01003e-11
ENSMUSG00000034349.15	Smc4	structural maintenance of chromosomes 4	-0.899974	2.01655e-11
ENSMUSG00000074793.11	Hspa12b	heat shock protein 12B	-1.17702	2.03637e-11
ENSMUSG00000037949.9	Ano10	anoctamin 10	0.848944	2.13647e-11
ENSMUSG00000002475.17	Abhd3	abhydrolase domain containing 3	3.17611	2.15287e-11
ENSMUSG00000041895.16	Wipi1	WD repeat domain, phosphoinositide interacting 1	-1.59128	2.19415e-11
ENSMUSG00000026956.16	Uap1l1	UDP-N-acteylglucosamine pyrophosphorylase 1-like 1	-0.958564	2.20387e-11
ENSMUSG00000037010.8	Apln	apelin	1.58007	2.2357e-11
ENSMUSG00000007805.5	Twist2	twist basic helix-loop-helix transcription factor 2	-0.992607	2.24288e-11
ENSMUSG00000078656.12	Vps25	vacuolar protein sorting 25	1.03005	2.25377e-11
ENSMUSG00000067818.7	Myl9	myosin, light polypeptide 9, regulatory	-2.41248	2.35134e-11
ENSMUSG00000055027.18	Smyd1	SET and MYND domain containing 1	9.70653	2.37258e-11
ENSMUSG00000017801.16	Mlx	MAX-like protein X	1.14458	2.42365e-11
ENSMUSG00000040557.15	Mettl27	methyltransferase like 27	1.56275	2.42536e-11
ENSMUSG00000020167.15	Tcf3	transcription factor 3	-0.830621	2.44283e-11
ENSMUSG00000066621.13	Tecpr1	tectonin beta-propeller repeat containing 1	0.96017	2.46305e-11
ENSMUSG00000025353.6	Ormdl2	ORM1-like 2 (S. cerevisiae)	1.80745	2.49523e-11
ENSMUSG00000025421.16	Hdhd2	haloacid dehalogenase-like hydrolase domain containing 2	1.0582	2.52988e-11
ENSMUSG00000032526.12	Ss18l2	SS18, nBAF chromatin remodeling complex subunit like 2	1.57072	2.53735e-11
ENSMUSG00000040253.16	Gbp7	guanylate binding protein 7	-1.65297	2.54721e-11
ENSMUSG00000022412.15	Mief1	mitochondrial elongation factor 1	0.962767	2.58963e-11
ENSMUSG00000074825.5	Itpripl1	inositol 1,4,5-triphosphate receptor interacting protein-like 1	1.85701	2.64773e-11
ENSMUSG00000048755.10	Mcat	malonyl CoA:ACP acyltransferase (mitochondrial)	1.15888	2.65666e-11
ENSMUSG00000001999.16	Blvra	biliverdin reductase A	1.3582	2.75878e-11
ENSMUSG00000059456.14	Ptk2b	PTK2 protein tyrosine kinase 2 beta	1.0795	2.79388e-11
ENSMUSG00000020022.18	Ndufa12	NADH:ubiquinone oxidoreductase subunit A12	1.44602	2.87874e-11
ENSMUSG00000024330.18	Col11a2	collagen, type XI, alpha 2	1.50372	3.05065e-11
ENSMUSG00000030921.18	Trim30a	tripartite motif-containing 30A	-1.44574	3.08223e-11
ENSMUSG00000015843.11	Rxrg	retinoid X receptor gamma	9.95693	3.08817e-11
ENSMUSG00000022114.6	Spry2	sprouty RTK signaling antagonist 2	-1.01717	3.10312e-11
ENSMUSG00000004035.13	Gstm7	glutathione S-transferase, mu 7	4.76006	3.16376e-11
ENSMUSG00000022723.17	Crybg3	beta-gamma crystallin domain containing 3	-0.996044	3.19401e-11
ENSMUSG00000041241.13	Mul1	mitochondrial ubiquitin ligase activator of NFKB 1	1.08262	3.20496e-11
ENSMUSG00000020264.6	Slc36a2	solute carrier family 36 (proton/amino acid symporter), member 2	9.6429	3.23853e-11
ENSMUSG00000030268.18	Bcat1	branched chain aminotransferase 1, cytosolic	-1.77635	3.30908e-11
ENSMUSG00000026273.14	Mterf4	mitochondrial transcription termination factor 4	1.54268	3.33124e-11
ENSMUSG00000032353.10	Tmed3	transmembrane p24 trafficking protein 3	-0.884837	3.49164e-11
ENSMUSG00000026029.15	Casp8	caspase 8	1.09016	3.49759e-11
ENSMUSG00000030774.14	Pak1	p21 (RAC1) activated kinase 1	-1.39148	3.62463e-11
ENSMUSG00000030465.20	Psd3	pleckstrin and Sec7 domain containing 3	-0.870719	3.74429e-11
ENSMUSG00000047735.15	Samd9l	sterile alpha motif domain containing 9-like	-0.949581	3.77937e-11
ENSMUSG00000044548.12	Dact1	dishevelled-binding antagonist of beta-catenin 1	-2.00511	3.89139e-11
ENSMUSG00000026836.16	Acvr1	activin A receptor, type 1	-1.51295	4.0376e-11
ENSMUSG00000023089.13	Ndufa5	NADH:ubiquinone oxidoreductase subunit A5	1.16387	4.11201e-11
ENSMUSG00000078735.5	Il11ra2	interleukin 11 receptor, alpha chain 2	-1.46095	4.13067e-11
ENSMUSG00000057963.10	Itpk1	inositol 1,3,4-triphosphate 5/6 kinase	1.35537	4.1548e-11
ENSMUSG00000030409.17	Dmpk	dystrophia myotonica-protein kinase	1.1885	4.21088e-11
ENSMUSG00000033715.16	Akr1c14	aldo-keto reductase family 1, member C14	-1.13472	4.219e-11
ENSMUSG00000052712.18	BC004004	cDNA sequence BC004004	0.990924	4.29986e-11
ENSMUSG00000043542.13	Zc2hc1a	zinc finger, C2HC-type containing 1A	-1.06809	4.32789e-11
ENSMUSG00000005069.13	Pex5	peroxisomal biogenesis factor 5	0.822147	4.366e-11
ENSMUSG00000035051.16	Dhx57	DEAH (Asp-Glu-Ala-Asp/His) box polypeptide 57	-1.01599	4.37513e-11
ENSMUSG00000041571.11	Selenow	selenoprotein W	-1.0421	4.4042e-11
ENSMUSG00000019122.9	Ccl9	chemokine (C-C motif) ligand 9	1.52217	4.46504e-11
ENSMUSG00000034245.11	Hdac11	histone deacetylase 11	-1.16247	4.54072e-11
ENSMUSG00000029061.3	Mmp23	matrix metallopeptidase 23	-1.35007	4.64013e-11
ENSMUSG00000078794.5	Dact3	dishevelled-binding antagonist of beta-catenin 3	-1.29657	4.84149e-11
ENSMUSG00000033192.6	Lpcat2	lysophosphatidylcholine acyltransferase 2	-1.57404	4.84801e-11
ENSMUSG00000022371.17	Col14a1	collagen, type XIV, alpha 1	-3.96033	4.98116e-11
ENSMUSG00000001435.16	Col18a1	collagen, type XVIII, alpha 1	0.843339	5.10876e-11
ENSMUSG00000032383.8	Ppib	peptidylprolyl isomerase B	-0.820413	5.28258e-11
ENSMUSG00000051236.14	Msrb3	methionine sulfoxide reductase B3	-0.918425	5.34225e-11
ENSMUSG00000033475.16	Tomm6	translocase of outer mitochondrial membrane 6	0.961734	5.34885e-11
ENSMUSG00000024376.8	Epb41l4a	erythrocyte membrane protein band 4.1 like 4a	-1.65838	5.39076e-11
ENSMUSG00000027678.18	Ncoa3	nuclear receptor coactivator 3	-0.9852	5.77436e-11
ENSMUSG00000061780.7	Cfd	complement factor D (adipsin)	11.4585	5.88087e-11
ENSMUSG00000026475.8	Rgs16	regulator of G-protein signaling 16	-1.7722	5.95863e-11
ENSMUSG00000030278.12	Cidec	cell death-inducing DFFA-like effector c	14.0902	6.05222e-11
ENSMUSG00000057561.11	Eif1a	eukaryotic translation initiation factor 1A	0.834522	6.06041e-11
[truncated: 2,076 more rows]

## Sheet: DE_mRNA_hDPSC-Exo
List of differentially expressed mRNAs in hDPSC-Exos vs Diff
Gene_ID	Symbol	Description	log2FC	Pvalue
ENSMUSG00000027966.21	Col11a1	collagen, type XI, alpha 1	1.68149	5.55916e-80
ENSMUSG00000042436.13	Mfap4	microfibrillar-associated protein 4	3.39871	1.25489e-78
ENSMUSG00000026193.16	Fn1	fibronectin 1	1.34784	2.11349e-75
ENSMUSG00000029661.17	Col1a2	collagen, type I, alpha 2	1.24422	3.4833e-66
ENSMUSG00000023885.10	Thbs2	thrombospondin 2	1.42365	3.32276e-61
ENSMUSG00000027204.14	Fbn1	fibrillin 1	1.35628	1.54111e-60
ENSMUSG00000022040.9	Ephx2	epoxide hydrolase 2, cytoplasmic	-1.83281	7.81588e-59
ENSMUSG00000022816.12	Fstl1	follistatin-like 1	1.17844	2.68341e-57
ENSMUSG00000024501.21	Dpysl3	dihydropyrimidinase-like 3	1.40627	8.74672e-55
ENSMUSG00000035783.10	Acta2	actin alpha 2, smooth muscle, aorta	1.91537	1.4643e-54
ENSMUSG00000024529.15	Lox	lysyl oxidase	1.17096	6.98508e-54
ENSMUSG00000037206.16	Islr	immunoglobulin superfamily containing leucine-rich repeat	1.8573	1.48567e-52
ENSMUSG00000021390.7	Ogn	osteoglycin	1.60035	2.63042e-52
ENSMUSG00000021186.10	Fbln5	fibulin 5	1.63416	8.50616e-52
ENSMUSG00000025479.10	Cyp2e1	cytochrome P450, family 2, subfamily e, polypeptide 1	-1.774	5.96644e-51
ENSMUSG00000031980.11	Agt	angiotensinogen (serpin peptidase inhibitor, clade A, member 8)	-1.21638	2.2687e-50
ENSMUSG00000067276.6	Capn6	calpain 6	1.33354	3.93031e-49
ENSMUSG00000027750.17	Postn	periostin, osteoblast specific factor	1.19313	7.64846e-49
ENSMUSG00000000753.16	Serpinf1	serine (or cysteine) peptidase inhibitor, clade F, member 1	1.26785	2.80806e-48
ENSMUSG00000002831.15	Plin4	perilipin 4	-1.12105	7.7364e-48
ENSMUSG00000026043.19	Col3a1	collagen, type III, alpha 1	1.11821	2.46304e-46
ENSMUSG00000028494.13	Plin2	perilipin 2	-1.21055	1.41802e-43
ENSMUSG00000026922.14	Agpat2	1-acylglycerol-3-phosphate O-acyltransferase 2 (lysophosphatidic acid acyltransferase, beta)	-1.19375	1.50641e-43
ENSMUSG00000029718.15	Pcolce	procollagen C-endopeptidase enhancer protein	1.10731	5.66187e-42
ENSMUSG00000021701.9	Plk2	polo like kinase 2	1.87769	1.24967e-41
ENSMUSG00000032332.18	Col12a1	collagen, type XII, alpha 1	1.33037	4.85727e-41
ENSMUSG00000001506.11	Col1a1	collagen, type I, alpha 1	1.35742	5.92162e-41
ENSMUSG00000030208.16	Emp1	epithelial membrane protein 1	1.42473	7.79597e-41
ENSMUSG00000031375.18	Bgn	biglycan	1.20856	2.31421e-40
ENSMUSG00000029838.12	Ptn	pleiotrophin	1.05686	2.57623e-37
ENSMUSG00000061780.7	Cfd	complement factor D (adipsin)	-1.04883	4.53627e-37
ENSMUSG00000030826.20	Bcat2	branched chain aminotransferase 2, mitochondrial	-1.02499	4.81405e-37
ENSMUSG00000021388.15	Aspn	asporin	1.07084	8.50141e-37
ENSMUSG00000029304.15	Spp1	secreted phosphoprotein 1	2.14619	9.47153e-37
ENSMUSG00000064080.13	Fbln2	fibulin 2	1.01038	1.38013e-36
ENSMUSG00000005124.11	Ccn4	cellular communication network factor 4	1.56524	1.85446e-35
ENSMUSG00000022878.6	Adipoq	adiponectin, C1Q and collagen domain containing	-1.09518	1.96987e-35
ENSMUSG00000032925.17	Itgbl1	integrin, beta-like 1	1.67912	1.54533e-34
ENSMUSG00000041798.16	Gck	glucokinase	-1.63519	3.31819e-34
ENSMUSG00000037071.4	Scd1	stearoyl-Coenzyme A desaturase 1	-1.09572	4.61317e-34
ENSMUSG00000056973.7	Ces1d	carboxylesterase 1D	-1.19453	1.03468e-33
ENSMUSG00000031595.10	Pdgfrl	platelet-derived growth factor receptor-like	1.82219	1.05802e-33
ENSMUSG00000046324.13	Ermp1	endoplasmic reticulum metallopeptidase 1	-1.0856	1.56667e-33
ENSMUSG00000022231.11	Sema5a	sema domain, seven thrombospondin repeats (type 1 and type 1-like), transmembrane domain (TM) and short cytoplasmic domain, (semaphorin) 5A	1.56233	2.15997e-33
ENSMUSG00000035686.9	Thrsp	thyroid hormone responsive	-0.956117	2.47978e-33
ENSMUSG00000062515.4	Fabp4	fatty acid binding protein 4, adipocyte	-1.03847	3.2077e-33
ENSMUSG00000003123.16	Lipe	lipase, hormone sensitive	-1.07702	4.56732e-33
ENSMUSG00000031004.9	Mki67	antigen identified by monoclonal antibody Ki 67	1.91227	1.22389e-32
ENSMUSG00000030074.10	Gxylt2	glucoside xylosyltransferase 2	1.25212	1.63007e-32
ENSMUSG00000016262.15	Sertad4	SERTA domain containing 4	1.77758	2.54335e-32
ENSMUSG00000015568.17	Lpl	lipoprotein lipase	-0.88938	1.59421e-31
ENSMUSG00000068196.6	Col8a1	collagen, type VIII, alpha 1	2.92342	4.22706e-31
ENSMUSG00000002944.16	Cd36	CD36 molecule	-1.08601	6.24282e-31
ENSMUSG00000027848.13	Olfml3	olfactomedin-like 3	1.52553	1.01079e-30
ENSMUSG00000007097.15	Atp1a2	ATPase, Na+/K+ transporting, alpha 2 polypeptide	-0.951586	2.51074e-30
ENSMUSG00000042804.14	Gpr153	G protein-coupled receptor 153	1.3198	3.30364e-30
ENSMUSG00000028364.16	Tnc	tenascin C	1.90119	3.36034e-30
ENSMUSG00000020089.9	Ppa1	pyrophosphatase (inorganic) 1	-1.10732	4.08415e-30
ENSMUSG00000022098.11	Bmp1	bone morphogenetic protein 1	1.01148	6.58509e-30
ENSMUSG00000056666.14	Retsat	retinol saturase (all trans retinol 13,14 reductase)	-1.02923	8.76755e-30
ENSMUSG00000001300.17	Efnb2	ephrin B2	1.80168	1.09556e-29
ENSMUSG00000029093.15	Sorcs2	sortilin-related VPS10 domain containing receptor 2	1.60266	3.36428e-29
ENSMUSG00000018796.14	Acsl1	acyl-CoA synthetase long-chain family member 1	-0.853867	8.73324e-29
ENSMUSG00000027332.12	Ivd	isovaleryl coenzyme A dehydrogenase	-0.982339	1.01698e-28
ENSMUSG00000028047.12	Thbs3	thrombospondin 3	1.84559	1.15957e-28
ENSMUSG00000025393.13	Atp5b	ATP synthase, H+ transporting mitochondrial F1 complex, beta subunit	-0.917165	3.11107e-28
ENSMUSG00000003526.13	Prodh	proline dehydrogenase	-1.50293	4.84768e-28
ENSMUSG00000015305.7	Sash1	SAM and SH3 domain containing 1	-1.00726	1.00445e-27
ENSMUSG00000022477.14	Aco2	aconitase 2, mitochondrial	-0.885736	1.40901e-27
ENSMUSG00000027559.6	Car3	carbonic anhydrase 3	-1.92812	1.61157e-27
ENSMUSG00000031740.9	Mmp2	matrix metallopeptidase 2	1.00424	1.80045e-27
ENSMUSG00000012705.17	Retn	resistin	-1.01749	2.10154e-27
ENSMUSG00000060675.14	Plaat3	phospholipase A and acyltransferase 3	-0.901617	2.87368e-27
ENSMUSG00000021792.16	Prxl2a	peroxiredoxin like 2A	-1.09591	3.69288e-27
ENSMUSG00000070327.15	Rnf213	ring finger protein 213	0.998874	3.73653e-27
ENSMUSG00000039405.8	Prss23	protease, serine 23	1.18616	4.46038e-27
ENSMUSG00000027797.16	Dclk1	doublecortin-like kinase 1	1.0354	5.80078e-27
ENSMUSG00000033149.18	Phldb2	pleckstrin homology like domain, family B, member 2	1.39123	6.1961e-27
ENSMUSG00000025792.10	Slc25a10	solute carrier family 25 (mitochondrial carrier, dicarboxylate transporter), member 10	-0.860843	1.36393e-26
ENSMUSG00000079523.9	Tmsb10	thymosin, beta 10	1.15416	1.8392e-26
ENSMUSG00000041688.17	Amot	angiomotin	1.068	2.71342e-26
ENSMUSG00000029998.15	Pcyox1	prenylcysteine oxidase 1	-0.825315	4.73214e-26
ENSMUSG00000020190.14	Mknk2	MAP kinase-interacting serine/threonine kinase 2	-0.82398	8.34812e-26
ENSMUSG00000020422.15	Tns3	tensin 3	0.919865	1.55158e-25
ENSMUSG00000048612.17	Myof	myoferlin	0.916524	1.58054e-25
ENSMUSG00000021238.12	Aldh6a1	aldehyde dehydrogenase family 6, subfamily A1	-1.00308	2.36145e-25
ENSMUSG00000025743.15	Sdc3	syndecan 3	1.17255	3.37537e-25
ENSMUSG00000057137.10	Tmem140	transmembrane protein 140	-1.44184	3.56758e-25
ENSMUSG00000022186.15	Oxct1	3-oxoacid CoA transferase 1	-0.918419	4.19001e-25
ENSMUSG00000040111.18	Gramd1b	GRAM domain containing 1B	-0.855367	4.40154e-25
ENSMUSG00000021748.10	Pdhb	pyruvate dehydrogenase (lipoamide) beta	-0.929299	5.42185e-25
ENSMUSG00000091243.3	Vgll3	vestigial like family member 3	1.20469	9.34727e-25
ENSMUSG00000060376.8	Bckdha	branched chain ketoacid dehydrogenase E1, alpha polypeptide	-1.03878	9.42072e-25
ENSMUSG00000005514.15	Por	cytochrome p450 oxidoreductase	-0.941898	2.73836e-24
ENSMUSG00000029772.18	Ahcyl2	S-adenosylhomocysteine hydrolase-like 2	-1.01481	3.65916e-24
ENSMUSG00000026107.12	Nabp1	nucleic acid binding protein 1	-1.07402	3.70763e-24
ENSMUSG00000018574.15	Acadvl	acyl-Coenzyme A dehydrogenase, very long chain	-0.82582	4.0551e-24
ENSMUSG00000029371.8	Cxcl5	chemokine (C-X-C motif) ligand 5	1.40835	4.0963e-24
ENSMUSG00000030546.15	Plin1	perilipin 1	-0.874111	5.39408e-24
ENSMUSG00000026547.16	Tagln2	transgelin 2	1.10626	6.20206e-24
ENSMUSG00000037916.15	Ndufv1	NADH:ubiquinone oxidoreductase core subunit V1	-0.891194	8.39933e-24
ENSMUSG00000037892.14	Pcdh18	protocadherin 18	1.20072	9.1547e-24
ENSMUSG00000025968.17	Ndufs1	NADH:ubiquinone oxidoreductase core subunit S1	-0.869169	9.36615e-24
ENSMUSG00000020321.17	Mdh1	malate dehydrogenase 1, NAD (soluble)	-0.876426	1.04699e-23
ENSMUSG00000040856.18	Dlk1	delta like non-canonical Notch ligand 1	0.833268	1.11349e-23
ENSMUSG00000039542.17	Ncam1	neural cell adhesion molecule 1	0.944303	1.27153e-23
ENSMUSG00000046743.7	Fat4	FAT atypical cadherin 4	0.951973	1.68948e-23
ENSMUSG00000021876.16	Rnase4	ribonuclease, RNase A family 4	1.06639	2.11632e-23
ENSMUSG00000040690.16	Col16a1	collagen, type XVI, alpha 1	1.10093	2.41436e-23
ENSMUSG00000014329.15	Bicc1	BicC family RNA binding protein 1	1.0605	4.00096e-23
ENSMUSG00000058056.17	Palld	palladin, cytoskeletal associated protein	1.19404	4.36522e-23
ENSMUSG00000037110.21	Ralgapa2	Ral GTPase activating protein, alpha subunit 2 (catalytic)	-1.01993	4.6653e-23
ENSMUSG00000041797.8	Abca9	ATP-binding cassette, sub-family A (ABC1), member 9	1.58218	5.69375e-23
ENSMUSG00000004665.11	Cnn2	calponin 2	1.08774	6.24736e-23
ENSMUSG00000024892.18	Pcx	pyruvate carboxylase	-0.871146	6.49314e-23
ENSMUSG00000020572.9	Nampt	nicotinamide phosphoribosyltransferase	-0.85962	8.83773e-23
ENSMUSG00000048040.9	Arxes2	adipocyte-related X-chromosome expressed sequence 2	-1.03712	9.0361e-23
ENSMUSG00000026853.16	Crat	carnitine acetyltransferase	-0.883886	2.16714e-22
ENSMUSG00000039976.5	Tbc1d16	TBC1 domain family, member 16	-0.965264	2.38448e-22
ENSMUSG00000037656.10	Slc20a2	solute carrier family 20, member 2	-1.01344	4.41658e-22
ENSMUSG00000025791.19	Pgm1	phosphoglucomutase 1	-0.865502	5.17735e-22
ENSMUSG00000020593.17	Lpin1	lipin 1	-0.805518	6.20999e-22
ENSMUSG00000027962.15	Vcam1	vascular cell adhesion molecule 1	0.863177	7.3965e-22
ENSMUSG00000070576.5	Mn1	meningioma 1	1.24763	7.65699e-22
ENSMUSG00000027809.15	Etfdh	electron transferring flavoprotein, dehydrogenase	-0.894404	8.32515e-22
ENSMUSG00000028883.20	Sema3a	sema domain, immunoglobulin domain (Ig), short basic domain, secreted, (semaphorin) 3A	1.00913	9.5245e-22
ENSMUSG00000020777.17	Acox1	acyl-Coenzyme A oxidase 1, palmitoyl	-0.80187	9.5676e-22
ENSMUSG00000020473.14	Aebp1	AE binding protein 1	1.29217	1.07886e-21
ENSMUSG00000023921.10	Mmut	methylmalonyl-Coenzyme A mutase	-0.859345	1.511e-21
ENSMUSG00000035385.6	Ccl2	chemokine (C-C motif) ligand 2	1.16317	1.56039e-21
ENSMUSG00000023942.16	Slc29a1	solute carrier family 29 (nucleoside transporters), member 1	0.863583	1.69727e-21
ENSMUSG00000031722.11	Hp	haptoglobin	-0.861672	1.80736e-21
ENSMUSG00000005360.15	Slc1a3	solute carrier family 1 (glial high affinity glutamate transporter), member 3	-0.847861	2.08442e-21
ENSMUSG00000025465.14	Echs1	enoyl Coenzyme A hydratase, short chain, 1, mitochondrial	-0.877662	2.3601e-21
ENSMUSG00000036606.18	Plxnb2	plexin B2	0.821146	2.72673e-21
ENSMUSG00000022464.15	Slc38a4	solute carrier family 38, member 4	1.53146	3.33279e-21
ENSMUSG00000062908.13	Acadm	acyl-Coenzyme A dehydrogenase, medium chain	-0.811559	4.08098e-21
ENSMUSG00000024978.12	Gpam	glycerol-3-phosphate acyltransferase, mitochondrial	-0.88478	4.15112e-21
ENSMUSG00000031538.7	Plat	plasminogen activator, tissue	1.48448	4.99284e-21
ENSMUSG00000009863.15	Sdhb	succinate dehydrogenase complex, subunit B, iron sulfur (Ip)	-0.929519	5.53635e-21
ENSMUSG00000017144.9	Rnd3	Rho family GTPase 3	1.10698	5.74667e-21
ENSMUSG00000048078.17	Tenm4	teneurin transmembrane protein 4	1.3647	5.77619e-21
ENSMUSG00000047414.7	Flrt2	fibronectin leucine rich transmembrane protein 2	1.17246	7.89615e-21
ENSMUSG00000020256.15	Aldh1l2	aldehyde dehydrogenase 1 family, member L2	1.30793	7.98083e-21
ENSMUSG00000023019.13	Gpd1	glycerol-3-phosphate dehydrogenase 1 (soluble)	-0.878433	1.01228e-20
ENSMUSG00000045954.8	Cavin2	caveolae associated 2	-0.86178	1.10483e-20
ENSMUSG00000002020.16	Ltbp2	latent transforming growth factor beta binding protein 2	1.08268	1.163e-20
ENSMUSG00000020085.16	Aifm2	apoptosis-inducing factor, mitochondrion-associated 2	-0.969294	1.26238e-20
ENSMUSG00000022548.15	Apod	apolipoprotein D	0.988224	1.42887e-20
ENSMUSG00000032279.12	Idh3a	isocitrate dehydrogenase 3 (NAD+) alpha	-0.807342	1.96135e-20
ENSMUSG00000006800.15	Sulf2	sulfatase 2	1.13836	2.29971e-20
ENSMUSG00000033420.13	Antxr1	anthrax toxin receptor 1	0.853286	2.79151e-20
ENSMUSG00000025509.16	Pnpla2	patatin-like phospholipase domain containing 2	-0.829522	3.91366e-20
ENSMUSG00000026494.13	Kif26b	kinesin family member 26B	1.06521	3.9499e-20
ENSMUSG00000068747.15	Sort1	sortilin 1	-0.892102	4.14492e-20
ENSMUSG00000075706.12	Gpx4	glutathione peroxidase 4	-0.818368	6.47111e-20
ENSMUSG00000030246.13	Ldhb	lactate dehydrogenase B	-0.836878	8.54107e-20
ENSMUSG00000029309.8	Sparcl1	SPARC-like 1	-1.06959	8.61745e-20
ENSMUSG00000001020.9	S100a4	S100 calcium binding protein A4	0.848735	1.26799e-19
ENSMUSG00000029581.15	Fscn1	fascin actin-bundling protein 1	0.839091	1.31165e-19
ENSMUSG00000051323.17	Pcdh19	protocadherin 19	1.10533	1.89909e-19
ENSMUSG00000034957.11	Cebpa	CCAAT/enhancer binding protein (C/EBP), alpha	-0.854274	3.13666e-19
ENSMUSG00000044405.5	Adig	adipogenin	-1.07887	3.21263e-19
ENSMUSG00000002265.18	Peg3	paternally expressed 3	0.840366	3.41799e-19
ENSMUSG00000015243.5	Abca1	ATP-binding cassette, sub-family A (ABC1), member 1	-0.829567	3.55895e-19
ENSMUSG00000074934.4	Grem1	gremlin 1, DAN family BMP antagonist	1.96649	3.81168e-19
ENSMUSG00000015474.17	Ppt2	palmitoyl-protein thioesterase 2	-0.84634	3.81495e-19
ENSMUSG00000031373.5	Car5b	carbonic anhydrase 5b, mitochondrial	-0.871959	4.39918e-19
ENSMUSG00000059447.14	Hadhb	hydroxyacyl-CoA dehydrogenase trifunctional multienzyme complex subunit beta	-0.904816	4.41484e-19
ENSMUSG00000020023.19	Tmcc3	transmembrane and coiled coil domains 3	-0.935843	5.21561e-19
ENSMUSG00000024044.20	Epb41l3	erythrocyte membrane protein band 4.1 like 3	0.804264	7.01658e-19
ENSMUSG00000037709.14	Fam13a	family with sequence similarity 13, member A	-0.885191	1.15253e-18
ENSMUSG00000026605.15	Cenpf	centromere protein F	2.28583	1.34884e-18
ENSMUSG00000056758.15	Hmga2	high mobility group AT-hook 2	1.42354	1.5548e-18
ENSMUSG00000029163.10	Emilin1	elastin microfibril interfacer 1	0.904237	1.62323e-18
ENSMUSG00000025492.7	Ifitm3	interferon induced transmembrane protein 3	1.1112	1.70639e-18
ENSMUSG00000044894.15	Uqcrq	ubiquinol-cytochrome c reductase, complex III subunit VII	-0.870398	1.72567e-18
ENSMUSG00000020300.15	Cpeb4	cytoplasmic polyadenylation element binding protein 4	-0.86132	3.41159e-18
ENSMUSG00000054675.6	Tmem119	transmembrane protein 119	1.06887	3.96163e-18
ENSMUSG00000026489.14	Coq8a	coenzyme Q8A	-1.00989	4.30736e-18
ENSMUSG00000028780.14	Sema3c	sema domain, immunoglobulin domain (Ig), short basic domain, secreted, (semaphorin) 3C	0.942218	4.8275e-18
ENSMUSG00000030884.13	Uqcrc2	ubiquinol cytochrome c reductase core protein 2	-0.820538	5.20082e-18
ENSMUSG00000038668.15	Lpar1	lysophosphatidic acid receptor 1	1.02558	6.00672e-18
ENSMUSG00000024664.6	Fads3	fatty acid desaturase 3	-0.803324	6.0767e-18
ENSMUSG00000008136.15	Fhl2	four and a half LIM domains 2	1.41205	7.94477e-18
ENSMUSG00000019326.15	Aoc3	amine oxidase, copper containing 3	-0.97569	8.65244e-18
ENSMUSG00000038400.16	Pmepa1	prostate transmembrane protein, androgen induced 1	1.64741	9.31456e-18
ENSMUSG00000024663.21	Rab3il1	RAB3A interacting protein (rabin3)-like 1	1.08658	1.04096e-17
ENSMUSG00000013483.15	Card14	caspase recruitment domain family, member 14	-1.42292	1.09274e-17
ENSMUSG00000042035.12	Igsf3	immunoglobulin superfamily, member 3	1.08046	1.12791e-17
ENSMUSG00000034459.9	Ifit1	interferon-induced protein with tetratricopeptide repeats 1	2.78423	1.17034e-17
ENSMUSG00000027187.11	Cat	catalase	-0.829523	1.18275e-17
ENSMUSG00000024972.17	Lgals12	lectin, galactose binding, soluble 12	-0.96073	1.49677e-17
ENSMUSG00000029545.14	Acads	acyl-Coenzyme A dehydrogenase, short chain	-0.81058	1.52712e-17
ENSMUSG00000044080.10	S100a1	S100 calcium binding protein A1	-0.962036	1.57686e-17
ENSMUSG00000054676.18	1600014C10Rik	RIKEN cDNA 1600014C10 gene	-0.93117	2.26182e-17
ENSMUSG00000046841.6	Ckap4	cytoskeleton-associated protein 4	0.901464	2.26562e-17
ENSMUSG00000025911.15	Adhfe1	alcohol dehydrogenase, iron containing, 1	-0.978932	2.49423e-17
ENSMUSG00000020044.14	Timp3	tissue inhibitor of metalloproteinase 3	1.90537	2.65669e-17
ENSMUSG00000048490.15	Nrip1	nuclear receptor interacting protein 1	-0.870398	2.70217e-17
ENSMUSG00000031985.10	Gnpat	glyceronephosphate O-acyltransferase	-0.869844	2.74631e-17
ENSMUSG00000039640.8	Mrpl12	mitochondrial ribosomal protein L12	-0.824039	2.79759e-17
ENSMUSG00000031725.9	Ces1f	carboxylesterase 1F	-1.01711	3.00999e-17
ENSMUSG00000052974.9	Cyp2f2	cytochrome P450, family 2, subfamily f, polypeptide 2	-1.24435	3.24507e-17
ENSMUSG00000027709.10	Mccc1	methylcrotonoyl-Coenzyme A carboxylase 1 (alpha)	-0.915208	3.35456e-17
ENSMUSG00000033022.9	Cdo1	cysteine dioxygenase 1, cytosolic	-0.883902	4.42582e-17
ENSMUSG00000021765.10	Fst	follistatin	1.08481	4.57669e-17
ENSMUSG00000009394.14	Syn2	synapsin II	-1.04565	5.81585e-17
ENSMUSG00000017737.3	Mmp9	matrix metallopeptidase 9	1.90573	6.23857e-17
ENSMUSG00000031489.16	Adrb3	adrenergic receptor, beta 3	-1.30851	6.53742e-17
ENSMUSG00000016194.15	Hsd11b1	hydroxysteroid 11-beta dehydrogenase 1	-0.815963	7.90932e-17
ENSMUSG00000036545.10	Adamts2	a disintegrin-like and metallopeptidase (reprolysin type) with thrombospondin type 1 motif, 2	0.849665	8.09295e-17
ENSMUSG00000094777.3	H2ac24	H2A clustered histone 24	1.36851	8.50848e-17
ENSMUSG00000028359.5	Orm3	orosomucoid 3	-1.57259	9.84377e-17
ENSMUSG00000047045.18	Tmem164	transmembrane protein 164	0.870641	1.05801e-16
ENSMUSG00000030257.17	Srgap3	SLIT-ROBO Rho GTPase activating protein 3	1.08191	1.22777e-16
ENSMUSG00000033526.17	Ppip5k1	diphosphoinositol pentakisphosphate kinase 1	-0.867415	1.47478e-16
ENSMUSG00000031875.8	Cmtm3	CKLF-like MARVEL transmembrane domain containing 3	0.882637	1.51864e-16
ENSMUSG00000024043.14	Arhgap28	Rho GTPase activating protein 28	1.08565	1.64303e-16
ENSMUSG00000054728.18	Phactr1	phosphatase and actin regulator 1	2.08448	1.74246e-16
ENSMUSG00000026249.11	Serpine2	serine (or cysteine) peptidase inhibitor, clade E, member 2	0.944393	1.84014e-16
ENSMUSG00000019899.18	Lama2	laminin, alpha 2	1.2279	2.02049e-16
ENSMUSG00000078566.9	Bnip3	BCL2/adenovirus E1B interacting protein 3	-0.807035	2.03804e-16
ENSMUSG00000025488.10	Cox8b	cytochrome c oxidase subunit 8B	-2.14282	2.12949e-16
ENSMUSG00000029207.17	Apbb2	amyloid beta (A4) precursor protein-binding, family B, member 2	0.805683	2.23992e-16
ENSMUSG00000002108.11	Nr1h3	nuclear receptor subfamily 1, group H, member 3	-0.812161	2.24975e-16
ENSMUSG00000022425.17	Enpp2	ectonucleotide pyrophosphatase/phosphodiesterase 2	-0.906556	2.96489e-16
ENSMUSG00000025969.16	Nrp2	neuropilin 2	0.924221	3.15598e-16
ENSMUSG00000045636.17	Mtus1	mitochondrial tumor suppressor 1	-0.856629	3.20689e-16
ENSMUSG00000019539.12	Rcn3	reticulocalbin 3, EF-hand calcium binding domain	0.841351	3.46539e-16
ENSMUSG00000042644.10	Itpr3	inositol 1,4,5-triphosphate receptor 3	1.01831	4.47467e-16
ENSMUSG00000046275.3	Trarg1	trafficking regulator of GLUT4 (SLC2A4) 1	-1.22093	5.10162e-16
ENSMUSG00000061518.12	Cox5b	cytochrome c oxidase subunit 5B	-0.852602	5.64575e-16
ENSMUSG00000074896.4	Ifit3	interferon-induced protein with tetratricopeptide repeats 3	2.16676	6.618e-16
ENSMUSG00000000168.11	Dlat	dihydrolipoamide S-acetyltransferase (E2 component of pyruvate dehydrogenase complex)	-0.868217	6.87054e-16
ENSMUSG00000032702.17	Kank1	KN motif and ankyrin repeat domains 1	-1.01181	7.98181e-16
ENSMUSG00000026827.13	Gpd2	glycerol phosphate dehydrogenase 2, mitochondrial	-1.2371	9.17177e-16
ENSMUSG00000009633.4	G0s2	G0/G1 switch gene 2	-0.9089	9.59581e-16
ENSMUSG00000027774.17	Gfm1	G elongation factor, mitochondrial 1	-0.824614	9.74836e-16
ENSMUSG00000039997.17	Ifi203	interferon activated gene 203	1.23156	1.07201e-15
ENSMUSG00000072946.13	Ptgr2	prostaglandin reductase 2	-0.869393	1.09647e-15
ENSMUSG00000024845.20	Tmem134	transmembrane protein 134	-0.815033	1.13264e-15
ENSMUSG00000050288.7	Fzd2	frizzled class receptor 2	0.899798	1.14694e-15
ENSMUSG00000006369.15	Fbln1	fibulin 1	1.50677	1.36708e-15
ENSMUSG00000042834.16	Nrep	neuronal regeneration related protein	0.840599	1.70674e-15
ENSMUSG00000026825.18	Dnm1	dynamin 1	0.823551	1.98093e-15
ENSMUSG00000038462.4	Uqcrfs1	ubiquinol-cytochrome c reductase, Rieske iron-sulfur polypeptide 1	-0.806117	2.55219e-15
ENSMUSG00000025555.15	Farp1	FERM, RhoGEF (Arhgef) and pleckstrin domain protein 1 (chondrocyte-derived)	1.1583	2.85933e-15
ENSMUSG00000024299.18	Adamts10	a disintegrin-like and metallopeptidase (reprolysin type) with thrombospondin type 1 motif, 10	1.07898	3.17722e-15
ENSMUSG00000006403.14	Adamts4	a disintegrin-like and metallopeptidase (reprolysin type) with thrombospondin type 1 motif, 4	1.18383	3.56537e-15
ENSMUSG00000046169.11	Adamts6	a disintegrin-like and metallopeptidase (reprolysin type) with thrombospondin type 1 motif, 6	1.26359	3.98796e-15
ENSMUSG00000049265.9	Kcnk3	potassium channel, subfamily K, member 3	-1.08059	4.34162e-15
ENSMUSG00000025037.7	Maoa	monoamine oxidase A	-0.956887	4.43753e-15
ENSMUSG00000029778.13	Adcyap1r1	adenylate cyclase activating polypeptide 1 receptor 1	-1.25352	6.60845e-15
ENSMUSG00000023008.19	Fmnl3	formin-like 3	1.15359	6.73903e-15
ENSMUSG00000067780.4	Pi15	peptidase inhibitor 15	0.947633	6.77811e-15
ENSMUSG00000000340.11	Dbt	dihydrolipoamide branched chain transacylase E2	-0.964023	7.34742e-15
ENSMUSG00000022150.17	Dab2	disabled 2, mitogen-responsive phosphoprotein	0.967648	8.9444e-15
ENSMUSG00000034714.10	Ttyh2	tweety family member 2	-0.810143	1.03671e-14
ENSMUSG00000041653.6	Pnpla3	patatin-like phospholipase domain containing 3	-0.948166	1.45533e-14
ENSMUSG00000035828.12	Pim3	proviral integration site 3	-0.815229	1.49653e-14
ENSMUSG00000035373.3	Ccl7	chemokine (C-C motif) ligand 7	1.13553	1.89291e-14
ENSMUSG00000047250.14	Ptgs1	prostaglandin-endoperoxide synthase 1	0.963119	1.97573e-14
ENSMUSG00000028383.18	Hsdl2	hydroxysteroid dehydrogenase like 2	-0.843702	2.28257e-14
ENSMUSG00000076441.10	Ass1	argininosuccinate synthetase 1	1.10416	2.53226e-14
ENSMUSG00000015202.14	Cnksr3	Cnksr family member 3	-0.92123	2.67126e-14
ENSMUSG00000030498.16	Gas2	growth arrest specific 2	1.25416	3.22264e-14
ENSMUSG00000050860.7	Phospho1	phosphatase, orphan 1	-1.58386	3.36954e-14
ENSMUSG00000044258.11	Ctla2a	cytotoxic T lymphocyte-associated protein 2 alpha	1.33546	3.84643e-14
ENSMUSG00000027087.12	Itgav	integrin alpha V	0.853865	3.89894e-14
ENSMUSG00000043099.5	Hic1	hypermethylated in cancer 1	1.48453	4.43369e-14
ENSMUSG00000025732.7	Mcrip2	MAPK regulated corepressor interacting protein 2	-1.07028	4.62395e-14
ENSMUSG00000019528.19	Gyg	glycogenin	-0.916636	5.14521e-14
ENSMUSG00000046318.17	Ccbe1	collagen and calcium binding EGF domains 1	1.27239	7.12183e-14
ENSMUSG00000076435.4	Acsf2	acyl-CoA synthetase family member 2	-0.873851	7.60136e-14
ENSMUSG00000024063.14	Lbh	limb-bud and heart	0.810083	8.8434e-14
ENSMUSG00000030218.3	Mgp	matrix Gla protein	1.638	9.45983e-14
ENSMUSG00000030986.14	Dhx32	DEAH (Asp-Glu-Ala-His) box polypeptide 32	-0.937516	9.66272e-14
ENSMUSG00000033350.8	Chst2	carbohydrate sulfotransferase 2	1.04857	1.06209e-13
ENSMUSG00000032348.7	Gsta4	glutathione S-transferase, alpha 4	-0.859944	1.18632e-13
ENSMUSG00000025212.18	Sfxn3	sideroflexin 3	0.87435	1.2233e-13
ENSMUSG00000019817.19	Plagl1	pleiomorphic adenoma gene-like 1	2.34933	1.22519e-13
ENSMUSG00000021559.15	Dapk1	death associated protein kinase 1	-0.844023	1.25834e-13
ENSMUSG00000018566.15	Slc2a4	solute carrier family 2 (facilitated glucose transporter), member 4	-1.03832	1.26323e-13
ENSMUSG00000030711.17	Sult1a1	sulfotransferase family 1A, phenol-preferring, member 1	-0.834167	1.27354e-13
ENSMUSG00000069273.3	H3c6	H3 clustered histone 6	1.09728	1.27532e-13
ENSMUSG00000032715.10	Trib3	tribbles pseudokinase 3	-0.917801	1.29274e-13
ENSMUSG00000027230.10	Creb3l1	cAMP responsive element binding protein 3-like 1	1.08076	1.36269e-13
ENSMUSG00000047735.15	Samd9l	sterile alpha motif domain containing 9-like	0.816561	1.41824e-13
ENSMUSG00000069267.3	H3c2	H3 clustered histone 2	1.4515	1.82999e-13
ENSMUSG00000009281.7	Rarres2	retinoic acid receptor responder (tazarotene induced) 2	-0.996773	1.94608e-13
ENSMUSG00000052957.9	Gas1	growth arrest specific 1	0.815301	2.09513e-13
ENSMUSG00000031778.14	Cx3cl1	chemokine (C-X3-C motif) ligand 1	1.11363	2.20764e-13
ENSMUSG00000039883.6	Lrrc17	leucine rich repeat containing 17	0.84329	2.42269e-13
ENSMUSG00000002602.17	Axl	AXL receptor tyrosine kinase	0.845893	2.59031e-13
ENSMUSG00000029108.15	Pcdh7	protocadherin 7	1.06807	2.81645e-13
ENSMUSG00000043079.18	Synpo	synaptopodin	1.18911	3.11692e-13
ENSMUSG00000005803.15	Sqor	sulfide quinone oxidoreductase	-0.88399	4.09807e-13
ENSMUSG00000035914.12	Cd276	CD276 antigen	1.11376	4.18919e-13
ENSMUSG00000012017.5	Scarf2	scavenger receptor class F, member 2	0.975397	4.41525e-13
ENSMUSG00000028583.15	Pdpn	podoplanin	1.39834	4.81668e-13
ENSMUSG00000034488.15	Edil3	EGF-like repeats and discoidin I-like domains 3	1.09651	5.23528e-13
ENSMUSG00000027208.15	Fgf7	fibroblast growth factor 7	1.14971	5.52593e-13
ENSMUSG00000035299.17	Mid1	midline 1	1.11359	6.50875e-13
ENSMUSG00000022947.9	Cbr3	carbonyl reductase 3	-0.813235	6.51785e-13
ENSMUSG00000056481.8	Cd248	CD248 antigen, endosialin	0.823439	6.6491e-13
ENSMUSG00000007480.6	Mc5r	melanocortin 5 receptor	-1.06948	6.84382e-13
ENSMUSG00000051048.18	P4ha3	procollagen-proline, 2-oxoglutarate 4-dioxygenase (proline 4-hydroxylase), alpha polypeptide III	2.07412	7.43093e-13
ENSMUSG00000025085.17	Ablim1	actin-binding LIM protein 1	1.08966	7.58281e-13
ENSMUSG00000028300.15	C9orf72	C9orf72, member of C9orf72-SMCR8 complex	-0.816001	8.31605e-13
ENSMUSG00000056870.10	Gulp1	GULP, engulfment adaptor PTB domain containing 1	0.853281	8.33768e-13
ENSMUSG00000041559.8	Fmod	fibromodulin	2.45602	9.32235e-13
ENSMUSG00000028607.17	Cpt2	carnitine palmitoyltransferase 2	-0.816566	9.59181e-13
ENSMUSG00000033952.15	Aspm	abnormal spindle microtubule assembly	1.84367	1.18011e-12
ENSMUSG00000044986.11	Tst	thiosulfate sulfurtransferase, mitochondrial	-0.841477	1.20497e-12
ENSMUSG00000020160.19	Meis1	Meis homeobox 1	0.860682	1.27615e-12
ENSMUSG00000061751.17	Kalrn	kalirin, RhoGEF kinase	0.903275	1.27943e-12
ENSMUSG00000022508.6	Bcl6	B cell leukemia/lymphoma 6	-0.891267	1.29702e-12
ENSMUSG00000051483.10	Cbr1	carbonyl reductase 1	-0.860804	1.44059e-12
ENSMUSG00000080316.12	Spaca6	sperm acrosome associated 6	1.07079	2.03162e-12
ENSMUSG00000027210.21	Meis2	Meis homeobox 2	0.814979	2.76859e-12
ENSMUSG00000030087.12	Klf15	Kruppel-like factor 15	-0.869173	3.1799e-12
ENSMUSG00000034675.18	Dbn1	drebrin 1	1.02385	3.26363e-12
ENSMUSG00000008398.17	Elk3	ELK3, member of ETS oncogene family	1.23777	4.90291e-12
ENSMUSG00000067455.6	H4c11	H4 clustered histone 11	1.59032	4.95659e-12
ENSMUSG00000005958.16	Ephb3	Eph receptor B3	0.877169	5.63675e-12
ENSMUSG00000042569.14	Dhrs7b	dehydrogenase/reductase (SDR family) member 7B	-0.871817	6.29371e-12
ENSMUSG00000015222.19	Map2	microtubule-associated protein 2	1.08711	7.79346e-12
ENSMUSG00000027068.7	Dhrs9	dehydrogenase/reductase (SDR family) member 9	-0.80922	8.88568e-12
ENSMUSG00000001755.13	Coasy	Coenzyme A synthase	-0.802849	9.00029e-12
ENSMUSG00000032812.19	Arap1	ArfGAP with RhoGAP domain, ankyrin repeat and PH domain 1	0.852533	1.00384e-11
ENSMUSG00000021831.10	Ero1a	endoplasmic reticulum oxidoreductase 1 alpha	-0.904633	1.2285e-11
ENSMUSG00000028124.16	Gclm	glutamate-cysteine ligase, modifier subunit	-0.828548	1.24152e-11
ENSMUSG00000035258.16	Abi3bp	ABI family member 3 binding protein	1.10575	1.24618e-11
ENSMUSG00000086784.3	Isoc2a	isochorismatase domain containing 2a	-0.835522	1.30082e-11
ENSMUSG00000038068.16	Rnf144b	ring finger protein 144B	-1.29117	1.34199e-11
ENSMUSG00000024842.9	Cabp4	calcium binding protein 4	-1.61074	1.53733e-11
ENSMUSG00000023905.16	Tnfrsf12a	tumor necrosis factor receptor superfamily, member 12a	-1.0148	1.63452e-11
ENSMUSG00000000693.11	Loxl3	lysyl oxidase-like 3	0.918639	1.71579e-11
ENSMUSG00000030203.18	Dusp16	dual specificity phosphatase 16	-0.947705	1.71586e-11
ENSMUSG00000000440.13	Pparg	peroxisome proliferator activated receptor gamma	-0.842142	1.77312e-11
ENSMUSG00000020099.9	Unc5b	unc-5 netrin receptor B	0.860512	1.87325e-11
ENSMUSG00000029380.12	Cxcl1	chemokine (C-X-C motif) ligand 1	1.02625	1.91487e-11
ENSMUSG00000014303.14	Glis2	GLIS family zinc finger 2	0.920803	1.93093e-11
ENSMUSG00000025348.10	Itga7	integrin alpha 7	-1.16424	1.93216e-11
ENSMUSG00000071856.11	Mcc	mutated in colorectal cancers	0.804838	2.00967e-11
ENSMUSG00000058070.15	Eml1	echinoderm microtubule associated protein like 1	0.802363	2.08984e-11
ENSMUSG00000056938.17	Acbd4	acyl-Coenzyme A binding domain containing 4	-0.868734	2.73046e-11
ENSMUSG00000025545.11	Clybl	citrate lyase beta like	-0.889735	2.87326e-11
ENSMUSG00000030314.17	Atg7	autophagy related 7	-0.801573	3.01487e-11
ENSMUSG00000047945.7	Marcksl1	MARCKS-like 1	1.08728	3.02561e-11
ENSMUSG00000040084.10	Bub1b	BUB1B, mitotic checkpoint serine/threonine kinase	1.92438	3.02831e-11
ENSMUSG00000069300.4	H2bc11	H2B clustered histone 11	1.53686	3.21994e-11
ENSMUSG00000028111.5	Ctsk	cathepsin K	0.991511	3.40114e-11
ENSMUSG00000069301.6	H2ac11	H2A clustered histone 11	1.36168	3.79708e-11
ENSMUSG00000101355.2	H3c10	H3 clustered histone 10	1.34318	3.82838e-11
ENSMUSG00000029322.13	Plac8	placenta-specific 8	0.942085	3.83324e-11
ENSMUSG00000058773.3	H1f5	H1.5 linker histone, cluster member	1.76738	3.93275e-11
ENSMUSG00000039196.3	Orm1	orosomucoid 1	-0.825402	4.14239e-11
ENSMUSG00000074480.5	Mex3a	mex3 RNA binding family member A	1.0425	4.29004e-11
ENSMUSG00000046056.16	Sbsn	suprabasin	-1.15692	4.79379e-11
ENSMUSG00000030717.10	Nupr1	nuclear protein transcription regulator 1	-0.903979	4.9829e-11
ENSMUSG00000030869.12	Ndufab1	NADH:ubiquinone oxidoreductase subunit AB1	-0.892984	5.0393e-11
ENSMUSG00000002325.16	Irf9	interferon regulatory factor 9	1.37945	5.84417e-11
ENSMUSG00000026576.13	Atp1b1	ATPase, Na+/K+ transporting, beta 1 polypeptide	1.26039	5.89579e-11
ENSMUSG00000020914.18	Top2a	topoisomerase (DNA) II alpha	1.17379	6.47671e-11
ENSMUSG00000022090.11	Pdlim2	PDZ and LIM domain 2	0.982356	6.63973e-11
ENSMUSG00000075702.11	Selenom	selenoprotein M	1.11864	8.33905e-11
ENSMUSG00000074403.3	H3c13	H3 clustered histone 13	1.19578	9.49825e-11
ENSMUSG00000046718.9	Bst2	bone marrow stromal cell antigen 2	1.06958	9.76812e-11
ENSMUSG00000066621.13	Tecpr1	tectonin beta-propeller repeat containing 1	-0.878209	1.10665e-10
ENSMUSG00000066026.15	Dhrs3	dehydrogenase/reductase (SDR family) member 3	-0.944225	1.22556e-10
ENSMUSG00000050578.11	Mmp13	matrix metallopeptidase 13	1.94921	1.27751e-10
ENSMUSG00000060093.7	H4c1	H4 clustered histone 1	1.11747	1.40269e-10
ENSMUSG00000003352.15	Cacnb3	calcium channel, voltage-dependent, beta 3 subunit	0.930704	1.47679e-10
ENSMUSG00000021922.18	Itih4	inter alpha-trypsin inhibitor, heavy chain 4	-1.22337	1.50098e-10
ENSMUSG00000045763.9	Basp1	brain abundant, membrane attached signal protein 1	0.825619	1.64167e-10
ENSMUSG00000030782.18	Tgfb1i1	transforming growth factor beta 1 induced transcript 1	1.08128	1.9103e-10
ENSMUSG00000025255.19	Zfhx4	zinc finger homeodomain 4	0.809087	1.9162e-10
ENSMUSG00000001131.12	Timp1	tissue inhibitor of metalloproteinase 1	1.19988	2.06382e-10
ENSMUSG00000025150.11	Cbr2	carbonyl reductase 2	-0.854842	2.07765e-10
ENSMUSG00000026535.10	Ifi202b	interferon activated gene 202B	0.985743	2.78423e-10
ENSMUSG00000034422.15	Parp14	poly (ADP-ribose) polymerase family, member 14	1.04625	3.40752e-10
ENSMUSG00000062991.10	Nrg1	neuregulin 1	0.844757	3.52786e-10
ENSMUSG00000040033.17	Stat2	signal transducer and activator of transcription 2	0.839603	3.60239e-10
ENSMUSG00000024247.15	Pkdcc	protein kinase domain containing, cytoplasmic	-0.823887	3.62703e-10
ENSMUSG00000114279.2	H2bc14	H2B clustered histone 14	1.82592	4.3292e-10
ENSMUSG00000031099.17	Smarca1	SWI/SNF related, matrix associated, actin dependent regulator of chromatin, subfamily a, member 1	1.08148	4.51834e-10
ENSMUSG00000032258.16	Lca5	Leber congenital amaurosis 5 (human)	1.97632	5.78733e-10
ENSMUSG00000057751.15	Megf6	multiple EGF-like-domains 6	1.78359	5.87228e-10
ENSMUSG00000020536.13	Llgl1	LLGL1 scribble cell polarity complex component	0.855389	6.08374e-10
ENSMUSG00000039629.15	Strip2	striatin interacting protein 2	-0.995703	6.92492e-10
ENSMUSG00000005268.21	Prlr	prolactin receptor	-1.10049	7.01439e-10
ENSMUSG00000093769.5	H3c14	H3 clustered histone 14	9.30265	9.8436e-10
ENSMUSG00000031558.16	Slit2	slit guidance ligand 2	0.954289	1.14299e-09
ENSMUSG00000030921.18	Trim30a	tripartite motif-containing 30A	1.29178	1.22123e-09
ENSMUSG00000033871.15	Ppargc1b	peroxisome proliferative activated receptor, gamma, coactivator 1 beta	-1.15192	1.33382e-09
ENSMUSG00000030796.18	Tead2	TEA domain family member 2	0.960725	1.39177e-09
ENSMUSG00000006586.16	Runx1t1	RUNX1 translocation partner 1	0.830696	1.67565e-09
ENSMUSG00000035274.14	Tpbg	trophoblast glycoprotein	1.26505	1.70857e-09
ENSMUSG00000033576.13	Apol6	apolipoprotein L 6	-0.978244	1.88882e-09
ENSMUSG00000035390.17	Brsk1	BR serine/threonine kinase 1	1.8867	1.99448e-09
ENSMUSG00000045932.13	Ifit2	interferon-induced protein with tetratricopeptide repeats 2	1.47014	2.06819e-09
ENSMUSG00000027883.16	Gpsm2	G-protein signalling modulator 2 (AGS3-like, C. elegans)	1.06301	2.51942e-09
ENSMUSG00000021102.5	Glrx5	glutaredoxin 5	-0.856809	2.85022e-09
ENSMUSG00000020105.10	Lrig3	leucine-rich repeats and immunoglobulin-like domains 3	0.800926	3.13157e-09
ENSMUSG00000006219.13	Fblim1	filamin binding LIM protein 1	1.80749	3.45187e-09
ENSMUSG00000040260.9	Daam2	dishevelled associated activator of morphogenesis 2	1.095	3.70453e-09
ENSMUSG00000059493.14	Nhs	NHS actin remodeling regulator	0.950335	3.70829e-09
ENSMUSG00000013367.6	Iglon5	IgLON family member 5	1.59831	3.89403e-09
ENSMUSG00000075031.5	H2bc3	H2B clustered histone 3	1.64596	3.94062e-09
ENSMUSG00000001473.8	Tubb6	tubulin, beta 6 class V	0.968462	4.72831e-09
ENSMUSG00000021318.16	Gli3	GLI-Kruppel family member GLI3	0.903282	4.92493e-09
ENSMUSG00000027901.13	Dennd2d	DENN/MADD domain containing 2D	-1.10033	5.23407e-09
ENSMUSG00000017057.10	Il13ra1	interleukin 13 receptor, alpha 1	1.48202	5.48647e-09
ENSMUSG00000043895.7	S1pr2	sphingosine-1-phosphate receptor 2	0.816013	5.80924e-09
ENSMUSG00000020439.18	Smtn	smoothelin	0.86565	6.00667e-09
ENSMUSG00000023947.9	Nfkbie	nuclear factor of kappa light polypeptide gene enhancer in B cells inhibitor, epsilon	1.37894	6.74678e-09
ENSMUSG00000068122.11	Agtr2	angiotensin II receptor, type 2	1.55982	6.75492e-09
ENSMUSG00000021253.8	Tgfb3	transforming growth factor, beta 3	0.845976	6.78291e-09
ENSMUSG00000061615.3	H2ac4	H2A clustered histone 4	1.68762	6.8324e-09
ENSMUSG00000074064.7	Mlycd	malonyl-CoA decarboxylase	-0.842468	6.88649e-09
ENSMUSG00000028247.3	Coq3	coenzyme Q3 methyltransferase	-0.875943	7.44179e-09
ENSMUSG00000026725.18	Tnn	tenascin N	2.11004	7.64236e-09
ENSMUSG00000035186.7	Ubd	ubiquitin D	-0.878743	8.69307e-09
ENSMUSG00000018927.4	Ccl6	chemokine (C-C motif) ligand 6	-1.79168	9.58595e-09
ENSMUSG00000020183.12	Cpm	carboxypeptidase M	-0.981263	9.79666e-09
ENSMUSG00000025202.9	Scd3	stearoyl-coenzyme A desaturase 3	-1.26179	9.91329e-09
ENSMUSG00000025104.14	Hdgfl3	HDGF like 3	0.820148	1.03968e-08
ENSMUSG00000022707.17	Gbe1	glucan (1,4-alpha-), branching enzyme 1	-0.851164	1.08609e-08
ENSMUSG00000026628.14	Atf3	activating transcription factor 3	-1.98383	1.10803e-08
ENSMUSG00000028037.14	Ifi44	interferon-induced protein 44	3.26648	1.14697e-08
ENSMUSG00000046186.9	Cd109	CD109 antigen	0.910262	1.18759e-08
ENSMUSG00000019082.19	Slc25a22	solute carrier family 25 (mitochondrial carrier, glutamate), member 22	-0.930557	1.1881e-08
ENSMUSG00000022013.5	Dnajc15	DnaJ heat shock protein family (Hsp40) member C15	-0.86587	1.18993e-08
ENSMUSG00000040488.19	Ltbp4	latent transforming growth factor beta binding protein 4	0.925714	1.20207e-08
ENSMUSG00000021665.10	Hexb	hexosaminidase B	0.833723	1.22099e-08
ENSMUSG00000042515.14	Pwwp3b	PWWP domain containing 3B	1.33189	1.29308e-08
ENSMUSG00000030268.18	Bcat1	branched chain aminotransferase 1, cytosolic	1.55067	1.30389e-08
ENSMUSG00000025089.16	Gfra1	glial cell line derived neurotrophic factor family receptor alpha 1	1.5703	1.65032e-08
ENSMUSG00000018830.11	Myh11	myosin, heavy polypeptide 11, smooth muscle	-1.23845	2.12181e-08
ENSMUSG00000047181.13	Samd14	sterile alpha motif domain containing 14	0.989878	2.20885e-08
ENSMUSG00000026069.16	Il1rl1	interleukin 1 receptor-like 1	2.46712	2.23268e-08
ENSMUSG00000032220.11	Myo1e	myosin IE	1.14944	2.2557e-08
ENSMUSG00000028150.15	Rorc	RAR-related orphan receptor gamma	-1.25718	2.47114e-08
ENSMUSG00000041324.15	Inhba	inhibin beta-A	1.32313	2.7539e-08
ENSMUSG00000035504.17	Reep6	receptor accessory protein 6	-0.891897	2.87323e-08
ENSMUSG00000018507.17	Trpv2	transient receptor potential cation channel, subfamily V, member 2	-1.89202	3.11064e-08
ENSMUSG00000105827.2	H2bc18	H2B clustered histone 18	1.21643	3.37003e-08
ENSMUSG00000043687.17	1190005I06Rik	RIKEN cDNA 1190005I06 gene	-1.44375	3.39327e-08
ENSMUSG00000021003.11	Galc	galactosylceramidase	-0.909521	3.73447e-08
ENSMUSG00000071064.16	Zfp827	zinc finger protein 827	0.815135	3.96101e-08
ENSMUSG00000040061.18	Plcb2	phospholipase C, beta 2	-0.924474	3.98676e-08
ENSMUSG00000035305.6	Ror1	receptor tyrosine kinase-like orphan receptor 1	1.08283	4.20079e-08
ENSMUSG00000048402.15	Gli2	GLI-Kruppel family member GLI2	1.13016	4.28468e-08
ENSMUSG00000058571.12	Gpc6	glypican 6	0.953275	4.38443e-08
ENSMUSG00000033207.8	Mamdc2	MAM domain containing 2	1.23524	4.43936e-08
ENSMUSG00000006576.17	Slc4a3	solute carrier family 4 (anion exchanger), member 3	0.894206	4.5105e-08
ENSMUSG00000048327.7	Ckap2l	cytoskeleton associated protein 2-like	1.76432	4.73477e-08
ENSMUSG00000026365.16	Cfh	complement component factor h	1.24078	4.73708e-08
ENSMUSG00000061540.4	Orm2	orosomucoid 2	-0.905309	4.82585e-08
ENSMUSG00000040836.16	Gpr161	G protein-coupled receptor 161	1.09777	5.07859e-08
ENSMUSG00000079588.4	Tmem182	transmembrane protein 182	-0.930795	5.71763e-08
ENSMUSG00000026278.15	Bok	BCL2-related ovarian killer	-1.00874	6.38389e-08
ENSMUSG00000021751.14	Acox2	acyl-Coenzyme A oxidase 2, branched chain	-1.78582	6.86381e-08
ENSMUSG00000033107.7	Rnf125	ring finger protein 125	-0.887047	7.43319e-08
ENSMUSG00000061533.17	Cep128	centrosomal protein 128	1.27862	7.46882e-08
ENSMUSG00000005410.7	Mcm5	minichromosome maintenance complex component 5	1.22893	7.48172e-08
ENSMUSG00000028268.15	Gbp3	guanylate binding protein 3	1.48447	7.94524e-08
ENSMUSG00000025867.9	Cplx2	complexin 2	0.856185	8.18367e-08
ENSMUSG00000022952.18	Runx1	runt related transcription factor 1	1.45796	8.58136e-08
ENSMUSG00000039116.8	Adgrg6	adhesion G protein-coupled receptor G6	1.57812	8.804e-08
ENSMUSG00000021725.10	Parp8	poly (ADP-ribose) polymerase family, member 8	0.973665	9.61884e-08
ENSMUSG00000029815.13	Malsu1	mitochondrial assembly of ribosomal large subunit 1	-0.961621	1.07884e-07
ENSMUSG00000029861.18	Fam131b	family with sequence similarity 131, member B	1.18842	1.14816e-07
ENSMUSG00000031520.7	Vegfc	vascular endothelial growth factor C	1.06534	1.19484e-07
ENSMUSG00000005951.14	Shpk	sedoheptulokinase	-0.931271	1.19582e-07
ENSMUSG00000074971.5	Fibin	fin bud initiation factor homolog (zebrafish)	1.72278	1.21599e-07
ENSMUSG00000051314.12	Ffar2	free fatty acid receptor 2	-0.875514	1.24106e-07
ENSMUSG00000033033.11	Calhm2	calcium homeostasis modulator family member 2	1.09167	1.25727e-07
ENSMUSG00000027715.10	Ccna2	cyclin A2	1.44433	1.2591e-07
ENSMUSG00000027469.17	Tpx2	TPX2, microtubule-associated	1.06058	1.29515e-07
ENSMUSG00000004952.14	Rasa4	RAS p21 protein activator 4	0.861576	1.33295e-07
ENSMUSG00000027326.14	Knl1	kinetochore scaffold 1	1.58192	1.3545e-07
ENSMUSG00000036356.16	Csgalnact1	chondroitin sulfate N-acetylgalactosaminyltransferase 1	0.906013	1.36769e-07
ENSMUSG00000025762.17	Larp1b	La ribonucleoprotein 1B	-0.951535	1.38949e-07
ENSMUSG00000038112.16	AW551984	expressed sequence AW551984	1.72859	1.46775e-07
ENSMUSG00000026709.11	Dars2	aspartyl-tRNA synthetase 2 (mitochondrial)	-0.80318	1.48058e-07
ENSMUSG00000037568.13	Vash2	vasohibin 2	1.26775	1.48371e-07
ENSMUSG00000010830.9	Kdelr3	KDEL (Lys-Asp-Glu-Leu) endoplasmic reticulum protein retention receptor 3	0.838948	1.49767e-07
ENSMUSG00000044807.14	Zfp354c	zinc finger protein 354C	1.15226	1.59972e-07
ENSMUSG00000001228.15	Uhrf1	ubiquitin-like, containing PHD and RING finger domains, 1	1.20212	1.64545e-07
ENSMUSG00000062488.10	Ifit3b	interferon-induced protein with tetratricopeptide repeats 3B	1.77404	1.72948e-07
ENSMUSG00000097328.8	Tnfsf12	tumor necrosis factor (ligand) superfamily, member 12	1.12215	1.73905e-07
ENSMUSG00000041482.18	Piezo2	piezo-type mechanosensitive ion channel component 2	2.07478	1.79465e-07
ENSMUSG00000044968.17	Napepld	N-acyl phosphatidylethanolamine phospholipase D	-0.92948	1.80663e-07
ENSMUSG00000031290.15	Lrch2	leucine-rich repeats and calponin homology (CH) domain containing 2	1.0836	1.83936e-07
ENSMUSG00000069302.6	H2ac12	H2A clustered histone 12	1.38023	2.10171e-07
ENSMUSG00000063415.13	Cyp26b1	cytochrome P450, family 26, subfamily b, polypeptide 1	1.27246	2.29161e-07
ENSMUSG00000029499.12	Pxmp2	peroxisomal membrane protein 2	-0.969698	2.36779e-07
ENSMUSG00000027656.8	Ccn5	cellular communication network factor 5	1.04697	2.49181e-07
ENSMUSG00000027859.11	Ngf	nerve growth factor	2.50273	2.70791e-07
ENSMUSG00000019590.17	Cyb561	cytochrome b-561	-1.27433	2.92085e-07
ENSMUSG00000051375.16	Pcdh1	protocadherin 1	-0.878532	2.98881e-07
ENSMUSG00000068855.4	H2ac20	H2A clustered histone 20	1.13597	2.99025e-07
ENSMUSG00000041112.18	Elmo1	engulfment and cell motility 1	1.95783	3.20338e-07
ENSMUSG00000032363.16	Adamts7	a disintegrin-like and metallopeptidase (reprolysin type) with thrombospondin type 1 motif, 7	1.01703	3.26845e-07
ENSMUSG00000029552.20	Tes	testin LIM domain protein	1.3079	3.79968e-07
ENSMUSG00000025993.11	Slc40a1	solute carrier family 40 (iron-regulated transporter), member 1	1.20256	3.83668e-07
ENSMUSG00000021750.17	Fam107a	family with sequence similarity 107, member A	-1.35892	3.89967e-07
ENSMUSG00000036913.16	Trim67	tripartite motif-containing 67	-1.22997	3.92615e-07
ENSMUSG00000012443.5	Kif11	kinesin family member 11	1.41093	4.04307e-07
ENSMUSG00000026027.14	Stradb	STE20-related kinase adaptor beta	-0.952149	4.1234e-07
ENSMUSG00000029561.18	Oasl2	2'-5' oligoadenylate synthetase-like 2	3.40046	4.13616e-07
ENSMUSG00000033192.6	Lpcat2	lysophosphatidylcholine acyltransferase 2	1.22463	4.18332e-07
ENSMUSG00000050931.8	Sgms2	sphingomyelin synthase 2	-0.889282	4.1896e-07
ENSMUSG00000026566.16	Mpzl1	myelin protein zero-like 1	0.803168	4.29135e-07
ENSMUSG00000079014.5	Serpina3i	serine (or cysteine) peptidase inhibitor, clade A, member 3I	1.45314	4.33347e-07
ENSMUSG00000036334.13	Igsf10	immunoglobulin superfamily, member 10	1.07192	4.36743e-07
ENSMUSG00000028464.17	Tpm2	tropomyosin 2, beta	1.19061	4.85813e-07
ENSMUSG00000025815.14	Dhtkd1	dehydrogenase E1 and transketolase domain containing 1	-0.913899	4.91421e-07
ENSMUSG00000040564.15	Apoc1	apolipoprotein C-I	-0.832883	5.0642e-07
ENSMUSG00000023015.15	Racgap1	Rac GTPase-activating protein 1	0.899825	6.00483e-07
ENSMUSG00000069310.5	H3c3	H3 clustered histone 3	1.91129	6.27301e-07
ENSMUSG00000041132.12	N4bp2l1	NEDD4 binding protein 2-like 1	-1.02351	7.41641e-07
ENSMUSG00000041957.16	Pkp2	plakophilin 2	-0.999283	8.10106e-07
ENSMUSG00000035279.9	Ssc5d	scavenger receptor cysteine rich family, 5 domains	0.890491	8.15912e-07
ENSMUSG00000041220.11	Elovl6	ELOVL family member 6, elongation of long chain fatty acids (yeast)	0.890142	8.29123e-07
ENSMUSG00000069266.6	H4c2	H4 clustered histone 2	1.07126	8.2922e-07
ENSMUSG00000019122.9	Ccl9	chemokine (C-C motif) ligand 9	-1.12074	8.53452e-07
ENSMUSG00000020963.16	Tshr	thyroid stimulating hormone receptor	-1.09166	8.87713e-07
ENSMUSG00000019864.15	Rtn4ip1	reticulon 4 interacting protein 1	-0.949846	9.70334e-07
ENSMUSG00000024691.14	Fam111a	family with sequence similarity 111, member A	0.916441	9.72349e-07
ENSMUSG00000028541.15	B4galt2	UDP-Gal:betaGlcNAc beta 1,4- galactosyltransferase, polypeptide 2	0.874991	1.01361e-06
ENSMUSG00000040483.16	Xaf1	XIAP associated factor 1	1.61519	1.08037e-06
ENSMUSG00000042254.15	Cilp	cartilage intermediate layer protein, nucleotide pyrophosphohydrolase	4.85144	1.08869e-06
ENSMUSG00000055632.19	Hmcn2	hemicentin 2	3.6747	1.17175e-06
ENSMUSG00000021404.13	Serpinb9c	serine (or cysteine) peptidase inhibitor, clade B, member 9c	-3.3941	1.20652e-06
ENSMUSG00000049907.9	Rasl11b	RAS-like, family 11, member B	0.949381	1.25603e-06
ENSMUSG00000101972.2	H3c11	H3 clustered histone 11	1.11705	1.30221e-06
ENSMUSG00000095217.2	H2bc15	H2B clustered histone 15	1.92802	1.31077e-06
ENSMUSG00000018819.11	Lsp1	lymphocyte specific 1	0.985355	1.41602e-06
ENSMUSG00000056174.9	Col8a2	collagen, type VIII, alpha 2	5.22233	1.50244e-06
ENSMUSG00000060487.8	Samd5	sterile alpha motif domain containing 5	1.31968	1.50958e-06
ENSMUSG00000038296.15	Galnt18	polypeptide N-acetylgalactosaminyltransferase 18	0.816704	1.55801e-06
ENSMUSG00000022330.6	Osr2	odd-skipped related 2	1.02931	1.62897e-06
ENSMUSG00000052727.7	Map1b	microtubule-associated protein 1B	0.859263	1.72863e-06
ENSMUSG00000029843.5	Slc13a4	solute carrier family 13 (sodium/sulfate symporters), member 4	-0.872954	1.7365e-06
ENSMUSG00000024883.9	Rin1	Ras and Rab interactor 1	1.29426	1.75227e-06
ENSMUSG00000078302.6	Foxd1	forkhead box D1	1.2949	1.78095e-06
ENSMUSG00000039485.9	Tspyl4	TSPY-like 4	1.18904	1.90679e-06
ENSMUSG00000051242.2	Pcdhb9	protocadherin beta 9	1.17386	1.95724e-06
ENSMUSG00000058022.15	Adtrp	androgen dependent TFPI regulating protein	-1.05079	1.96179e-06
ENSMUSG00000029484.13	Anxa3	annexin A3	1.07911	1.98885e-06
ENSMUSG00000025185.15	Loxl4	lysyl oxidase-like 4	0.878859	2.13907e-06
ENSMUSG00000006398.16	Cdc20	cell division cycle 20	1.40953	2.23306e-06
ENSMUSG00000069171.15	Nr2f1	nuclear receptor subfamily 2, group F, member 1	0.912336	2.35136e-06
ENSMUSG00000064288.5	H4c12	H4 clustered histone 12	1.19392	2.43809e-06
ENSMUSG00000025932.15	Eya1	EYA transcriptional coactivator and phosphatase 1	0.800671	2.68158e-06
ENSMUSG00000017830.16	Dhx58	DEXH (Asp-Glu-X-His) box polypeptide 58	1.78291	2.68528e-06
ENSMUSG00000069272.7	H2ac8	H2A clustered histone 8	1.25572	2.75267e-06
ENSMUSG00000031557.17	Plekha2	pleckstrin homology domain-containing, family A (phosphoinositide binding specific) member 2	0.871113	2.85045e-06
ENSMUSG00000043441.6	Gpr149	G protein-coupled receptor 149	1.39211	2.99799e-06
ENSMUSG00000069308.8	H2bc22	H2B clustered histone 22	1.67191	3.06419e-06
ENSMUSG00000057143.16	Trim12c	tripartite motif-containing 12C	0.800869	3.09287e-06
ENSMUSG00000032010.16	Usp2	ubiquitin specific peptidase 2	-0.951824	3.09582e-06
ENSMUSG00000056394.20	Lig1	ligase I, DNA, ATP-dependent	1.01544	3.33948e-06
ENSMUSG00000018995.13	Nars2	asparaginyl-tRNA synthetase 2 (mitochondrial)(putative)	-0.898776	3.4064e-06
ENSMUSG00000007783.11	Cpt1c	carnitine palmitoyltransferase 1c	0.990945	3.52295e-06
ENSMUSG00000020086.7	Macroh2a2	macroH2A.2 histone	1.20728	3.81996e-06
ENSMUSG00000071516.3	H2ac13	H2A clustered histone 13	1.34309	3.94202e-06
ENSMUSG00000034685.5	Fam171a2	family with sequence similarity 171, member A2	0.894943	4.17249e-06
ENSMUSG00000029095.18	Ablim2	actin-binding LIM protein 2	-1.40713	4.45222e-06
ENSMUSG00000031149.8	Praf2	PRA1 domain family 2	0.802247	4.63596e-06
ENSMUSG00000037005.17	Xpnpep2	X-prolyl aminopeptidase (aminopeptidase P) 2, membrane-bound	0.922969	4.72465e-06
ENSMUSG00000043613.9	Mmp3	matrix metallopeptidase 3	1.27907	4.78265e-06
ENSMUSG00000005686.18	Ampd3	adenosine monophosphate deaminase 3	0.905831	4.86085e-06
ENSMUSG00000029334.15	Prkg2	protein kinase, cGMP-dependent, type II	0.901529	4.8659e-06
ENSMUSG00000021906.15	Oxnad1	oxidoreductase NAD-binding domain containing 1	-0.888624	5.04316e-06
ENSMUSG00000033538.14	Casp4	caspase 4, apoptosis-related cysteine peptidase	0.968993	5.06936e-06
ENSMUSG00000021773.12	Comtd1	catechol-O-methyltransferase domain containing 1	-0.885066	5.19099e-06
ENSMUSG00000037921.16	Ddx60	DExD/H box helicase 60	1.89608	5.3491e-06
ENSMUSG00000028085.13	Gatb	glutamyl-tRNA(Gln) amidotransferase, subunit B	-0.853067	5.76405e-06
ENSMUSG00000075296.6	Aldh3b2	aldehyde dehydrogenase 3 family, member B2	-0.875696	6.05573e-06
ENSMUSG00000047963.8	Stbd1	starch binding domain 1	-1.54603	6.09147e-06
ENSMUSG00000034949.19	Zfr2	zinc finger RNA binding protein 2	1.31953	6.14262e-06
ENSMUSG00000037411.11	Serpine1	serine (or cysteine) peptidase inhibitor, clade E, member 1	1.12085	6.14822e-06
ENSMUSG00000054733.10	Msra	methionine sulfoxide reductase A	-0.822495	6.21682e-06
ENSMUSG00000014813.10	Stc1	stanniocalcin 1	1.197	6.30538e-06
ENSMUSG00000041605.17	Inava	innate immunity activator	3.30514	6.37333e-06
ENSMUSG00000027331.16	Knstrn	kinetochore-localized astrin/SPAG5 binding	1.41197	6.37819e-06
ENSMUSG00000049482.17	Ctu2	cytosolic thiouridylase subunit 2	1.09069	6.43318e-06
ENSMUSG00000048355.3	Arxes1	adipocyte-related X-chromosome expressed sequence 1	-0.992755	6.56128e-06
ENSMUSG00000022311.16	Csmd3	CUB and Sushi multiple domains 3	1.40361	6.71581e-06
ENSMUSG00000069309.3	H2ac22	H2A clustered histone 22	2.24047	6.80945e-06
ENSMUSG00000032085.6	Tagln	transgelin	2.64692	6.95426e-06
ENSMUSG00000028261.14	Ndufaf4	NADH:ubiquinone oxidoreductase complex assembly factor 4	-0.80315	7.26646e-06
ENSMUSG00000055148.8	Klf2	Kruppel-like factor 2 (lung)	1.32851	7.40149e-06
ENSMUSG00000060572.18	Mfap2	microfibrillar-associated protein 2	2.72518	7.59376e-06
ENSMUSG00000048706.4	Lurap1l	leucine rich adaptor protein 1-like	0.846326	7.63167e-06
ENSMUSG00000099583.3	H3c4	H3 clustered histone 4	0.981526	7.78334e-06
ENSMUSG00000040253.16	Gbp7	guanylate binding protein 7	0.987153	7.87743e-06
ENSMUSG00000003779.17	Kif20a	kinesin family member 20A	0.990718	8.51626e-06
ENSMUSG00000025934.16	Gsta3	glutathione S-transferase, alpha 3	-1.0239	8.67691e-06
ENSMUSG00000030774.14	Pak1	p21 (RAC1) activated kinase 1	1.04508	8.754e-06
ENSMUSG00000040133.3	Gpr176	G protein-coupled receptor 176	1.59424	9.31806e-06
ENSMUSG00000028678.14	Kif2c	kinesin family member 2C	1.89347	9.7335e-06
ENSMUSG00000041180.14	Hectd2	HECT domain E3 ubiquitin protein ligase 2	0.813681	1.07988e-05
ENSMUSG00000037152.12	Ndufc1	NADH:ubiquinone oxidoreductase subunit C1	-0.892938	1.12095e-05
ENSMUSG00000020432.13	Tcn2	transcobalamin 2	-0.801788	1.14232e-05
ENSMUSG00000035246.17	Pcyt1b	phosphate cytidylyltransferase 1, choline, beta isoform	1.69909	1.17285e-05
ENSMUSG00000027076.11	Timm10	translocase of inner mitochondrial membrane 10	-0.876001	1.17829e-05
ENSMUSG00000040212.13	Emp3	epithelial membrane protein 3	0.845217	1.18868e-05
ENSMUSG00000036564.18	Ndrg4	N-myc downstream regulated gene 4	0.960269	1.19039e-05
ENSMUSG00000040026.9	Saa3	serum amyloid A 3	1.62012	1.23966e-05
ENSMUSG00000031626.19	Sorbs2	sorbin and SH3 domain containing 2	1.96763	1.33953e-05
ENSMUSG00000027961.8	Lrrc39	leucine rich repeat containing 39	-0.852566	1.37927e-05
ENSMUSG00000020032.15	Nuak1	NUAK family, SNF1-like kinase, 1	0.915131	1.44081e-05
ENSMUSG00000029167.14	Ppargc1a	peroxisome proliferative activated receptor, gamma, coactivator 1 alpha	-0.985617	1.44595e-05
ENSMUSG00000024011.18	Pi16	peptidase inhibitor 16	1.25694	1.46356e-05
ENSMUSG00000064330.10	Pde6h	phosphodiesterase 6H, cGMP-specific, cone, gamma	4.89321	1.47262e-05
ENSMUSG00000004558.16	Ndrg2	N-myc downstream regulated gene 2	-0.929266	1.50705e-05
ENSMUSG00000032690.17	Oas2	2'-5' oligoadenylate synthetase 2	2.92886	1.53712e-05
ENSMUSG00000055027.18	Smyd1	SET and MYND domain containing 1	-1.06363	1.59363e-05
ENSMUSG00000078794.5	Dact3	dishevelled-binding antagonist of beta-catenin 3	0.895067	1.61193e-05
ENSMUSG00000050052.13	Tdrp	testis development related protein	-0.970443	1.64894e-05
ENSMUSG00000032369.14	Plscr1	phospholipid scramblase 1	0.840931	1.66694e-05
ENSMUSG00000041120.7	Nbl1	NBL1, DAN family BMP antagonist	0.807678	1.68216e-05
ENSMUSG00000036036.16	Zfp57	zinc finger protein 57	1.11655	1.72142e-05
ENSMUSG00000049409.10	Prokr1	prokineticin receptor 1	1.39381	1.764e-05
ENSMUSG00000025352.7	Gdf11	growth differentiation factor 11	0.96866	1.77182e-05
ENSMUSG00000048388.4	Fam171b	family with sequence similarity 171, member B	1.2185	1.82813e-05
ENSMUSG00000045102.13	Poln	DNA polymerase N	-0.846542	1.89989e-05
ENSMUSG00000071478.7	H2ac7	H2A clustered histone 7	1.21943	1.97914e-05
ENSMUSG00000006378.16	Gcat	glycine C-acetyltransferase (2-amino-3-ketobutyrate-coenzyme A ligase)	-0.837827	2.0436e-05
ENSMUSG00000028497.13	Hacd4	3-hydroxyacyl-CoA dehydratase 4	0.927678	2.2507e-05
ENSMUSG00000049866.13	Arl4c	ADP-ribosylation factor-like 4C	1.43402	2.35114e-05
ENSMUSG00000025105.11	Bnc1	basonuclin 1	2.06375	2.36015e-05
ENSMUSG00000057346.13	Apol9a	apolipoprotein L 9a	1.92859	2.38662e-05
ENSMUSG00000044365.16	Cxxc4	CXXC finger 4	1.16691	2.52911e-05
ENSMUSG00000053062.17	Jam2	junction adhesion molecule 2	1.45247	2.54348e-05
ENSMUSG00000004655.6	Aqp1	aquaporin 1	0.98435	2.58022e-05
ENSMUSG00000027777.16	Schip1	schwannomin interacting protein 1	1.72141	2.60235e-05
ENSMUSG00000030088.16	Aldh1l1	aldehyde dehydrogenase 1 family, member L1	-1.23502	2.84222e-05
ENSMUSG00000069793.13	Slfn9	schlafen 9	1.03763	2.87315e-05
ENSMUSG00000038259.5	Gdf5	growth differentiation factor 5	-0.893931	2.98118e-05
ENSMUSG00000040998.19	Npnt	nephronectin	-1.00325	2.99005e-05
ENSMUSG00000024544.10	Ldlrad4	low density lipoprotein receptor class A domain containing 4	0.86136	3.07607e-05
ENSMUSG00000067818.7	Myl9	myosin, light polypeptide 9, regulatory	1.70798	3.10095e-05
ENSMUSG00000023046.7	Igfbp6	insulin-like growth factor binding protein 6	1.88243	3.13565e-05
ENSMUSG00000030317.9	Timp4	tissue inhibitor of metalloproteinase 4	-1.62284	3.25065e-05
ENSMUSG00000043065.13	Spice1	spindle and centriole associated protein 1	1.21464	3.46022e-05
ENSMUSG00000029636.12	Wasf3	WASP family, member 3	1.50821	3.50822e-05
ENSMUSG00000030867.8	Plk1	polo like kinase 1	1.7697	3.71774e-05
ENSMUSG00000049241.6	Hcar1	hydrocarboxylic acid receptor 1	-0.90386	3.72133e-05
ENSMUSG00000031367.16	Ap1s2	adaptor-related protein complex 1, sigma 2 subunit	0.842527	3.74018e-05
ENSMUSG00000069874.8	Irgm2	immunity-related GTPase family M member 2	0.914449	3.91427e-05
ENSMUSG00000024948.16	Map4k2	mitogen-activated protein kinase kinase kinase kinase 2	-0.964305	4.01348e-05
ENSMUSG00000038943.17	Prc1	protein regulator of cytokinesis 1	1.17488	4.18425e-05
ENSMUSG00000081058.6	H3c15	H3 clustered histone 15	0.817848	4.19115e-05
ENSMUSG00000031659.14	Adcy7	adenylate cyclase 7	1.85995	4.23863e-05
ENSMUSG00000030972.7	Acsm5	acyl-CoA synthetase medium-chain family member 5	-1.46849	4.4179e-05
ENSMUSG00000032717.15	Mdfi	MyoD family inhibitor	1.35626	4.45205e-05
ENSMUSG00000022831.15	Hcls1	hematopoietic cell specific Lyn substrate 1	-1.34085	4.62608e-05
ENSMUSG00000038235.5	F11r	F11 receptor	-1.18263	4.93801e-05
ENSMUSG00000020251.14	Glt8d2	glycosyltransferase 8 domain containing 2	0.84971	4.95027e-05
ENSMUSG00000025420.14	Katnal2	katanin p60 subunit A-like 2	-1.14715	4.98563e-05
ENSMUSG00000032243.9	Itga11	integrin alpha 11	2.01253	5.57763e-05
ENSMUSG00000020638.9	Cmpk2	cytidine monophosphate (UMP-CMP) kinase 2, mitochondrial	2.56908	5.78791e-05
ENSMUSG00000046432.13	Bex3	brain expressed X-linked 3	0.870706	6.21466e-05
ENSMUSG00000019775.18	Rgs17	regulator of G-protein signaling 17	-1.10324	6.35229e-05
ENSMUSG00000027171.11	Prrg4	proline rich Gla (G-carboxyglutamic acid) 4 (transmembrane)	-0.963229	6.5737e-05
ENSMUSG00000006457.5	Actn3	actinin alpha 3	1.44002	6.59757e-05
ENSMUSG00000020926.17	Adam11	a disintegrin and metallopeptidase domain 11	2.47803	6.78581e-05
ENSMUSG00000005237.15	Dnah2	dynein, axonemal, heavy chain 2	3.8077	7.28385e-05
ENSMUSG00000063687.4	Pcdhb5	protocadherin beta 5	1.141	7.34181e-05
ENSMUSG00000047139.10	Cd24a	CD24a antigen	1.08123	7.84546e-05
ENSMUSG00000043531.17	Sorcs1	sortilin-related VPS10 domain containing receptor 1	1.34016	7.89982e-05
ENSMUSG00000020334.7	Slc22a4	solute carrier family 22 (organic cation transporter), member 4	-1.26464	8.07592e-05
ENSMUSG00000044906.7	4930503L19Rik	RIKEN cDNA 4930503L19 gene	1.0473	8.24468e-05
ENSMUSG00000052688.13	Rab7b	RAB7B, member RAS oncogene family	1.0381	8.25534e-05
ENSMUSG00000020205.9	Phlda1	pleckstrin homology like domain, family A, member 1	1.07589	8.40279e-05
ENSMUSG00000036192.16	Rorb	RAR-related orphan receptor beta	1.2461	8.43845e-05
ENSMUSG00000019779.16	Frk	fyn-related kinase	0.868883	8.45158e-05
ENSMUSG00000021359.17	Tfap2a	transcription factor AP-2, alpha	0.930335	8.50517e-05
ENSMUSG00000031785.17	Adgrg1	adhesion G protein-coupled receptor G1	-0.805517	8.97881e-05
ENSMUSG00000070780.12	Rbm47	RNA binding motif protein 47	-0.933214	9.33356e-05
ENSMUSG00000026204.16	Ptprn	protein tyrosine phosphatase, receptor type, N	1.34951	9.49225e-05
ENSMUSG00000025407.8	Gli1	GLI-Kruppel family member GLI1	1.97466	9.69104e-05
ENSMUSG00000099517.3	H3c8	H3 clustered histone 8	1.34166	9.73317e-05
ENSMUSG00000020186.8	Csrp2	cysteine and glycine-rich protein 2	0.858336	9.977e-05
ENSMUSG00000038718.16	Pbx3	pre B cell leukemia homeobox 3	0.888106	0.00010051
ENSMUSG00000074207.11	Adh1	alcohol dehydrogenase 1 (class I)	-1.00196	0.000103232
ENSMUSG00000035493.11	Tgfbi	transforming growth factor, beta induced	1.0719	0.000103819
ENSMUSG00000025277.15	Abhd6	abhydrolase domain containing 6	-0.908679	0.000106571
ENSMUSG00000079553.12	Kifc1	kinesin family member C1	1.25651	0.000112824
ENSMUSG00000058290.5	Espl1	extra spindle pole bodies 1, separase	1.36398	0.000113597
ENSMUSG00000054720.13	Lrrc8c	leucine rich repeat containing 8 family, member C	0.902403	0.000113959
ENSMUSG00000041911.4	Dlx1	distal-less homeobox 1	2.29952	0.000114564
ENSMUSG00000045328.12	Cenpe	centromere protein E	1.01047	0.000118139
ENSMUSG00000015980.15	Lrrc27	leucine rich repeat containing 27	-1.03942	0.000119797
ENSMUSG00000045569.8	Mc2r	melanocortin 2 receptor	-0.950168	0.000119938
ENSMUSG00000100254.2	Trpc2	transient receptor potential cation channel, subfamily C, member 2	6.97082	0.000129168
ENSMUSG00000026235.15	Epha4	Eph receptor A4	0.985937	0.00013599
ENSMUSG00000026955.14	Sapcd2	suppressor APC domain containing 2	4.15338	0.00013677
ENSMUSG00000027329.10	Spef1	sperm flagellar 1	-0.829036	0.000144984
ENSMUSG00000027306.16	Nusap1	nucleolar and spindle associated protein 1	1.29705	0.000147306
ENSMUSG00000023945.8	Slc5a7	solute carrier family 5 (choline transporter), member 7	0.850493	0.000148636
ENSMUSG00000020740.14	Gga3	golgi associated, gamma adaptin ear containing, ARF binding protein 3	1.095	0.00014953
ENSMUSG00000056592.15	Zfp658	zinc finger protein 658	0.94749	0.000150034
ENSMUSG00000023011.9	Faim2	Fas apoptotic inhibitory molecule 2	2.20116	0.00015836
ENSMUSG00000078606.9	Gvin2	GTPase, very large interferon inducible, family member 2	1.00785	0.00016136
ENSMUSG00000051378.11	Kif18b	kinesin family member 18B	1.98384	0.000161755
ENSMUSG00000025880.12	Smad7	SMAD family member 7	1.36785	0.00016324
ENSMUSG00000030830.19	Itgal	integrin alpha L	-1.52115	0.000163811
ENSMUSG00000024795.12	Kif20b	kinesin family member 20B	1.02689	0.000177153
ENSMUSG00000042099.17	Kank3	KN motif and ankyrin repeat domains 3	1.30918	0.000177259
ENSMUSG00000071531.4	Gprin2	G protein regulated inducer of neurite outgrowth 2	-3.7014	0.000178229
ENSMUSG00000009731.5	Kcnd1	potassium voltage-gated channel, Shal-related family, member 1	1.02539	0.000179703
ENSMUSG00000032254.11	Kif23	kinesin family member 23	1.66791	0.00018739
ENSMUSG00000043903.5	Zfp469	zinc finger protein 469	1.15045	0.000190308
ENSMUSG00000066607.6	Insyn1	inhibitory synaptic factor 1	0.858845	0.000191135
ENSMUSG00000041731.14	Pgm5	phosphoglucomutase 5	1.42025	0.000202689
ENSMUSG00000090272.10	Mndal	myeloid nuclear differentiation antigen like	1.05897	0.000203915
ENSMUSG00000037020.17	Wdr62	WD repeat domain 62	-0.804454	0.000204288
ENSMUSG00000033826.11	Dnah8	dynein, axonemal, heavy chain 8	4.52478	0.000205428
ENSMUSG00000029650.11	Slc46a3	solute carrier family 46, member 3	-0.870922	0.000212395
ENSMUSG00000057457.12	Phex	phosphate regulating endopeptidase homolog, X-linked	1.11426	0.000221243
ENSMUSG00000035948.14	Acss3	acyl-CoA synthetase short-chain family member 3	-1.03417	0.000228124
ENSMUSG00000040035.15	Disp2	dispatched RND tramsporter family member 2	-0.95341	0.000238613
ENSMUSG00000049539.4	H1f1	H1.1 linker histone, cluster member	2.08962	0.000239361
ENSMUSG00000023990.19	Tfeb	transcription factor EB	-0.860533	0.00024817
ENSMUSG00000079017.4	Ifi27l2a	interferon, alpha-inducible protein 27 like 2A	-0.861629	0.000253438
ENSMUSG00000028175.16	Depdc1a	DEP domain containing 1a	2.13859	0.000257835
ENSMUSG00000027379.14	Bub1	BUB1, mitotic checkpoint serine/threonine kinase	1.39183	0.000259898
ENSMUSG00000024302.17	Dtna	dystrobrevin alpha	1.14219	0.000263419
ENSMUSG00000071047.6	Ces1a	carboxylesterase 1A	0.952643	0.000274528
ENSMUSG00000032198.10	Dock6	dedicator of cytokinesis 6	0.867255	0.000279413
ENSMUSG00000041406.15	BC055324	cDNA sequence BC055324	1.67101	0.000284302
ENSMUSG00000028944.15	Prkag2	protein kinase, AMP-activated, gamma 2 non-catalytic subunit	-0.894959	0.000285215
ENSMUSG00000029195.11	Klb	klotho beta	-0.804433	0.000292314
ENSMUSG00000027220.3	Syt13	synaptotagmin XIII	1.59667	0.000294282
ENSMUSG00000001517.15	Foxm1	forkhead box M1	1.11487	0.000300105
ENSMUSG00000038260.11	Trpm4	transient receptor potential cation channel, subfamily M, member 4	0.921578	0.000308529
ENSMUSG00000061815.12	Rufy4	RUN and FYVE domain containing 4	-1.5064	0.000315039
ENSMUSG00000034311.4	Kif4	kinesin family member 4	1.28755	0.00032175
ENSMUSG00000052776.11	Oas1a	2'-5' oligoadenylate synthetase 1A	3.42223	0.000338819
ENSMUSG00000025347.5	Mettl7b	methyltransferase like 7B	-0.876358	0.000346201
ENSMUSG00000012889.9	Podnl1	podocan-like 1	1.4533	0.000346922
ENSMUSG00000050705.16	2310061I04Rik	RIKEN cDNA 2310061I04 gene	-0.829847	0.000353035
ENSMUSG00000036437.7	Npy1r	neuropeptide Y receptor Y1	1.06641	0.000354727
ENSMUSG00000052920.17	Prkg1	protein kinase, cGMP-dependent, type I	1.24494	0.000362987
ENSMUSG00000022853.8	Ehhadh	enoyl-Coenzyme A, hydratase/3-hydroxyacyl Coenzyme A dehydrogenase	-0.965254	0.000371198
ENSMUSG00000028572.14	Hook1	hook microtubule tethering protein 1	-2.40196	0.000376812
ENSMUSG00000058665.9	En1	engrailed 1	0.803484	0.000384572
ENSMUSG00000035692.8	Isg15	ISG15 ubiquitin-like modifier	1.7679	0.0003916
ENSMUSG00000034656.19	Cacna1a	calcium channel, voltage-dependent, P/Q type, alpha 1A subunit	1.66215	0.000392569
ENSMUSG00000040254.12	Sema3d	sema domain, immunoglobulin domain (Ig), short basic domain, secreted, (semaphorin) 3D	2.06991	0.000392865
ENSMUSG00000069268.5	H2bc7	H2B clustered histone 7	0.978344	0.000403662
ENSMUSG00000039153.18	Runx2	runt related transcription factor 2	0.842958	0.00040553
ENSMUSG00000028744.16	Slc66a1	solute carrier family 66 member 1	-0.817099	0.000408316
ENSMUSG00000027562.13	Car2	carbonic anhydrase 2	-1.22919	0.000409585
ENSMUSG00000029298.16	Gbp9	guanylate-binding protein 9	2.03493	0.000421679
ENSMUSG00000028919.12	Arhgef19	Rho guanine nucleotide exchange factor (GEF) 19	0.981264	0.000426492
ENSMUSG00000006014.17	Prg4	proteoglycan 4 (megakaryocyte stimulating factor, articular superficial zone protein)	-1.63255	0.000450436
ENSMUSG00000010154.8	Spire2	spire type actin nucleation factor 2	1.54318	0.000453241
ENSMUSG00000036109.18	Mbnl3	muscleblind like splicing factor 3	0.806715	0.000453488
ENSMUSG00000041889.8	Shisa4	shisa family member 4	0.84491	0.000455093
ENSMUSG00000038644.15	Pold1	polymerase (DNA directed), delta 1, catalytic subunit	0.956271	0.000481059
ENSMUSG00000044548.12	Dact1	dishevelled-binding antagonist of beta-catenin 1	1.22838	0.000485605
ENSMUSG00000030790.16	Adm	adrenomedullin	1.25549	0.000491191
ENSMUSG00000024593.16	Megf10	multiple EGF-like-domains 10	0.995696	0.000493369
ENSMUSG00000046402.11	Rbp1	retinol binding protein 1, cellular	0.972492	0.000505207
ENSMUSG00000026639.19	Lamb3	laminin, beta 3	-0.927953	0.000513645
ENSMUSG00000047534.18	Mis18bp1	MIS18 binding protein 1	1.30608	0.000522165
ENSMUSG00000056162.15	Cndp1	carnosine dipeptidase 1 (metallopeptidase M20 family)	-1.12575	0.000529278
ENSMUSG00000005873.7	Reep5	receptor accessory protein 5	-0.887258	0.000531511
ENSMUSG00000024866.11	Acy3	aspartoacylase (aminoacylase) 3	-0.823844	0.000542673
ENSMUSG00000027488.13	Snta1	syntrophin, acidic 1	-1.08423	0.000557438
ENSMUSG00000030244.8	Gys2	glycogen synthase 2	-1.84823	0.000564743
ENSMUSG00000024590.9	Lmnb1	lamin B1	0.880043	0.000584183
ENSMUSG00000040621.15	Gemin8	gem nuclear organelle associated protein 8	0.854978	0.000595244
ENSMUSG00000054293.11	P2ry10b	purinergic receptor P2Y, G-protein coupled 10B	0.922003	0.000598757
ENSMUSG00000009246.15	Trpm5	transient receptor potential cation channel, subfamily M, member 5	1.62653	0.000605815
ENSMUSG00000029445.14	Hpd	4-hydroxyphenylpyruvic acid dioxygenase	-1.59216	0.000621842
ENSMUSG00000079597.3	Cstdc4	cystatin domain containing 4	-1.68585	0.000624806
ENSMUSG00000008153.13	Clstn3	calsyntenin 3	-0.805221	0.000636411
ENSMUSG00000024349.11	Sting1	stimulator of interferon response cGAMP interactor 1	0.993972	0.000637774
ENSMUSG00000037990.19	Sh3rf3	SH3 domain containing ring finger 3	1.01973	0.000654263
ENSMUSG00000024330.18	Col11a2	collagen, type XI, alpha 2	-0.816467	0.000657087
ENSMUSG00000034839.6	Larp6	La ribonucleoprotein 6, translational regulator	1.15089	0.000682952
ENSMUSG00000045348.17	Nyap1	neuronal tyrosine-phosphorylated phosphoinositide 3-kinase adaptor 1	1.36039	0.000691818
ENSMUSG00000051920.8	Rspo2	R-spondin 2	1.31323	0.000691891
ENSMUSG00000043036.14	Ccdc63	coiled-coil domain containing 63	2.10225	0.000705947
ENSMUSG00000032246.15	Calml4	calmodulin-like 4	1.16774	0.000712131
ENSMUSG00000028470.11	Hint2	histidine triad nucleotide binding protein 2	-0.813003	0.000714153
ENSMUSG00000040957.16	Cables1	CDK5 and Abl enzyme substrate 1	-0.831993	0.000733263
ENSMUSG00000054252.19	Fgfr3	fibroblast growth factor receptor 3	-1.15564	0.000760541
ENSMUSG00000041431.17	Ccnb1	cyclin B1	0.935011	0.000761335
ENSMUSG00000035860.10	Cdhr3	cadherin-related family member 3	-1.09369	0.00076664
ENSMUSG00000051331.17	Cacna1c	calcium channel, voltage-dependent, L type, alpha 1C subunit	0.818067	0.000780146
ENSMUSG00000042766.18	Trim46	tripartite motif-containing 46	1.05553	0.000798949
ENSMUSG00000042041.8	2010003K11Rik	RIKEN cDNA 2010003K11 gene	-0.971953	0.000812594
ENSMUSG00000020614.14	Fam20a	FAM20A, golgi associated secretory pathway pseudokinase	1.40066	0.000815229
ENSMUSG00000027699.20	Ect2	ect2 oncogene	1.21328	0.000831317
ENSMUSG00000079092.5	Prl2c2	prolactin family 2, subfamily c, member 2	1.25396	0.000870852
ENSMUSG00000040640.12	Erc2	ELKS/RAB6-interacting/CAST family member 2	1.03625	0.000928538
ENSMUSG00000002771.13	Grin2d	glutamate receptor, ionotropic, NMDA2D (epsilon 4)	1.42357	0.000952948
ENSMUSG00000039395.9	Mreg	melanoregulin	-2.02529	0.000969835
ENSMUSG00000002266.18	Zim1	zinc finger, imprinted 1	4.02248	0.000973757
ENSMUSG00000024395.10	Lims2	LIM and senescent cell antigen like domains 2	-1.02835	0.000976515
ENSMUSG00000089675.2	Ugt1a8	UDP glucuronosyltransferase 1 family, polypeptide A8	-3.81374	0.000986798
ENSMUSG00000094338.2	H2bc13	H2B clustered histone 13	0.943344	0.000999084
ENSMUSG00000003355.8	Fkbp11	FK506 binding protein 11	0.929254	0.000999948
ENSMUSG00000031827.14	Cotl1	coactosin-like 1 (Dictyostelium)	0.848527	0.00101158
ENSMUSG00000030116.15	Mfap5	microfibrillar associated protein 5	1.45931	0.00101266
ENSMUSG00000054717.8	Hmgb2	high mobility group box 2	0.83963	0.0010443
ENSMUSG00000030761.17	Myo7a	myosin VIIA	1.14659	0.00105503
ENSMUSG00000040936.16	Ulk4	unc-51-like kinase 4	1.10616	0.00106164
ENSMUSG00000022421.21	Nptxr	neuronal pentraxin receptor	1.26012	0.00106464
ENSMUSG00000078920.4	Ifi47	interferon gamma inducible protein 47	1.49449	0.00108484
ENSMUSG00000044551.14	9930012K11Rik	RIKEN cDNA 9930012K11 gene	0.929188	0.0010973
ENSMUSG00000038146.9	Notch3	notch 3	0.916126	0.00111788
ENSMUSG00000049604.4	Hoxb13	homeobox B13	-1.74693	0.00112227
ENSMUSG00000050605.18	Zfp61	zinc finger protein 61	0.908999	0.00113588
ENSMUSG00000004267.17	Eno2	enolase 2, gamma neuronal	1.20058	0.00114032
ENSMUSG00000075316.12	Scn9a	sodium channel, voltage-gated, type IX, alpha	2.22429	0.00114633
ENSMUSG00000026222.17	Sp100	nuclear antigen Sp100	1.13636	0.00116372
ENSMUSG00000026890.20	Lhx6	LIM homeobox protein 6	1.75819	0.00116708
ENSMUSG00000027611.13	Procr	protein C receptor, endothelial	1.33162	0.00119625
ENSMUSG00000078234.7	Klhdc7a	kelch domain containing 7A	-1.40469	0.00121007
ENSMUSG00000030772.7	Dkk3	dickkopf WNT signaling pathway inhibitor 3	1.44593	0.00122128
ENSMUSG00000053198.15	Prx	periaxin	0.872433	0.00124034
ENSMUSG00000042489.16	Clspn	claspin	1.61131	0.00127615
ENSMUSG00000021903.12	Galnt15	polypeptide N-acetylgalactosaminyltransferase 15	-1.95071	0.00132048
ENSMUSG00000070604.6	Vsig10l	V-set and immunoglobulin domain containing 10 like	1.03853	0.00136175
ENSMUSG00000035208.17	Slfn8	schlafen 8	2.00445	0.00137501
ENSMUSG00000040204.7	Pclaf	PCNA clamp associated factor	1.06119	0.00139146
ENSMUSG00000022385.12	Gtse1	G two S phase expressed protein 1	1.14267	0.00140735
ENSMUSG00000027669.15	Gnb4	guanine nucleotide binding protein (G protein), beta 4	1.06559	0.00141271
ENSMUSG00000010461.17	Eya4	EYA transcriptional coactivator and phosphatase 4	1.07037	0.00145716
ENSMUSG00000033355.7	Rtp4	receptor transporter protein 4	1.33959	0.00149177
ENSMUSG00000038379.16	Ttk	Ttk protein kinase	1.45585	0.0015141
ENSMUSG00000020330.17	Hmmr	hyaluronan mediated motility receptor (RHAMM)	0.897043	0.00151829
ENSMUSG00000029769.17	Ccdc136	coiled-coil domain containing 136	0.953173	0.00153078
ENSMUSG00000036800.9	Fam135b	family with sequence similarity 135, member B	-2.13176	0.00163349
ENSMUSG00000031239.6	Itm2a	integral membrane protein 2A	0.846128	0.00163748
ENSMUSG00000037572.18	Wdhd1	WD repeat and HMG-box DNA binding protein 1	0.913973	0.00164208
ENSMUSG00000019863.8	Qrsl1	glutaminyl-tRNA synthase (glutamine-hydrolyzing)-like 1	-0.816205	0.00173082
ENSMUSG00000037946.12	Fgd3	FYVE, RhoGEF and PH domain containing 3	1.96568	0.00174047
ENSMUSG00000000126.12	Wnt9a	wingless-type MMTV integration site family, member 9A	1.49913	0.00175349
ENSMUSG00000030895.10	Hpx	hemopexin	-1.05031	0.00178187
ENSMUSG00000019647.17	Sema6a	sema domain, transmembrane domain (TM), and cytoplasmic domain, (semaphorin) 6A	2.42524	0.0017864
ENSMUSG00000005089.16	Slc1a2	solute carrier family 1 (glial high affinity glutamate transporter), member 2	-2.63843	0.00184755
ENSMUSG00000046223.11	Plaur	plasminogen activator, urokinase receptor	1.57605	0.00193006
ENSMUSG00000034394.15	Lif	leukemia inhibitory factor	2.4598	0.00199402
ENSMUSG00000032942.15	Ucp3	uncoupling protein 3 (mitochondrial, proton carrier)	-1.60049	0.0020404
ENSMUSG00000031202.6	Rab39b	RAB39B, member RAS oncogene family	1.23913	0.00204694
ENSMUSG00000061397.9	Krt79	keratin 79	-1.93763	0.00205607
ENSMUSG00000011148.15	Adssl1	adenylosuccinate synthetase like 1	-1.19369	0.00207169
ENSMUSG00000034758.13	Tle6	transducin-like enhancer of split 6	0.915837	0.00211991
ENSMUSG00000070425.14	Xntrpc	Xndc1-transient receptor potential cation channel, subfamily C, member 2 readthrough	-1.74308	0.00222756
ENSMUSG00000074577.10	Ripor3	RIPOR family member 3	1.33451	0.00223942
ENSMUSG00000045934.16	Mtmr11	myotubularin related protein 11	1.28064	0.00227528
ENSMUSG00000015337.6	Endog	endonuclease G	-0.830729	0.00228851
ENSMUSG00000072949.7	Acot1	acyl-CoA thioesterase 1	1.80829	0.00231381
ENSMUSG00000037624.16	Kcnk2	potassium channel, subfamily K, member 2	1.71286	0.00233689
ENSMUSG00000030187.16	Klra2	killer cell lectin-like receptor, subfamily A, member 2	-0.88541	0.00236267
ENSMUSG00000032218.8	Ccnb2	cyclin B2	1.5121	0.00236303
ENSMUSG00000016624.16	Phf21b	PHD finger protein 21B	1.85328	0.00245289
ENSMUSG00000053007.10	Creb5	cAMP responsive element binding protein 5	1.59499	0.0025998
ENSMUSG00000034855.14	Cxcl10	chemokine (C-X-C motif) ligand 10	3.37739	0.00261168
ENSMUSG00000034645.15	Zyg11a	zyg-11 family member A, cell cycle regulator	-1.35469	0.00266287
ENSMUSG00000030680.7	Pagr1a	PAXIP1 associated glutamate rich protein 1A	0.838176	0.00279931
ENSMUSG00000015647.10	Lama5	laminin, alpha 5	0.900142	0.00280202
ENSMUSG00000069516.9	Lyz2	lysozyme 2	1.38094	0.00283075
ENSMUSG00000056144.15	Trim34a	tripartite motif-containing 34A	1.60028	0.00283094
ENSMUSG00000005947.12	Itgae	integrin alpha E, epithelial-associated	-1.21584	0.00292904
ENSMUSG00000063063.13	Ctnna2	catenin (cadherin associated protein), alpha 2	1.35924	0.0029376
ENSMUSG00000026271.16	Gpr35	G protein-coupled receptor 35	-2.87078	0.00302911
ENSMUSG00000078853.9	Igtp	interferon gamma induced GTPase	0.97099	0.00309648
ENSMUSG00000114456.2	H2bc9	H2B clustered histone 9	0.87343	0.00311212
ENSMUSG00000039936.19	Pik3cd	phosphatidylinositol-4,5-bisphosphate 3-kinase catalytic subunit delta	1.29804	0.00314304
ENSMUSG00000020774.10	Aspa	aspartoacylase	-1.25141	0.00320028
ENSMUSG00000026764.16	Kif5c	kinesin family member 5C	0.820738	0.00324229
ENSMUSG00000017861.12	Mybl2	myeloblastosis oncogene-like 2	1.59009	0.00324685
ENSMUSG00000057706.8	Mex3b	mex3 RNA binding family member B	0.836136	0.00330402
ENSMUSG00000029370.11	Rassf6	Ras association (RalGDS/AF-6) domain family member 6	-1.29186	0.00342495
ENSMUSG00000037995.16	Igsf9	immunoglobulin superfamily, member 9	1.66207	0.00345841
ENSMUSG00000069274.4	H4c6	H4 clustered histone 6	0.888662	0.00349518
ENSMUSG00000022235.16	Cmbl	carboxymethylenebutenolidase-like (Pseudomonas)	-0.937048	0.00358875
ENSMUSG00000053626.6	Tll1	tolloid-like	0.946557	0.0037066
ENSMUSG00000022575.6	Gsdmd	gasdermin D	1.28	0.00383432
ENSMUSG00000034317.15	Trim59	tripartite motif-containing 59	0.955533	0.0038811
ENSMUSG00000004609.12	Cd33	CD33 antigen	1.76185	0.00388358
ENSMUSG00000046727.14	Cystm1	cysteine-rich transmembrane module containing 1	-1.40804	0.00391142
ENSMUSG00000028028.12	Alpk1	alpha-kinase 1	0.88281	0.0041472
ENSMUSG00000066894.15	Vsig10	V-set and immunoglobulin domain containing 10	0.989092	0.00416804
ENSMUSG00000027800.15	Tm4sf1	transmembrane 4 superfamily member 1	0.960798	0.00425392
ENSMUSG00000033208.8	S100b	S100 protein, beta polypeptide, neural	-0.820765	0.0043586
ENSMUSG00000029765.13	Plxna4	plexin A4	0.921079	0.00436041
ENSMUSG00000024056.11	Ndc80	NDC80 kinetochore complex component	1.15267	0.00443385
ENSMUSG00000038357.11	Camp	cathelicidin antimicrobial peptide	-1.01417	0.00445649
ENSMUSG00000029648.14	Flt1	FMS-like tyrosine kinase 1	1.04161	0.00453495
ENSMUSG00000033849.4	B3galt2	UDP-Gal:betaGlcNAc beta 1,3-galactosyltransferase, polypeptide 2	-0.94373	0.00456221
ENSMUSG00000016024.10	Lbp	lipopolysaccharide binding protein	1.13862	0.00459476
ENSMUSG00000027762.7	Sucnr1	succinate receptor 1	-1.54579	0.00464177
ENSMUSG00000056679.14	Gpr173	G-protein coupled receptor 173	0.922397	0.00479456
ENSMUSG00000021047.8	Nova1	NOVA alternative splicing regulator 1	2.4247	0.00480676
ENSMUSG00000051220.3	Ercc6l	excision repair cross-complementing rodent repair deficiency complementation group 6 like	0.957592	0.00480856
ENSMUSG00000045092.9	S1pr1	sphingosine-1-phosphate receptor 1	0.927443	0.00484554
ENSMUSG00000024376.8	Epb41l4a	erythrocyte membrane protein band 4.1 like 4a	0.989459	0.00486342
ENSMUSG00000058966.14	Tlcd3b	TLC domain containing 3B	-1.23387	0.00494969
ENSMUSG00000037451.9	Slc22a20	solute carrier family 22 (organic anion transporter), member 20	-0.958471	0.00498182
ENSMUSG00000070526.3	Peg12	paternally expressed 12	1.15134	0.00499283
ENSMUSG00000034059.15	Ypel4	yippee like 4	1.14891	0.00500163
ENSMUSG00000105096.2	Gbp10	guanylate-binding protein 10	-1.05426	0.0050209
ENSMUSG00000022041.11	Chrna2	cholinergic receptor, nicotinic, alpha polypeptide 2 (neuronal)	-2.17119	0.00502339
ENSMUSG00000028832.12	Stmn1	stathmin 1	1.36298	0.00506961
ENSMUSG00000015053.15	Gata2	GATA binding protein 2	1.3187	0.00507395
ENSMUSG00000071001.5	Hrct1	histidine rich carboxyl terminus 1	-1.00043	0.00513281
ENSMUSG00000059430.15	Actg2	actin, gamma 2, smooth muscle, enteric	2.0265	0.00518783
ENSMUSG00000032013.7	Trim29	tripartite motif-containing 29	-0.85424	0.00519957
ENSMUSG00000031387.15	Renbp	renin binding protein	0.8325	0.00526892
ENSMUSG00000019773.8	Fbxo5	F-box protein 5	1.3383	0.00527938
ENSMUSG00000020895.15	Tmem107	transmembrane protein 107	1.06008	0.00531331
ENSMUSG00000027603.16	Ggt7	gamma-glutamyltransferase 7	1.09454	0.00536598
ENSMUSG00000034206.16	Polq	polymerase (DNA directed), theta	1.03253	0.00538823
ENSMUSG00000074264.13	Amy1	amylase 1, salivary	-0.996737	0.00539382
ENSMUSG00000063594.6	Gng8	guanine nucleotide binding protein (G protein), gamma 8	1.38744	0.00541047
ENSMUSG00000020623.12	Map2k6	mitogen-activated protein kinase kinase 6	0.825861	0.00542038
ENSMUSG00000046179.18	E2f8	E2F transcription factor 8	2.08131	0.00544996
ENSMUSG00000021822.4	Plau	plasminogen activator, urokinase	1.16992	0.00550216
ENSMUSG00000028978.13	Nos3	nitric oxide synthase 3, endothelial cell	-0.978131	0.00556256
ENSMUSG00000036306.14	Lzts1	leucine zipper, putative tumor suppressor 1	-1.17082	0.00569396
ENSMUSG00000091183.6	Gm5141	predicted gene 5141	0.908032	0.00582044
ENSMUSG00000061393.15	Acvr2b	activin receptor IIB	-0.821873	0.0058771
ENSMUSG00000041642.19	Kif21b	kinesin family member 21B	0.875632	0.00593106
ENSMUSG00000062380.5	Tubb3	tubulin, beta 3 class III	2.32532	0.0059375
ENSMUSG00000025422.11	Agap2	ArfGAP with GTPase domain, ankyrin repeat and PH domain 2	0.957076	0.00596959
ENSMUSG00000022490.8	Ppp1r1a	protein phosphatase 1, regulatory inhibitor subunit 1A	-1.12699	0.00607482
ENSMUSG00000063021.4	H2ac15	H2A clustered histone 15	0.993008	0.00622246
ENSMUSG00000061100.6	Retnla	resistin like alpha	-1.72441	0.0062534
ENSMUSG00000009185.3	Ccl8	chemokine (C-C motif) ligand 8	2.36805	0.00628428
ENSMUSG00000030638.14	Sh3gl3	SH3-domain GRB2-like 3	1.53074	0.00645579
ENSMUSG00000001507.17	Itga3	integrin alpha 3	0.942605	0.00666131
ENSMUSG00000038754.6	Elovl3	elongation of very long chain fatty acids (FEN1/Elo2, SUR4/Elo3, yeast)-like 3	-1.54449	0.00672483
ENSMUSG00000031250.9	Tnmd	tenomodulin	2.91888	0.00674394
ENSMUSG00000031698.15	Mylk3	myosin light chain kinase 3	2.21781	0.00687172
ENSMUSG00000047344.10	Lancl3	LanC lantibiotic synthetase component C-like 3 (bacterial)	1.50372	0.00720426
ENSMUSG00000021260.9	Hhipl1	hedgehog interacting protein-like 1	0.803562	0.00726849
ENSMUSG00000042500.12	Ago4	argonaute RISC catalytic subunit 4	2.13036	0.00728869
ENSMUSG00000068794.8	Col28a1	collagen, type XXVIII, alpha 1	0.842228	0.00738411
ENSMUSG00000047307.3	Pcdhb13	protocadherin beta 13	0.940914	0.00745837
ENSMUSG00000041552.8	Ptchd1	patched domain containing 1	1.07471	0.00756434
ENSMUSG00000028702.16	Rad54l	RAD54 like (S. cerevisiae)	1.47878	0.00765287
ENSMUSG00000053461.10	Hhipl2	hedgehog interacting protein-like 2	-4.07999	0.00769
ENSMUSG00000031340.9	Gabre	gamma-aminobutyric acid (GABA) A receptor, subunit epsilon	0.833076	0.00774414
ENSMUSG00000035459.19	Stab2	stabilin 2	1.9745	0.00782807
ENSMUSG00000052353.14	Cemip	cell migration inducing protein, hyaluronan binding	0.834803	0.00783634
ENSMUSG00000041144.13	Dnah7b	dynein, axonemal, heavy chain 7B	0.855355	0.00798366
ENSMUSG00000037860.16	Aim2	absent in melanoma 2	2.85859	0.00803338
ENSMUSG00000027456.9	Sdcbp2	syndecan binding protein (syntenin) 2	-1.41654	0.00814649
ENSMUSG00000061414.9	Cracr2a	calcium release activated channel regulator 2A	0.806664	0.00816805
ENSMUSG00000022577.18	Ly6h	lymphocyte antigen 6 complex, locus H	-0.868751	0.00829461
ENSMUSG00000034881.9	Tbxa2r	thromboxane A2 receptor	1.21497	0.00843017
ENSMUSG00000053646.14	Plxnb1	plexin B1	1.04166	0.00844263
ENSMUSG00000061718.13	Ppp1r1b	protein phosphatase 1, regulatory inhibitor subunit 1B	-1.59531	0.00862361
ENSMUSG00000031596.16	Slc7a2	solute carrier family 7 (cationic amino acid transporter, y+ system), member 2	1.02105	0.00897656
ENSMUSG00000020758.16	Itgb4	integrin beta 4	2.40044	0.00898473
ENSMUSG00000017718.16	Afmid	arylformamidase	0.917388	0.00903545
ENSMUSG00000076437.12	Selenoh	selenoprotein H	0.972455	0.0092207
ENSMUSG00000025498.16	Irf7	interferon regulatory factor 7	1.10364	0.00933391
ENSMUSG00000027676.12	Ccdc39	coiled-coil domain containing 39	0.886505	0.00934698
ENSMUSG00000008489.19	Elavl2	ELAV like RNA binding protein 1	0.852674	0.0094477
ENSMUSG00000018822.8	Sfrp5	secreted frizzled-related sequence protein 5	-1.62369	0.00958521
ENSMUSG00000037977.7	6430571L13Rik	RIKEN cDNA 6430571L13 gene	-0.982072	0.00985266
ENSMUSG00000062248.6	Cks2	CDC28 protein kinase regulatory subunit 2	0.972188	0.00987698
ENSMUSG00000027932.15	Slc27a3	solute carrier family 27 (fatty acid transporter), member 3	0.851541	0.00997125
ENSMUSG00000028527.19	Ak4	adenylate kinase 4	0.812386	0.00999687
ENSMUSG00000047822.9	Angptl8	angiopoietin-like 8	-1.59654	0.010197
ENSMUSG00000064202.16	Spata6l	spermatogenesis associated 6 like	-0.986617	0.0103094
ENSMUSG00000038508.8	Gdf15	growth differentiation factor 15	-1.35239	0.01032
ENSMUSG00000041000.9	Trim62	tripartite motif-containing 62	1.32412	0.0104959
ENSMUSG00000036523.17	Greb1	gene regulated by estrogen in breast cancer protein	-1.00402	0.0105711
ENSMUSG00000027954.10	Efna1	ephrin A1	0.954097	0.0107262
ENSMUSG00000040740.8	Slc25a34	solute carrier family 25, member 34	-1.11289	0.0107819
ENSMUSG00000038011.16	Dnah10	dynein, axonemal, heavy chain 10	-1.1062	0.0108822
ENSMUSG00000030683.12	Sez6l2	seizure related 6 homolog like 2	-0.842879	0.0108831
ENSMUSG00000079259.3	Trim71	tripartite motif-containing 71	0.989654	0.0109236
ENSMUSG00000043015.16	Nemp2	nuclear envelope integral membrane protein 2	1.21956	0.0109931
ENSMUSG00000049687.6	Pheta2	PH domain containing endocytic trafficking adaptor 2	0.881039	0.0110378
ENSMUSG00000059540.16	Tcea2	transcription elongation factor A (SII), 2	0.822696	0.0111195
ENSMUSG00000030739.19	Myh14	myosin, heavy polypeptide 14	-1.53121	0.0111898
ENSMUSG00000047420.9	Fam180a	family with sequence similarity 180, member A	2.14214	0.0112174
ENSMUSG00000038663.8	Fsd2	fibronectin type III and SPRY domain containing 2	-1.05504	0.0112504
ENSMUSG00000044916.11	1700029I15Rik	RIKEN cDNA 1700029I15 gene	-0.90449	0.0112678
ENSMUSG00000049036.8	Tmem121	transmembrane protein 121	0.869077	0.0113314
ENSMUSG00000028289.13	Epha7	Eph receptor A7	1.3805	0.0113704
ENSMUSG00000026414.14	Tnnt2	troponin T2, cardiac	2.49472	0.0115012
ENSMUSG00000028873.17	Cdca8	cell division cycle associated 8	1.00627	0.0116174
ENSMUSG00000036860.15	Mrpl55	mitochondrial ribosomal protein L55	-0.83352	0.0116554
ENSMUSG00000054256.12	Msi1	musashi RNA-binding protein 1	1.26972	0.0116948
ENSMUSG00000018509.9	Cenpv	centromere protein V	-1.03019	0.0117987
ENSMUSG00000020788.16	Atp2a3	ATPase, Ca++ transporting, ubiquitous	-1.80107	0.0118682
ENSMUSG00000023064.5	Sncg	synuclein, gamma	-1.42475	0.0120976
ENSMUSG00000050132.14	Sarm1	sterile alpha and HEAT/Armadillo motif containing 1	0.954192	0.0121087
ENSMUSG00000035131.15	Brinp3	bone morphogenetic protein/retinoic acid inducible neural specific 3	0.918715	0.0122325
ENSMUSG00000042258.14	Isl1	ISL1 transcription factor, LIM/homeodomain	1.67435	0.0123702
ENSMUSG00000031262.13	Cenpi	centromere protein I	0.858082	0.012644
ENSMUSG00000031133.13	Arhgef6	Rac/Cdc42 guanine nucleotide exchange factor (GEF) 6	0.910806	0.0128243
ENSMUSG00000026479.14	Lamc2	laminin, gamma 2	-1.22603	0.0128945
ENSMUSG00000043541.17	Casc1	cancer susceptibility candidate 1	1.367	0.012951
ENSMUSG00000033276.19	Stk36	serine/threonine kinase 36	0.818432	0.0129708
ENSMUSG00000040963.16	Asgr2	asialoglycoprotein receptor 2	-2.01397	0.0131196
ENSMUSG00000042182.17	Bend6	BEN domain containing 6	1.57545	0.0134855
ENSMUSG00000032487.9	Ptgs2	prostaglandin-endoperoxide synthase 2	1.34561	0.0134908
ENSMUSG00000037336.15	Mfsd2b	major facilitator superfamily domain containing 2B	2.25012	0.0138444
ENSMUSG00000029591.15	Ung	uracil DNA glycosylase	-0.819545	0.0138599
ENSMUSG00000041481.18	Serpina3g	serine (or cysteine) peptidase inhibitor, clade A, member 3G	1.16898	0.0139189
ENSMUSG00000078942.11	Naip6	NLR family, apoptosis inhibitory protein 6	0.927862	0.0139201
ENSMUSG00000035683.14	Melk	maternal embryonic leucine zipper kinase	1.23477	0.0139416
ENSMUSG00000024621.17	Csf1r	colony stimulating factor 1 receptor	1.87844	0.0142083
ENSMUSG00000024912.7	Fosl1	fos-like antigen 1	1.49736	0.0144067
ENSMUSG00000063428.9	Ddo	D-aspartate oxidase	-1.16149	0.0144263
ENSMUSG00000050761.5	Gp1bb	glycoprotein Ib, beta polypeptide	1.50604	0.0147628
ENSMUSG00000056671.8	Prelid2	PRELI domain containing 2	1.06647	0.0148931
ENSMUSG00000066800.12	Rnasel	ribonuclease L (2', 5'-oligoisoadenylate synthetase-dependent)	0.915741	0.0149542
ENSMUSG00000068696.7	Gpr88	G-protein coupled receptor 88	1.48525	0.014985
ENSMUSG00000027460.8	Angpt4	angiopoietin 4	0.906444	0.0150193
ENSMUSG00000052512.18	Nav2	neuron navigator 2	1.41065	0.0151446
ENSMUSG00000087141.2	Plcxd2	phosphatidylinositol-specific phospholipase C, X domain containing 2	0.805659	0.0153583
ENSMUSG00000038264.9	Sema7a	sema domain, immunoglobulin domain (Ig), and GPI membrane anchor, (semaphorin) 7A	1.56393	0.0154259
ENSMUSG00000022383.14	Ppara	peroxisome proliferator activated receptor alpha	-1.40041	0.0156975
ENSMUSG00000069184.5	Zfp72	zinc finger protein 72	0.895236	0.0160992
ENSMUSG00000054072.13	Iigp1	interferon inducible GTPase 1	0.958888	0.0162206
ENSMUSG00000044646.16	Zbtb7c	zinc finger and BTB domain containing 7C	0.820634	0.0163298
ENSMUSG00000023913.18	Pla2g7	phospholipase A2, group VII (platelet-activating factor acetylhydrolase, plasma)	1.18444	0.0163533
ENSMUSG00000053279.9	Aldh1a1	aldehyde dehydrogenase family 1, subfamily A1	-0.8324	0.0165665
ENSMUSG00000028444.18	Cntfr	ciliary neurotrophic factor receptor	1.84329	0.0166304
ENSMUSG00000037621.9	Atoh8	atonal bHLH transcription factor 8	0.865795	0.0167264
ENSMUSG00000054871.6	Tmem158	transmembrane protein 158	0.971685	0.016951
ENSMUSG00000048368.10	Omd	osteomodulin	1.72514	0.0170624
ENSMUSG00000029177.10	Cenpa	centromere protein A	0.849778	0.017254
ENSMUSG00000072620.4	Slfn2	schlafen 2	-0.800485	0.0173257
ENSMUSG00000050394.15	Armcx6	armadillo repeat containing, X-linked 6	1.16649	0.0173951
ENSMUSG00000003271.18	Sult2b1	sulfotransferase family, cytosolic, 2B, member 1	-2.03779	0.0175953
ENSMUSG00000026110.16	Mgat4a	mannoside acetylglucosaminyltransferase 4, isoenzyme A	-1.70007	0.0176238
ENSMUSG00000035202.9	Lars2	leucyl-tRNA synthetase, mitochondrial	1.28633	0.0179059
ENSMUSG00000039187.17	Fanci	Fanconi anemia, complementation group I	1.23335	0.0180089
ENSMUSG00000022096.15	Hr	lysine demethylase and nuclear receptor corepressor	-0.902404	0.0180848
ENSMUSG00000020010.8	Vnn3	vanin 3	-0.953047	0.0181766
ENSMUSG00000036452.19	Arhgap26	Rho GTPase activating protein 26	-0.826923	0.0182976
ENSMUSG00000096727.4	Psmb9	proteasome (prosome, macropain) subunit, beta type 9 (large multifunctional peptidase 2)	1.44378	0.0184442
ENSMUSG00000020227.11	Irak3	interleukin-1 receptor-associated kinase 3	1.25958	0.0185071
ENSMUSG00000047528.14	Flacc1	flagellum associated containing coiled-coil domains 1	-1.31943	0.018515
ENSMUSG00000038552.15	Fndc4	fibronectin type III domain containing 4	0.884426	0.0185852
ENSMUSG00000025855.14	Prkar1b	protein kinase, cAMP dependent regulatory, type I beta	-3.08546	0.0186493
ENSMUSG00000022945.13	Chaf1b	chromatin assembly factor 1, subunit B (p60)	1.05548	0.0187854
ENSMUSG00000043298.9	Smco3	single-pass membrane protein with coiled-coil domains 3	1.28436	0.0189336
ENSMUSG00000006205.14	Htra1	HtrA serine peptidase 1	2.26991	0.0190448
ENSMUSG00000035509.18	Fbxl21	F-box and leucine-rich repeat protein 21	1.18245	0.0191325
ENSMUSG00000028167.16	Bdh2	3-hydroxybutyrate dehydrogenase, type 2	0.970152	0.0191482
ENSMUSG00000047686.10	Rtl3	retrotransposon Gag like 3	2.62998	0.0195668
ENSMUSG00000050122.20	Vwa3b	von Willebrand factor A domain containing 3B	2.62772	0.0197218
ENSMUSG00000109293.2	Dcst2	DC-STAMP domain containing 2	-1.67751	0.0197302
ENSMUSG00000042109.9	Csdc2	cold shock domain containing C2, RNA binding	1.4653	0.0199374
ENSMUSG00000021991.10	Cacna2d3	calcium channel, voltage-dependent, alpha2/delta subunit 3	-2.60112	0.0200676
ENSMUSG00000028931.13	Kcnab2	potassium voltage-gated channel, shaker-related subfamily, beta member 2	1.01498	0.0204998
ENSMUSG00000040428.20	Plekha4	pleckstrin homology domain containing, family A (phosphoinositide binding specific) member 4	1.11011	0.0205554
ENSMUSG00000018920.12	Cxcl16	chemokine (C-X-C motif) ligand 16	1.42502	0.0211379
ENSMUSG00000053687.16	Dpep2	dipeptidase 2	1.88524	0.0217714
ENSMUSG00000025574.14	Tk1	thymidine kinase 1	0.850169	0.0219633
ENSMUSG00000074604.10	Mgst2	microsomal glutathione S-transferase 2	-0.87546	0.0220148
ENSMUSG00000079450.12	Cldn34c1	claudin 34C1	0.882177	0.022174
ENSMUSG00000030677.9	Kif22	kinesin family member 22	0.835719	0.0222207
ENSMUSG00000058900.6	Rsl1	regulator of sex limited protein 1	0.854418	0.0222309
ENSMUSG00000023224.13	Serping1	serine (or cysteine) peptidase inhibitor, clade G, member 1	1.27516	0.0222323
ENSMUSG00000068245.15	Phf11d	PHD finger protein 11D	1.05257	0.0223172
ENSMUSG00000025064.16	Col17a1	collagen, type XVII, alpha 1	1.49229	0.0223296
ENSMUSG00000026779.7	Mastl	microtubule associated serine/threonine kinase-like	0.953795	0.0223831
ENSMUSG00000021418.16	Rpp40	ribonuclease P 40 subunit	-0.843538	0.0226117
ENSMUSG00000020676.3	Ccl11	chemokine (C-C motif) ligand 11	1.52605	0.0226591
ENSMUSG00000040280.11	Ndufa4l2	Ndufa4, mitochondrial complex associated like 2	2.21621	0.0226647
ENSMUSG00000073077.8	Cfap47	cilia and flagella associated protein 47	0.997718	0.0227269
ENSMUSG00000023999.15	Kif6	kinesin family member 6	1.13854	0.0232157
ENSMUSG00000029875.6	Ccdc184	coiled-coil domain containing 184	1.32767	0.0235014
ENSMUSG00000075012.5	Fjx1	four jointed box 1	-0.977567	0.023618
ENSMUSG00000040420.16	Cdh18	cadherin 18	1.14415	0.0236465
ENSMUSG00000017697.4	Ada	adenosine deaminase	1.11296	0.023821
ENSMUSG00000019992.9	Mtfr2	mitochondrial fission regulator 2	1.76905	0.0239042
ENSMUSG00000031079.13	Zfp300	zinc finger protein 300	0.877012	0.0239703
ENSMUSG00000047591.6	Mafa	v-maf musculoaponeurotic fibrosarcoma oncogene family, protein A (avian)	2.46605	0.0240133
ENSMUSG00000022144.5	Gdnf	glial cell line derived neurotrophic factor	1.1729	0.0244397
ENSMUSG00000043088.17	Il17re	interleukin 17 receptor E	-1.03112	0.0245397
ENSMUSG00000010651.5	Acaa1b	acetyl-Coenzyme A acyltransferase 1B	-1.11373	0.0247614
ENSMUSG00000060402.9	Chst8	carbohydrate sulfotransferase 8	1.68559	0.0248435
ENSMUSG00000003354.7	Ccdc65	coiled-coil domain containing 65	1.83142	0.0252013
ENSMUSG00000034818.18	Celf5	CUGBP, Elav-like family member 5	1.01007	0.0252724
ENSMUSG00000017724.15	Etv4	ets variant 4	2.22084	0.0261298
ENSMUSG00000057606.15	Colq	collagen-like tail subunit (single strand of homotrimer) of asymmetric acetylcholinesterase	2.13707	0.0263252
ENSMUSG00000032783.10	Troap	trophinin associated protein	1.59264	0.0264709
ENSMUSG00000035365.16	Parpbp	PARP1 binding protein	1.10659	0.0264831
ENSMUSG00000020778.13	Ten1	TEN1 telomerase capping complex subunit	0.851431	0.026684
ENSMUSG00000078503.10	Zfp990	zinc finger protein 990	1.23109	0.0268151
ENSMUSG00000042604.6	Kcna4	potassium voltage-gated channel, shaker-related subfamily, member 4	1.87798	0.0269759
ENSMUSG00000078922.10	Tgtp1	T cell specific GTPase 1	1.81594	0.0270695
ENSMUSG00000078137.2	Ankrd63	ankyrin repeat domain 63	-1.171	0.0275202
ENSMUSG00000012187.14	Mogat1	monoacylglycerol O-acyltransferase 1	-1.29243	0.0275963
ENSMUSG00000024810.17	Il33	interleukin 33	1.15463	0.027644
ENSMUSG00000021130.9	Galnt16	polypeptide N-acetylgalactosaminyltransferase 16	2.66872	0.0276528
ENSMUSG00000039985.15	Sinhcaf	SIN3-HDAC complex associated factor	0.873794	0.0279381
ENSMUSG00000020635.9	Fkbp1b	FK506 binding protein 1b	1.20143	0.0284335
ENSMUSG00000039099.8	Wdr93	WD repeat domain 93	-0.830877	0.0285947
ENSMUSG00000036411.11	9530077C05Rik	RIKEN cDNA 9530077C05 gene	1.24172	0.0289451
ENSMUSG00000028159.15	Dapp1	dual adaptor for phosphotyrosine and 3-phosphoinositides 1	1.02326	0.0297677
ENSMUSG00000069265.3	H3c1	H3 clustered histone 1	1.09805	0.0304337
ENSMUSG00000020363.7	Gfpt2	glutamine fructose-6-phosphate transaminase 2	0.824971	0.0305201
ENSMUSG00000020808.4	Pimreg	PICALM interacting mitotic regulator	1.05142	0.0306365
ENSMUSG00000042401.9	Crtac1	cartilage acidic protein 1	-2.28345	0.0309302
ENSMUSG00000001604.15	Tcea3	transcription elongation factor A (SII), 3	1.07589	0.0316874
ENSMUSG00000024989.16	Cep55	centrosomal protein 55	0.993976	0.0318621
ENSMUSG00000061991.3	H2ac10	H2A clustered histone 10	1.68762	0.0320411
ENSMUSG00000032179.8	Bmp5	bone morphogenetic protein 5	1.95918	0.0323337
ENSMUSG00000038354.14	Ankrd35	ankyrin repeat domain 35	-1.00225	0.0324849
ENSMUSG00000091387.3	Gcnt4	glucosaminyl (N-acetyl) transferase 4, core 2 (beta-1,6-N-acetylglucosaminyltransferase)	0.96437	0.0329222
ENSMUSG00000000632.14	Sez6	seizure related gene 6	2.53539	0.0329804
ENSMUSG00000005045.17	Chd5	chromodomain helicase DNA binding protein 5	2.44691	0.0331974
ENSMUSG00000078144.5	Capns2	calpain, small subunit 2	1.13029	0.0333797
ENSMUSG00000074500.12	Zfp558	zinc finger protein 558	0.816358	0.0334243
ENSMUSG00000045062.5	Pcdhb7	protocadherin beta 7	0.868996	0.0334453
ENSMUSG00000072115.12	Ang	angiogenin, ribonuclease, RNase A family, 5	1.53721	0.0339334
ENSMUSG00000006731.11	B4galnt1	beta-1,4-N-acetyl-galactosaminyl transferase 1	0.973101	0.033955
ENSMUSG00000042606.10	Hirip3	HIRA interacting protein 3	0.846119	0.0341006
ENSMUSG00000048442.16	Smim5	small integral membrane protein 5	-1.64067	0.0341524
ENSMUSG00000067199.5	Frat1	frequently rearranged in advanced T cell lymphomas	-1.17392	0.0342496
ENSMUSG00000068246.7	Apol9b	apolipoprotein L 9b	1.40632	0.0347396
ENSMUSG00000032595.11	Cdhr4	cadherin-related family member 4	1.2777	0.0350436
ENSMUSG00000015083.12	C8g	complement component 8, gamma polypeptide	-0.824874	0.0353513
ENSMUSG00000046733.8	Gprc5a	G protein-coupled receptor, family C, group 5, member A	1.49514	0.0356252
ENSMUSG00000020648.4	Dus4l	dihydrouridine synthase 4-like (S. cerevisiae)	-0.85015	0.0357838
ENSMUSG00000052384.15	Nrros	negative regulator of reactive oxygen species	2.21041	0.0360317
ENSMUSG00000027408.8	Cpxm1	carboxypeptidase X 1 (M14 family)	2.12513	0.0362442
ENSMUSG00000008193.14	Spib	Spi-B transcription factor (Spi-1/PU.1 related)	1.1757	0.0364361
ENSMUSG00000039396.12	Neil3	nei like 3 (E. coli)	0.98278	0.0373395
ENSMUSG00000040502.6	Marchf9	membrane associated ring-CH-type finger 9	0.882173	0.0375659
ENSMUSG00000068323.13	Slc4a5	solute carrier family 4, sodium bicarbonate cotransporter, member 5	-2.0305	0.0384715
ENSMUSG00000054951.4	9130008F23Rik	RIKEN cDNA 9130008F23 gene	0.88287	0.0385262
ENSMUSG00000028613.16	Lrp8	low density lipoprotein receptor-related protein 8, apolipoprotein e receptor	1.63961	0.0387405
ENSMUSG00000035694.16	Caps2	calcyphosphine 2	1.36407	0.0390867
ENSMUSG00000050014.9	Apol10b	apolipoprotein L 10B	1.0381	0.0396214
ENSMUSG00000018554.14	Ybx2	Y box protein 2	-1.45072	0.0400495
ENSMUSG00000000791.10	Il12rb1	interleukin 12 receptor, beta 1	2.35843	0.0402866
ENSMUSG00000068962.8	Zfp114	zinc finger protein 114	1.0199	0.0404365
ENSMUSG00000052105.18	Mtcl1	microtubule crosslinking factor 1	1.10237	0.0406198
ENSMUSG00000017400.11	Stac2	SH3 and cysteine rich domain 2	1.68732	0.0408844
ENSMUSG00000027931.13	Npr1	natriuretic peptide receptor 1	-0.829985	0.0408964
ENSMUSG00000049097.10	Ankrd34a	ankyrin repeat domain 34A	1.37011	0.0415415
ENSMUSG00000108900.2	Ccdc194	coiled-coil domain containing 194	2.12483	0.0420326
ENSMUSG00000004891.17	Nes	nestin	1.78648	0.0421953
ENSMUSG00000063245.12	Zfp993	zinc finger protein 993	0.819864	0.0423254
ENSMUSG00000045273.9	Cenph	centromere protein H	1.12975	0.0424317
ENSMUSG00000027318.18	Adam33	a disintegrin and metallopeptidase domain 33	0.870181	0.0430529
ENSMUSG00000032946.17	Rasgrp2	RAS, guanyl releasing protein 2	-1.18968	0.0430725
ENSMUSG00000079685.11	Ulbp1	UL16 binding protein 1	0.936805	0.0436608
ENSMUSG00000084845.10	Tmem240	transmembrane protein 240	0.846367	0.0437052
ENSMUSG00000044041.5	Krt13	keratin 13	-1.5477	0.0445055
ENSMUSG00000032186.16	Tmod2	tropomodulin 2	1.14397	0.0446975
ENSMUSG00000000318.17	Clec10a	C-type lectin domain family 10, member A	-1.53823	0.0451622
ENSMUSG00000023886.11	Smoc2	SPARC related modular calcium binding 2	1.25147	0.0451669
ENSMUSG00000004113.19	Cacna1b	calcium channel, voltage-dependent, N type, alpha 1B subunit	0.849263	0.0452585
ENSMUSG00000020541.13	Tom1l1	target of myb1-like 1 (chicken)	1.22092	0.0454139
ENSMUSG00000044362.9	Ccdc89	coiled-coil domain containing 89	2.11687	0.0454876
ENSMUSG00000025272.17	Tro	trophinin	1.01954	0.0455374
ENSMUSG00000025194.6	Abcc2	ATP-binding cassette, sub-family C (CFTR/MRP), member 2	-1.04213	0.0458762
ENSMUSG00000069670.9	Nkain2	Na+/K+ transporting ATPase interacting 2	1.85701	0.0459839
ENSMUSG00000027173.8	Depdc7	DEP domain containing 7	-1.13641	0.0462448
ENSMUSG00000118607.2	Gm7592	predicted gene 7592	0.863311	0.0463482
ENSMUSG00000020785.18	Camkk1	calcium/calmodulin-dependent protein kinase kinase 1, alpha	0.830524	0.0469702
ENSMUSG00000032174.6	Icam5	intercellular adhesion molecule 5, telencephalin	0.91703	0.0471466
ENSMUSG00000020897.13	Aurkb	aurora kinase B	0.924543	0.0472175
ENSMUSG00000038327.9	Serpinb9f	serine (or cysteine) peptidase inhibitor, clade B, member 9f	-2.05036	0.0474183
ENSMUSG00000023032.13	Slc4a8	solute carrier family 4 (anion exchanger), member 8	1.12926	0.0475196
ENSMUSG00000038543.14	BC028528	cDNA sequence BC028528	0.959718	0.0477387
ENSMUSG00000078773.12	Rad54b	RAD54 homolog B (S. cerevisiae)	1.19265	0.0485358
ENSMUSG00000071042.13	Rasgrp3	RAS, guanyl releasing protein 3	-0.932796	0.0485413
ENSMUSG00000029862.17	Clcn1	chloride channel, voltage-sensitive 1	1.72874	0.0486425
ENSMUSG00000070524.2	Fcrlb	Fc receptor-like B	1.61154	0.0489312
ENSMUSG00000036882.8	Arhgap33	Rho GTPase activating protein 33	1.23978	0.0489793
ENSMUSG00000043155.5	Hpdl	4-hydroxyphenylpyruvate dioxygenase-like	-0.928366	0.0497484
ENSMUSG00000028518.9	Prkaa2	protein kinase, AMP-activated, alpha 2 catalytic subunit	-0.806242	0.0497904
ENSMUSG00000024301.11	Kifc5b	kinesin family member C5B	0.948087	0.0498748
