# Supplementary material for: Human dental pulp stem cell-derived exosomes inhibit adipogenesis and obesity by activating Wnt/β-catenin signaling
Source: Research Square preprint supplement (doi:10.21203/rs.3.rs-8023093/v1), 2025-12-14
Supplement: Supplementary file 2 [file c6e1aedf67439eec9cdc94d3.xlsx]

## Sheet: Sheet1
Proteomic profiles in hDPSC-Exos
Gene name	Accession number	Protein description	hDPSC_Exo/hDPSCs ratio	Quantification P-value
ANTXR1	A0A7P0T9B0	Anthrax toxin receptor 1 (Fragment)	6.64	0.00161202
C1R	B4DPQ0	Complement subcomponent C1r	6.64	1.48421e-06
C1S	P09871	Complement C1s subcomponent	6.64	2.38171e-06
CARD14	I3L3F1	Caspase recruitment domain-containing protein 14 (Fragment)	6.64	0.000469345
COL24A1	Q17RW2	Collagen alpha-1(XXIV) chain	6.64	0.000818382
DDX51	Q8N8A6	ATP-dependent RNA helicase DDX51	6.64	0.00147481
FBLN5	G3V4U0	Fibulin-5	6.64	0.000338562
FLT1	P17948	Vascular endothelial growth factor receptor 1	6.64	6.45545e-06
LGALS3BP	Q08380	Galectin-3-binding protein	6.64	0.0111858
MMP2	P08253	72 kDa type IV collagenase	6.64	2.17867e-05
PLEKHG4B	Q96PX9	Pleckstrin homology domain-containing family G member 4B	6.64	0.00042043
SERPINF1	P36955	Pigment epithelium-derived factor	6.64	0.000209442
STC2	O76061	Stanniocalcin-2	6.64	2.32017e-06
TGFBI	Q15582	Transforming growth factor-beta-induced protein ig-h3	6.64	0.00161475
TIMP2	P16035	Metalloproteinase inhibitor 2	6.64	0.000578523
COL27A1	Q8IZC6	Collagen alpha-1(XXVII) chain	6.58	0.000190262
CLU	P10909	Clusterin	6.33	0.00188016
COL1A2	P08123	Collagen alpha-2(I) chain	6.25	0.00189301
QSOX1	O00391	Sulfhydryl oxidase 1	6.23	9.92213e-05
GLRX5	Q86SX6	Glutaredoxin-related protein 5, mitochondrial	6.11	0.00457704
BGN	P21810	Biglycan	5.94	0.0013458
FBLN1	P23142	Fibulin-1	5.93	0.00069983
CLEC11A	Q9Y240	C-type lectin domain family 11 member A	5.89	4.19493e-05
MRPS26	Q9BYN8	28S ribosomal protein S26, mitochondrial	5.82	0.000674298
DCN	P07585	Decorin	5.77	3.15065e-08
PCOLCE	Q15113	Procollagen C-endopeptidase enhancer 1	5.7	5.89036e-05
COL5A2	P05997	Collagen alpha-2(V) chain	5.64	0.000108095
LAMA4	A0A0A0MTC7	Laminin subunit alpha-4	5.61	4.28452e-05
MASP1	P48740-2	Isoform 2 of Mannan-binding lectin serine protease 1	5.58	0.0040041
FER1L4	A9Z1Z3	Fer-1-like protein 4	5.57	0.0120255
SLC29A1	Q99808	Equilibrative nucleoside transporter 1	5.56	0.00408141
RSF1	Q96T23	Remodeling and spacing factor 1	5.54	0.00172433
TIMP1	P01033	Metalloproteinase inhibitor 1	5.48	0.00412767
PRSS3	P35030	Trypsin-3	5.47	0.00269408
SFRP1	Q8N474	Secreted frizzled-related protein 1	5.47	0.00377777
COL4A5	P29400	Collagen alpha-5(IV) chain	5.45	0.0393149
ADGRA2	Q96PE1	Adhesion G protein-coupled receptor A2	5.44	8.21765e-05
NID1	P14543	Nidogen-1	5.39	9.08734e-05
LAMC1	P11047	Laminin subunit gamma-1	5.32	0.00117981
SDC1	P18827	Syndecan-1	5.29	0.0083944
CLSTN1	O94985-2	Isoform 2 of Calsyntenin-1	5.23	0.00335606
OLFML3	Q9NRN5	Olfactomedin-like protein 3	5.19	0.000440281
EXT1	Q16394	Exostosin-1	5.16	0.00152831
COL3A1	P02461	Collagen alpha-1(III) chain	5.14	0.000595243
EFEMP2	O95967	EGF-containing fibulin-like extracellular matrix protein 2	5.01	0.00104831
COL1A1	P02452	Collagen alpha-1(I) chain	4.98	2.30317e-05
CST3	P01034	Cystatin-C	4.96	0.0331226
COL7A1	Q02388	Collagen alpha-1(VII) chain	4.93	1.5067e-05
IGFBP5	C9JXX4	Insulin-like growth factor-binding protein 5 (Fragment)	4.88	0.0212682
SDCBP	O00560	Syntenin-1	4.85	0.000490492
CCBE1	Q6UXH8	Collagen and calcium-binding EGF domain-containing protein 1	4.79	0.00332873
PDGFD	Q9GZP0	Platelet-derived growth factor D	4.77	6.84383e-05
COL4A3	Q01955	Collagen alpha-3(IV) chain	4.76	0.00105373
ANGPT1	Q15389	Angiopoietin-1	4.73	0.00430339
CFH	P08603	Complement factor H	4.71	5.87515e-05
COL4A1	P02462	Collagen alpha-1(IV) chain	4.71	0.000451829
MGAT5	Q09328	Alpha-1,6-mannosylglycoprotein 6-beta-N-acetylglucosaminyltransferase A	4.71	0.00169403
LAMB1	P07942	Laminin subunit beta-1	4.67	0.000578766
RAB23	Q9ULC3	Ras-related protein Rab-23	4.63	0.00649915
INHBA	P08476	Inhibin beta A chain	4.53	0.00701224
COL2A1	P02458	Collagen alpha-1(II) chain	4.49	0.00123833
FST	P19883	Follistatin	4.48	0.00124538
SNED1	Q8TER0	Sushi, nidogen and EGF-like domain-containing protein 1	4.39	0.00737124
SVEP1	Q4LDE5	Sushi, von Willebrand factor type A, EGF and pentraxin domain-containing protein 1	4.38	0.00679907
EXT2	Q93063	Exostosin-2	4.35	0.00188727
COL16A1	Q07092	Collagen alpha-1(XVI) chain	4.34	0.00039933
KCNH2	Q12809	Potassium voltage-gated channel subfamily H member 2	4.32	1.70962e-07
TGFB2	P61812	Transforming growth factor beta-2 proprotein	4.31	0.0028543
BICC1	Q9H694	Protein bicaudal C homolog 1	4.3	0.0100011
VPS41	C9JU58	Vacuolar protein sorting-associated protein 41 homolog (Fragment)	4.29	0.00558782
GAK	O14976	Cyclin-G-associated kinase	4.27	0.00525113
C1QTNF1	Q9BXJ1	Complement C1q tumor necrosis factor-related protein 1	4.25	0.00360708
LTBP1	Q14766	Latent-transforming growth factor beta-binding protein 1	4.24	0.00415418
SMARCD3	Q6STE5	SWI/SNF-related matrix-associated actin-dependent regulator of chromatin subfamily D member 3	4.24	0.00311408
ITGBL1	O95965	Integrin beta-like protein 1	4.19	0.00733059
GALC	P54803	Galactocerebrosidase	4.16	0.000122689
KRT78	Q8N1N4	Keratin, type II cytoskeletal 78	4.15	0.00544743
LTBR	P36941	Tumor necrosis factor receptor superfamily member 3	4.15	0.038392
PTX3	P26022	Pentraxin-related protein PTX3	4.12	0.0269619
PAM	A0A8C8KD64	Peptidyl-glycine alpha-amidating monooxygenase	4.09	0.000609015
MFAP2	P55001	Microfibrillar-associated protein 2	4.08	0.000535977
APOH	J3KS17	Beta-2-glycoprotein 1 (Fragment)	4.03	0.0305005
PAMR1	Q6UXH9	Inactive serine protease PAMR1	3.98	0.0221698
AGRN	O00468-6	Isoform 6 of Agrin	3.9	0.000122148
TNFAIP6	P98066	Tumor necrosis factor-inducible gene 6 protein	3.89	0.00693323
GAS6	Q14393	Growth arrest-specific protein 6	3.88	0.000195173
FGFR1	A0A3B3ISD1	Fibroblast growth factor receptor	3.84	0.00238914
FN1	P02751	Fibronectin	3.83	0.00261053
HTRA1	Q92743	Serine protease HTRA1	3.81	0.00289386
GNPTG	H0YEA7	N-acetylglucosamine-1-phosphotransferase subunit gamma	3.8	0.0109442
PXDN	Q92626	Peroxidasin homolog	3.78	0.00117556
SERPINE1	P05121	Plasminogen activator inhibitor 1	3.77	0.0291302
POSTN	Q15063	Periostin	3.71	0.00110706
LAMA2	P24043	Laminin subunit alpha-2	3.7	0.021572
COL14A1	Q05707	Collagen alpha-1(XIV) chain	3.67	0.000140188
SHC2	P98077	SHC-transforming protein 2	3.66	0.0190807
AEBP1	Q8IUX7	Adipocyte enhancer-binding protein 1	3.65	2.82038e-05
FBN2	P35556	Fibrillin-2	3.65	0.0159729
EDIL3	O43854	EGF-like repeat and discoidin I-like domain-containing protein 3	3.64	0.000243952
EXOC6B	Q9Y2D4	Exocyst complex component 6B	3.63	0.000214566
EFEMP1	Q12805	EGF-containing fibulin-like extracellular matrix protein 1	3.6	0.00764747
HAPLN1	P10915	Hyaluronan and proteoglycan link protein 1	3.6	0.00254989
PLTP	P55058	Phospholipid transfer protein	3.6	0.000218537
TGFB1	P01137	Transforming growth factor beta-1 proprotein	3.6	0.000187918
C4B	A0A0G2JL54	Complement C4-B	3.58	0.0495967
NID2	Q14112	Nidogen-2	3.58	5.98842e-05
ITGA9	E9PDS3	Integrin alpha-9	3.55	0.00802083
LUM	P51884	Lumican	3.54	0.00961676
LTBP2	Q14767	Latent-transforming growth factor beta-binding protein 2	3.51	0.00981456
SEMA5A	Q13591	Semaphorin-5A	3.49	0.00038432
MYO6	A0A0A0MRM8	Unconventional myosin-6	3.48	0.000908213
PTPRS	Q13332	Receptor-type tyrosine-protein phosphatase S	3.48	0.000130051
ITIH2	P19823	Inter-alpha-trypsin inhibitor heavy chain H2	3.47	0.00146039
MMP11	P24347	Stromelysin-3	3.45	0.0467111
APP	P05067	Amyloid-beta precursor protein	3.42	0.00527855
VTN	P04004	Vitronectin	3.42	0.000411487
THBS3	P49746	Thrombospondin-3	3.41	8.07033e-05
MXRA5	Q9NR99	Matrix-remodeling-associated protein 5	3.4	8.51453e-06
PPM1F	P49593	Protein phosphatase 1F	3.4	0.00719641
COL6A3	P12111	Collagen alpha-3(VI) chain	3.37	7.24067e-05
LTBP4	Q8N2S1-2	Isoform 2 of Latent-transforming growth factor beta-binding protein 4	3.37	0.00591424
FAM20C	Q8IXL6	Extracellular serine/threonine protein kinase FAM20C	3.36	0.0415567
CXCL12	P48061	Stromal cell-derived factor 1	3.34	0.00270216
LAMA5	O15230	Laminin subunit alpha-5	3.33	0.0303621
ABI3BP	H7C556	Target of Nesh-SH3	3.31	0.0125161
COL6A2	P12110	Collagen alpha-2(VI) chain	3.31	0.000126549
ITGA8	P53708	Integrin alpha-8	3.31	0.00171156
LOXL3	P58215	Lysyl oxidase homolog 3	3.28	0.0013182
PRSS23	O95084	Serine protease 23	3.28	0.0174451
NOTCH3	Q9UM47	Neurogenic locus notch homolog protein 3	3.26	0.00213195
PPP1R9B	Q96SB3	Neurabin-2	3.25	0.0149116
TNC	P24821	Tenascin	3.25	0.00153403
FBN1	P35555	Fibrillin-1	3.23	0.00883471
TMEM70	Q9BUB7	Transmembrane protein 70, mitochondrial	3.22	0.00151612
COL5A3	P25940	Collagen alpha-3(V) chain	3.18	0.00136191
SEMA3A	Q14563	Semaphorin-3A	3.17	0.0263186
HMCN1	Q96RW7	Hemicentin-1	3.12	0.00678873
TFPI	P10646	Tissue factor pathway inhibitor	3.09	0.0340317
COL6A1	P12109	Collagen alpha-1(VI) chain	3.07	0.000394041
NDUFA4	O00483	Cytochrome c oxidase subunit NDUFA4	3.05	0.00294581
VCAN	P13611	Versican core protein	3.05	0.0318188
C5	P01031	Complement C5	3.01	0.00325018
SRPX	P78539	Sushi repeat-containing protein SRPX	2.94	0.0214289
ADAMTSL1	A0A7P0T9B9	ADAMTS-like protein 1 (Fragment)	2.93	0.0288892
TNFRSF11B	O00300	Tumor necrosis factor receptor superfamily member 11B	2.91	0.0123704
SDC4	P31431	Syndecan-4	2.88	0.0067975
BMP1	P13497	Bone morphogenetic protein 1	2.82	0.00325179
STXBP1	P61764	Syntaxin-binding protein 1	2.81	0.000231068
B4GALT1	P15291	Beta-1,4-galactosyltransferase 1	2.8	0.00747513
METRNL	Q641Q3	Meteorin-like protein	2.8	0.013026
CD63	F8VWK8	Tetraspanin (Fragment)	2.77	0.039638
IGFBP4	P22692	Insulin-like growth factor-binding protein 4	2.74	0.0283664
C7	P10643	Complement component C7	2.7	0.0245112
COL18A1	P39060	Collagen alpha-1(XVIII) chain	2.7	0.00114193
FTL	P02792	Ferritin light chain	2.68	0.018986
PDGFRL	Q15198	Platelet-derived growth factor receptor-like protein	2.66	0.0178684
XYLT1	Q86Y38	Xylosyltransferase 1	2.66	0.00130944
NFASC	O94856	Neurofascin	2.64	0.00242174
SERPINE2	P07093	Glia-derived nexin	2.62	0.00598356
C4A	P0C0L4	Complement C4-A	2.58	0.0474298
PTN	P21246	Pleiotrophin	2.58	0.00197805
EMILIN1	Q9Y6C2	EMILIN-1	2.57	0.00778652
COL5A1	P20908	Collagen alpha-1(V) chain	2.48	0.00363117
PLOD1	Q02809	Procollagen-lysine,2-oxoglutarate 5-dioxygenase 1	2.46	0.000265832
ANGPTL2	Q9UKU9	Angiopoietin-related protein 2	2.43	0.00128908
PAPOLA	P51003	Poly(A) polymerase alpha	2.43	0.0158325
NRP2	O60462	Neuropilin-2	2.42	0.0488339
APOC3	P02656	Apolipoprotein C-III	2.4	0.0321774
CRNKL1	Q9BZJ0	Crooked neck-like protein 1	2.39	0.00393252
SPOCK1	Q08629	Testican-1	2.36	0.000867659
COL12A1	Q99715	Collagen alpha-1(XII) chain	2.35	0.00107889
LTBP3	Q9NS15	Latent-transforming growth factor beta-binding protein 3	2.33	0.0355161
SEMA3B	A0A0C4DGV8	Semaphorin-3B	2.19	0.00744007
CPSF2	Q9P2I0	Cleavage and polyadenylation specificity factor subunit 2	2.16	0.019196
FTH1	E9PKY7	Ferritin (Fragment)	2.16	0.0121401
CCDC93	F8W9X7	Coiled-coil domain-containing protein 93	2.13	0.0417257
EVA1B	Q9NVM1	Protein eva-1 homolog B	2.11	0.0230139
LOXL2	Q9Y4K0	Lysyl oxidase homolog 2	2.11	0.00100029
SH2D4A	Q9H788	SH2 domain-containing protein 4A	2.11	0.00250922
FSTL1	Q12841	Follistatin-related protein 1	2.09	0.0414488
DST	F8W9J4	Dystonin	2.08	0.0033738
CD9	A0A7I2V3T0	CD9 antigen	2.06	0.00862712
DHX30	H7BXY3	RNA helicase	2.04	0.000151615
CWC15	Q9P013	Spliceosome-associated protein CWC15 homolog	2	0.0207516
ASCC1	Q8N9N2	Activating signal cointegrator 1 complex subunit 1	1.99	0.00645651
RMDN3	Q96TC7	Regulator of microtubule dynamics protein 3	1.91	0.0143766
ASL	P04424	Argininosuccinate lyase	1.89	0.0293217
PLOD3	O60568	Multifunctional procollagen lysine hydroxylase and glycosyltransferase LH3	1.84	0.000223846
AXL	P30530	Tyrosine-protein kinase receptor UFO	1.83	0.0462208
SIRT3	E9PNA0	NAD-dependent protein deacetylase sirtuin-3, mitochondrial (Fragment)	1.83	0.000385514
SRPX2	O60687	Sushi repeat-containing protein SRPX2	1.83	0.00229328
RFC3	P40938	Replication factor C subunit 3	1.79	0.0287966
GCC2	Q8IWJ2	GRIP and coiled-coil domain-containing protein 2	1.75	0.0172005
OS9	Q13438	Protein-9 OS	1.73	0.000780816
F13A1	P00488	Coagulation factor XIII A chain	1.68	0.0128615
NRM	Q8IXM6	Nurim	1.67	0.01729
MAMDC2	Q7Z304	MAM domain-containing protein 2	1.63	0.0387394
FAT1	Q14517	Protocadherin Fat 1	1.62	0.00118015
FBXL20	Q96IG2	F-box/LRR-repeat protein 20	1.58	0.00268195
MAN1A1	P33908	Mannosyl-oligosaccharide 1,2-alpha-mannosidase IA	1.57	0.00599235
ACOT2	P49753	Acyl-coenzyme A thioesterase 2, mitochondrial	1.5	0.0111045
TPP1	O14773	Tripeptidyl-peptidase 1	1.5	0.0417163
