# Supplementary material for: Human dental pulp stem cell-derived exosomes inhibit adipogenesis and obesity by activating Wnt/β-catenin signaling
Source: Research Square preprint supplement (doi:10.21203/rs.3.rs-8023093/v1), 2025-12-14
Supplement: Supplementary file 3 [file d37b7c007f45c8957d8ce22a.xlsx]

## Sheet: Diff_UP_BP
List of GO term and KEGG pathway with upregulated mRNA in Diff
Category	Term	Count	PValue	Genes	Fold Enrichment	Bonferroni	Benjamini	FDR
GOTERM_BP_DIRECT	GO:0006629~lipid metabolic process	22	1.20237e-07	ACSS3, RETSAT, MOGAT1, EPHX2, ELOVL3, ACSM5, ACAA1B, TLCD3B, AGPAT2, SULT2B1, LIPE, ACOX2, CES1D, GSTA3, CYP11A1, ANGPTL8, SCD3, ADTRP, CYP2E1, SCD1, PPARA, BCAT2	4.01096	0.000134416	0.000134425	0.000134184
GOTERM_BP_DIRECT	GO:0050873~brown fat cell differentiation	7	6.79079e-07	ALDH6A1, FABP4, ADRB3, ADIPOQ, SLC2A4, SCD1, ADIG	22.0603	0.000758923	0.000379605	0.000378926
GOTERM_BP_DIRECT	GO:0006631~fatty acid metabolic process	11	3.05655e-06	FABP4, ACOX2, UCP3, ELOVL3, SCD3, ACSM5, ACAA1B, CYP2E1, SCD1, CD36, PPARA	7.20782	0.00341139	0.00113907	0.00113704
GOTERM_BP_DIRECT	GO:0009617~response to bacterium	10	0.000407901	CFD, CAR3, FABP4, SERPINB9F, ADIPOQ, CYP2E1, SERPINB9C, SCD1, CD36, PRLR	4.47168	0.366266	0.114008	0.113804
GOTERM_BP_DIRECT	GO:0055088~lipid homeostasis	5	0.00100714	ACOX2, SCD1, TLCD3B, GCK, ASGR2	11.2171	0.675851	0.225197	0.224794
GOTERM_BP_DIRECT	GO:0006531~aspartate metabolic process	3	0.00194607	ADSSL1, ASPA, DDO	44.1206	0.886712	0.306565	0.306017
GOTERM_BP_DIRECT	GO:0045471~response to ethanol	6	0.00236736	CAR3, ADCYAP1R1, ADIPOQ, SLC2A4, CYP2E1, PPARA	6.45668	0.929338	0.306565	0.306017
GOTERM_BP_DIRECT	GO:1900121~negative regulation of receptor binding	3	0.00242062	CRTAC1, ADIPOQ, ATP2A3	39.7086	0.933432	0.306565	0.306017
GOTERM_BP_DIRECT	GO:0006730~one-carbon metabolic process	4	0.00246788	CAR3, CAR2, ALDH1L1, AHCYL2	14.7069	0.936866	0.306565	0.306017
GOTERM_BP_DIRECT	GO:0006641~triglyceride metabolic process	4	0.00310741	SLC22A4, CYP2E1, SCD1, CD36	13.5756	0.969177	0.347408	0.346787
GOTERM_BP_DIRECT	GO:0015909~long-chain fatty acid transport	3	0.00479959	FABP4, PLIN2, CD36	28.3633	0.995387	0.467118	0.466283
GOTERM_BP_DIRECT	GO:0071356~cellular response to tumor necrosis factor	6	0.00507234	CCL9, FABP4, CCL6, SLC2A4, NPNT, CAMP	5.40252	0.996605	0.467118	0.466283
GOTERM_BP_DIRECT	GO:0007160~cell-matrix adhesion	5	0.00593787	ITGA7, ITGAE, ITGAL, NPNT, AGT	6.89385	0.998717	0.467118	0.466283
GOTERM_BP_DIRECT	GO:0010887~negative regulation of cholesterol storage	3	0.00626724	CES1D, CES1F, PPARA	24.8178	0.999114	0.467118	0.466283
GOTERM_BP_DIRECT	GO:0006636~unsaturated fatty acid biosynthetic process	3	0.00626724	ELOVL3, SCD3, SCD1	24.8178	0.999114	0.467118	0.466283
GOTERM_BP_DIRECT	GO:0042632~cholesterol homeostasis	5	0.00733875	FABP4, CES1D, CES1F, EPHX2, SCD1	6.48833	0.999735	0.512795	0.511878
GOTERM_BP_DIRECT	GO:0008203~cholesterol metabolic process	5	0.0120922	SULT2B1, LIPE, CES1D, CYP11A1, CES1F	5.60855	0.999999	0.728766	0.727463
GOTERM_BP_DIRECT	GO:0071404~cellular response to low-density lipoprotein particle stimulus	3	0.0127679	CES1D, CES1F, CD36	17.2646	0.999999	0.728766	0.727463
GOTERM_BP_DIRECT	GO:0070542~response to fatty acid	3	0.0138607	SCD3, SCD1, CD36	16.5452	1	0.728766	0.727463
GOTERM_BP_DIRECT	GO:0006573~valine metabolic process	2	0.0149547	ALDH6A1, BCAT2	132.362	1	0.728766	0.727463
GOTERM_BP_DIRECT	GO:0019626~short-chain fatty acid catabolic process	2	0.0149547	CES1D, CES1F	132.362	1	0.728766	0.727463
GOTERM_BP_DIRECT	GO:0035683~memory T cell extravasation	2	0.0149547	ITGAL, F11R	132.362	1	0.728766	0.727463
GOTERM_BP_DIRECT	GO:0050872~white fat cell differentiation	3	0.0149925	FABP4, SCD1, ADIG	15.8834	1	0.728766	0.727463
GOTERM_BP_DIRECT	GO:0006633~fatty acid biosynthetic process	4	0.0188822	ELOVL3, SCD3, ACSM5, SCD1	7.0593	1	0.879597	0.878023
GOTERM_BP_DIRECT	GO:0098609~cell-cell adhesion	6	0.020871	ITGA7, ITGAE, ITGAL, F11R, CSTDC4, LIMS2	3.79986	1	0.933349	0.93168
GOTERM_BP_DIRECT	GO:0070543~response to linoleic acid	2	0.0223486	ADIPOQ, CD36	88.2412	1	0.960988	0.959269
GOTERM_BP_DIRECT	GO:0010875~positive regulation of cholesterol efflux	3	0.0253781	CES1D, CES1F, ADIPOQ	12.0329	1	0.999997	0.998209
GOTERM_BP_DIRECT	GO:0010951~negative regulation of endopeptidase activity	4	0.0253839	SERPINB9F, SERPINB9C, TIMP4, AGT	6.30294	1	0.999997	0.998209
GOTERM_BP_DIRECT	GO:0045777~positive regulation of blood pressure	3	0.0268336	EPHX2, F11R, AGT	11.679	1	0.999997	0.998209
GOTERM_BP_DIRECT	GO:0045672~positive regulation of osteoclast differentiation	3	0.0268336	CAR2, CCL9, PPARGC1B	11.679	1	0.999997	0.998209
GOTERM_BP_DIRECT	GO:1903966~monounsaturated fatty acid biosynthetic process	2	0.0296873	SCD3, SCD1	66.1809	1	1	0.999105
GOTERM_BP_DIRECT	GO:0002548~monocyte chemotaxis	3	0.0313955	CCL9, CCL6, PTPRO	10.732	1	1	0.999105
GOTERM_BP_DIRECT	GO:0042593~glucose homeostasis	5	0.0345445	SUCNR1, ADIPOQ, SLC2A4, CD36, GCK	4.06018	1	1	0.999105
GOTERM_BP_DIRECT	GO:0033627~cell adhesion mediated by integrin	3	0.0345942	ITGA7, ITGAE, ITGAL	10.1817	1	1	0.999105
GOTERM_BP_DIRECT	GO:0005977~glycogen metabolic process	3	0.0362391	GYS2, PPP1R1A, STBD1	9.92714	1	1	0.999105
GOTERM_BP_DIRECT	GO:0045444~fat cell differentiation	4	0.0366332	ANGPTL8, ARXES2, RETN, ADIG	5.45822	1	1	0.999105
GOTERM_BP_DIRECT	GO:0044381~glucose import in response to insulin stimulus	2	0.0369712	TRARG1, SLC2A4	52.9447	1	1	0.999105
GOTERM_BP_DIRECT	GO:0045923~positive regulation of fatty acid metabolic process	2	0.0369712	ADIPOQ, PPARA	52.9447	1	1	0.999105
GOTERM_BP_DIRECT	GO:0042758~long-chain fatty acid catabolic process	2	0.0369712	LIPE, ADTRP	52.9447	1	1	0.999105
GOTERM_BP_DIRECT	GO:0006805~xenobiotic metabolic process	4	0.0405303	GSTA3, RORC, CYP2E1, CYP2F2	5.24205	1	1	0.999105
GOTERM_BP_DIRECT	GO:0009409~response to cold	3	0.0413496	ADRB3, UCP3, AGT	9.23455	1	1	0.999105
GOTERM_BP_DIRECT	GO:0010694~positive regulation of alkaline phosphatase activity	2	0.0442009	NPNT, PPARGC1B	44.1206	1	1	0.999105
GOTERM_BP_DIRECT	GO:1903038~negative regulation of leukocyte cell-cell adhesion	2	0.0442009	ADTRP, PPARA	44.1206	1	1	0.999105
GOTERM_BP_DIRECT	GO:0007229~integrin-mediated signaling pathway	4	0.0467522	ITGA7, ITGAE, ITGAL, LIMS2	4.94811	1	1	0.999105
GOTERM_BP_DIRECT	GO:0030855~epithelial cell differentiation	4	0.0478325	CES1D, CES1F, KRT13, F11R	4.90229	1	1	0.999105
GOTERM_BP_DIRECT	GO:0006094~gluconeogenesis	3	0.0504221	GPD2, PPARA, ATF3	8.27262	1	1	0.999105
GOTERM_BP_DIRECT	GO:0032869~cellular response to insulin stimulus	4	0.0545694	TRARG1, ADIPOQ, SLC2A4, GCK	4.64428	1	1	0.999105
GOTERM_BP_DIRECT	GO:0043547~positive regulation of GTPase activity	5	0.0558943	CCL9, CCL6, RALGAPA2, RASGRP2, F11R	3.46497	1	1	0.999105
GOTERM_BP_DIRECT	GO:0050731~positive regulation of peptidyl-tyrosine phosphorylation	4	0.056911	ADIPOQ, HCLS1, CD36, AGT	4.5642	1	1	0.999105
GOTERM_BP_DIRECT	GO:0033668~negative regulation by symbiont of host apoptotic process	2	0.0584989	SERPINB9F, SERPINB9C	33.0905	1	1	0.999105
GOTERM_BP_DIRECT	GO:0071314~cellular response to cocaine	2	0.065568	PPP1R1B, SLC1A2	29.4137	1	1	0.999105
GOTERM_BP_DIRECT	GO:0006635~fatty acid beta-oxidation	3	0.0725505	ACOX2, ADIPOQ, ACAA1B	6.73026	1	1	0.999105
GOTERM_BP_DIRECT	GO:0010873~positive regulation of cholesterol esterification	2	0.0725843	SCD1, AGT	26.4724	1	1	0.999105
GOTERM_BP_DIRECT	GO:0010745~negative regulation of macrophage derived foam cell differentiation	2	0.0725843	ADIPOQ, PPARA	26.4724	1	1	0.999105
GOTERM_BP_DIRECT	GO:0038166~angiotensin-activated signaling pathway	2	0.0725843	CAR2, AGT	26.4724	1	1	0.999105
GOTERM_BP_DIRECT	GO:0034383~low-density lipoprotein particle clearance	2	0.0795484	ADIPOQ, CD36	24.0658	1	1	0.999105
GOTERM_BP_DIRECT	GO:0070857~regulation of bile acid biosynthetic process	2	0.0795484	CES1D, CES1F	24.0658	1	1	0.999105
GOTERM_BP_DIRECT	GO:0090205~positive regulation of cholesterol metabolic process	2	0.0795484	CES1D, CES1F	24.0658	1	1	0.999105
GOTERM_BP_DIRECT	GO:0007166~cell surface receptor signaling pathway	5	0.0800083	ADCYAP1R1, CD36, ITGAL, AGT, TSHR	3.06393	1	1	0.999105
GOTERM_BP_DIRECT	GO:0010942~positive regulation of cell death	3	0.0812452	ACOX2, CD36, PRODH	6.30294	1	1	0.999105
GOTERM_BP_DIRECT	GO:0008202~steroid metabolic process	4	0.0834403	SULT2B1, LIPE, CYP11A1, CYP2E1	3.893	1	1	0.999105
GOTERM_BP_DIRECT	GO:0042270~protection from natural killer cell mediated cytotoxicity	2	0.0864605	SERPINB9F, SERPINB9C	22.0603	1	1	0.999105
GOTERM_BP_DIRECT	GO:0051791~medium-chain fatty acid metabolic process	2	0.0864605	CES1D, CES1F	22.0603	1	1	0.999105
GOTERM_BP_DIRECT	GO:0009410~response to xenobiotic stimulus	6	0.0872749	ADCYAP1R1, ABCC2, SLC1A2, PLIN2, AGPAT2, KCNK3	2.53729	1	1	0.999105
GOTERM_BP_DIRECT	GO:0051384~response to glucocorticoid	3	0.0879662	UCP3, ADIPOQ, PPARGC1B	6.01645	1	1	0.999105
GOTERM_BP_DIRECT	GO:0007155~cell adhesion	9	0.0898143	TNFRSF12A, CDHR3, ITGA7, LAMC2, ITGAE, CD36, ITGAL, F11R, NPNT	1.94968	1	1	0.999105
GOTERM_BP_DIRECT	GO:0033993~response to lipid	2	0.093321	CD36, PPARA	20.3634	1	1	0.999105
GOTERM_BP_DIRECT	GO:0009083~branched-chain amino acid catabolic process	2	0.093321	BCKDHA, BCAT2	20.3634	1	1	0.999105

## Sheet: Diff_UP_CC
List of GO term and KEGG pathway with upregulated mRNA in Diff
Term	Count	PValue	Genes	Fold Enrichment	Bonferroni	Benjamini	FDR
GO:0005811~lipid particle	6	0.00183595	LIPE, CES1D, CES1F, PLIN4, PLIN2, ADIG	6.84903	0.322659	0.195935	0.194087
GO:0016020~membrane	80	0.0026941	GALNT15, CLEC10A, MOGAT1, PTPRO, FAM107A, ATP2A3, LAMC2, HRCT1, KLHDC7A, ITGAE, SLC2A4, TMEM140, ITGAL, F11R, SLC4A5, ASGR2, LIPE, STBD1, SCD3, SCD1, CD36, LZTS1, CAMP, SNTA1, BOK, ADIG, COX8B, MREG, ABCC2, TNFRSF12A, ELOVL3, CACNA2D3, IL17RE, NPNT, SDCBP2, PRLR, TLCD3B, I830077J02RIK, RNF144B, PRKAR1B, ADRB3, GPD2, CDHR3, ADSSL1, PLIN4, ITGA7, PLIN2, CYP2E1, ADTRP, HPD, TRARG1, SLC22A4, RGS17, S…	1.30109	0.435559	0.195935	0.194087
GO:0031090~organelle membrane	4	0.0036911	MREG, GSTA3, ATP2A3, CAMP	12.7848	0.543406	0.195935	0.194087
GO:0009986~cell surface	15	0.00369689	ADCYAP1R1, ABCC2, SUCNR1, TNFRSF12A, ADIPOQ, TRPV2, SLC1A2, SLC2A4, ITGAE, ITGAL, PRLR, ITGA7, ADTRP, CD36, CAMP	2.41527	0.543968	0.195935	0.194087
GO:0005576~extracellular region	25	0.00929507	CFD, ITIH4, RETNLA, GDF15, ADIPOQ, LAMC2, PRG4, IL17RE, RETN, NPNT, SBSN, CNDP1, HPX, CCL9, CRTAC1, CCL6, PRXL2A, SFRP5, ANGPTL8, HHIPL2, SPARCL1, TIMP4, CAMP, ADIG	1.72117	0.861899	0.387837	0.384179
GO:0005737~cytoplasm	74	0.0109765	ALDH1L1, AHCYL2, FAM107A, YBX2, SLC2A4, GYS2, LIPE, FRAT1, CD36, LZTS1, CAMP, SNTA1, BOK, ADIG, TRIM67, DENND2D, ABCC2, RALGAPA2, IL17RE, SDCBP2, SULT2B1, RNF144B, PRKAR1B, KATNAL2, PPA1, ADSSL1, PLIN4, ITGA7, HCLS1, PLIN2, CYP2E1, CSTDC4, HPD, ASPA, CARD14, BCAT2, TRARG1, ITIH4, RGS17, KANK1, ADCYAP1R1, CABP4, RASGRP2, SBSN, DDO, ABLIM2, MCRIP2, SERPINB9F, SNCG, SMYD1, MYH11, FSD2, CYP2F2, SERPI…	1.26077	0.903662	0.387837	0.384179
GO:0005783~endoplasmic reticulum	22	0.0190414	AHCYL2, RETSAT, MOGAT1, ELOVL3, ADIPOQ, ATP2A3, ARXES2, TLCD3B, AGPAT2, SULT2B1, ERMP1, CES1D, CES1F, STBD1, SCD3, CD36, CYP2E1, CYP2F2, SCD1, UGT1A8, HPD, BOK	1.68828	0.98302	0.538248	0.53317
GO:0008305~integrin complex	3	0.022661	ITGA7, ITGAE, ITGAL	12.7848	0.992245	0.538248	0.53317
GO:0005739~mitochondrion	24	0.0228502	BCKDHA, SLC22A4, ALDH1L1, ACSS3, COX8B, ACSM5, ACAA1B, GCK, RNF144B, LIPE, ALDH6A1, PRXL2A, CYP11A1, GPD2, UCP3, HCLS1, COQ8A, CD36, CYP2E1, SLC25A34, PRODH, PPARGC1B, BCAT2, BOK	1.609	0.992557	0.538248	0.53317
GO:0012505~endomembrane system	5	0.0350567	TRARG1, TRPV2, SLC2A4, ADTRP, SYN2	4.04584	0.999482	0.676203	0.669823
GO:0005901~caveola	4	0.0379887	LIPE, ADCYAP1R1, ADTRP, CD36	5.38309	0.999728	0.676203	0.669823
GO:0030485~smooth muscle contractile fiber	2	0.0382756	MYH11, NPNT	51.1394	0.999745	0.676203	0.669823
GO:0005615~extracellular space	23	0.0595038	CFD, ITIH4, CAR2, RETNLA, GDF15, ADIPOQ, PRG4, LAMC2, RETN, ORM3, AGT, HPX, LIPE, CCL9, PPP1R1A, CCL6, SERPINB9F, SFRP5, SPARCL1, SERPINB9C, CSTDC4, TIMP4, CAMP	1.47394	0.999998	0.97037	0.961215
GO:0030659~cytoplasmic vesicle membrane	4	0.082428	TRARG1, MREG, SLC2A4, CAMP	3.90377	1	1	0.995261
GO:0005789~endoplasmic reticulum membrane	13	0.0858721	RETSAT, MOGAT1, ELOVL3, TLCD3B, AGPAT2, ERMP1, STBD1, SCD3, CYP2E1, CYP2F2, SCD1, HPD, BOK	1.67712	1	1	0.995261
GO:0042383~sarcolemma	4	0.0928613	ITGA7, SLC2A4, CD36, SNTA1	3.70575	1	1	0.995261
GO:0043231~intracellular membrane-bounded organelle	15	0.0969539	AHCYL2, ACSS3, ADCYAP1R1, SLC2A4, SULT2B1, FRAT1, ACOX2, CES1D, CES1F, SCD3, CD36, CYP2E1, CYP2F2, SCD1, PRODH	1.56294	1	1	0.995261
GO:0005777~peroxisome	4	0.0990542	ACOX2, EPHX2, ACAA1B, DDO	3.60137	1	1	0.995261

## Sheet: Diff_UP_MF
List of GO term and KEGG pathway with upregulated mRNA in Diff
Term	Count	PValue	Genes	Fold Enrichment	Bonferroni	Benjamini	FDR
GO:0016491~oxidoreductase activity	15	0.000435922	BCKDHA, ALDH1L1, RETSAT, DDO, ALDH6A1, ACOX2, CYP11A1, GPD2, SCD3, CYP2E1, CYP2F2, SCD1, PRODH, CYB561, HPD	3.02105	0.156007	0.169574	0.169574
GO:0047376~all-trans-retinyl-palmitate hydrolase, all-trans-retinol forming activity	3	0.00168371	LIPE, CES1D, CES1F	47.1284	0.480825	0.327482	0.327482
GO:0050253~retinyl-palmitate esterase activity	3	0.0032562	LIPE, CES1D, CES1F	34.2752	0.718812	0.422221	0.422221
GO:0004771~sterol esterase activity	3	0.00873606	LIPE, CES1D, CES1F	20.9459	0.967066	0.849582	0.849582
GO:0046872~metal ion binding	41	0.0145547	GALNT15, CABP4, ATP2A3, SLC1A2, RORC, ACSM5, ITGAE, RASGRP2, ITGAL, CNDP1, HPX, ERMP1, ABLIM2, CYP11A1, SMYD1, SCD3, SCD1, CYP2F2, TIMP4, TRIM67, BCKDHA, CAR3, CAR2, CENPV, EPHX2, CACNA2D3, PRLR, RNF144B, PHOSPHO1, RUFY4, PPA1, GPD2, ADSSL1, ITGA7, SPARCL1, CYP2E1, PPARA, CYB561, HPD, ASPA, LIMS2	1.41831	0.996665	1	1
GO:0005179~hormone activity	5	0.017381	RETNLA, ANGPTL8, ADIPOQ, RETN, AGT	5.02703	0.998909	1	1
GO:0005506~iron ion binding	6	0.0186719	CYP11A1, SCD3, CYP2E1, CYP2F2, SCD1, HPD	3.90702	0.999346	1	1
GO:0032896~palmitoyl-CoA 9-desaturase activity	2	0.0312426	SCD3, SCD1	62.8378	0.999996	1	1
GO:0042803~protein homodimerization activity	13	0.0326624	GDF15, EPHX2, PTPRO, ADIPOQ, F11R, SDCBP2, ADRB3, ACOX2, HOOK1, UGT1A8, HPD, ATF3, BOK	1.96133	0.999998	1	1
GO:0005178~integrin binding	5	0.034086	ITGA7, ITGAE, ITGAL, F11R, NPNT	4.08038	0.999999	1	1
GO:0016401~palmitoyl-CoA oxidase activity	2	0.0389006	ACOX2, ACAA1B	50.2703	1	1	1
GO:0071949~FAD binding	3	0.0472848	ACOX2, PRODH, DDO	8.5688	1	1	1
GO:0031726~CCR1 chemokine receptor binding	2	0.0540366	CCL9, CCL6	35.9073	1	1	1
GO:0008289~lipid binding	7	0.057693	MREG, FABP4, YBX2, CD36, PPARA, PRLR, SDCBP2	2.53524	1	1	1
GO:0005504~fatty acid binding	3	0.0615104	FABP4, ACOX2, UGT1A8	7.39269	1	1	1
GO:0080030~methyl indole-3-acetate esterase activity	2	0.0615155	CES1D, CES1F	31.4189	1	1	1
GO:0042806~fucose binding	2	0.0615155	CLEC10A, ASGR2	31.4189	1	1	1
GO:0047760~butyrate-CoA ligase activity	2	0.0689358	ACSS3, ACSM5	27.9279	1	1	1
GO:0016717~oxidoreductase activity, acting on paired donors, with oxidation of a pair of donors resulting in the reduction of molecular oxygen to two molecules of water	2	0.0762977	SCD3, SCD1	25.1351	1	1	1
GO:0003824~catalytic activity	7	0.082147	GYS2, ALDH1L1, EPHX2, HHIPL2, ACSM5, GCK, BCAT2	2.309	1	1	1
GO:0016462~pyrophosphatase activity	2	0.0836019	PHOSPHO1, PPA1	22.8501	1	1	1
GO:0003779~actin binding	7	0.0911319	ABLIM2, HOOK1, LRRC27, FAM107A, HCLS1, MYH11, SNTA1	2.24421	1	1	1
GO:0004867~serine-type endopeptidase inhibitor activity	4	0.0932112	ITIH4, SERPINB9F, SERPINB9C, AGT	3.69634	1	1	1
GO:0016791~phosphatase activity	4	0.0979292	CAR3, PHOSPHO1, EPHX2, PTPRO	3.61657	1	1	1

## Sheet: Diff_UP_KEGG
List of GO term and KEGG pathway with upregulated mRNA in Diff
Term	Count	PValue	Genes	Fold Enrichment	Bonferroni	Benjamini	FDR
mmu03320:PPAR signaling pathway	10	4.96534e-07	FABP4, ACOX2, ADIPOQ, PLIN4, SCD3, PLIN2, ACAA1B, SCD1, CD36, PPARA	10.1247	8.98687e-05	8.98727e-05	8.93762e-05
mmu01100:Metabolic pathways	34	0.000166143	ALDH1L1, AHCYL2, ACSS3, GALNT15, MOGAT1, ACAA1B, ACSM5, AGPAT2, DDO, CNDP1, GYS2, CYP11A1, SMYD1, SCD3, SCD1, PRODH, UGT1A8, BCKDHA, CAR3, CAR2, COX8B, EPHX2, ELOVL3, GCK, SULT2B1, ALDH6A1, PHOSPHO1, ACOX2, GSTA3, ADSSL1, CYP2E1, HPD, ASPA, BCAT2	1.89003	0.0296266	0.0150359	0.0149528
mmu04152:AMPK signaling pathway	7	0.00267912	GYS2, LIPE, ADIPOQ, SCD3, SLC2A4, SCD1, CD36	4.96669	0.384654	0.16164	0.160747
mmu01040:Biosynthesis of unsaturated fatty acids	4	0.00601391	ELOVL3, SCD3, ACAA1B, SCD1	10.6012	0.66439	0.258218	0.256791
mmu04931:Insulin resistance	6	0.00713309	GYS2, SLC2A4, CD36, PPARA, AGT, PPARGC1B	4.91509	0.726298	0.258218	0.256791
mmu00983:Drug metabolism - other enzymes	5	0.0183463	CES1D, GSTA3, CES1F, CYP2E1, UGT1A8	4.89728	0.964969	0.552143	0.549093
mmu04923:Regulation of lipolysis in adipocytes	4	0.0245403	LIPE, FABP4, ADRB3, TSHR	6.32351	0.98886	0.552143	0.549093
mmu00280:Valine, leucine and isoleucine degradation	4	0.0245403	BCKDHA, ALDH6A1, ACAA1B, BCAT2	6.32351	0.98886	0.552143	0.549093
mmu05415:Diabetic cardiomyopathy	7	0.0284448	GYS2, COX8B, ATP2A3, SLC2A4, CD36, PPARA, AGT	2.98943	0.99461	0.552143	0.549093
mmu01212:Fatty acid metabolism	4	0.0305052	ELOVL3, SCD3, ACAA1B, SCD1	5.81355	0.996329	0.552143	0.549093
mmu04024:cAMP signaling pathway	7	0.0339126	LIPE, ADCYAP1R1, SUCNR1, PPP1R1B, ATP2A3, PPARA, TSHR	2.86714	0.998059	0.558017	0.554934
mmu04920:Adipocytokine signaling pathway	4	0.0429836	ADIPOQ, SLC2A4, CD36, PPARA	5.07662	0.999648	0.595423	0.592133
mmu00640:Propanoate metabolism	3	0.0452014	BCKDHA, ACSS3, ALDH6A1	8.72032	0.999769	0.595423	0.592133
mmu00980:Metabolism of xenobiotics by cytochrome P450	4	0.0460548	GSTA3, CYP2E1, CYP2F2, UGT1A8	4.93753	0.999803	0.595423	0.592133
mmu04910:Insulin signaling pathway	5	0.0665639	GYS2, LIPE, PRKAR1B, SLC2A4, GCK	3.24137	0.999996	0.689454	0.685645
mmu00250:Alanine, aspartate and glutamate metabolism	3	0.068105	ADSSL1, ASPA, DDO	6.93154	0.999997	0.689454	0.685645
mmu04146:Peroxisome	4	0.0685419	ACOX2, EPHX2, ACAA1B, DDO	4.19116	0.999997	0.689454	0.685645
mmu04936:Alcoholic liver disease	5	0.0693883	ADIPOQ, SCD3, CYP2E1, SCD1, PPARA	3.19539	0.999998	0.689454	0.685645
mmu04512:ECM-receptor interaction	4	0.0723736	ITGA7, LAMC2, CD36, NPNT	4.09591	0.999999	0.689454	0.685645
mmu05410:Hypertrophic cardiomyopathy	4	0.0782977	ATP2A3, CACNA2D3, ITGA7, AGT	3.96088	1	0.694612	0.690775
mmu00140:Steroid hormone biosynthesis	4	0.0823621	SULT2B1, CYP11A1, CYP2E1, UGT1A8	3.8757	1	0.694612	0.690775
mmu05414:Dilated cardiomyopathy	4	0.084428	ATP2A3, CACNA2D3, ITGA7, AGT	3.83447	1	0.694612	0.690775
mmu04976:Bile secretion	4	0.0972808	CAR2, ABCC2, UGT1A8, SLC4A5	3.6044	1	0.734459	0.730401
mmu04930:Type II diabetes mellitus	3	0.0973868	ADIPOQ, SLC2A4, GCK	5.63187	1	0.734459	0.730401

## Sheet: hDPSC-Exo_UP_BP
List of GO term and KEGG pathway with upregulated mRNA in hDPSC-Exo
Term	Count	PValue	Genes	Fold Enrichment	Bonferroni	Benjamini	FDR
GO:0030198~extracellular matrix organization	23	1.87223e-12	COL17A1, POSTN, COL16A1, COL11A1, MMP2, MMP3, FN1, FBLN1, FBLN2, MMP9, FBLN5, ADAMTS10, COL1A1, ADAMTS4, SMOC2, COL3A1, MMP13, COL1A2, COL8A2, COL8A1, TGFBI, ADAMTS6, ADAMTS7	7.02607	3.85502e-09	3.85491e-09	3.80623e-09
GO:0009615~response to virus	15	2.15468e-09	IFITM3, TGTP1, ISG15, DDX60, IFIT1, IFIT3, DCLK1, IFIT2, BST2, ACTA2, OAS2, DHX58, STMN1, IFIT3B, OASL2	8.56273	4.43648e-06	2.21825e-06	2.19024e-06
GO:0007155~cell adhesion	35	3.79166e-09	COL16A1, ITGB4, FBLIM1, COL12A1, SDC3, TNC, STAB2, THBS2, PCDH19, PCDH18, FBLN5, THBS3, EFNB2, FLRT2, PDPN, CCN5, CCN4, PGM5, CTNNA2, EDIL3, CD33, POSTN, PCDH7, OMD, FN1, ATP1B1, MFAP4, ITGA11, COL8A2, CDHR4, COL8A1, PCDHB5, TGFBI, PCDHB9, ADA	3.2373	7.807e-06	2.60234e-06	2.56948e-06
GO:0030199~collagen fibril organization	9	6.75387e-06	GREM1, COL1A1, ZFP469, COL3A1, COL1A2, LOX, COL11A1, FMOD, ADAMTS7	8.92327	0.01381	0.00347656	0.00343265
GO:0007275~multicellular organism development	41	1.18626e-05	SEMA5A, SEMA3D, SEMA3A, RORB, GLI1, FSTL1, IGSF9, GLI2, EFNB2, ZFP57, FLRT2, CREB3L1, PDPN, STMN1, RSPO2, CTNNA2, EDIL3, DACT1, FARP1, CCBE1, SEMA6A, FOXD1, TNFSF12, EYA4, ISLR2, WNT9A, HIC1, BICC1, DCLK1, DKK3, MN1, BMP1, KIF26B, GPR161, MGP, LHX6, ROR1, ANG, DBN1, MDFI, CDH18	2.10835	0.0241294	0.00488503	0.00482335
GO:0035987~endodermal cell differentiation	7	1.46725e-05	COL11A1, MMP2, COL12A1, FN1, COL8A1, INHBA, MMP9	12.7612	0.0297592	0.00503513	0.00497155
GO:0042060~wound healing	11	2.15651e-05	COL1A1, CNN2, IL33, FGF7, COL3A1, PAK1, LOX, PLAU, FN1, PLAT, ELK3	5.75606	0.0434315	0.00634321	0.00626311
GO:0001822~kidney development	13	7.14352e-05	FOXD1, CFH, SCHIP1, SERPINF1, GFRA1, BICC1, GLI2, SULF2, MYO1E, CENPF, CYP26B1, ADAMTS6, FBN1	4.17433	0.136784	0.0183856	0.0181535
GO:0030335~positive regulation of cell migration	16	8.99864e-05	SEMA5A, SEMA6A, SEMA3D, MMP2, SEMA3A, MMP3, FN1, PIK3CD, GLI1, MMP9, CXCL16, COL1A1, PAK1, PLAU, DAAM2, PDPN	3.37397	0.169137	0.0205869	0.0203269
GO:0051607~defense response to virus	15	0.000134903	IFITM3, IL33, SLFN8, ISG15, DDX60, IFIT1, SLFN9, IFIT3, IFIT2, BST2, OAS2, DHX58, IFIT3B, TRIM34A, OASL2	3.43203	0.242539	0.0277765	0.0274257
GO:0007018~microtubule-based movement	9	0.000191318	DNAH2, KIF18B, KIFC1, DNAH8, KIF26B, KIF23, KIF2C, KIF11, KIF6	5.6514	0.32562	0.0358113	0.0353591
GO:0051216~cartilage development	9	0.000258502	COL3A1, BMP1, MMP13, CFH, COL11A1, MGP, TIMP1, WNT9A, SULF2	5.41092	0.412761	0.0443546	0.0437945
GO:0007015~actin filament organization	11	0.00035793	MYO1E, MARCKSL1, TPM2, TMOD2, ELMO1, SORBS2, MYO7A, CTNNA2, RND3, TMSB10, DBN1	4.11692	0.521505	0.0566906	0.0559748
GO:0007399~nervous system development	20	0.000414315	SEMA5A, BRSK1, SEMA6A, SEMA3D, SEMA3A, FN1, ISLR2, GFRA1, NAV2, PCDH18, IGSF9, DCLK1, EFNB2, NOVA1, DPYSL3, STMN1, LHX6, DBN1, BEND6, DACT1	2.52295	0.573972	0.0609339	0.0601644
GO:0001578~microtubule bundle formation	6	0.000455687	CAPN6, MTCL1, MAP2, PRC1, PLK1, TRIM46	9.16444	0.608776	0.0625507	0.0617608
GO:0016477~cell migration	16	0.000527464	ITGB4, MMP2, SDC3, PIK3CD, GFRA1, RND3, MMP9, PAK1, PALLD, PDPN, ELMO1, ITGBL1, ANG, CTNNA2, IGFBP6, PHLDB2	2.86147	0.662549	0.0678781	0.0670209
GO:0045766~positive regulation of angiogenesis	11	0.000565445	GREM1, SEMA5A, CCBE1, SMOC2, ANXA3, TBXA2R, VASH2, PIK3CD, ADM, GATA2, MMP9	3.88534	0.687947	0.0684802	0.0676155
GO:0030324~lung development	10	0.000598662	CCBE1, FGF7, COL3A1, LOX, MGP, PDPN, GLI1, PHEX, ADA, GLI2	4.24918	0.708587	0.0684802	0.0676155
GO:0001525~angiogenesis	15	0.000661107	CCBE1, CFH, MMP2, TNFSF12, FN1, GATA2, AMOT, ELK3, EFNB2, GREM1, PLAU, COL8A2, COL8A1, ANG, TGFBI	2.93325	0.743767	0.0716431	0.0707384
GO:0009725~response to hormone	7	0.000709544	MMP13, LOX, FHL2, TIMP3, MSI1, ANG, TIMP1	6.48522	0.768105	0.0724463	0.0715315
GO:0032331~negative regulation of chondrocyte differentiation	5	0.000765897	GREM1, CCN4, WNT9A, ADAMTS7, GLI2	11.7738	0.793527	0.0724463	0.0715315
GO:0030282~bone mineralization	7	0.000774075	MMP13, COL1A2, LOX, RSPO2, PTN, PHEX, ASPN	6.38062	0.796977	0.0724463	0.0715315
GO:0001503~ossification	9	0.000943156	COL1A1, IGSF10, BMP1, COL11A1, MGP, STC1, PTN, MMP9, ADAMTS7	4.46164	0.856708	0.0844329	0.0833668
GO:0071492~cellular response to UV-A	4	0.00106467	MMP2, MMP3, TIMP1, MMP9	18.838	0.888455	0.09134	0.0901866
GO:0010811~positive regulation of cell-substrate adhesion	6	0.00125887	SMOC2, COL8A1, PTN, FBLN2, EDIL3, DBN1	7.3714	0.925253	0.103681	0.102371
GO:0048251~elastic fiber assembly	4	0.00136605	MFAP4, COL3A1, LOX, FBLN5	17.3889	0.940072	0.108181	0.106815
GO:0060279~positive regulation of ovulation	3	0.00181961	PLAU, PLAT, INHBA	42.3855	0.976482	0.127925	0.12631
GO:2000345~regulation of hepatocyte proliferation	3	0.00181961	PLAU, GLI1, SULF2	42.3855	0.976482	0.127925	0.12631
GO:0008360~regulation of cell shape	10	0.00184447	FBLIM1, PDPN, GAS2, LPAR1, FN1, PLXNB1, PTN, RND3, YPEL4, WASF3	3.6227	0.977658	0.127925	0.12631
GO:0016525~negative regulation of angiogenesis	8	0.0018639	SEMA6A, TNMD, PLK2, SERPINF1, PTN, THBS2, FBLN5, AMOT	4.56679	0.978535	0.127925	0.12631
GO:0048813~dendrite morphogenesis	6	0.00200797	FARP1, SEMA3A, CACNA1A, CTNNA2, DCLK1, DACT1	6.64871	0.984054	0.133368	0.131684
GO:0001649~osteoblast differentiation	8	0.00246858	COL1A1, LOX, CREB3L1, FHL2, RSPO2, CCN4, GLI1, GLI2	4.34723	0.993836	0.158838	0.156832
GO:0034341~response to interferon-gamma	5	0.00291005	IFITM3, BST2, SP100, TGTP1, CXCL16	8.31089	0.997523	0.18157	0.179277
GO:0090263~positive regulation of canonical Wnt signaling pathway	8	0.00321403	SEMA5A, COL1A1, ASPM, PEG12, DAAM2, RSPO2, SULF2, DACT1	4.14782	0.998678	0.194638	0.19218
GO:0007162~negative regulation of cell adhesion	6	0.00354343	SEMA5A, MMP2, TNC, FBLN1, PLXNB1, JAM2	5.84628	0.99933	0.208455	0.205823
GO:0048812~neuron projection morphogenesis	7	0.00416275	BRSK1, PAK1, NYAP1, PLXNB1, NGF, DBN1, DCLK1	4.59998	0.999814	0.237493	0.234495
GO:0048731~system development	4	0.00427931	COL3A1, SEMA3D, SEMA3A, LHX6	11.8977	0.999854	0.237493	0.234495
GO:0071526~semaphorin-plexin signaling pathway	5	0.00438308	SEMA5A, SEMA6A, SEMA3D, SEMA3A, PLXNB1	7.43606	0.999882	0.237493	0.234495
GO:0048167~regulation of synaptic plasticity	6	0.00472642	GRIA1, BRSK1, PLK2, PLAT, PTN, ERC2	5.4691	0.999942	0.243615	0.240539
GO:0033627~cell adhesion mediated by integrin	5	0.00481716	COL16A1, ITGB4, ITGA11, ITGBL1, FBN1	7.24539	0.999952	0.243615	0.240539
GO:0060348~bone development	7	0.00492458	CFH, OGN, BGN, CCN4, STC1, PHEX, SULF2	4.44492	0.999961	0.243615	0.240539
GO:0099509~regulation of presynaptic cytosolic calcium ion concentration	4	0.00496933	MARCKSL1, NPY1R, CACNA1A, ERC2	11.3028	0.999965	0.243615	0.240539
GO:0051301~cell division	16	0.00509758	GPSM2, PLK1, SPICE1, BUB1B, KIF23, KIF11, KNL1, CCNA2, CCNB2, ASPM, KIF18B, SAPCD2, KIFC1, PRC1, KIF2C, FBXO5	2.26623	0.999973	0.244091	0.241009
GO:0001957~intramembranous ossification	3	0.00614868	COL1A1, MN1, MMP2	24.2203	0.999997	0.286532	0.282914
GO:0001764~neuron migration	9	0.00634864	ASPM, COL3A1, SEMA6A, SEMA3A, TRIM46, LHX6, GATA2, PRKG1, DCLK1	3.28146	0.999998	0.286532	0.282914
GO:0030334~regulation of cell migration	8	0.00649811	FGF7, DPYSL3, MMP3, SDC3, TNC, PLXNB1, TMSB10, AMOT	3.64607	0.999999	0.286532	0.282914
GO:0035457~cellular response to interferon-alpha	4	0.00654056	IFIT3B, IFIT1, IFIT3, IFIT2	10.2753	0.999999	0.286532	0.282914
GO:0007411~axon guidance	10	0.00677004	SEMA5A, EFNB2, ABLIM1, SEMA6A, FOXD1, FLRT2, SEMA3D, TUBB3, SEMA3A, GLI2	2.97442	0.999999	0.28745	0.283821
GO:0030010~establishment of cell polarity	5	0.00684073	BRSK1, PAK1, MAP2, KIF26B, PHLDB2	6.5714	0.999999	0.28745	0.283821
GO:0002062~chondrocyte differentiation	6	0.00699026	OSR2, COL3A1, TGFBI, WNT9A, ADAMTS7, GLI2	4.98653	0.999999	0.287859	0.284224
GO:0045773~positive regulation of axon extension	5	0.00935891	PAK1, FN1, ISLR2, NGF, DBN1	6.01213	1	0.377843	0.373072
GO:0008284~positive regulation of cell proliferation	21	0.00982797	OSR2, CNTFR, MARCKSL1, TNC, FN1, ADM, PTN, NGF, GLI1, GLI2, EFNB2, GREM1, CENPF, FGF7, PAK1, SAPCD2, PLAU, PRC1, TIMP1, FBXO5, AGTR2	1.8631	1	0.38915	0.384236
GO:0048843~negative regulation of axon extension involved in axon guidance	4	0.011643	SEMA5A, SEMA6A, SEMA3D, SEMA3A	8.37245	1	0.437608	0.432082
GO:2001222~regulation of neuron migration	4	0.011643	IGSF10, FLRT2, PHACTR1, CTNNA2	8.37245	1	0.437608	0.432082
GO:0007229~integrin-mediated signaling pathway	7	0.0117875	COL3A1, ITGB4, ITGA11, FN1, ITGBL1, ISG15, PTN	3.69718	1	0.437608	0.432082
GO:0007156~homophilic cell adhesion via plasma membrane adhesion molecules	9	0.0119019	PALLD, PCDH7, PCDHB5, CDHR4, PCDH19, PCDH18, PCDHB9, IGSF9, CDH18	2.94004	1	0.437608	0.432082
GO:1904645~response to beta-amyloid	3	0.0127227	MMP2, CACNA1A, MMP9	16.9542	1	0.449232	0.443559
GO:0060346~bone trabecula formation	3	0.0127227	COL1A1, MMP2, THBS3	16.9542	1	0.449232	0.443559
GO:0009954~proximal/distal pattern formation	4	0.0128726	GREM1, CYP26B1, GLI1, GLI2	8.07343	1	0.449232	0.443559
GO:0034097~response to cytokine	6	0.01429	COL3A1, SP100, CFH, TIMP3, TIMP1, CXCL16	4.18623	1	0.489916	0.483729
GO:0006334~nucleosome assembly	7	0.0145143	H2BC15, H1F1, H2BC22, H1F5, MACROH2A2, H2BC18, TSPYL4	3.53213	1	0.489916	0.483729
GO:0071347~cellular response to interleukin-1	6	0.0150045	CCL8, MMP2, FN1, KLF2, MYLK3, ADAMTS7	4.13517	1	0.498293	0.492001
GO:0048048~embryonic eye morphogenesis	3	0.0153701	MFAP5, MFAP2, FBN1	15.4129	1	0.502335	0.495992
GO:0030178~negative regulation of Wnt signaling pathway	5	0.017042	CXXC4, HIC1, MDFI, DACT1, DKK3	5.0459	1	0.548273	0.54135
GO:0007507~heart development	12	0.0180801	CENPF, COL3A1, MMP13, LOX, MMP2, FN1, ADM, MMP9, BICC1, ADAMTS6, FBN1, GLI2	2.26056	1	0.56027	0.553195
GO:0097435~supramolecular fiber organization	3	0.0182312	MFAP5, MFAP4, COL3A1	14.1285	1	0.56027	0.553195
GO:0098885~modification of postsynaptic actin cytoskeleton	3	0.0182312	CTNNA2, CABP1, WASF3	14.1285	1	0.56027	0.553195
GO:0001541~ovarian follicle development	5	0.0191571	PCYT1B, FGF7, MMP2, CTNNA2, INHBA	4.8719	1	0.569504	0.562313
GO:0002376~immune system process	18	0.0192647	GSDMD, IFITM3, TRIM62, SLFN8, CFH, MMP3, PIK3CD, IFIT1, PARP14, INAVA, IFIT3, IFIT2, BST2, OAS2, DHX58, SERPING1, IRF9, OASL2	1.84285	1	0.569504	0.562313
GO:0006508~proteolysis	19	0.0194139	CFH, MMP2, MMP3, ADAM11, VASH2, PLAT, PCOLCE, AEBP1, PRSS23, MMP9, PHEX, ADAMTS10, ADAMTS4, MMP13, BMP1, ESPL1, PLAU, DPEP2, ADAMTS7	1.80162	1	0.569504	0.562313
GO:0045071~negative regulation of viral genome replication	5	0.0202728	IFITM3, BST2, OAS2, ISG15, OASL2	4.78933	1	0.569504	0.562313
GO:0009612~response to mechanical stimulus	5	0.0202728	COL1A1, COL3A1, MMP2, PIEZO2, KCNK2	4.78933	1	0.569504	0.562313
GO:0035455~response to interferon-alpha	3	0.0212976	IFITM3, BST2, TGTP1	13.0417	1	0.569504	0.562313
GO:0043931~ossification involved in bone maturation	3	0.0212976	PLXNB1, THBS3, ADAMTS7	13.0417	1	0.569504	0.562313
GO:0033689~negative regulation of osteoblast proliferation	3	0.0212976	GREM1, MN1, PLXNB1	13.0417	1	0.569504	0.562313
GO:0060394~negative regulation of pathway-restricted SMAD protein phosphorylation	3	0.0212976	GREM1, PMEPA1, SMAD7	13.0417	1	0.569504	0.562313
GO:0043589~skin morphogenesis	3	0.0212976	COL1A1, COL1A2, ITGB4	13.0417	1	0.569504	0.562313
GO:0007049~cell cycle	20	0.0231773	GPSM2, BRSK1, UHRF1, PLK1, SPICE1, BUB1B, KIF23, KIF11, KNL1, MKI67, CCNA2, CCNB2, ASPM, KIF18B, SAPCD2, PRC1, GAS2, KIF2C, FBXO5, CLSPN	1.7309	1	0.609296	0.601602
GO:0048754~branching morphogenesis of an epithelial tube	4	0.0235002	SEMA5A, PAK1, MGP, GLI2	6.45875	1	0.609296	0.601602
GO:0035456~response to interferon-beta	3	0.0245612	IFITM3, BST2, XAF1	12.1102	1	0.609296	0.601602
GO:0051310~metaphase plate congression	3	0.0245612	CENPF, SPICE1, KIF2C	12.1102	1	0.609296	0.601602
GO:0051444~negative regulation of ubiquitin-protein transferase activity	3	0.0245612	BUB1B, FBXO5, SMAD7	12.1102	1	0.609296	0.601602
GO:1903671~negative regulation of sprouting angiogenesis	3	0.0245612	SEMA6A, CREB3L1, KLF2	12.1102	1	0.609296	0.601602
GO:0016055~Wnt signaling pathway	10	0.0259344	DAAM2, TGFB1I1, RSPO2, CCN4, ROR1, WNT9A, CXXC4, HIC1, DACT1, DKK3	2.37454	1	0.635701	0.627673
GO:0000070~mitotic sister chromatid segregation	4	0.0271921	KIF18B, ESPL1, PLK1, KIF11	6.10963	1	0.648316	0.640129
GO:0007160~cell-matrix adhesion	6	0.0276027	ZFP469, COL3A1, ITGB4, ITGA11, FN1, ITGBL1	3.53213	1	0.648316	0.640129
GO:0010717~regulation of epithelial to mesenchymal transition	3	0.0280142	GREM1, PHLDB2, SMAD7	11.3028	1	0.648316	0.640129
GO:0030239~myofibril assembly	3	0.0280142	TMOD2, PGM5, MYL9	11.3028	1	0.648316	0.640129
GO:0030036~actin cytoskeleton organization	9	0.0280234	ACTN3, DAAM2, PALLD, ELMO1, SPIRE2, PHACTR1, TMSB10, WASF3, AMOT	2.50555	1	0.648316	0.640129
GO:0007568~aging	8	0.0298348	SERPINF1, MMP2, SERPING1, GFRA1, ADM, TIMP1, CTNNA2, MMP9	2.69114	1	0.682554	0.673935
GO:0060349~bone morphogenesis	4	0.0332743	OSR2, CYP26B1, MMP13, ACTN3	5.6514	1	0.752876	0.743369
GO:0010755~regulation of plasminogen activation	2	0.0349795	PLAU, PLAUR	56.514	1	0.766201	0.756526
GO:0060032~notochord regression	2	0.0349795	GLI1, GLI2	56.514	1	0.766201	0.756526
GO:0007418~ventral midline development	2	0.0349795	GLI1, GLI2	56.514	1	0.766201	0.756526
GO:0030154~cell differentiation	29	0.0368972	SEMA5A, SEMA3D, TGFB1I1, SEMA3A, PIK3CD, GLI1, GATA2, FSTL1, IGSF9, ELK3, GLI2, EFNB2, FGF7, STMN1, CTNNA2, OSR2, SEMA6A, FOXD1, TNFSF12, EYA4, DCLK1, SMAD7, BMP1, MGP, CCDC63, LHX6, ANG, DBN1, MDFI	1.47649	1	0.799698	0.789599
GO:0030177~positive regulation of Wnt signaling pathway	4	0.0376884	RSPO2, CCN4, SULF2, DACT1	5.38229	1	0.807671	0.797472
GO:0000278~mitotic cell cycle	7	0.0380496	CENPF, KIF18B, ESPL1, CENPH, TUBB3, PLK2, PLK1	2.8257	1	0.807671	0.797472
GO:0048675~axon extension	4	0.0423859	SEMA5A, SEMA3A, NGF, DCLK1	5.13764	1	0.88821	0.876994
GO:0071711~basement membrane organization	3	0.0435693	COL3A1, FLRT2, GAS2	8.92327	1	0.88821	0.876994
GO:0007019~microtubule depolymerization	3	0.0435693	KIF18B, STMN1, KIF2C	8.92327	1	0.88821	0.876994
GO:0055093~response to hyperoxia	3	0.0435693	COL1A1, MMP2, PDPN	8.92327	1	0.88821	0.876994
GO:0008285~negative regulation of cell proliferation	14	0.0445378	IFITM3, TES, TPBG, 4930503L19RIK, ADM, INHBA, WNT9A, IFIT3, H2AC22, IL1RL1, H2AC10, PDPN, CCN5, IFIT3B	1.83147	1	0.899053	0.8877
GO:0071560~cellular response to transforming growth factor beta stimulus	5	0.0454178	COL1A1, CILP, DBN1, FBN1, SMAD7	3.71803	1	0.907915	0.89645
GO:0009653~anatomical structure morphogenesis	5	0.0472675	FOXD1, SEMA3A, GFRA1, FBN1, SMAD7	3.66974	1	0.935805	0.923988
GO:0032436~positive regulation of proteasomal ubiquitin-dependent protein catabolic process	5	0.0491585	SH3RF3, IL33, PLK2, PLK1, SMAD7	3.6227	1	0.947669	0.935702
GO:0030501~positive regulation of bone mineralization	4	0.0499533	OSR2, ISG15, PTN, CD276	4.80971	1	0.947669	0.935702
GO:0030574~collagen catabolic process	4	0.0499533	MMP13, MMP2, MMP3, MMP9	4.80971	1	0.947669	0.935702
GO:0038195~urokinase plasminogen activator signaling pathway	2	0.052009	PLAU, PLAUR	37.676	1	0.947669	0.935702
GO:1904237~positive regulation of substrate-dependent cell migration, cell attachment to substrate	2	0.052009	FN1, FBLN1	37.676	1	0.947669	0.935702
GO:0016078~tRNA catabolic process	2	0.052009	SLFN8, SLFN9	37.676	1	0.947669	0.935702
GO:0002826~negative regulation of T-helper 1 type immune response	2	0.052009	IL33, IL1RL1	37.676	1	0.947669	0.935702
GO:1901953~positive regulation of anterograde dense core granule transport	2	0.052009	MAP2, TRIM46	37.676	1	0.947669	0.935702
GO:0051917~regulation of fibrinolysis	2	0.052009	PLAU, PLAUR	37.676	1	0.947669	0.935702
GO:0007052~mitotic spindle organization	4	0.0526122	GPSM2, CENPH, PLK2, STMN1	4.7095	1	0.950249	0.93825
GO:0000086~G2/M transition of mitotic cell cycle	4	0.0553379	CCNA2, FBXL21, BRSK1, PLK1	4.61339	1	0.99079	0.978278
GO:0060292~long term synaptic depression	3	0.0568688	GRIA1, PLK2, SORCS2	7.70646	1	1	0.987852
GO:0001938~positive regulation of endothelial cell proliferation	5	0.0571332	SEMA5A, FGF7, VASH2, PIK3CD, ANG	3.44598	1	1	0.987852
GO:0007409~axonogenesis	6	0.05815	BRSK1, MAP2, STMN1, TRIM46, CTNNA2, DCLK1	2.8736	1	1	0.987852
GO:0030336~negative regulation of cell migration	7	0.0586469	IFITM3, CNN2, BST2, DPYSL3, STC1, SRGAP3, PTN	2.53589	1	1	0.987852
GO:0007613~memory	6	0.0598659	PLK2, ITPR3, PTN, NGF, RIN1, KCNK2	2.84945	1	1	0.987852
GO:0046596~regulation of viral entry into host cell	3	0.0615778	TRIM62, TRIM30A, TRIM34A	7.3714	1	1	0.987852
GO:0001755~neural crest cell migration	4	0.0639088	SEMA5A, SEMA6A, SEMA3D, SEMA3A	4.34723	1	1	0.987852
GO:0006939~smooth muscle contraction	3	0.0664143	TBXA2R, FKBP1B, ADA	7.06426	1	1	0.987852
GO:0010596~negative regulation of endothelial cell migration	3	0.0664143	SP100, SERPINF1, STC1	7.06426	1	1	0.987852
GO:0048050~post-embryonic eye morphogenesis	2	0.0687388	MFAP2, FBN1	28.257	1	1	0.987852
GO:1900245~positive regulation of MDA-5 signaling pathway	2	0.0687388	DHX58, DDX60	28.257	1	1	0.987852
GO:0071635~negative regulation of transforming growth factor beta production	2	0.0687388	FN1, FBLN1	28.257	1	1	0.987852
GO:0048705~skeletal system morphogenesis	4	0.069942	COL1A1, SCHIP1, COL11A1, MMP2	4.18623	1	1	0.987852
GO:0032874~positive regulation of stress-activated MAPK cascade	3	0.0713725	IGFBP6, MID1, INAVA	6.78169	1	1	0.987852
GO:0001666~response to hypoxia	8	0.0719502	PAK1, PLAU, MMP2, PLAT, ADM, ANG, ATP1B1, ADA	2.20543	1	1	0.987852
GO:0050673~epithelial cell proliferation	5	0.0726465	FGF7, COL8A2, COL8A1, MKI67, GLI2	3.17495	1	1	0.987852
GO:0035249~synaptic transmission, glutamatergic	4	0.076222	GRIA1, CACNA1A, PLAT, GRIN2D	4.03672	1	1	0.987852
GO:0050770~regulation of axonogenesis	3	0.0764465	BRSK1, PAK1, CACNA1A	6.52085	1	1	0.987852
GO:0007189~adenylate cyclase-activating G-protein coupled receptor signaling pathway	6	0.07659	TBXA2R, GPR161, ADGRG6, LPAR1, ADM, ADCY7	2.6491	1	1	0.987852
GO:0030512~negative regulation of transforming growth factor beta receptor signaling pathway	5	0.0798867	CILP, TGFB1I1, PMEPA1, ASPN, SMAD7	3.07142	1	1	0.987852
GO:0051247~positive regulation of protein metabolic process	3	0.0816308	UHRF1, INHBA, KLF2	6.27934	1	1	0.987852
GO:0060326~cell chemotaxis	5	0.082377	SEMA5A, LOX, TPBG, LPAR1, CXCL16	3.03839	1	1	0.987852
GO:0030155~regulation of cell adhesion	4	0.0827409	PLAU, PDPN, TNC, PLAUR	3.89752	1	1	0.987852
GO:0006936~muscle contraction	4	0.0827409	ACTA2, ACTN3, TPM2, TMOD2	3.89752	1	1	0.987852
GO:0021938~smoothened signaling pathway involved in regulation of cerebellar granule cell precursor cell proliferation	2	0.0851742	GLI1, GLI2	22.6056	1	1	0.987852
GO:0070106~interleukin-27-mediated signaling pathway	2	0.0851742	OAS2, OASL2	22.6056	1	1	0.987852
GO:0090131~mesenchyme migration	2	0.0851742	ACTA2, ACTG2	22.6056	1	1	0.987852
GO:0001547~antral ovarian follicle growth	2	0.0851742	GAS2, GPR149	22.6056	1	1	0.987852
GO:0070278~extracellular matrix constituent secretion	2	0.0851742	ZFP469, CREB3L1	22.6056	1	1	0.987852
GO:0007057~spindle assembly involved in female meiosis I	2	0.0851742	CCNB2, FBXO5	22.6056	1	1	0.987852
GO:0061368~behavioral response to formalin induced pain	2	0.0851742	SCN9A, ADAM11	22.6056	1	1	0.987852
GO:1903444~negative regulation of brown fat cell differentiation	2	0.0851742	GATA2, FBN1	22.6056	1	1	0.987852
GO:0016358~dendrite development	4	0.0860874	PAK1, MAP2, PRKG1, IGSF9	3.83146	1	1	0.987852
GO:0001501~skeletal system development	6	0.0868636	COL1A1, COL3A1, COL1A2, MMP9, FBN1, GLI2	2.54951	1	1	0.987852
GO:0045087~innate immune response	19	0.0892753	GSDMD, IFITM3, TRIM62, TRIM30A, CFH, MMP3, PIK3CD, IFIT1, PARP14, INAVA, IFIT3, IFIT2, BST2, OAS2, DHX58, SERPING1, ANG, TRIM34A, OASL2	1.48927	1	1	0.987852
GO:0048704~embryonic skeletal system morphogenesis	4	0.0894906	OSR2, COL11A1, WNT9A, MDFI	3.7676	1	1	0.987852
GO:0090090~negative regulation of canonical Wnt signaling pathway	6	0.0911653	GREM1, TPBG, GLI1, BICC1, DACT1, DKK3	2.51174	1	1	0.987852
GO:0030517~negative regulation of axon extension	3	0.0923085	MAP2, SEMA3A, TRIM46	5.84628	1	1	0.987852
GO:0045648~positive regulation of erythrocyte differentiation	3	0.0977915	ISG15, INHBA, GATA2	5.6514	1	1	0.987852
GO:0007059~chromosome segregation	5	0.0981025	CENPF, ESPL1, CENPH, KIF2C, KNL1	2.85424	1	1	0.987852

## Sheet: hDPSC-Exo_UP_CC
List of GO term and KEGG pathway with upregulated mRNA in hDPSC-Exo
Term	Count	PValue	Genes	Fold Enrichment	Bonferroni	Benjamini	FDR
GO:0005576~extracellular region	96	5.13197e-22	COL16A1, COL12A1, TNC, ADM, PLAT, PRSS23, ADAMTS4, C1QTNF3, ISLR, FGF7, PODNL1, PLAU, IGLON5, CCN5, RSPO2, CCN4, TIMP3, CPXM1, TIMP1, EDIL3, ADAMTS6, ADAMTS7, CCBE1, POSTN, SERPINF1, MMP2, OMD, MMP3, VASH2, BGN, PLAUR, 4930503L19RIK, RNASE4, PCOLCE, WNT9A, NGF, MMP9, ASPN, PDGFRL, DKK3, GREM1, MMP13, LOX, FIBIN, COL8A2, COL8A1, SERPING1, ANG, FAM20A, COL17A1, MEGF6, CFH, SEMA3D, COL11A1, LYZ2, SE…	2.91586	1.89883e-19	1.89883e-19	1.78592e-19
GO:0031012~extracellular matrix	38	3.73327e-21	COL17A1, COL16A1, COL11A1, TNC, FBLN1, PTN, THBS2, ADAMTS10, ADAMTS4, CCN5, CCN4, TIMP3, TIMP1, ADAMTS6, ADAMTS7, CCBE1, POSTN, MMP2, OMD, MMP3, BGN, FN1, NAV2, MMP9, ASPN, MFAP5, COL1A1, SMOC2, COL3A1, MMP13, COL1A2, LOX, MGP, OGN, COL8A2, COL8A1, TGFBI, FBN1	7.36544	1.38131e-18	6.90655e-19	6.49589e-19
GO:0005615~extracellular space	86	1.07663e-14	APOL9A, COL16A1, MTCL1, COL12A1, TNC, ADM, PLAT, PRSS23, CXCL16, ADAMTS4, C1QTNF3, ISLR, FGF7, PODNL1, PLAU, DPYSL3, CCN5, CCN4, TIMP3, CPXM1, TIMP1, CCBE1, POSTN, SEMA6A, SERPINF1, MMP2, OMD, MMP3, BGN, RNASE4, PCOLCE, GFRA1, WNT9A, NGF, MMP9, ASPN, H2BC18, DKK3, GREM1, PROCR, MMP13, LOX, COL8A2, COL8A1, SERPING1, ANG, FAM20A, NPTXR, COL17A1, CFH, SEMA3D, COL11A1, LYZ2, SEMA3A, STC1, FBLN1, PTN,…	2.43144	3.98459e-12	1.32785e-12	1.2489e-12
GO:0005604~basement membrane	17	3.87288e-10	COL17A1, ITGB4, SERPINF1, TNC, FN1, FBLN1, PTN, THBS2, ACTA2, SMOC2, COL8A2, TIMP3, COL8A1, ANG, TIMP1, TGFBI, FBN1	7.99053	1.43297e-07	3.58242e-08	3.36941e-08
GO:0005856~cytoskeleton	57	8.13146e-09	GPSM2, MTCL1, TGFB1I1, KIF11, RND3, ACTG2, CAPN6, TUBB3, STMN1, PGM5, FBXO5, ERC2, SYNPO, TMSB10, CKAP2L, TPM2, TMOD2, VASH2, SPICE1, KIF23, MYO7A, MID1, ACTA2, ASPM, PALLD, GAS2, KIF2C, TAGLN2, RIN1, MYL9, DBN1, BRSK1, TAGLN, DNAH2, FBLIM1, DNAH8, CABP1, FGD3, CNN2, PAK1, ABLIM1, MAP2, TRIM46, CTNNA2, WASF3, FARP1, MARCKSL1, PLK2, PLK1, LCA5, SORBS2, MYO1E, KIF18B, PRC1, KIF26B, SPIRE2, CCDC65	2.2948	3.00864e-06	6.01728e-07	5.6595e-07
GO:0005581~collagen trimer	12	1.82782e-07	COL17A1, COL1A1, C1QTNF3, CCBE1, COL3A1, COL1A2, COL16A1, LOX, COL11A1, COL12A1, COL8A2, COL8A1	8.35611	6.76271e-05	1.12716e-05	1.06014e-05
GO:0030054~cell junction	25	1.35791e-05	COL17A1, BRSK1, TES, ITGB4, FBLIM1, SCHIP1, TGFB1I1, SLC7A2, AMOT, EFNB2, PAK1, FLRT2, PDPN, PGM5, CTNNA2, SYNPO, JAM2, DTNA, ACTN3, SORBS2, MYO1E, SAPCD2, PALLD, DBN1, ADA	2.78125	0.00501169	0.000717751	0.000675074
GO:0001725~stress fiber	10	2.80676e-05	ACTA2, CNN2, ABLIM1, FBLIM1, PALLD, ROR1, PGM5, SYNPO, MYL9, AMOT	6.3375	0.0103314	0.00129813	0.00122094
GO:0001527~microfibril	5	6.06134e-05	MFAP5, MFAP4, MFAP2, ADAMTS10, FBN1	21.6937	0.022178	0.00236203	0.00222159
GO:0005925~focal adhesion	14	6.38387e-05	TES, ACTN3, ITGB4, FBLIM1, TGFB1I1, SORBS2, IL1RL1, PAK1, FLRT2, PALLD, ITGA11, ITGBL1, PGM5, PHLDB2	3.92862	0.0233443	0.00236203	0.00222159
GO:0030027~lamellipodium	13	0.000279582	SORBS2, ACTG2, AMOT, ACTA2, ABLIM1, PAK1, TUBB3, PALLD, DPYSL3, PDPN, CTNNA2, DBN1, WASF3	3.61206	0.0982877	0.00940412	0.00884496
GO:0005737~cytoplasm	164	0.000656299	IFITM3, SH3GL3, TES, CCDC89, BUB1B, MSI1, PLAT, IFIT1, MKI67, ENO2, ALDH1L2, CASC1, IFIT3, MYLK3, ACTG2, IFIT2, AMOT, FGF7, PEG12, CAPN6, UBASH3B, TUBB3, CAPNS2, STMN1, DHX58, DPYSL3, CCN5, CCN4, FBXO5, SYNPO, TMSB10, POSTN, TPM2, TMOD2, VASH2, SPICE1, MYO7A, MID1, SELENOM, ELMO1, ACOT1, CMPK2, ROR1, RIN1, PHLDB2, MYL9, TRIM34A, GRIA1, BRSK1, CFH, FBLIM1, LYZ2, GPR88, LPAR1, DAPP1, STC1, CACNA1A,…	1.2327	0.215658	0.0202359	0.0190327
GO:0030424~axon	21	0.000796514	SEMA6A, DTNA, CFH, ANXA3, SEMA3A, SERPINF1, SDC3, NPY1R, GFRA1, CABP1, SYT13, NGF, IGSF9, DCLK1, PAK1, TUBB3, PALLD, MAP2, SCN9A, CTNNA2, KCNK2	2.32707	0.25534	0.02267	0.0213221
GO:0009986~cell surface	28	0.000963139	GRIA1, IFITM3, ITGB4, SDC3, LPAR1, PLAT, PTN, ENO2, AMOT, IL1RL1, PLAU, ADGRG6, CCN5, RSPO2, CD33, JAM2, ADAMTS7, BGN, PLAUR, ISLR2, SULF2, GREM1, BST2, H1F1, ITGBL1, ROR1, KCNK2, ADA	1.98905	0.299901	0.0250536	0.0235639
GO:0030175~filopodium	8	0.00101568	ARL4C, ACTA2, FARP1, TUBB3, PALLD, PDPN, DBN1, ACTG2	5.07	0.313394	0.0250536	0.0235639
GO:0005871~kinesin complex	6	0.00202812	KIF18B, KIFC1, KIF26B, KIF23, KIF2C, KIF6	6.63573	0.528183	0.0459862	0.0432519
GO:0005930~axoneme	9	0.00211288	CENPF, DNAH2, DNAH8, LCA5, CCDC63, CCDC65, GLI1, CASC1, GLI2	3.93514	0.542781	0.0459862	0.0432519
GO:0005874~microtubule	16	0.00240512	DNAH2, DNAH8, KIF23, KIF11, MID1, KIF6, ASPM, KIF18B, CAPN6, TUBB3, KIFC1, MAP2, PRC1, KIF26B, STMN1, KIF2C	2.45902	0.589741	0.0494386	0.046499
GO:0071953~elastic fiber	3	0.00301001	MFAP4, FBLN1, FBLN5	33.8422	0.67221	0.058616	0.0551307
GO:0042995~cell projection	36	0.00361319	GRIA1, BRSK1, DNAH2, DNAH8, CACNA1A, CASC1, RND3, GLI2, PAK1, TUBB3, MAP2, PDPN, DPYSL3, SCN9A, TRIM46, CTNNA2, ERC2, SYNPO, SLC38A4, FARP1, DTNA, KCND1, ACTN3, PLK2, LCA5, ADAM11, SORBS2, SORCS2, ASPN, DCLK1, ARL4C, PALLD, GPR161, ROR1, CCDC65, DBN1	1.65758	0.737971	0.0661621	0.0622282
GO:0030425~dendrite	22	0.00375515	GRIA1, FARP1, KCND1, ANXA3, PLK2, SEMA3A, TPBG, MMP3, CACNA1A, SORBS2, ITPR3, CABP1, NGF, IGSF9, EFNB2, PAK1, TUBB3, MAP2, TRPM5, RIN1, SYNPO, DBN1	1.99499	0.751427	0.0661621	0.0622282
GO:0005819~spindle	9	0.0039853	CENPF, PRC1, PLK1, SPICE1, BUB1B, KIF23, KIF2C, FBXO5, KIF11	3.54989	0.771794	0.0670254	0.0630401
GO:0000786~nucleosome	9	0.0043333	H2AC22, H2BC15, H1F1, H2AC4, H2BC22, H2AC10, H1F5, MACROH2A2, H2BC18	3.50092	0.799473	0.0697096	0.0655647
GO:0030018~Z disc	9	0.00470423	PAK1, ACTN3, PALLD, FKBP1B, FHL2, SORBS2, PGM5, SYNPO, MYL9	3.45329	0.825298	0.0725236	0.0682114
GO:0015629~actin cytoskeleton	12	0.00627409	ACTA2, MYO1E, ABLIM1, MAP2, PALLD, TPM2, ANG, MYO7A, CTNNA2, SYNPO, DBN1, MYLK3	2.63364	0.90258	0.0928566	0.0873354
GO:0043025~neuronal cell body	22	0.00654835	GRIA1, KCND1, CFH, ANXA3, SERPINF1, LPAR1, CACNA1A, SORBS2, ITPR3, GFRA1, CABP1, ENO2, TUBB3, PALLD, MAP2, ANG, TRPM5, RIN1, ERC2, KCNK2, DBN1, ADA	1.89737	0.912039	0.093188	0.0876471
GO:0000922~spindle pole	8	0.00746928	ASPM, CENPF, CKAP2L, MTCL1, PRC1, PLK2, PLK1, KIF11	3.55299	0.937589	0.102357	0.0962707
GO:0030426~growth cone	10	0.00833777	PAK1, TUBB3, PALLD, DPYSL3, TMOD2, ANG, ERC2, ENO2, DBN1, DCLK1	2.87774	0.954856	0.110178	0.103627
GO:0005858~axonemal dynein complex	3	0.0103399	DNAH2, CCDC65, CASC1	18.8012	0.978628	0.131923	0.124078
GO:0015630~microtubule cytoskeleton	10	0.0185966	CCNB2, CKAP2L, TUBB3, MAP2, PRC1, PLK1, TRIM46, KIF2C, CASC1, MID1	2.51802	0.999037	0.229358	0.215721
GO:0000940~condensed chromosome outer kinetochore	3	0.0246593	CENPF, PLK1, BUB1B	12.0865	0.999903	0.293719	0.276255
GO:0098978~glutamatergic synapse	20	0.0254027	GRIA1, FARP1, SH3GL3, ITGB4, SEMA3A, NPY1R, LPAR1, CACNA1A, PLAT, CABP1, GRIN2D, EFNB2, PAK1, MAP2, ERC2, SYNPO, NPTXR, DBN1, WASF3, DACT1	1.71963	0.999927	0.293719	0.276255
GO:0044297~cell body	7	0.0300613	ACTA2, GRIA1, MAP2, DPYSL3, MMP3, GNB4, ACTG2	2.99111	0.999988	0.337051	0.317011
GO:0005884~actin filament	6	0.031226	PAK1, PALLD, TPM2, GAS2, DBN1, AMOT	3.41841	0.999992	0.339813	0.319608
GO:0005584~collagen type I trimer	2	0.035052	COL1A1, COL1A2	56.4037	0.999998	0.365851	0.344098
GO:0005614~interstitial matrix	3	0.0355964	SMOC2, TNC, NAV2	9.9536	0.999999	0.365851	0.344098
GO:0014069~postsynaptic density	13	0.0380958	GRIA1, KCND1, SORBS2, CABP1, SORCS2, DCLK1, ABLIM1, PAK1, MAP2, CTNNA2, ERC2, SYNPO, DBN1	1.93469	0.999999	0.380958	0.358307
GO:1905370~serine-type endopeptidase complex	3	0.0395867	CFH, PLAU, PLAUR	9.40062	1	0.38545	0.362531
GO:0031225~anchored component of membrane	6	0.0535855	BST2, CNTFR, DPEP2, PLAUR, GFRA1, PRND	2.9428	1	0.508375	0.478148
GO:0000775~chromosome, centromeric region	7	0.0591564	CENPF, CENPH, PLK1, BUB1B, KIF2C, KNL1, MKI67	2.53094	1	0.547197	0.514661
GO:0043005~neuron projection	17	0.0673424	GRIA1, FARP1, SDC3, TMOD2, LCA5, NPY1R, LPAR1, RAB39B, ENO2, SORCS2, FLRT2, MAP2, GPR161, STMN1, GPR149, KCNK2, ADA	1.60077	1	0.592676	0.557436
GO:0099544~perisynaptic space	2	0.0688785	GRIA1, PLAT	28.2019	1	0.592676	0.557436
GO:0044308~axonal spine	2	0.0688785	GRIA1, DBN1	28.2019	1	0.592676	0.557436
GO:1990769~proximal neuron projection	2	0.0853457	MAP2, TRIM46	22.5615	1	0.71768	0.675007
GO:0008305~integrin complex	3	0.0981412	ITGB4, ITGA11, ITGBL1	5.64037	1	0.799219	0.751697

## Sheet: hDPSC-Exo_UP_MF
List of GO term and KEGG pathway with upregulated mRNA in hDPSC-Exo
Term	Count	PValue	Genes	Fold Enrichment	Bonferroni	Benjamini	FDR
GO:0005201~extracellular matrix structural constituent	18	9.75602e-11	COL17A1, POSTN, COL16A1, COL11A1, TNC, FN1, FBLN1, FBLN2, COL1A1, MFAP4, COL3A1, COL1A2, MFAP2, COL8A2, COL8A1, IGFBP6, TGFBI, FBN1	7.98817	4.76094e-08	4.76094e-08	4.62435e-08
GO:0008201~heparin binding	19	3.208e-09	POSTN, CFH, COL11A1, FN1, PCOLCE, PTN, NAV2, THBS2, FSTL1, THBS3, SMOC2, FGF7, CCL8, H1F1, CCN5, RSPO2, CCN4, ANG, FBN1	5.97464	1.5655e-06	7.82752e-07	7.60296e-07
GO:0005178~integrin binding	16	1.38091e-07	COL16A1, ITGB4, FN1, FBLN1, ISG15, GFRA1, PTN, FBLN5, COL3A1, ITGA11, CCN5, CCN4, ITGBL1, TGFBI, JAM2, FBN1	5.71736	6.73864e-05	2.24629e-05	2.18184e-05
GO:0005509~calcium ion binding	34	1.50365e-06	MEGF6, STAB2, FBLN1, ITPR3, CALML4, CABP1, THBS2, PCDH19, PCDH18, FBLN2, FSTL1, FBLN5, THBS3, CAPNS2, EDIL3, CCBE1, ACTN3, ANXA3, PCDH7, SYT13, ASPN, SULF2, SMOC2, MMP13, BMP1, LPCAT2, MGP, CDHR4, PCDHB5, MYL9, PCDHB9, CDH18, CAPS2, FBN1	2.55602	0.000733513	0.000145226	0.00014106
GO:0008017~microtubule binding	19	1.66833e-06	MTCL1, PLK1, VASH2, KIF23, KIF11, GLI1, MID1, CASC1, KIF6, CENPF, KIF18B, CAPN6, KIFC1, MAP2, PRC1, KIF26B, TRIM46, GAS2, KIF2C	3.96046	0.000813814	0.000145226	0.00014106
GO:0005518~collagen binding	11	1.78557e-06	CCBE1, PAK1, MMP13, LOX, ADGRG6, ITGA11, PCOLCE, AEBP1, TGFBI, ASPN, SMAD7	7.56657	0.000870978	0.000145226	0.00014106
GO:0005515~protein binding	134	2.06002e-05	CNTFR, SH3GL3, CCDC89, BUB1B, RORB, IFIT1, IFIT3, AMOT, FGF7, CAPN6, UBASH3B, PLAU, TUBB3, CAPNS2, STMN1, DPYSL3, PIEZO2, FBXO5, PRND, SEMA6A, ACTN3, TPM2, VASH2, ADAM11, ISLR2, PCOLCE, MYO7A, ATP1B1, MID1, HIC1, PROCR, LOX, DAAM2, GPR161, ELMO1, RIN1, PHLDB2, COL17A1, GRIA1, BRSK1, NYAP1, CFH, FBLIM1, SDC3, LPAR1, CACNA1A, FBLN1, ITPR3, CABP1, DDX60, GATA2, FBLN2, PCDH18, FBLN5, EFNB2, CCNB2, ZF…	1.36707	0.0100026	0.00143613	0.00139493
GO:0003777~microtubule motor activity	8	4.53758e-05	KIF18B, KIFC1, DNAH8, KIF26B, KIF23, KIF2C, KIF11, KIF6	8.30635	0.0219005	0.00276792	0.00268852
GO:0030020~extracellular matrix structural constituent conferring tensile strength	7	5.72664e-05	COL1A1, COL3A1, COL1A2, COL16A1, COL11A1, COL12A1, COL8A1	10.137	0.0275599	0.00310511	0.00301603
GO:0004222~metalloendopeptidase activity	11	0.00015707	ADAMTS4, BMP1, MMP13, MMP2, MMP3, ADAM11, MMP9, PHEX, ADAMTS10, ADAMTS6, ADAMTS7	4.55132	0.073792	0.00766504	0.00744514
GO:0008237~metallopeptidase activity	12	0.000194408	ADAMTS4, BMP1, MMP13, MMP2, MMP3, ADAM11, DPEP2, CPXM1, MMP9, PHEX, ADAMTS10, ADAMTS7	4.05126	0.0905184	0.00862466	0.00837723
GO:0001968~fibronectin binding	7	0.000218639	MMP13, MMP2, MFAP2, TNC, FBLN1, IGFBP6, MMP9	8.02515	0.101211	0.00889132	0.00863624
GO:0003774~motor activity	7	0.000679494	MYO1E, KIF18B, KIFC1, KIF26B, GPR88, KIF2C, MYO7A	6.52893	0.282301	0.0255071	0.0247754
GO:0003779~actin binding	18	0.000852379	MARCKSL1, ACTN3, TPM2, TMOD2, VASH2, MYO7A, CNN2, MYO1E, ABLIM1, PALLD, DAAM2, MAP2, SPIRE2, ANG, PHACTR1, SYNPO, DBN1, WASF3	2.52687	0.340411	0.0297115	0.0288591
GO:0045499~chemorepellent activity	5	0.00175776	SEMA5A, SEMA6A, FLRT2, SEMA3D, SEMA3A	9.48786	0.57622	0.0531027	0.0515793
GO:0008270~zinc ion binding	27	0.00175829	SLFN8, TRIM30A, TES, UHRF1, RORB, AEBP1, GATA2, CXXC4, SLFN9, GLI2, DHX58, TRIM46, TIMP3, CPXM1, TIMP1, TRIM62, DTNA, ZFR2, MMP2, MMP3, MID1, MMP9, MMP13, BMP1, TCEA3, ADA, TRIM34A	1.93212	0.576331	0.0531027	0.0515793
GO:0008191~metalloendopeptidase inhibitor activity	4	0.00184989	BST2, TIMP3, TIMP1, NGF	15.7227	0.594884	0.0531027	0.0515793
GO:0050840~extracellular matrix binding	5	0.00226339	SMOC2, ADGRG6, BGN, TGFBI, FBLN2	8.87574	0.66905	0.0613631	0.0596027
GO:0030215~semaphorin receptor binding	4	0.00703167	SEMA5A, SEMA6A, SEMA3D, SEMA3A	10.0054	0.96805	0.180603	0.175422
GO:0042802~identical protein binding	52	0.00763286	SH3GL3, GPSM2, TRIM30A, SCHIP1, SLC40A1, FHL2, MSI1, ENO2, IFIT3, C1QTNF3, UBASH3B, DPYSL3, PRKG1, TRIM62, PCYT1B, SEMA6A, ACTN3, TPM2, RAB3IL1, MYO7A, MID1, MMP9, BCAT1, MDFI, TRIM34A, CREB5, GRIA1, SP100, CFH, UHRF1, LYZ2, SDC3, STC1, FBLN1, ITPR3, CABP1, PAK1, IGFBP6, CTNNA2, CD276, PLK1, FN1, SORBS2, INHBA, COL1A1, BST2, COL1A2, BMP1, PRC1, IFIT3B, TGFBI, FBN1	1.42791	0.976225	0.186242	0.180899
GO:0008022~protein C-terminus binding	11	0.0105578	GRIA1, PROCR, SH3GL3, GPSM2, CENPF, FN1, FBLN1, MKI67, ATP1B1, FBLN5, VGLL3	2.58686	0.99437	0.229826	0.223232
GO:0010997~anaphase-promoting complex binding	3	0.0108319	PLK1, FBXO5, CLSPN	18.3432	0.995082	0.229826	0.223232
GO:0045545~syndecan binding	3	0.0108319	SEMA5A, TNC, PTN	18.3432	0.995082	0.229826	0.223232
GO:0046872~metal ion binding	84	0.0119026	TRIM30A, TES, TGFB1I1, SLC40A1, FHL2, RORB, GLI1, ENO2, PHEX, GLI2, ADAMTS4, CYP26B1, TUBB3, CAPNS2, DHX58, TIMP3, CPXM1, FBXO5, TIMP1, EDIL3, PRND, ADAMTS6, OASL2, ADAMTS7, OSR2, POSTN, TRIM62, KCND1, ACTN3, MMP2, MMP3, MID1, MMP9, HIC1, MMP13, LOX, OAS2, DPEP2, NPTXR, MYL9, CAPS2, TRIM34A, BRSK1, SP100, SLFN8, FBLIM1, UHRF1, COL11A1, CACNA1A, CABP1, GATA2, SLFN9, CXXC4, ADCY7, ADAMTS10, PHF21B,…	1.27236	0.997101	0.242019	0.235076
GO:0005539~glycosaminoglycan binding	4	0.0124961	SMOC2, BGN, PTN, SULF2	8.15253	0.997838	0.243924	0.236926
GO:0005261~cation channel activity	5	0.0154454	CALHM2, SCN9A, PIEZO2, TRPM5, GRIN2D	5.19147	0.999498	0.289898	0.281581
GO:0048407~platelet-derived growth factor binding	3	0.0191601	COL1A1, COL3A1, COL1A2	13.7574	0.999921	0.333932	0.324352
GO:0030021~extracellular matrix structural constituent conferring compression resistance	3	0.0191601	OGN, BGN, ASPN	13.7574	0.999921	0.333932	0.324352
GO:0008083~growth factor activity	8	0.0202946	FGF7, BMP1, OGN, CCN5, TIMP1, INHBA, PTN, NGF	2.91547	0.999955	0.341509	0.331712
GO:0016504~peptidase activator activity	3	0.0223759	FN1, FBLN1, PCOLCE	12.6991	0.999984	0.36398	0.353538
GO:0030527~structural constituent of chromatin	5	0.0233254	H1F1, H2BC22, H2AC10, H1F5, MACROH2A2	4.5858	0.99999	0.367187	0.356653
GO:0051015~actin filament binding	10	0.0258413	MYO1E, TAGLN, ABLIM1, MARCKSL1, ACTN3, TPM2, GAS2, MYO7A, CTNNA2, DBN1	2.37196	0.999997	0.39408	0.382775
GO:0002020~protease binding	8	0.0318484	ADAMTS4, COL1A1, CCBE1, COL3A1, COL1A2, FN1, TIMP3, TIMP1	2.65203	1	0.47097	0.457459
GO:0008233~peptidase activity	16	0.0501051	MMP2, MMP3, VASH2, PLAT, PRSS23, MMP9, PHEX, ADAMTS10, ADAMTS4, MMP13, BMP1, ESPL1, PLAU, DPEP2, CPXM1, ADAMTS7	1.69976	1	0.699586	0.679516
GO:0008569~ATP-dependent microtubule motor activity, minus-end-directed	3	0.0501752	DNAH2, KIFC1, DNAH8	8.25444	1	0.699586	0.679516
GO:0035373~chondroitin sulfate proteoglycan binding	2	0.0533788	SEMA5A, PTN	36.6864	1	0.722722	0.701988
GO:0005102~receptor binding	14	0.0547965	CNTFR, PLAUR, FN1, PLAT, INHBA, WNT9A, NGF, EFNB2, MFAP4, PDPN, FKBP1B, RSPO2, ANG, CD276	1.76701	1	0.722722	0.701988
GO:0003727~single-stranded RNA binding	4	0.0619197	ZFR2, DHX58, MSI1, DDX60	4.40237	1	0.788628	0.766004
GO:0005520~insulin-like growth factor binding	3	0.0645017	CCN5, CCN4, IGFBP6	7.17777	1	0.788628	0.766004
GO:0005125~cytokine activity	9	0.0649722	GREM1, IL33, CCL8, BMP1, TNFSF12, TIMP1, INHBA, WNT9A, CXCL16	2.10752	1	0.788628	0.766004
GO:0003725~double-stranded RNA binding	5	0.0662577	OAS2, ZFR2, DHX58, DDX60, OASL2	3.27557	1	0.788628	0.766004
GO:0005516~calmodulin binding	8	0.0724078	CNN2, MYO1E, ASPM, MARCKSL1, MAP2, CACNA1A, AEBP1, MYO7A	2.20118	1	0.84131	0.817174
GO:0043395~heparan sulfate proteoglycan binding	3	0.0747176	GREM1, SEMA5A, CFH	6.60355	1	0.847958	0.823632
GO:0051219~phosphoprotein binding	4	0.0776905	UBASH3B, DPYSL3, PLAT, MID1	4.00215	1	0.861658	0.836939
GO:0005216~ion channel activity	7	0.0894026	GRIA1, KCND1, SCN9A, CACNA1A, ITPR3, TRPM5, GRIN2D	2.26592	1	0.964482	0.936812
GO:0004181~metallocarboxypeptidase activity	3	0.0909143	VASH2, CPXM1, AEBP1	5.89603	1	0.964482	0.936812

## Sheet: hDPSC-Exo_UP_KEGG
List of GO term and KEGG pathway with upregulated mRNA in hDPSC-Exo
Term	Count	PValue	Genes	Fold Enrichment	Bonferroni	Benjamini	FDR
mmu04926:Relaxin signaling pathway	13	2.83103e-06	MMP2, PIK3CD, MMP9, ADCY7, COL1A1, ACTA2, COL3A1, MMP13, COL1A2, CREB3L1, GNB4, GNG8, CREB5	5.64028	0.000648096	0.000648305	0.000597347
mmu04974:Protein digestion and absorption	10	0.000122146	COL17A1, COL1A1, COL3A1, COL1A2, COL16A1, COL11A1, COL12A1, COL8A2, COL8A1, ATP1B1	5.18231	0.0275855	0.0139857	0.0128864
mmu05034:Alcoholism	13	0.000280669	H2AC4, CALML4, MACROH2A2, H2BC18, GRIN2D, H2AC22, H2BC15, CREB3L1, H2AC10, H2BC22, GNB4, GNG8, CREB5	3.54925	0.0622597	0.0214244	0.0197404
mmu04510:Focal adhesion	12	0.000884849	COL1A1, PAK1, COL1A2, ITGB4, ITGA11, TNC, FN1, PIK3CD, THBS2, MYL9, MYLK3, THBS3	3.34143	0.183493	0.0365271	0.0336559
mmu04512:ECM-receptor interaction	8	0.000928486	COL1A1, COL1A2, ITGB4, ITGA11, TNC, FN1, THBS2, THBS3	5.08809	0.191619	0.0365271	0.0336559
mmu05205:Proteoglycans in cancer	12	0.00103997	COL1A1, PAK1, COL1A2, PLAU, MMP2, PLAUR, FN1, PIK3CD, TIMP3, ITPR3, WNT9A, MMP9	3.27623	0.212016	0.0365271	0.0336559
mmu04360:Axon guidance	11	0.00140936	SEMA5A, EFNB2, ABLIM1, PAK1, SEMA6A, SEMA3D, SEMA3A, PIK3CD, PLXNB1, SRGAP3, MYL9	3.40143	0.276006	0.0365271	0.0336559
mmu04611:Platelet activation	9	0.00168322	COL1A1, COL3A1, COL1A2, TBXA2R, PIK3CD, ITPR3, ADCY7, PRKG1, MYLK3	4.02976	0.320081	0.0365271	0.0336559
mmu04713:Circadian entrainment	8	0.00174581	GRIA1, GNB4, GNG8, ITPR3, CALML4, ADCY7, PRKG1, GRIN2D	4.56889	0.329774	0.0365271	0.0336559
mmu04151:PI3K-Akt signaling pathway	16	0.00176451	ITGB4, TNC, LPAR1, FN1, PIK3CD, NGF, THBS2, THBS3, COL1A1, FGF7, COL1A2, CREB3L1, ITGA11, GNB4, GNG8, CREB5	2.49444	0.332643	0.0365271	0.0336559
mmu04024:cAMP signaling pathway	12	0.00183537	GRIA1, PAK1, CREB3L1, NPY1R, PIK3CD, CALML4, GLI1, ATP1B1, MYL9, ADCY7, CREB5, GRIN2D	3.05285	0.343404	0.0365271	0.0336559
mmu05165:Human papillomavirus infection	16	0.00191408	ITGB4, TNC, FN1, PIK3CD, ISG15, WNT9A, THBS2, THBS3, COL1A1, CCNA2, COL1A2, CREB3L1, ITGA11, IRF9, CREB5, OASL2	2.47377	0.355155	0.0365271	0.0336559
mmu04371:Apelin signaling pathway	9	0.0029918	ACTA2, GNB4, GNG8, PLAT, ITPR3, CALML4, ADCY7, KLF2, MYLK3	3.67679	0.496488	0.0527017	0.0485592
mmu04725:Cholinergic synapse	8	0.00372058	CREB3L1, GNB4, PIK3CD, GNG8, CACNA1A, ITPR3, ADCY7, CREB5	3.99778	0.574121	0.060858	0.0560744
mmu04270:Vascular smooth muscle contraction	9	0.00405863	ACTA2, ITPR3, ADM, CALML4, MYL9, ADCY7, PRKG1, MYLK3, ACTG2	3.49806	0.605966	0.0619617	0.0570914
mmu05215:Prostate cancer	7	0.00822977	PLAU, CREB3L1, MMP3, PIK3CD, PLAT, MMP9, CREB5	3.9574	0.849293	0.117789	0.10853
mmu04915:Estrogen signaling pathway	8	0.0097654	CREB3L1, MMP2, PIK3CD, ITPR3, CALML4, MMP9, ADCY7, CREB5	3.34143	0.894312	0.127102	0.117112
mmu04728:Dopaminergic synapse	8	0.0101501	GRIA1, CREB3L1, GNB4, GNG8, CACNA1A, ITPR3, CALML4, CREB5	3.31668	0.90331	0.127102	0.117112
mmu04971:Gastric acid secretion	6	0.0105456	ITPR3, CALML4, ATP1B1, ADCY7, KCNK2, MYLK3	4.47752	0.911767	0.127102	0.117112
mmu04022:cGMP-PKG signaling pathway	9	0.011858	CREB3L1, ITPR3, CALML4, ATP1B1, MYL9, ADCY7, PRKG1, MYLK3, CREB5	2.91168	0.934893	0.135775	0.125102
mmu04724:Glutamatergic synapse	7	0.0151745	GRIA1, GNB4, GNG8, CACNA1A, ITPR3, ADCY7, GRIN2D	3.4671	0.969851	0.165474	0.152467
mmu04970:Salivary secretion	6	0.0174169	LYZ2, ITPR3, CALML4, ATP1B1, ADCY7, PRKG1	3.95075	0.982112	0.181294	0.167044
mmu04114:Oocyte meiosis	7	0.0205849	CCNB2, ESPL1, PLK1, ITPR3, CALML4, FBXO5, ADCY7	3.23787	0.991461	0.204954	0.188844
mmu04810:Regulation of actin cytoskeleton	10	0.0218154	FGD3, FGF7, PAK1, ITGB4, ITGA11, LPAR1, FN1, PIK3CD, MYL9, MYLK3	2.4229	0.993597	0.208155	0.191794
mmu04610:Complement and coagulation cascades	6	0.0257007	PROCR, CFH, PLAU, PLAUR, SERPING1, PLAT	3.57249	0.997426	0.235418	0.216914
mmu04613:Neutrophil extracellular trap formation	9	0.0318288	H2AC22, GSDMD, H2BC15, H2AC4, H2BC22, H2AC10, PIK3CD, MACROH2A2, H2BC18	2.42173	0.999393	0.266313	0.24538
mmu04310:Wnt signaling pathway	8	0.0323593	PEG12, DAAM2, SERPINF1, RSPO2, CCN4, ROR1, WNT9A, CXXC4	2.61843	0.999465	0.266313	0.24538
mmu04933:AGE-RAGE signaling pathway in diabetic complications	6	0.0336423	COL1A1, COL3A1, COL1A2, MMP2, FN1, PIK3CD	3.32489	0.999605	0.266313	0.24538
mmu05031:Amphetamine addiction	5	0.0339607	GRIA1, CREB3L1, CALML4, CREB5, GRIN2D	4.05572	0.999634	0.266313	0.24538
mmu04925:Aldosterone synthesis and secretion	6	0.0348882	CREB3L1, ITPR3, CALML4, ATP1B1, ADCY7, CREB5	3.29229	0.999706	0.266313	0.24538
mmu04927:Cortisol synthesis and secretion	5	0.0388184	CREB3L1, ITPR3, ADCY7, KCNK2, CREB5	3.88673	0.999885	0.286755	0.264215
mmu05146:Amoebiasis	6	0.0415444	COL1A1, COL3A1, COL1A2, FN1, PIK3CD, RAB7B	3.13845	0.99994	0.293305	0.27025
mmu04918:Thyroid hormone synthesis	5	0.0422666	CREB3L1, ITPR3, ATP1B1, ADCY7, CREB5	3.78169	0.999949	0.293305	0.27025
mmu04723:Retrograde endocannabinoid signaling	7	0.0480522	GRIA1, NDUFA4L2, GNB4, GNG8, CACNA1A, ITPR3, ADCY7	2.64718	0.999987	0.316915	0.292004
mmu05322:Systemic lupus erythematosus	7	0.0493651	H2AC22, H2BC15, H2AC4, H2BC22, H2AC10, MACROH2A2, H2BC18	2.62941	0.999991	0.316915	0.292004
mmu04668:TNF signaling pathway	6	0.0504828	CREB3L1, MMP3, PIK3CD, IFI47, MMP9, CREB5	2.9718	0.999993	0.316915	0.292004
mmu05203:Viral carcinogenesis	9	0.0512046	CCNA2, SP100, H2BC15, CREB3L1, H2BC22, PIK3CD, H2BC18, IRF9, CREB5	2.19965	0.999994	0.316915	0.292004
mmu04261:Adrenergic signaling in cardiomyocytes	7	0.0534332	TPM2, CREB3L1, CALML4, AGTR2, ATP1B1, ADCY7, CREB5	2.57752	0.999997	0.322005	0.296695
mmu04062:Chemokine signaling pathway	8	0.0548508	PAK1, CCL8, ELMO1, GNB4, PIK3CD, GNG8, ADCY7, CXCL16	2.33204	0.999998	0.322073	0.296757
mmu05200:Pathways in cancer	16	0.0584434	MMP2, LPAR1, FN1, PIK3CD, CALML4, WNT9A, GLI1, MMP9, ADCY7, GLI2, CCNA2, FGF7, PEG12, GNB4, GNG8, CTNNA2	1.64918	0.999999	0.328036	0.302252
mmu04670:Leukocyte transendothelial migration	6	0.0587314	MMP2, PIK3CD, CTNNA2, MMP9, MYL9, JAM2	2.84588	0.999999	0.328036	0.302252
mmu04020:Calcium signaling pathway	9	0.0638766	FGF7, TBXA2R, CACNA1A, ITPR3, CALML4, NGF, ADCY7, MYLK3, GRIN2D	2.09884	1	0.345906	0.318717
mmu04540:Gap junction	5	0.0664622	TUBB3, LPAR1, ITPR3, ADCY7, PRKG1	3.25401	1	0.345906	0.318717
mmu04911:Insulin secretion	5	0.0664622	CREB3L1, ITPR3, ATP1B1, ADCY7, CREB5	3.25401	1	0.345906	0.318717
mmu04923:Regulation of lipolysis in adipocytes	4	0.0802897	NPY1R, PIK3CD, ADCY7, PRKG1	3.92765	1	0.402052	0.37045
mmu04914:Progesterone-mediated oocyte maturation	5	0.0807616	CCNA2, CCNB2, PLK1, PIK3CD, ADCY7	3.04179	1	0.402052	0.37045
mmu04730:Long-term depression	4	0.0904384	GRIA1, CACNA1A, ITPR3, PRKG1	3.73126	1	0.434498	0.400345
mmu04350:TGF-beta signaling pathway	5	0.0910739	GREM1, INHBA, FMOD, FBN1, SMAD7	2.91505	1	0.434498	0.400345

## Sheet: hDPSC-Exo_UP_GSEA
List of GSEA analysis results with upregulated mRNA in hDPSC-Exo
Description	enrichmentScore	NES	pvalue	p.adjust	qvalue	geneID_symbol
HALLMARK_EPITHELIAL_MESENCHYMAL_TRANSITION	0.449379	2.18969	9.53392e-05	0.000648306	0.000381357	Col8a2/Tagln/Fmod/Htra1/Spp1/Grem1/Acta2/Timp3/Tnc/Myl9/Col11a1/Pmepa1/Mgp/Fbln5/Plaur/Fbln1/Mfap5/Thbs2/Cxcl5/Dpysl3/Col1a1/Fbn1/Fn1/Col12a1/Inhba/Mmp3/Col1a2/Lama2/Bgn/Eno2/Timp1/Postn/Tpm2/Fstl1/Lox/Serpine1/Col3a1/Pcolce/Abi3bp/Col16a1/Edil3/Tgfbi/Vegfc/Cxcl1/Bmp1/Fbln2/Mmp2
HALLMARK_INTERFERON_ALPHA_RESPONSE	0.526062	1.99781	0.00148161	0.00839577	0.00493869	Oas1a/Cxcl10/Ifi44/Cmpk2/Ifit3/Ddx60/Dhx58/Isg15/Gbp3/Ifit2/Psmb9/Irf9/Rtp4/Procr
HALLMARK_MITOTIC_SPINDLE	0.453118	1.87408	0.00648316	0.0210855	0.0124032	Cenpf/Sorbs2/Kif2c/Plk1/Kif23/Ccnb2/Ttk/Kif11/Bub1/Espl1/Fbxo5/Nusap1/Kif4/Ect2/Palld/Synpo/Prc1/Top2a/Farp1/Ndc80/Myo1e/Mid1
HALLMARK_INTERFERON_GAMMA_RESPONSE	0.429576	1.86156	0.00435023	0.0184885	0.0108756	Cxcl10/Ifi44/Ccl5/Oas2/Cmpk2/Ifit3/Gbp9/Ddx60/Dhx58/Isg15/Xaf1/Gbp3/Ifit2/Psmb9/Irf9/Ptgs2/Rtp4
HALLMARK_G2M_CHECKPOINT	0.422056	1.85286	0.00682177	0.0210855	0.0124032	Cenpf/Mki67/Kif2c/Plk1/Kif23/Troap/Mybl2/Knl1/Ccnb2/Rad54l/Ttk/Ccna2/Kif11/Cdc20/Bub1/Espl1/Stmn1/Fbxo5/Nusap1/Kif4/Mcm5/Prc1/Top2a/Ndc80
HALLMARK_TNFA_SIGNALING_VIA_NFKB	0.441018	1.80715	0.0127099	0.0360113	0.0211831	Slc2a6/Cxcl10/Ccl5/Lif/Tnc/Plk2/Pmepa1/Plaur/Fosl1/Ifit2/Cxcl5/Nfkbie/Ptgs2/Klf2/Inhba
HALLMARK_PEROXISOME	-0.481238	-2.0204	0.00607029	0.0210855	0.0124032	Acox1/Cat/Aldh1a1/Mlycd/Acsl1/Gnpat/Crat/Dhrs3/Ehhadh/Retsat/Ephx2/Sult2b1
HALLMARK_BILE_ACID_METABOLISM	-0.497097	-2.08698	0.00385173	0.0184885	0.0108756	Gclm/Cat/Abca1/Aldh1a1/Mlycd/Acsl1/Gnpat/Pxmp2/Retsat/Lipe/Ephx2/Sult2b1
HALLMARK_XENOBIOTIC_METABOLISM	-0.501502	-2.64658	1.75762e-05	0.000149398	8.78812e-05	Acox1/Hsd11b1/Cat/Cbr1/Slc46a3/Pcx/Cdo1/Aco2/Etfdh/Abhd6/Ndrg2/Por/Maoa/Adh1/Gsta3/Retsat/Abcc2/Cd36/Ces1d/Itih4/Car2/Cyp2e1/Acox2
HALLMARK_OXIDATIVE_PHOSPHORYLATION	-0.602151	-3.25301	7.8283e-09	8.87207e-08	5.21886e-08	Uqcrfs1/Idh3a/Acadm/Gpx4/Uqcrc2/Acadvl/Ldhb/Cox5b/Dlat/Ndufs1/Uqcrq/Timm10/Mdh1/Echs1/Aco2/Ndufv1/Ndufc1/Ndufab1/Etfdh/Hadhb/Atp5b/Pdhb/Sdhb/Por/Aldh6a1/Retsat/Bckdha
HALLMARK_FATTY_ACID_METABOLISM	-0.639685	-3.48698	5.35061e-11	9.09604e-10	5.35061e-10	Acox1/Acads/Acadm/Cbr3/Cpt2/Acadvl/Aldh1a1/Mlycd/Hsdl2/Acsl1/Cbr1/Mdh1/Echs1/Gpd1/Crat/Aco2/Reep6/Etfdh/Hadhb/G0s2/Pdhb/Maoa/Ehhadh/Aoc3/Adh1/Retsat/Cd36/Car2/Gpd2/Ppara
HALLMARK_ADIPOGENESIS	-0.644698	-4.18433	6.33092e-19	2.15251e-17	1.26618e-17	Acox1/Idh3a/Acads/Acadm/Pim3/Cpt2/Gpx4/Orm1/Cat/Abca1/Sult1a1/Tst/Pparg/Gbe1/Slc25a10/Cavin2/Pgm1/Dnajc15/Dlat/Uqcrq/Dhrs7b/Coq3/Echs1/Crat/Sqor/Gpam/Aco2/Reep5/Lpl/Bcl6/Reep6/Ndufab1/Enpp2/Mccc1/Sdhb/Cmbl/Por/Dbt/Retn/Retsat/Fabp4/Bckdha/Sparcl1/Nabp1/Lipe/Adig/Cd36/Adipoq/Itga7/Plin2/Gpd2/Sncg/Ephx2
